# Supplementary material for: Arboretum: Reconstruction and analysis of the evolutionary history of condition-specific transcriptional modules
Source: HighWire-hosted journal article supplement (doi:10.1101/gr.146233.112), 2013-05-02
Supplement: Supplemental_Figure_Legends.docx [file Supplemental_Figure_Legends.docx]

**Supplementary Figure Legends**

**Supplementary Figure 1. Performance of Arboretum and other methods on simulated data with known module assignments.** Shown is the agreement between the inferred module assignment and the ground truth module assignment (Y axis) for each species (X axis) using Arboretum (red circles), Ortho-seeded clustering (blue triangles) and soft clustering (black squares). The standard deviations are estimated using different random initializations of each algorithm.

**Supplementary Figure 2. Accuracy of inferred modules using simulated “ground truth” data.** For each species, shown is the accuracy of inferred modules (Y axis) at different values of the self-transition probability, *p*, (the probability of maintaining the same module assignment between a species and its immediate ancestor, X axis), used to initialize the transition matrices, on data generated from the generative model of Arboretum. Error bars are obtained from 20 runs of Arboretum for each value of *p*, each run with a different random initialization.

**Supplementary Figure 3. Accuracy of inferred transition matrices using simulated “ground truth” data.** For each species, shown is the mean-squared error (Y axis) between the inferred transition matrix and the true transition matrix that was used to generate the data, at different values of the self-transition probability, *p*, (the probability of maintaining the same module assignment between a species and its immediate ancestor, X axis), used to initialize the transition matrices. Error bars are obtained from 20 runs of Arboretum for each *p*, each run with a different random initialization.

**Supplementary Figure 4. Distribution of mismatched module assignments using simulated “ground truth” data.**

Shown is the fraction of genes assigned to the correct module (diagonal) and fraction assigned to incorrect modules (off-diagonal) for the three ancestral species (0: white, no overlap; 1: green, full overlap). Fractions are shown for different values of the transition probability matrix initialization. Module numbers 1 to 5 correspond to the range from strong reduction to strong induction (as in **Fig. 3**). Mismatches are concentrated adjacent to the diagonal suggesting the errors in assignment of modules are primarily due to transitions between modules exhibiting neighboring expression patters, that is between Modules 1 and 2 or Modules 2 and 3 etc.).

**Supplementary Figure 5.** **Expression profiles of the heat shock response in 8 species.** Shown are expression profiles during the heat shock response in eight *Ascomycete* species (top). Rows: genes; columns: time point. Red: induced, green: repressed; black: unchanged (relative to pre-stress levels, color scale, bottom). Grey: missing values. Genes are clustered using hierarchical clustering with average linkage; species are ordered phylogenetically, and samples by time point.

**Supplementary Figure 6. Transcription factor binding sites enriched in heat shock modules.** Shown are transcription factor binding sites (rows) that are enriched (FDR<0.05) in each module (Module 1 (M1) – green, Module 2 (M2) – light green, Module 4 (M4) – pink; Module 5 (M5) – red) in a given species (column). AnFDR<0.05is used for determining enrichment.

**Supplementary Figure 7**. **Similarity of stress modules within a species.** Shown is a comparison of modules identified by Arboretum in the transcriptional response to heat shock (Heat), oxidative stress (Ox) and salt stress (Salt) in all extant and ancestral species (major rows). Each matrix shows overlapping gene membership (*F*-score overlap) between all pairs of modules for one pair of conditions in one species. *F*-score overlap ranges from 0 (no overlap, white) to 1 (full overlap, dark blue).

**Supplementary Figure 8.**  **Overlap of modules between species for each stress**. Shown is the degree of overlap in orthologous genes between every pair of modules, M1-M5 (rows and columns in each matrix), for each pair of extant species in heat, salt and oxidative stress. Black intensity is proportional to -log(*p*-value) of the Hyper-geometric distribution.

**Supplementary Figure 9. Overlap between *S. cerevisiae* Environmental Stress Response (ESR) and stress-specific modules in different species.** Overlap in gene content between the *S. cerevisiae* induced and repressed ESR genes (minor rows, UP and DOWN, respectively) and the five modules identified by Arboretum (minor columns 1-5) in each stress (Heat, Salt, Ox, major rows) in each species (major columns). Number in cell: *F*-score match.

**Supplementary Figure 10. A pan-stress response in five *Ascomycete* species is captured by seven modules. (a)** Expression modules identified by Arboretum in the transcriptional response to all three stresses in five species. Shown are the expression modules (1-7, heat maps, middle) in each of five species (species tree, left) at denoted time points prior to and following heat shock (first 5 columns), high salt (next four columns) and oxidative stress (last four columns). Color bar denotes expression relative to pre-stress time zero. Red – induced, green – repressed, black – no change. Each heatmap shows the expression profile of all genes assigned to that module in a given species. The heatmap height is proportional to the number of genes in the module (marked on top). All modules in one column are mapped to the same ancestral module ID (M1-7, top) at the LCA of these five species. **(b)** Overlap of modules between species. Shown is the degree of overlap in orthologous genes between every pair of modules 1-7 (rows and columns in each matrix) in every pair of extant species. Diagonal elements (red): overlap between modules of the same ID; off-diagonal elements (blue): overlap between modules of different IDs. Red and blue intensity is proportional to -log(*p*-value) of the Hyper-geometric distribution (color scales, right).

**Supplementary Figure 11. Ancestral induced and repressed ESR modules.** Shown are expression and module assignments of genes from module 2 (strongly induced) and module 6 (strongly repressed) inferred in the LCA inferred using the merged stress dataset. Gene names corresponding to these panels are in **Supplementary Table** **6**. Ancestral ESR genes from Module 1 (most strongly repressed) and Module 7 (most strongly induced) are in **Fig. 4**.

**Supplementary Figure 12. Conserved genes contribute to conserved regulation of functional processes. (a)** Cumulative distribution of similarity in gene content (*F*-score, x-axis) for the GO process enriched in orthologous modules (mapped to same Arboretum module ID in LCA; blue), and in non-orthologous modules (mapped to different module IDs of the LCA; pink) in heat shock. **(b, c)** Example GO processes that are exceptions to the rule. Left: Module assignments of genes (rows) contributing to process enrichment across species (columns), color-coded as in **Figure. 2** (green, light green, yellow, pink, red from Module 1 to 5). Right: degree of overlap between species in module genes annotated to the process. (blue: high overlap; white: low). (**b**) ‘response to stimulus’ is conserved across species in module 4 (mildly induced, pink) across the four species, but through distinct genes; (**c**) ‘mitochondrial translation’ is diverged from Module 2 (mildly repressed, light green) to Modules 3 (no change, yellow) and 4 (mildly induced, pink) through reassignment of orthologs.

**Supplementary Figure 13. Effect of gene duplication on module divergence.** (**a**) Ancestral Module Conservation Index (AMCI) decreases as the number of duplication events increases. Shown is the average AMCI (Y axis) for each species (X axis) for Arboretum runs with orthogroups with no duplications (blue triangles), with at most one duplication (red squares), and with any number of duplications: none, one or more (green circles). Error bars are estimated using 20 random initializations of Arboretum. (**b**) Comparable numbers of reassignment of orthogroups without duplication events in different runs. Shown is the number of re-assignments (Y axis) of genes in orthogroups with no duplication events in runs with orthogroups with no duplications (0 dup), with at most one duplication (1 dup) or with any number of duplications (0, 1 or more; labeled >= 0 dup) (X axis). Each panel of three box plots compares these for one random initialization. There is no significant difference in the number of re-assignments, suggesting that the lower AMCI is due to the orthogroups with duplication.

**Supplementary Figure 14. Correlation of expression between species in different stress response datasets.**  Shown are the Pearson’s correlation coefficients between each pair of expression profiles, one from each species, for (a) microarray profiles measured in our dataset (generated in this paper and in Wapinski *et al.*, 2010) and (b) RNA-Seq profiles measured in Tirosh *et al.*, 2011. Correlations are computed using only the set of genes analyzed in Arboretum. Each time point from one condition (single time point for Tirosh *et al.*) is compared with each time point from another condition for each pair of species. Only those species that are analyzed in both studies are shown, *S. cerevisiae*, *C. albicans* and *K. lactis.* High correlation is indicated by red, and low correlation is indicated by blue.

**Supplementary Figure 15. Selection of the number of modules for heat shock response.** (a) Test data likelihood at different numbers of modules. For each of the eight species, shown is the average penalized test data likelihood (Y axis) at different module numbers (k, X axis) over different random initializations. Minimum Description Length (MDL) is used for penalization (**Supplementary** **Methods**). We selected *k*=11 as the upper bound, because *S. japonicus* likelihood plot asymptotes at *k*=11. For other species, the likelihood keeps increasing but the greatest increase in likelihood is from *k*=5 and *k*=7. (**b**) Average penalized log likelihood when using Arboretum as a function of *k*. The average penalized log likelihood of all the training data is calculated from different random initializations of the Arboretum algorithm. (**c**) Mean module profiles for the eight species (major columns), for different values of *k* (major rows). Each line plot in a different color is the mean expression profile of a particular module (4 time points for *S. japonicus* and *S. pombe*, and 5 time points for the other species). Although the log likelihood increases as function of *k*, the profiles obtained with higher *k* do not represent different dynamics, but rather minor absolute shifts in the profiles obtained for *k*=5.

**Supplementary Figure 16. Comparable gene induction during the response of *C. glabrata* to heat shock at 37°C and 42°C.** Shown are the expression profiles of genes known to be induced in the *S. cerevisiae* Environmental Stress Response (ESR) (Gasch *et al.* 2000). Rows: genes; columns: time point of measured response. Red: induced, green: repressed, black: unchanged, all relative to expression prior to heat shock.

**Supplementary Table Legends**

**Supplementary Table 1. Highly conserved GO Processes.** Shown are GO processes enriched in the same module in >90% of the ancestral and extant species in the heat shock response. -1 corresponds to “not enriched”. All other numbers indicate the module ID in which a process is enriched.

**Supplementary Table 2. GO Processes enriched in any module in any species in the response to heat shock.** -1 corresponds to “not enriched”. All other numbers indicate the module ID in which a process is enriched.

**Supplementary Table 3. GO Processes enriched in any module in any species in the response to merged stresses.** -1 corresponds to “not enriched”. All other numbers indicate the module ID in which a process is enriched.

**Supplementary Table 4. Gene sets with important properties identified using Arboretum. Set 1.** We defined the ancestral ESR as the set of genes in four of the modules inferred in A11 (LCA of *S. cerevisiae*, *C. glabrata*, *S. castellii*, *K. lactis* and *C. albicans*) in the pan-stress analysis*:* most strongly induced (Module 7), strongly induced (Module 6), strongly repressed (Module 2) and most strongly repressed (Module 1). (**Fig. 4d, e** and **Supplementary Fig. 11**).**Set 2***.* Sets of genes involved in mitochondrial translation and response to stimulus shown in **Supplementary Fig. 11. Set 3**. Genes classified as stationary or mobile in heat shock or glucose depletion.

**Supplementary Table 5. GO processes enriched for re-assigned genes.** For each process, shown are KS-test p-values assessing the difference in distribution of re-assignments of each GO process compared to a background defined by all genes with Arboretum module assignments, in either the heat shock response (left) or glucose depletion (right). We performed two tests per process, testing if the number of module re-assignments of the genes annotated with a given GO process is either significantly higher (CDF shifted right) or lower (CDF shifted left) than background. Only GO processes with at least 10 genes with Arboretum module assignments were considered. Only GO processes that are either significantly higher or significantly lower in at least one of the responses (KS-test *p*-value <0.05) are shown

**Supplementary Table 6. GO processes enriched in mobile genes (high module re-assignment) and stationary genes (low module reassignment)** in heat shock and glucose depletion (carbon). Enrichment was detected by a Hyper-geometric test (FDR<0.05).
