# Supplementary material for: Arboretum: Reconstruction and analysis of the evolutionary history of condition-specific transcriptional modules
Source: HighWire-hosted journal article supplement (doi:10.1101/gr.146233.112), 2013-05-02
Supplement: Supplemental_Tables.xlsx [file Supplemental_Tables.xlsx]

## Sheet: Supp Table 1
Supplementary Table 1
GO Processes conserved in >90% of the species under Heat shock	Scer	Cgla	Anc4	Scas	Anc5	Kwal	Klac	Anc8	Anc9	Calb	Anc11	Sjap	Spom	Anc13	Anc14
RNA-5'-end-processing:1	1	1	1	1	1	1	1	1	1	1	1	1	1	1	1
RNA-metabolic-process:1	1	1	1	1	1	1	1	1	1	1	1	1	1	1	1
RNA-metabolic-process:2	2	2	2	-1	2	2	-1	2	2	2	2	-1	-1	-1	2
RNA-modification:1	1	1	1	1	1	1	1	1	1	1	1	1	1	1	1
RNA-modification:2	-1	-1	-1	-1	-1	-1	-1	2	-1	-1	-1	-1	-1	-1	-1
RNA-processing:1	1	1	1	1	1	1	1	1	1	1	1	1	1	1	1
RNA-processing:2	-1	-1	2	-1	2	-1	-1	2	2	-1	2	-1	-1	-1	2
carbohydrate-catabolic-process:4	-1	4	-1	-1	-1	-1	-1	-1	-1	-1	-1	-1	-1	-1	-1
carbohydrate-catabolic-process:5	5	5	5	5	5	5	5	5	5	5	5	5	5	-1	5
catabolic-process:4	4	4	4	4	4	4	4	4	4	4	4	4	4	4	4
catabolic-process:5	5	5	5	5	5	5	5	5	5	5	5	-1	-1	-1	-1
cellular-catabolic-process:4	4	4	4	4	4	4	4	4	4	4	4	4	4	4	4
cellular-catabolic-process:5	5	-1	-1	-1	-1	-1	-1	-1	-1	5	-1	-1	-1	-1	-1
cellular-component-biogenesis:1	1	1	1	1	1	1	1	1	1	1	1	1	1	1	1
cellular-component-biogenesis-at-cellular-level:1	1	1	1	1	1	1	1	1	1	1	1	1	1	1	1
cellular-macromolecule-catabolic-process:4	4	4	4	4	4	4	4	4	4	4	4	4	4	4	4
cellular-macromolecule-catabolic-process:5	-1	-1	-1	-1	-1	-1	-1	-1	-1	5	-1	-1	-1	-1	-1
cellular-nitrogen-compound-metabolic-process:1	1	1	1	1	1	1	1	1	1	1	1	1	1	1	1
cellular-nitrogen-compound-metabolic-process:2	2	2	2	-1	2	-1	-1	2	2	2	2	-1	2	-1	2
cellular-protein-catabolic-process:4	4	4	4	4	4	4	4	4	4	4	4	4	4	4	4
cellular-protein-catabolic-process:5	-1	-1	-1	-1	-1	-1	-1	-1	-1	5	-1	-1	-1	-1	-1
cleavage-involved-in-rRNA-processing:1	1	1	1	1	1	1	1	1	1	1	1	1	1	1	1
endonucleolytic-cleavage-in-5'-ETS-of-tricistronic-rRNA-transcript-(SSU-rRNA,-5.8S-rRNA,-LSU-rRNA):1	1	1	1	1	1	1	1	1	1	1	1	1
endonucleolytic-cleavage-in-ITS1-to-separate-SSU-rRNA-from-5.8S-rRNA-and-LSU-rRNA-from-tricistronic-rRNA-transcript-(SSU-rRNA,-5.8S-rRNA,-LSU-rRNA):1	1	1	1	1	1	1
endonucleolytic-cleavage-involved-in-rRNA-processing:1	1	1	1	1	1	1	1	1	1	1	1	1	1	1	1
endonucleolytic-cleavage-of-tricistronic-rRNA-transcript-(SSU-rRNA,-5.8S-rRNA,-LSU-rRNA):1	1	1	1	1	1	1	1	1	1	1	1	1	1
endonucleolytic-cleavage-to-generate-mature-5'-end-of-SSU-rRNA-from-(SSU-rRNA,-5.8S-rRNA,-LSU-rRNA):1	1	1	1	1	1	1	1	1	1	1	1	1
establishment-of-organelle-localization:1	1	1	1	1	1	1	1	1	1	1	1	1	1	1	1
establishment-of-ribosome-localization:1	1	1	1	1	1	1	1	1	1	1	1	1	1	1	1
gene-expression:1	1	1	1	1	1	1	1	1	1	1	1	1	1	1	1
gene-expression:2	2	2	2	2	2	2	2	2	2	2	2	-1	-1	-1	2
macromolecule-catabolic-process:4	4	4	4	4	4	4	4	4	4	4	4	4	4	4	4
macromolecule-catabolic-process:5	-1	-1	-1	-1	-1	-1	-1	-1	-1	5	-1	-1	-1	-1	-1
maturation-of-5.8S-rRNA:1	1	1	1	1	1	1	1	1	1	1	1	1	1	1	1
maturation-of-5.8S-rRNA-from-tricistronic-rRNA-transcript-(SSU-rRNA,-5.8S-rRNA,-LSU-rRNA):1	1	1	1	1	1	1	1	1	1	1	1	1	1
maturation-of-LSU-rRNA:1	1	1	1	1	1	1	1	1	1	1	1	1	1	1	1
maturation-of-LSU-rRNA-from-tricistronic-rRNA-transcript-(SSU-rRNA,-5.8S-rRNA,-LSU-rRNA):1	1	1	1	1	1	1	1	1	1	1	1	1	1
maturation-of-SSU-rRNA:1	1	1	1	1	1	1	1	1	1	1	1	1	1	1	1
maturation-of-SSU-rRNA-from-tricistronic-rRNA-transcript-(SSU-rRNA,-5.8S-rRNA,-LSU-rRNA):1	1	1	1	1	1	1	1	1	1	1	1	1	1
methylation:1	1	1	1	1	1	1	1	1	1	1	1	1	1	1	1
methylation:2	-1	-1	-1	-1	-1	-1	2	-1	-1	-1	-1	-1	-1	-1	-1
modification-dependent-macromolecule-catabolic-process:4	4	4	4	4	4	4	4	4	4	4	4	4	4	4	4
modification-dependent-macromolecule-catabolic-process:5	-1	-1	-1	-1	-1	-1	-1	-1	-1	5	-1	-1	-1	-1	-1
modification-dependent-protein-catabolic-process:4	4	4	4	4	4	4	4	4	4	4	4	4	4	4	4
modification-dependent-protein-catabolic-process:5	-1	-1	-1	-1	-1	-1	-1	-1	-1	5	-1	-1	-1	-1	-1
ncRNA-5'-end-processing:1	1	1	1	1	1	1	1	1	1	1	1	1	1	1	1
ncRNA-metabolic-process:1	1	1	1	1	1	1	1	1	1	1	1	1	1	1	1
ncRNA-metabolic-process:2	-1	-1	2	-1	2	-1	-1	2	2	-1	-1	-1	-1	-1	2
ncRNA-processing:1	1	1	1	1	1	1	1	1	1	1	1	1	1	1	1
ncRNA-processing:2	-1	-1	2	-1	-1	-1	-1	-1	-1	-1	-1	-1	-1	-1	-1
nitrogen-compound-metabolic-process:1	1	1	1	1	1	1	1	1	1	1	1	1	1	1	1
nitrogen-compound-metabolic-process:2	2	2	2	-1	2	-1	-1	2	2	2	2	-1	2	-1	2
nucleic-acid-metabolic-process:1	1	1	1	1	1	1	1	1	1	1	1	1	1	1	1
nucleic-acid-metabolic-process:2	2	2	2	-1	-1	-1	-1	-1	-1	2	-1	-1	-1	-1	-1
nucleic-acid-phosphodiester-bond-hydrolysis:1	1	1	1	1	1	1	1	1	1	1	1	1	1	1	1
nucleobase,-nucleoside,-nucleotide-and-nucleic-acid-metabolic-process:1	1	1	1	1	1	1	1	1	1	1	1	1	1	1	1
nucleobase,-nucleoside,-nucleotide-and-nucleic-acid-metabolic-process:2	2	2	2	-1	-1	-1	-1	-1	-1	2	2	-1	-1	-1	-1
one-carbon-metabolic-process:1	1	1	1	1	1	1	1	1	1	1	1	1	1	1	1
organelle-assembly:1	1	1	1	1	1	1	1	1	1	1	1	1	1	1	1
positive-regulation-of-transcription-from-RNA-polymerase-I-promoter:1	1	1	1	1	1	1	1	1	1	1	1	1	1	1	1
proteasomal-protein-catabolic-process:4	4	4	4	4	4	4	4	4	4	4	4	4	4	4	4
proteasomal-protein-catabolic-process:5	-1	-1	-1	-1	-1	-1	-1	-1	-1	5	-1	-1	-1	-1	-1
proteasomal-ubiquitin-dependent-protein-catabolic-process:4	4	4	4	4	4	4	4	4	4	4	4	4	4	4	4
proteasomal-ubiquitin-dependent-protein-catabolic-process:5	-1	-1	-1	-1	-1	-1	-1	-1	-1	5	-1	-1	-1	-1	-1
protein-catabolic-process:4	4	4	4	4	4	4	4	4	4	4	4	4	4	4	4
protein-catabolic-process:5	-1	-1	-1	-1	-1	-1	-1	-1	-1	5	-1	-1	-1	-1	-1
protein-refolding:5	5	5	5	5	5	5	5	5	5	5	5	5	5	5	5
proteolysis:4	4	4	4	4	4	4	4	4	4	4	4	4	4	4	4
proteolysis:5	-1	-1	-1	-1	-1	-1	-1	-1	-1	5	-1	-1	-1	-1	-1
proteolysis-involved-in-cellular-protein-catabolic-process:4	4	4	4	4	4	4	4	4	4	4	4	4	4	4	4
proteolysis-involved-in-cellular-protein-catabolic-process:5	-1	-1	-1	-1	-1	-1	-1	-1	-1	5	-1	-1	-1	-1	-1
rRNA-5'-end-processing:1	1	1	1	1	1	1	1	1	1	1	1	1	1	1	1
rRNA-containing-ribonucleoprotein-complex-export-from-nucleus:1	1	1	1	1	1	1	1	1	1	1	1	1	1	1	1
rRNA-metabolic-process:1	1	1	1	1	1	1	1	1	1	1	1	1	1	1	1
rRNA-modification:1	1	1	1	1	1	1	1	1	1	1	1	1	1	1	1
rRNA-processing:1	1	1	1	1	1	1	1	1	1	1	1	1	1	1	1
regulation-of-transcription-from-RNA-polymerase-I-promoter:1	1	1	1	1	1	1	1	1	1	1	1	1	1	1	1
ribonucleoprotein-complex-assembly:1	1	1	1	1	1	1	1	1	1	1	1	1	1	1	1
ribonucleoprotein-complex-biogenesis:1	1	1	1	1	1	1	1	1	1	1	1	1	1	1	1
ribonucleoprotein-complex-export-from-nucleus:1	1	1	1	1	1	1	1	1	1	1	1	1	1	1	1
ribonucleoprotein-complex-localization:1	1	1	1	1	1	1	1	1	1	1	1	1	1	1	1
ribonucleoprotein-complex-subunit-organization:1	1	1	1	1	1	1	1	1	1	1	1	1	1	1	1
ribosomal-large-subunit-assembly:1	1	1	1	1	1	1	1	1	1	1	1	1	1	1	1
ribosomal-large-subunit-biogenesis:1	1	1	1	1	1	1	1	1	1	1	1	1	1	1	1
ribosomal-small-subunit-biogenesis:1	1	1	1	1	1	1	1	1	1	1	1	1	1	1	1
ribosomal-subunit-export-from-nucleus:1	1	1	1	1	1	1	1	1	1	1	1	1	1	1	1
ribosome-assembly:1	1	1	1	1	1	1	1	1	1	1	1	1	1	1	1
ribosome-biogenesis:1	1	1	1	1	1	1	1	1	1	1	1	1	1	1	1
ribosome-localization:1	1	1	1	1	1	1	1	1	1	1	1	1	1	1	1
ubiquitin-dependent-protein-catabolic-process:4	4	4	4	4	4	4	4	4	4	4	4	4	4	4	4
ubiquitin-dependent-protein-catabolic-process:5	-1	-1	-1	-1	-1	-1	-1	-1	-1	5	-1	-1	-1	-1	-1

## Sheet: Supp Table 2
Supplmentary Table 2
Heat GO process enrichments	Scer	Cgla	Anc4	Scas	Anc5	Kwal	Klac	Anc8	Anc9	Calb	Anc11	Sjap	Spom	Anc13	Anc14
'de-novo'-IMP-biosynthetic-process:1	-1	-1	-1	-1	-1	-1	-1	-1	-1	-1	1	-1	1	1	1
CUT-catabolic-process:1	1	1	1	-1	1	1	-1	-1	-1	-1	-1	-1	-1	1	1
CUT-metabolic-process:1	1	1	1	-1	1	1	-1	-1	-1	-1	-1	-1	-1	1	1
IMP-biosynthetic-process:1	-1	-1	-1	-1	-1	-1	-1	-1	-1	1	1	-1	-1	1	1
IMP-metabolic-process:1	-1	-1	-1	-1	-1	-1	-1	-1	-1	1	1	-1	-1	1	1
RNA-3'-end-processing:1	-1	1	1	-1	1	-1	-1	-1	-1	-1	-1	-1	-1	-1	-1
RNA-5'-end-processing:1	1	1	1	1	1	1	1	1	1	1	1	1	1	1	1
RNA-catabolic-process:1	-1	1	-1	-1	-1	-1	-1	-1	-1	-1	-1	-1	-1	-1	-1
RNA-localization:1	-1	-1	-1	-1	-1	-1	-1	-1	-1	1	-1	-1	-1	-1	-1
RNA-metabolic-process:1	1	1	1	1	1	1	1	1	1	1	1	1	1	1	1
RNA-methylation:1	1	1	1	1	1	1	1	1	1	1	1	1	-1	1	1
RNA-modification:1	1	1	1	1	1	1	1	1	1	1	1	1	1	1	1
RNA-processing:1	1	1	1	1	1	1	1	1	1	1	1	1	1	1	1
RNA-surveillance:1	1	1	1	-1	1	1	1	1	1	-1	1	-1	-1	1	1
U4-snRNA-3'-end-processing:1	1	1	1	1	1	1	1	1	1	1	1	-1	-1	1	1
U5-snRNA-3'-end-processing:1	-1	1	1	1	1	1	1	1	1	-1	1	-1	-1	1	1
aerobic-respiration:1	-1	-1	-1	-1	-1	-1	-1	-1	-1	1	-1	-1	-1	-1	-1
amine-biosynthetic-process:1	-1	-1	-1	-1	-1	-1	-1	-1	-1	1	-1	1	-1	-1	-1
amine-metabolic-process:1	-1	-1	-1	-1	-1	-1	-1	-1	-1	1	-1	-1	-1	-1	-1
arginine-biosynthetic-process:1	-1	-1	-1	-1	-1	-1	-1	-1	-1	1	-1	-1	-1	-1	-1
aspartate-family-amino-acid-metabolic-process:1	-1	-1	-1	-1	-1	-1	-1	-1	-1	1	-1	1	-1	-1	-1
biosynthetic-process:1	-1	-1	-1	-1	-1	-1	-1	-1	-1	1	-1	-1	-1	-1	-1
box-C/D-snoRNA-metabolic-process:1	1	1	-1	-1	-1	-1	1	-1	-1	-1	-1	-1	-1	-1	-1
box-C/D-snoRNA-processing:1	1	1	-1	-1	-1	-1	1	-1	-1	-1	-1	-1	-1	-1	-1
carboxylic-acid-biosynthetic-process:1	-1	-1	-1	-1	-1	-1	-1	-1	-1	1	-1	1	-1	-1	1
carboxylic-acid-metabolic-process:1	-1	-1	-1	-1	-1	-1	-1	-1	-1	1	-1	-1	-1	-1	-1
cellular-alcohol-biosynthetic-process:1	-1	-1	-1	-1	-1	-1	-1	-1	-1	-1	-1	1	-1	-1	-1
cellular-alcohol-metabolic-process:1	-1	-1	-1	-1	-1	-1	-1	-1	-1	-1	-1	1	-1	-1	-1
cellular-amine-metabolic-process:1	-1	-1	-1	-1	-1	-1	-1	-1	-1	1	-1	-1	-1	-1	-1
cellular-amino-acid-biosynthetic-process:1	-1	-1	-1	-1	-1	-1	-1	-1	-1	1	-1	1	-1	-1	-1
cellular-amino-acid-metabolic-process:1	-1	-1	-1	-1	-1	-1	-1	-1	-1	1	-1	1	-1	-1	-1
cellular-aromatic-compound-metabolic-process:1	-1	-1	-1	-1	-1	-1	-1	-1	-1	-1	-1	1	1	-1	-1
cellular-biosynthetic-process:1	-1	-1	-1	-1	-1	-1	-1	-1	-1	1	-1	-1	-1	-1	-1
cellular-component-biogenesis:1	1	1	1	1	1	1	1	1	1	1	1	1	1	1	1
cellular-component-biogenesis-at-cellular-level:1	1	1	1	1	1	1	1	1	1	1	1	1	1	1	1
cellular-component-organization-or-biogenesis:1	1	1	1	1	1	1	1	1	1	1	1	-1	-1	1	1
cellular-component-organization-or-biogenesis-at-cellular-level:1	1	1	1	1	1	1	1	1	1	1	1	-1	-1	1	1
cellular-ketone-metabolic-process:1	-1	-1	-1	-1	-1	-1	-1	-1	-1	1	-1	-1	-1	-1	-1
cellular-macromolecular-complex-assembly:1	-1	-1	1	-1	1	1	1	1	1	-1	1	-1	-1	-1	-1
cellular-macromolecular-complex-subunit-organization:1	-1	-1	-1	-1	-1	-1	1	1	-1	-1	-1	-1	-1	-1	-1
cellular-macromolecule-metabolic-process:1	1	1	1	1	1	1	1	1	1	1	1	1	-1	1	1
cellular-metabolic-compound-salvage:1	-1	1	1	-1	1	1	-1	-1	-1	1	1	-1	-1	-1	-1
cellular-metabolic-process:1	1	1	1	1	1	1	1	1	1	1	1	1	-1	1	1
cellular-modified-amino-acid-biosynthetic-process:1	1	-1	-1	-1	-1	-1	-1	-1	-1	-1	-1	-1	-1	-1	-1
cellular-nitrogen-compound-biosynthetic-process:1	-1	-1	-1	-1	-1	-1	-1	-1	-1	1	-1	1	1	1	1
cellular-nitrogen-compound-metabolic-process:1	1	1	1	1	1	1	1	1	1	1	1	1	1	1	1
cellular-process:1	1	-1	-1	-1	-1	1	1	1	1	1	1	-1	-1	-1	-1
cellular-respiration:1	-1	-1	-1	-1	-1	-1	-1	-1	-1	1	-1	-1	-1	-1	-1
ceramide-metabolic-process:1	-1	-1	-1	-1	-1	-1	-1	-1	-1	-1	-1	-1	1	-1	-1
cleavage-involved-in-rRNA-processing:1	1	1	1	1	1	1	1	1	1	1	1	1	1	1	1
deoxyribonucleotide-biosynthetic-process:1	-1	-1	-1	-1	-1	-1	-1	-1	-1	-1	-1	1	-1	-1	-1
endonucleolytic-cleavage-in-5'-ETS-of-tricistronic-rRNA-transcript-(SSU-rRNA,-5.8S-rRNA,-LSU-rRNA):1	1	1	1	1	1	1	1	1	1	1	1	1
endonucleolytic-cleavage-in-ITS1-to-separate-SSU-rRNA-from-5.8S-rRNA-and-LSU-rRNA-from-tricistronic-rRNA-transcript-(SSU-rRNA,-5.8S-rRNA,-LSU-rRNA):1	1	1	1	1	1	1
endonucleolytic-cleavage-involved-in-rRNA-processing:1	1	1	1	1	1	1	1	1	1	1	1	1	1	1	1
endonucleolytic-cleavage-of-tricistronic-rRNA-transcript-(SSU-rRNA,-5.8S-rRNA,-LSU-rRNA):1	1	1	1	1	1	1	1	1	1	1	1	1	1
endonucleolytic-cleavage-to-generate-mature-5'-end-of-SSU-rRNA-from-(SSU-rRNA,-5.8S-rRNA,-LSU-rRNA):1	1	1	1	1	1	1	1	1	1	1	1	1
ergosterol-biosynthetic-process:1	-1	-1	-1	-1	-1	-1	-1	-1	-1	-1	-1	1	-1	-1	-1
ergosterol-metabolic-process:1	-1	-1	-1	-1	-1	-1	-1	-1	-1	-1	-1	1	-1	-1	-1
establishment-of-organelle-localization:1	1	1	1	1	1	1	1	1	1	1	1	1	1	1	1
establishment-of-ribosome-localization:1	1	1	1	1	1	1	1	1	1	1	1	1	1	1	1
exonucleolytic-nuclear-transcribed-mRNA-catabolic-process-involved-in-deadenylation-dependent-decay:1	-1	1	-1	-1	-1	-1	-1	-1	-1	-1	-1	-1	-1	-1	-1
exonucleolytic-trimming-involved-in-rRNA-processing:1	1	1	1	1	1	1	1	1	1	-1	1	-1	-1	1	1
exonucleolytic-trimming-to-generate-mature-3'-end-of-5.8S-rRNA-from-tricistronic-rRNA-transcript-(SSU-rRNA,-5.8S-rRNA,-LSU-rRNA):1	1	1	1	1	1	1	1	-1	1	-1	-1	1	1
fatty-acid-biosynthetic-process:1	-1	-1	-1	-1	-1	-1	-1	-1	-1	-1	-1	-1	-1	-1	1
gene-expression:1	1	1	1	1	1	1	1	1	1	1	1	1	1	1	1
glutamate-biosynthetic-process:1	-1	-1	-1	-1	-1	-1	-1	-1	-1	1	-1	-1	-1	-1	-1
glutamate-metabolic-process:1	-1	-1	-1	-1	-1	-1	-1	-1	-1	1	-1	-1	-1	-1	-1
glutamine-family-amino-acid-biosynthetic-process:1	-1	-1	-1	-1	-1	-1	-1	-1	-1	1	-1	-1	-1	-1	-1
glutamine-family-amino-acid-metabolic-process:1	-1	-1	-1	-1	-1	-1	-1	-1	-1	1	-1	1	-1	1	-1
glutamine-metabolic-process:1	-1	-1	-1	-1	-1	-1	1	-1	-1	1	1	1	-1	1	1
glycine-metabolic-process:1	-1	-1	-1	-1	-1	-1	-1	-1	-1	-1	-1	-1	1	-1	-1
guanosine-metabolic-process:1	-1	1	-1	-1	-1	-1	-1	-1	-1	-1	-1	-1	-1	-1	-1
heterocycle-biosynthetic-process:1	-1	-1	-1	-1	-1	-1	-1	-1	-1	-1	-1	-1	1	-1	-1
intracellular-mRNA-localization:1	-1	-1	1	-1	1	-1	1	1	1	1	-1	-1	-1	-1	-1
intronic-box-C/D-snoRNA-processing:1	1	1	-1	-1	-1	-1	-1	-1	-1	-1	-1	-1	-1	-1	-1
intronic-snoRNA-processing:1	1	1	-1	-1	-1	-1	-1	-1	-1	-1	-1	-1	-1	-1	-1
lysine-biosynthetic-process:1	-1	-1	-1	-1	-1	-1	-1	-1	-1	-1	-1	-1	-1	1	-1
lysine-metabolic-process:1	-1	-1	-1	-1	-1	-1	-1	-1	-1	-1	-1	-1	-1	1	-1
mRNA-catabolic-process:1	-1	1	1	-1	-1	-1	-1	-1	-1	-1	-1	-1	-1	-1	-1
mRNA-metabolic-process:1	-1	1	-1	-1	-1	-1	-1	-1	-1	-1	-1	-1	-1	-1	-1
macromolecular-complex-assembly:1	-1	-1	-1	-1	-1	-1	1	1	1	-1	-1	-1	-1	-1	-1
macromolecular-complex-subunit-organization:1	-1	-1	-1	-1	-1	-1	1	1	-1	-1	-1	-1	-1	-1	-1
macromolecule-metabolic-process:1	1	1	1	1	1	1	1	1	1	1	1	1	-1	1	1
macromolecule-methylation:1	1	1	1	1	1	1	1	1	1	1	1	-1	1	1	1
macromolecule-modification:1	-1	1	-1	-1	-1	-1	-1	-1	-1	-1	-1	-1	-1	-1	-1
maturation-of-5.8S-rRNA:1	1	1	1	1	1	1	1	1	1	1	1	1	1	1	1
maturation-of-5.8S-rRNA-from-tricistronic-rRNA-transcript-(SSU-rRNA,-5.8S-rRNA,-LSU-rRNA):1	1	1	1	1	1	1	1	1	1	1	1	1	1
maturation-of-LSU-rRNA:1	1	1	1	1	1	1	1	1	1	1	1	1	1	1	1
maturation-of-LSU-rRNA-from-tricistronic-rRNA-transcript-(SSU-rRNA,-5.8S-rRNA,-LSU-rRNA):1	1	1	1	1	1	1	1	1	1	1	1	1	1
maturation-of-SSU-rRNA:1	1	1	1	1	1	1	1	1	1	1	1	1	1	1	1
maturation-of-SSU-rRNA-from-tricistronic-rRNA-transcript-(SSU-rRNA,-5.8S-rRNA,-LSU-rRNA):1	1	1	1	1	1	1	1	1	1	1	1	1	1
membrane-lipid-metabolic-process:1	-1	-1	-1	-1	-1	-1	-1	-1	-1	-1	-1	-1	1	-1	-1
metabolic-process:1	1	1	1	1	1	1	1	1	1	1	1	1	-1	1	1
methylation:1	1	1	1	1	1	1	1	1	1	1	1	1	1	1	1
ncRNA-3'-end-processing:1	1	1	1	1	1	1	1	1	1	-1	1	-1	-1	1	1
ncRNA-5'-end-processing:1	1	1	1	1	1	1	1	1	1	1	1	1	1	1	1
ncRNA-catabolic-process:1	1	1	1	-1	1	1	1	1	1	-1	1	-1	-1	1	1
ncRNA-metabolic-process:1	1	1	1	1	1	1	1	1	1	1	1	1	1	1	1
ncRNA-processing:1	1	1	1	1	1	1	1	1	1	1	1	1	1	1	1
nitrogen-compound-metabolic-process:1	1	1	1	1	1	1	1	1	1	1	1	1	1	1	1
nonfunctional-rRNA-decay:1	-1	1	-1	-1	-1	-1	-1	-1	-1	-1	-1	-1	-1	-1	-1
nuclear-RNA-surveillance:1	1	1	1	-1	1	1	1	1	1	-1	1	-1	-1	1	1
nuclear-export:1	1	1	1	1	1	1	1	1	1	1	1	-1	1	1	1
nuclear-mRNA-surveillance:1	1	1	1	-1	1	1	1	1	1	1	1	-1	-1	-1	1
nuclear-mRNA-surveillance-of-mRNA-3'-end-processing:1	1	1	1	-1	1	1	1	1	1	-1	1	-1	-1	-1	1
nuclear-ncRNA-surveillance:1	1	1	1	1	1	1	1	1	1	-1	1	-1	-1	1	1
nuclear-polyadenylation-dependent-CUT-catabolic-process:1	1	1	1	-1	1	1	-1	-1	-1	-1	-1	-1	-1	1	1
nuclear-polyadenylation-dependent-mRNA-catabolic-process:1	1	1	1	-1	1	1	1	-1	-1	-1	-1	-1	-1	1	1
nuclear-polyadenylation-dependent-ncRNA-catabolic-process:1	1	1	1	1	1	1	1	1	1	-1	1	-1	-1	1	1
nuclear-polyadenylation-dependent-rRNA-catabolic-process:1	1	1	1	-1	1	1	1	1	1	-1	1	-1	-1	1	1
nuclear-polyadenylation-dependent-tRNA-catabolic-process:1	1	1	1	-1	1	1	1	-1	-1	-1	-1	-1	-1	1	1
nuclear-retention-of-pre-mRNA-at-the-site-of-transcription:1	1	1	1	-1	1	1	1	1	1	1	1	-1	-1	1	1
nuclear-transcribed-mRNA-catabolic-process:1	-1	1	1	-1	-1	-1	-1	-1	-1	-1	-1	-1	-1	-1	-1
nuclear-transcribed-mRNA-catabolic-process,-3'-5'-exonucleolytic-nonsense-mediated-decay:1	-1	1	-1	-1	-1	-1	-1	-1	-1	-1	-1	-1	-1	-1	-1
nuclear-transcribed-mRNA-catabolic-process,-deadenylation-dependent-decay:1	-1	1	-1	-1	-1	-1	-1	-1	-1	-1	-1	-1	-1	-1	-1
nuclear-transcribed-mRNA-catabolic-process,-exonucleolytic:1	-1	1	-1	-1	-1	-1	-1	-1	-1	-1	-1	-1	-1	-1	-1
nuclear-transcribed-mRNA-catabolic-process,-exonucleolytic,-3'-5':1	-1	1	-1	-1	-1	-1	-1	-1	-1	-1	-1	-1	-1	-1	-1
nuclear-transcribed-mRNA-catabolic-process,-non-stop-decay:1	-1	1	-1	-1	-1	-1	-1	-1	-1	-1	-1	-1	-1	-1	-1
nuclear-transcribed-mRNA-catabolic-process,-nonsense-mediated-decay:1	-1	1	-1	-1	-1	-1	-1	-1	-1	-1	-1	-1	-1	-1	-1
nuclear-transport:1	1	1	1	1	1	1	1	1	1	1	1	-1	1	1	1
nucleic-acid-metabolic-process:1	1	1	1	1	1	1	1	1	1	1	1	1	1	1	1
nucleic-acid-phosphodiester-bond-hydrolysis:1	1	1	1	1	1	1	1	1	1	1	1	1	1	1	1
nucleobase,-nucleoside,-nucleotide-and-nucleic-acid-biosynthetic-process:1	-1	-1	-1	-1	-1	-1	-1	-1	-1	1	1	1	1	1	1
nucleobase,-nucleoside,-nucleotide-and-nucleic-acid-metabolic-process:1	1	1	1	1	1	1	1	1	1	1	1	1	1	1	1
nucleobase,-nucleoside-and-nucleotide-biosynthetic-process:1	-1	-1	-1	-1	-1	-1	-1	-1	-1	1	1	1	1	1	1
nucleobase-biosynthetic-process:1	1	-1	-1	-1	-1	1	-1	-1	-1	1	1	1	1	1	1
nucleobase-metabolic-process:1	-1	-1	-1	-1	-1	1	-1	-1	-1	1	1	-1	1	1	1
nucleocytoplasmic-transport:1	1	1	1	1	1	1	1	1	1	1	1	-1	1	1	1
nucleoside-biosynthetic-process:1	1	-1	1	-1	1	1	1	1	1	1	1	-1	-1	-1	-1
nucleoside-metabolic-process:1	1	1	1	-1	1	1	-1	-1	1	1	1	-1	-1	-1	1
nucleoside-monophosphate-biosynthetic-process:1	-1	-1	1	-1	1	-1	-1	-1	-1	1	1	-1	1	1	1
nucleoside-monophosphate-metabolic-process:1	-1	-1	1	-1	1	-1	-1	-1	-1	1	1	-1	1	1	1
nucleoside-salvage:1	-1	-1	1	-1	1	1	-1	1	1	1	1	-1	-1	-1	-1
nucleotide-biosynthetic-process:1	-1	-1	-1	-1	-1	-1	-1	-1	-1	1	-1	1	1	-1	-1
one-carbon-metabolic-process:1	1	1	1	1	1	1	1	1	1	1	1	1	1	1	1
organelle-assembly:1	1	1	1	1	1	1	1	1	1	1	1	1	1	1	1
organelle-localization:1	1	1	1	1	1	1	1	1	1	-1	1	-1	-1	1	1
organic-acid-biosynthetic-process:1	-1	-1	-1	-1	-1	-1	-1	-1	-1	1	-1	1	-1	-1	1
organic-acid-metabolic-process:1	-1	-1	-1	-1	-1	-1	-1	-1	-1	1	-1	-1	-1	-1	-1
oxoacid-metabolic-process:1	-1	-1	-1	-1	-1	-1	-1	-1	-1	1	-1	-1	-1	-1	-1
peptidyl-histidine-modification:1	1	1	1	-1	-1	-1	-1	-1	-1	-1	-1	-1	-1	-1	-1
phytosteroid-biosynthetic-process:1	-1	-1	-1	-1	-1	-1	-1	-1	-1	-1	-1	1	-1	-1	-1
phytosteroid-metabolic-process:1	-1	-1	-1	-1	-1	-1	-1	-1	-1	-1	-1	1	-1	-1	-1
pigment-biosynthetic-process:1	-1	-1	-1	-1	-1	-1	-1	-1	-1	-1	-1	-1	1	-1	-1
pigment-metabolic-process:1	-1	-1	-1	-1	-1	-1	-1	-1	-1	-1	-1	-1	1	-1	-1
polyadenylation-dependent-RNA-catabolic-process:1	1	1	1	1	1	1	1	1	1	-1	1	-1	-1	1	1
polyadenylation-dependent-mRNA-catabolic-process:1	1	1	1	-1	1	1	1	-1	-1	-1	-1	-1	-1	1	1
polyadenylation-dependent-ncRNA-catabolic-process:1	1	1	1	1	1	1	1	1	1	-1	1	-1	-1	1	1
polyadenylation-dependent-snoRNA-3'-end-processing:1	1	1	1	1	1	1	1	1	1	-1	-1	-1	-1	1	1
polyphosphate-metabolic-process:1	-1	-1	-1	-1	-1	-1	-1	-1	-1	1	-1	-1	-1	-1	-1
positive-regulation-of-transcription-from-RNA-polymerase-I-promoter:1	1	1	1	1	1	1	1	1	1	1	1	1	1	1	1
positive-regulation-of-translational-fidelity:1	-1	-1	-1	-1	-1	1	-1	-1	-1	-1	-1	-1	-1	-1	-1
primary-metabolic-process:1	1	1	1	1	1	1	1	1	1	1	1	1	-1	1	1
protein-urmylation:1	-1	1	-1	-1	-1	-1	-1	-1	-1	-1	-1	-1	-1	1	-1
pseudouridine-synthesis:1	1	1	1	1	1	1	1	1	1	1	1	-1	-1	-1	1
purine-base-biosynthetic-process:1	-1	-1	-1	-1	-1	-1	-1	-1	-1	1	-1	1	1	1	1
purine-base-metabolic-process:1	-1	-1	-1	-1	-1	-1	-1	-1	-1	1	-1	-1	-1	-1	-1
purine-containing-compound-biosynthetic-process:1	-1	-1	-1	-1	-1	-1	-1	-1	-1	1	1	-1	-1	-1	-1
purine-containing-compound-salvage:1	-1	1	1	1	1	1	-1	1	1	1	1	-1	-1	-1	-1
purine-nucleoside-biosynthetic-process:1	1	-1	1	-1	1	1	1	1	1	1	1	-1	-1	1	1
purine-nucleoside-metabolic-process:1	-1	1	-1	-1	1	1	-1	-1	-1	-1	-1	-1	-1	-1	-1
purine-nucleoside-monophosphate-biosynthetic-process:1	-1	-1	-1	-1	-1	1	-1	-1	-1	1	1	-1	1	1	1
purine-nucleoside-monophosphate-metabolic-process:1	-1	-1	1	-1	1	1	-1	1	1	1	1	-1	1	1	1
purine-nucleotide-biosynthetic-process:1	-1	-1	-1	-1	-1	-1	-1	-1	-1	1	-1	-1	-1	-1	-1
purine-ribonucleoside-biosynthetic-process:1	1	-1	1	-1	1	1	1	1	1	1	1	-1	-1	1	1
purine-ribonucleoside-metabolic-process:1	-1	1	-1	-1	1	1	-1	-1	-1	-1	-1	-1	-1	-1	-1
purine-ribonucleoside-monophosphate-biosynthetic-process:1	-1	-1	-1	-1	-1	1	-1	-1	-1	1	1	-1	1	1	1
purine-ribonucleoside-monophosphate-metabolic-process:1	-1	-1	1	-1	1	1	-1	1	1	1	1	-1	1	1	1
purine-ribonucleoside-salvage:1	-1	-1	1	-1	1	1	-1	1	1	1	1	-1	-1	-1	-1
purine-ribonucleotide-biosynthetic-process:1	-1	-1	-1	-1	-1	-1	-1	-1	-1	1	-1	-1	-1	-1	-1
pyrimidine-base-biosynthetic-process:1	-1	-1	-1	-1	-1	1	-1	-1	-1	-1	-1	-1	1	-1	-1
pyrimidine-base-metabolic-process:1	-1	-1	-1	-1	-1	-1	-1	-1	-1	1	-1	-1	-1	-1	-1
pyrimidine-containing-compound-biosynthetic-process:1	-1	-1	-1	-1	-1	1	-1	-1	-1	-1	-1	-1	-1	-1	-1
pyrimidine-containing-compound-metabolic-process:1	-1	-1	-1	-1	-1	1	-1	-1	-1	-1	-1	-1	-1	-1	-1
pyrimidine-nucleoside-metabolic-process:1	1	1	1	-1	1	1	-1	-1	-1	-1	-1	-1	-1	-1	1
pyrimidine-nucleoside-monophosphate-biosynthetic-process:1	1	-1	-1	-1	-1	-1	-1	-1	-1	-1	-1	-1	-1	-1	-1
pyrimidine-nucleoside-monophosphate-metabolic-process:1	1	-1	-1	-1	-1	-1	-1	-1	-1	-1	-1	-1	-1	-1	-1
pyrimidine-nucleotide-biosynthetic-process:1	-1	-1	-1	-1	-1	1	-1	-1	-1	-1	-1	-1	-1	-1	-1
pyrimidine-nucleotide-metabolic-process:1	-1	-1	-1	-1	-1	1	-1	-1	-1	-1	-1	-1	-1	-1	-1
pyrimidine-ribonucleoside-metabolic-process:1	1	1	1	-1	1	1	-1	-1	-1	-1	-1	-1	-1	-1	1
pyrimidine-ribonucleotide-biosynthetic-process:1	1	1	1	-1	1	-1	-1	-1	-1	-1	-1	-1	1	1	1
pyrimidine-ribonucleotide-metabolic-process:1	1	1	1	-1	1	-1	-1	-1	-1	-1	-1	-1	1	1	1
rRNA-3'-end-processing:1	1	1	1	1	1	1	1	1	1	-1	1	-1	-1	1	1
rRNA-5'-end-processing:1	1	1	1	1	1	1	1	1	1	1	1	1	1	1	1
rRNA-catabolic-process:1	1	1	1	-1	1	1	1	1	1	-1	1	-1	-1	1	1
rRNA-containing-ribonucleoprotein-complex-export-from-nucleus:1	1	1	1	1	1	1	1	1	1	1	1	1	1	1	1
rRNA-metabolic-process:1	1	1	1	1	1	1	1	1	1	1	1	1	1	1	1
rRNA-methylation:1	1	1	1	1	1	1	1	1	1	1	1	-1	-1	1	1
rRNA-modification:1	1	1	1	1	1	1	1	1	1	1	1	1	1	1	1
rRNA-processing:1	1	1	1	1	1	1	1	1	1	1	1	1	1	1	1
rRNA-transcription:1	1	1	1	1	1	1	1	1	1	1	1	1	-1	1	1
regulation-of-cell-cycle:1	-1	-1	-1	-1	-1	-1	-1	-1	-1	-1	-1	1	-1	-1	-1
regulation-of-cell-cycle-process:1	-1	-1	-1	-1	-1	-1	-1	-1	-1	-1	-1	1	-1	-1	-1
regulation-of-transcription-from-RNA-polymerase-I-promoter:1	1	1	1	1	1	1	1	1	1	1	1	1	1	1	1
regulation-of-translational-elongation:1	-1	-1	-1	-1	-1	1	-1	-1	-1	-1	-1	-1	-1	-1	-1
regulation-of-translational-fidelity:1	-1	-1	-1	-1	-1	1	-1	-1	-1	-1	-1	-1	-1	-1	-1
ribonucleoprotein-complex-assembly:1	1	1	1	1	1	1	1	1	1	1	1	1	1	1	1
ribonucleoprotein-complex-biogenesis:1	1	1	1	1	1	1	1	1	1	1	1	1	1	1	1
ribonucleoprotein-complex-export-from-nucleus:1	1	1	1	1	1	1	1	1	1	1	1	1	1	1	1
ribonucleoprotein-complex-localization:1	1	1	1	1	1	1	1	1	1	1	1	1	1	1	1
ribonucleoprotein-complex-subunit-organization:1	1	1	1	1	1	1	1	1	1	1	1	1	1	1	1
ribonucleoside-biosynthetic-process:1	1	-1	1	-1	1	1	1	1	1	1	1	-1	-1	-1	-1
ribonucleoside-metabolic-process:1	1	1	1	-1	1	1	-1	-1	1	-1	1	-1	-1	-1	-1
ribonucleoside-monophosphate-biosynthetic-process:1	1	1	1	-1	1	-1	-1	-1	-1	1	1	-1	1	1	1
ribonucleoside-monophosphate-metabolic-process:1	1	1	1	1	1	1	-1	1	-1	1	1	-1	1	1	1
ribonucleotide-biosynthetic-process:1	-1	-1	-1	-1	-1	-1	-1	-1	-1	1	1	-1	1	-1	-1
ribonucleotide-metabolic-process:1	-1	-1	-1	-1	-1	-1	-1	-1	-1	1	1	-1	-1	-1	-1
ribosomal-large-subunit-assembly:1	1	1	1	1	1	1	1	1	1	1	1	1	1	1	1
ribosomal-large-subunit-biogenesis:1	1	1	1	1	1	1	1	1	1	1	1	1	1	1	1
ribosomal-large-subunit-export-from-nucleus:1	1	1	1	1	1	1	1	1	1	1	1	-1	-1	1	1
ribosomal-small-subunit-assembly:1	1	1	1	-1	1	1	1	1	1	-1	1	-1	-1	1	1
ribosomal-small-subunit-biogenesis:1	1	1	1	1	1	1	1	1	1	1	1	1	1	1	1
ribosomal-subunit-export-from-nucleus:1	1	1	1	1	1	1	1	1	1	1	1	1	1	1	1
ribosome-assembly:1	1	1	1	1	1	1	1	1	1	1	1	1	1	1	1
ribosome-biogenesis:1	1	1	1	1	1	1	1	1	1	1	1	1	1	1	1
ribosome-localization:1	1	1	1	1	1	1	1	1	1	1	1	1	1	1	1
small-molecule-biosynthetic-process:1	-1	-1	-1	-1	-1	-1	-1	-1	-1	1	-1	1	1	1	1
small-molecule-metabolic-process:1	-1	-1	-1	-1	-1	-1	-1	-1	-1	1	-1	1	-1	-1	1
snRNA-3'-end-processing:1	1	1	1	1	1	1	1	1	1	-1	1	-1	-1	1	1
snRNA-metabolic-process:1	1	1	1	1	1	1	1	1	1	1	1	-1	-1	1	1
snRNA-processing:1	1	1	1	1	1	1	1	1	1	-1	1	-1	-1	1	1
snoRNA-3'-end-processing:1	1	1	1	1	1	1	1	1	1	-1	1	-1	-1	1	1
snoRNA-metabolic-process:1	1	1	1	1	1	1	1	1	1	-1	1	-1	-1	1	1
snoRNA-processing:1	1	1	1	1	1	1	1	1	1	-1	-1	-1	-1	1	1
sphingolipid-metabolic-process:1	-1	-1	-1	-1	-1	-1	-1	-1	-1	-1	-1	-1	1	-1	-1
tRNA-catabolic-process:1	1	1	1	-1	1	1	1	-1	-1	-1	-1	-1	-1	1	1
tRNA-metabolic-process:1	1	1	1	1	1	1	1	1	1	1	1	-1	-1	1	1
tRNA-methylation:1	1	1	1	1	1	1	1	1	1	1	1	1	-1	1	1
tRNA-modification:1	1	1	1	1	1	1	1	1	1	1	1	-1	-1	1	1
tRNA-processing:1	1	1	1	1	1	1	1	1	1	1	1	-1	-1	1	1
tRNA-transcription:1	1	1	1	1	1	1	1	1	1	-1	1	-1	-1	1	1
tRNA-transcription-from-RNA-polymerase-III-promoter:1	1	1	1	1	1	1	1	1	1	-1	1	-1	-1	1	1
tRNA-wobble-base-modification:1	-1	1	-1	-1	-1	-1	-1	-1	-1	-1	-1	-1	-1	-1	-1
tRNA-wobble-position-uridine-thiolation:1	-1	1	-1	-1	-1	-1	-1	-1	-1	-1	-1	-1	-1	-1	-1
tRNA-wobble-uridine-modification:1	-1	1	-1	-1	-1	-1	-1	-1	-1	-1	-1	-1	-1	-1	-1
transcription-from-RNA-polymerase-I-promoter:1	1	1	1	1	1	1	1	1	1	1	1	1	-1	1	1
transcription-from-RNA-polymerase-III-promoter:1	1	1	1	1	1	1	1	1	1	-1	1	-1	-1	1	1
transcription-of-nuclear-rRNA-large-RNA-polymerase-I-transcript:1	1	1	1	1	1	1	1	1	1	1	1	1	-1	1	1
translation:1	-1	-1	-1	1	-1	1	-1	1	-1	1	-1	-1	-1	-1	-1
translational-termination:1	-1	1	-1	-1	-1	-1	-1	-1	-1	-1	-1	-1	-1	-1	-1
'de-novo'-IMP-biosynthetic-process:2	-1	-1	-1	-1	-1	-1	-1	2	2	-1	-1	-1	-1	-1	-1
'de-novo'-pyrimidine-base-biosynthetic-process:2	-1	-1	2	-1	2	-1	-1	2	2	-1	2	-1	-1	-1	-1
ATP-hydrolysis-coupled-proton-transport:2	-1	-1	-1	2	-1	-1	-1	-1	-1	-1	-1	-1	-1	-1	-1
DNA-conformation-change:2	2	-1	-1	-1	-1	-1	-1	-1	-1	-1	-1	-1	-1	-1	-1
DNA-dependent-DNA-replication:2	2	2	2	-1	-1	-1	-1	-1	-1	-1	-1	-1	-1	-1	-1
DNA-dependent-DNA-replication-initiation:2	2	2	-1	-1	-1	-1	-1	-1	-1	-1	-1	-1	-1	-1	-1
DNA-metabolic-process:2	2	2	-1	-1	-1	-1	-1	-1	-1	-1	-1	-1	-1	-1	-1
DNA-packaging:2	2	-1	-1	-1	-1	-1	-1	-1	-1	-1	-1	-1	-1	-1	-1
DNA-recombination:2	-1	2	-1	-1	-1	-1	-1	-1	-1	-1	-1	-1	-1	-1	-1
DNA-repair:2	2	2	-1	-1	-1	-1	-1	-1	-1	-1	-1	-1	-1	-1	-1
DNA-replication:2	2	2	2	-1	-1	-1	-1	-1	-1	-1	-1	-1	2	-1	-1
DNA-replication,-Okazaki-fragment-processing:2	2	2	-1	-1	-1	-1	-1	-1	-1	-1	2	-1	-1	-1	-1
DNA-replication,-removal-of-RNA-primer:2	2	2	-1	-1	-1	-1	-1	-1	-1	-1	2	-1	-1	-1	-1
DNA-replication-checkpoint:2	-1	2	2	-1	-1	-1	-1	-1	-1	-1	-1	-1	-1	-1	-1
DNA-strand-elongation:2	2	2	2	-1	-1	-1	-1	2	2	-1	2	-1	-1	-1	-1
DNA-strand-elongation-involved-in-DNA-replication:2	2	2	2	-1	-1	-1	-1	-1	2	-1	2	-1	-1	-1	2
GPI-anchor-metabolic-process:2	-1	2	-1	-1	-1	-1	-1	-1	-1	-1	-1	-1	-1	-1	-1
IMP-biosynthetic-process:2	-1	-1	-1	-1	-1	-1	-1	2	2	-1	-1	-1	-1	-1	-1
IMP-metabolic-process:2	-1	-1	-1	-1	-1	-1	-1	2	2	-1	-1	-1	-1	-1	-1
M-phase:2	2	-1	-1	-1	-1	-1	-1	-1	-1	-1	-1	-1	-1	-1	-1
M-phase-of-mitotic-cell-cycle:2	2	-1	-1	-1	-1	-1	-1	-1	-1	-1	-1	-1	-1	-1	-1
N-terminal-protein-amino-acid-modification:2	-1	-1	2	-1	2	-1	-1	2	2	-1	2	-1	-1	-1	-1
NLS-bearing-substrate-import-into-nucleus:2	2	2	2	-1	2	2	2	2	2	-1	2	-1	-1	-1	-1
RNA-3'-end-processing:2	-1	-1	2	-1	2	-1	2	2	2	-1	2	-1	-1	-1	-1
RNA-biosynthetic-process:2	2	2	-1	-1	-1	-1	-1	-1	-1	-1	-1	-1	-1	-1	-1
RNA-catabolic-process:2	2	-1	2	-1	2	2	2	2	2	-1	2	-1	2	-1	2
RNA-export-from-nucleus:2	2	2	2	-1	2	-1	2	2	2	-1	2	-1	-1	-1	-1
RNA-localization:2	2	2	2	-1	2	-1	2	2	2	-1	-1	-1	-1	-1	-1
RNA-metabolic-process:2	2	2	2	-1	2	2	-1	2	2	2	2	-1	-1	-1	2
RNA-modification:2	-1	-1	-1	-1	-1	-1	-1	2	-1	-1	-1	-1	-1	-1	-1
RNA-processing:2	-1	-1	2	-1	2	-1	-1	2	2	-1	2	-1	-1	-1	2
RNA-splicing:2	2	2	2	-1	2	2	-1	2	2	2	2	-1	-1	-1	2
RNA-splicing,-via-endonucleolytic-cleavage-and-ligation:2	-1	-1	2	-1	-1	-1	-1	-1	-1	-1	-1	-1	-1	-1	2
RNA-splicing,-via-transesterification-reactions:2	-1	2	2	-1	-1	2	-1	2	2	2	2	-1	-1	-1	-1
RNA-splicing,-via-transesterification-reactions-with-bulged-adenosine-as-nucleophile:2	-1	2	2	-1	-1	2	-1	2	2	2	2	-1	-1	-1	-1
RNA-surveillance:2	2	-1	2	-1	2	-1	-1	2	2	-1	2	-1	-1	-1	-1
RNA-transport:2	2	2	2	-1	2	2	2	2	2	-1	2	-1	-1	-1	-1
Ras-protein-signal-transduction:2	-1	-1	2	-1	-1	-1	-1	2	2	-1	-1	-1	-1	-1	-1
Rho-protein-signal-transduction:2	-1	-1	2	-1	-1	-1	-1	2	2	-1	2	-1	-1	-1	-1
SRP-dependent-cotranslational-protein-targeting-to-membrane:2	2	-1	-1	-1	-1	-1	-1	-1	-1	-1	-1	-1	-1	-1	-1
SRP-dependent-cotranslational-protein-targeting-to-membrane,-signal-sequence-recognition:2	2	-1	2	-1	2	-1	-1	2	2	-1	2	-1	-1	-1	-1
amine-biosynthetic-process:2	-1	-1	2	2	2	2	-1	2	2	-1	2	-1	2	-1	2
amine-metabolic-process:2	-1	-1	2	2	2	2	2	2	2	-1	2	-1	2	2	2
amino-acid-activation:2	-1	2	2	-1	2	2	2	2	2	2	2	-1	2	2	2
amino-acid-transport:2	-1	-1	-1	2	-1	-1	-1	-1	-1	-1	-1	-1	-1	-1	-1
arginine-metabolic-process:2	-1	-1	-1	-1	-1	-1	-1	-1	-1	-1	-1	-1	2	-1	-1
asparagine-metabolic-process:2	-1	-1	2	-1	-1	-1	-1	2	2	-1	-1	-1	-1	-1	2
aspartate-family-amino-acid-biosynthetic-process:2	-1	-1	-1	-1	2	-1	-1	2	2	-1	-1	-1	2	-1	-1
aspartate-family-amino-acid-metabolic-process:2	-1	-1	-1	2	2	-1	-1	-1	-1	-1	-1	-1	-1	-1	-1
biosynthetic-process:2	2	2	2	2	2	2	2	2	2	2	2	-1	2	2	2
box-C/D-snoRNA-metabolic-process:2	-1	-1	2	-1	2	-1	-1	-1	-1	-1	-1	-1	-1	-1	-1
box-C/D-snoRNA-processing:2	-1	-1	2	-1	2	-1	-1	-1	-1	-1	-1	-1	-1	-1	-1
carboxylic-acid-biosynthetic-process:2	-1	-1	2	2	2	-1	-1	2	2	-1	2	-1	2	-1	2
carboxylic-acid-metabolic-process:2	-1	-1	2	2	2	2	2	2	2	-1	2	-1	2	2	2
cell-cycle:2	2	2	-1	-1	-1	-1	-1	-1	-1	-1	-1	-1	-1	-1	-1
cell-cycle-phase:2	2	2	-1	-1	-1	-1	-1	-1	-1	-1	-1	-1	-1	-1	-1
cell-cycle-process:2	2	2	-1	-1	-1	-1	-1	-1	-1	-1	-1	-1	-1	-1	-1
cell-growth:2	-1	2	-1	-1	-1	-1	-1	-1	-1	-1	-1	-1	-1	-1	-1
cellular-alcohol-biosynthetic-process:2	-1	-1	-1	-1	2	-1	-1	2	2	-1	2	-1	-1	-1	-1
cellular-alcohol-metabolic-process:2	-1	-1	-1	-1	2	-1	-1	2	2	-1	2	-1	-1	-1	-1
cellular-amine-metabolic-process:2	-1	-1	2	2	2	2	2	2	2	-1	2	-1	2	2	2
cellular-amino-acid-biosynthetic-process:2	-1	-1	2	2	2	2	-1	2	2	-1	2	-1	2	-1	2
cellular-amino-acid-metabolic-process:2	-1	-1	2	2	2	2	2	2	2	-1	2	-1	2	2	2
cellular-biosynthetic-process:2	2	2	2	2	2	2	2	2	2	2	2	-1	2	2	2
cellular-component-organization:2	-1	-1	-1	-1	-1	2	2	-1	-1	-1	-1	-1	-1	-1	-1
cellular-component-organization-at-cellular-level:2	-1	-1	-1	-1	-1	2	2	-1	-1	-1	-1	-1	-1	-1	-1
cellular-component-organization-or-biogenesis:2	-1	-1	-1	-1	-1	-1	2	-1	-1	-1	-1	-1	-1	-1	-1
cellular-component-organization-or-biogenesis-at-cellular-level:2	-1	-1	-1	-1	-1	-1	2	-1	-1	-1	-1	-1	-1	-1	-1
cellular-ketone-metabolic-process:2	-1	-1	2	2	2	2	2	2	2	-1	2	-1	2	2	2
cellular-macromolecular-complex-subunit-organization:2	-1	2	-1	-1	-1	2	-1	-1	-1	-1	-1	-1	-1	-1	-1
cellular-macromolecule-biosynthetic-process:2	2	2	2	-1	2	2	2	2	2	2	2	-1	2	2	2
cellular-macromolecule-metabolic-process:2	2	2	2	-1	2	2	2	2	2	2	2	-1	-1	-1	2
cellular-metabolic-process:2	-1	-1	2	2	2	2	-1	2	2	2	2	-1	-1	-1	2
cellular-nitrogen-compound-biosynthetic-process:2	-1	-1	2	2	2	-1	-1	2	2	-1	2	-1	-1	-1	2
cellular-nitrogen-compound-metabolic-process:2	2	2	2	-1	2	-1	-1	2	2	2	2	-1	2	-1	2
cellular-process:2	-1	-1	2	-1	2	-1	2	2	2	-1	-1	-1	-1	-1	2
cellular-protein-metabolic-process:2	-1	-1	-1	-1	2	2	2	2	2	-1	2	-1	-1	2	2
cellular-respiration:2	-1	-1	-1	2	-1	-1	-1	-1	-1	-1	-1	-1	-1	-1	-1
cellular-response-to-heat:2	-1	2	-1	-1	-1	-1	-1	-1	-1	-1	-1	-1	-1	-1	2
cellular-response-to-stimulus:2	2	2	-1	-1	-1	-1	-1	-1	-1	-1	-1	-1	-1	-1	-1
cellular-response-to-stress:2	2	2	-1	-1	-1	-1	-1	-1	-1	-1	-1	-1	-1	-1	-1
chromatin-assembly:2	2	-1	-1	-1	-1	-1	-1	-1	-1	-1	-1	-1	-1	-1	-1
chromatin-assembly-or-disassembly:2	2	-1	-1	-1	-1	-1	-1	-1	-1	-1	-1	-1	-1	-1	-1
chromatin-modification:2	2	-1	-1	-1	-1	-1	-1	-1	-1	-1	-1	-1	-1	-1	-1
chromatin-organization:2	2	2	-1	-1	-1	-1	-1	-1	-1	-1	-1	-1	-1	-1	-1
chromatin-silencing:2	2	2	-1	-1	-1	-1	2	-1	-1	-1	-1	-1	-1	-1	-1
chromatin-silencing-at-silent-mating-type-cassette:2	2	2	-1	-1	-1	-1	-1	-1	-1	-1	-1	-1	-1	-1	-1
chromatin-silencing-at-telomere:2	2	2	2	-1	-1	-1	2	-1	-1	-1	-1	-1	-1	-1	-1
chromosome-organization:2	2	2	-1	-1	-1	-1	-1	-1	-1	-1	-1	-1	-1	-1	-1
chromosome-segregation:2	2	2	-1	-1	-1	-1	-1	-1	-1	-1	-1	-1	-1	-1	-1
cofactor-biosynthetic-process:2	-1	-1	-1	2	-1	-1	-1	-1	-1	-1	-1	-1	-1	-1	-1
cofactor-metabolic-process:2	-1	-1	-1	2	-1	-1	-1	-1	-1	-1	-1	-1	-1	-1	-1
cytokinetic-cell-separation:2	-1	-1	-1	-1	-1	-1	-1	-1	-1	-1	-1	-1	-1	-1	2
cytoskeleton-dependent-intracellular-transport:2	2	-1	-1	-1	-1	-1	-1	-1	-1	-1	-1	-1	-1	-1	-1
double-strand-break-repair:2	2	-1	-1	-1	-1	-1	-1	-1	-1	-1	-1	-1	-1	-1	-1
double-strand-break-repair-via-break-induced-replication:2	-1	2	-1	-1	-1	-1	-1	-1	-1	-1	-1	-1	-1	-1	-1
double-strand-break-repair-via-homologous-recombination:2	2	-1	-1	-1	-1	-1	-1	-1	-1	-1	-1	-1	-1	-1	-1
electron-transport-chain:2	-1	-1	-1	2	-1	-1	-1	-1	-1	2	-1	-1	-1	-1	-1
energy-coupled-proton-transport,-against-electrochemical-gradient:2	-1	-1	-1	2	-1	-1	-1	-1	-1	-1	-1	-1	-1	-1	-1
ergosterol-biosynthetic-process:2	-1	-1	-1	-1	2	-1	-1	2	2	-1	2	-1	-1	-1	-1
ergosterol-metabolic-process:2	-1	-1	-1	-1	2	-1	-1	2	2	-1	2	-1	-1	-1	-1
establishment-of-RNA-localization:2	2	2	2	-1	2	2	2	2	2	-1	2	-1	-1	-1	-1
establishment-of-protein-localization-in-mitochondrion:2	-1	-1	-1	-1	2	2	-1	2	2	-1	2	-1	-1	-1	2
exonucleolytic-nuclear-transcribed-mRNA-catabolic-process-involved-in-deadenylation-dependent-decay:2	2	-1	2	-1	2	-1	-1	2	2	2	2	-1	-1	-1	-1
exonucleolytic-trimming-involved-in-rRNA-processing:2	-1	-1	-1	-1	-1	-1	-1	2	-1	-1	-1	-1	-1	-1	-1
exonucleolytic-trimming-to-generate-mature-3'-end-of-5.8S-rRNA-from-tricistronic-rRNA-transcript-(SSU-rRNA,-5.8S-rRNA,-LSU-rRNA):2	-1	-1	-1	-1	-1	-1	-1	-1	-1	-1	-1	-1	-1	-1
filamentous-growth:2	-1	2	-1	-1	-1	-1	-1	-1	-1	-1	-1	-1	-1	-1	-1
filamentous-growth-of-a-population-of-unicellular-organisms:2	-1	2	-1	-1	-1	-1	-1	-1	-1	-1	-1	-1	-1	-1	-1
folic-acid-containing-compound-biosynthetic-process:2	-1	-1	-1	-1	-1	-1	-1	-1	-1	-1	-1	-1	-1	2	-1
folic-acid-containing-compound-metabolic-process:2	-1	-1	-1	-1	-1	-1	-1	-1	-1	-1	-1	-1	-1	2	-1
gene-expression:2	2	2	2	2	2	2	2	2	2	2	2	-1	-1	-1	2
gene-silencing:2	2	2	-1	-1	-1	-1	2	-1	-1	-1	-1	-1	-1	-1	-1
glutamine-family-amino-acid-metabolic-process:2	-1	-1	-1	-1	2	-1	-1	-1	-1	-1	-1	-1	-1	-1	-1
glutamine-metabolic-process:2	-1	-1	-1	-1	2	-1	-1	-1	-1	-1	-1	-1	-1	-1	-1
glycoprotein-biosynthetic-process:2	-1	-1	-1	-1	-1	-1	-1	-1	-1	-1	-1	-1	2	-1	-1
glycoprotein-metabolic-process:2	-1	-1	-1	-1	-1	-1	-1	-1	-1	-1	-1	-1	2	-1	-1
glycosylation:2	-1	-1	-1	-1	-1	-1	-1	-1	-1	-1	-1	-1	2	-1	-1
growth:2	-1	2	-1	-1	-1	-1	-1	-1	-1	-1	-1	-1	-1	-1	-1
growth-of-unicellular-organism-as-a-thread-of-attached-cells:2	-1	2	-1	-1	-1	-1	-1	-1	-1	-1	-1	-1	-1	-1	-1
heterocycle-metabolic-process:2	-1	-1	-1	2	-1	-1	-1	-1	-1	-1	-1	-1	-1	-1	-1
histone-methylation:2	-1	2	-1	-1	-1	-1	2	-1	-1	-1	-1	-1	-1	-1	-1
inositolphosphoceramide-metabolic-process:2	-1	-1	2	-1	-1	-1	-1	-1	-1	-1	-1	-1	-1	-1	-1
intracellular-protein-transmembrane-transport:2	-1	-1	-1	-1	2	-1	-1	-1	-1	-1	-1	-1	-1	-1	2
intronic-box-C/D-snoRNA-processing:2	-1	-1	2	-1	2	-1	-1	-1	-1	-1	-1	-1	-1	-1	-1
intronic-snoRNA-processing:2	-1	-1	2	-1	2	-1	-1	-1	-1	-1	-1	-1	-1	-1	-1
lagging-strand-elongation:2	2	2	2	-1	-1	-1	-1	2	2	-1	2	-1	-1	-1	2
leading-strand-elongation:2	2	2	2	-1	-1	-1	-1	-1	-1	-1	-1	-1	-1	-1	-1
lipid-biosynthetic-process:2	-1	-1	-1	2	-1	-1	-1	-1	-1	-1	-1	-1	-1	-1	-1
mRNA-3'-end-processing:2	-1	2	-1	-1	-1	-1	-1	-1	-1	-1	-1	-1	-1	-1	-1
mRNA-binding-(hnRNP)-protein-import-into-nucleus:2	2	2	2	-1	2	2	2	2	2	-1	2	-1	-1	-1	2
mRNA-catabolic-process:2	2	-1	2	-1	2	2	2	2	2	-1	2	-1	-1	-1	2
mRNA-cleavage:2	-1	-1	2	-1	2	-1	-1	2	2	-1	2	-1	-1	-1	-1
mRNA-export-from-nucleus:2	2	2	2	-1	2	2	2	2	2	-1	2	-1	-1	-1	-1
mRNA-export-from-nucleus-in-response-to-heat-stress:2	-1	2	-1	-1	2	-1	2	-1	-1	-1	2	-1	-1	-1	2
mRNA-metabolic-process:2	2	2	2	-1	2	2	2	2	2	2	2	-1	-1	-1	2
mRNA-processing:2	2	2	2	-1	2	2	-1	2	2	2	2	2	-1	-1	2
mRNA-transport:2	2	2	2	-1	2	2	2	2	2	-1	2	-1	-1	-1	-1
macromolecular-complex-subunit-organization:2	-1	-1	-1	-1	-1	2	-1	-1	-1	-1	-1	-1	-1	-1	-1
macromolecule-biosynthetic-process:2	2	2	2	-1	2	2	2	2	2	2	2	-1	2	2	2
macromolecule-glycosylation:2	-1	-1	-1	-1	-1	-1	-1	-1	-1	-1	-1	-1	2	-1	-1
macromolecule-metabolic-process:2	2	2	2	-1	2	2	2	2	2	-1	2	-1	-1	-1	2
macromolecule-methylation:2	-1	-1	-1	-1	-1	-1	2	-1	-1	-1	-1	-1	-1	-1	-1
maintenance-of-DNA-repeat-elements:2	-1	2	-1	-1	-1	-1	-1	-1	-1	-1	-1	-1	-1	-1	-1
metabolic-process:2	-1	-1	2	2	2	-1	-1	2	2	2	2	-1	-1	-1	2
metal-ion-transport:2	-1	-1	-1	-1	-1	-1	-1	-1	-1	-1	-1	-1	-1	2	-1
methylation:2	-1	-1	-1	-1	-1	-1	2	-1	-1	-1	-1	-1	-1	-1	-1
microtubule-based-movement:2	2	-1	-1	-1	-1	-1	-1	-1	-1	-1	-1	-1	-1	-1	-1
microtubule-based-process:2	2	-1	-1	-1	-1	-1	-1	-1	-1	-1	-1	-1	-1	-1	-1
microtubule-based-transport:2	2	-1	-1	-1	-1	-1	-1	-1	-1	-1	-1	-1	-1	-1	-1
microtubule-nucleation:2	-1	-1	-1	-1	-1	2	-1	-1	-1	-1	-1	-1	-1	-1	-1
microtubule-organizing-center-organization:2	-1	-1	-1	-1	-1	2	-1	-1	-1	-1	-1	-1	-1	-1	-1
mismatch-repair:2	-1	2	-1	-1	-1	-1	-1	-1	-1	-1	-1	-1	-1	-1	-1
mitochondrial-RNA-metabolic-process:2	-1	-1	-1	-1	2	-1	-1	-1	-1	-1	-1	-1	-1	-1	-1
mitochondrial-electron-transport,-cytochrome-c-to-oxygen:2	-1	-1	-1	2	-1	-1	-1	-1	-1	-1	-1	-1	-1	-1	-1
mitochondrial-proton-transporting-ATP-synthase-complex-assembly:2	-1	-1	-1	-1	-1	2	2	-1	-1	-1	-1	-1	-1	-1	-1
mitochondrial-translation:2	-1	-1	-1	2	2	2	2	2	2	2	2	-1	-1	-1	2
mitochondrial-translational-initiation:2	-1	-1	-1	-1	-1	-1	2	-1	-1	-1	-1	-1	-1	-1	-1
mitochondrial-transport:2	-1	-1	-1	-1	2	2	-1	2	2	-1	2	-1	-1	-1	-1
mitochondrion-organization:2	-1	-1	-1	2	2	2	2	2	2	2	2	-1	-1	-1	2
mitosis:2	2	-1	-1	-1	-1	-1	-1	-1	-1	-1	-1	-1	-1	-1	-1
mitotic-cell-cycle:2	2	2	-1	-1	-1	-1	-1	-1	-1	-1	-1	-1	-1	-1	-1
mitotic-sister-chromatid-cohesion:2	2	-1	-1	-1	-1	-1	-1	-1	-1	-1	-1	-1	-1	-1	-1
mitotic-sister-chromatid-segregation:2	2	-1	-1	-1	-1	-1	-1	-1	-1	-1	-1	-1	-1	-1	-1
mitotic-spindle-organization:2	2	-1	-1	-1	-1	-1	-1	-1	-1	-1	-1	-1	-1	-1	-1
monovalent-inorganic-cation-transport:2	-1	-1	-1	2	-1	-1	-1	-1	-1	-1	-1	-1	-1	-1	-1
ncRNA-3'-end-processing:2	-1	-1	2	-1	2	-1	-1	2	2	-1	2	-1	-1	-1	-1
ncRNA-catabolic-process:2	-1	-1	2	-1	-1	-1	-1	-1	-1	2	-1	-1	-1	-1	-1
ncRNA-metabolic-process:2	-1	-1	2	-1	2	-1	-1	2	2	-1	-1	-1	-1	-1	2
ncRNA-processing:2	-1	-1	2	-1	-1	-1	-1	-1	-1	-1	-1	-1	-1	-1	-1
negative-regulation-of-G2/M-transition-of-mitotic-cell-cycle:2	-1	2	2	-1	-1	-1	-1	-1	-1	-1	-1	-1	-1	-1	-1
negative-regulation-of-RNA-metabolic-process:2	2	2	-1	-1	-1	-1	2	-1	-1	-1	-1	-1	-1	-1	-1
negative-regulation-of-biological-process:2	2	-1	-1	-1	-1	-1	-1	-1	-1	-1	-1	-1	-1	-1	-1
negative-regulation-of-biosynthetic-process:2	2	2	-1	-1	-1	-1	2	-1	-1	-1	-1	-1	-1	-1	-1
negative-regulation-of-cellular-biosynthetic-process:2	2	2	-1	-1	-1	-1	2	-1	-1	-1	-1	-1	-1	-1	-1
negative-regulation-of-cellular-macromolecule-biosynthetic-process:2	2	2	-1	-1	-1	-1	2	-1	-1	-1	-1	-1	-1	-1	-1
negative-regulation-of-cellular-metabolic-process:2	2	2	-1	-1	-1	-1	-1	-1	-1	-1	-1	-1	-1	-1	-1
negative-regulation-of-cellular-process:2	2	-1	-1	-1	-1	-1	-1	-1	-1	-1	-1	-1	-1	-1	-1
negative-regulation-of-gene-expression:2	2	2	-1	-1	-1	-1	2	-1	-1	-1	-1	-1	-1	-1	-1
negative-regulation-of-gene-expression,-epigenetic:2	2	2	-1	-1	-1	-1	2	-1	-1	-1	-1	-1	-1	-1	-1
negative-regulation-of-macromolecule-biosynthetic-process:2	2	2	-1	-1	-1	-1	2	-1	-1	-1	-1	-1	-1	-1	-1
negative-regulation-of-macromolecule-metabolic-process:2	2	2	-1	-1	-1	-1	2	-1	-1	-1	-1	-1	-1	-1	-1
negative-regulation-of-metabolic-process:2	2	2	-1	-1	-1	-1	-1	-1	-1	-1	-1	-1	-1	-1	-1
negative-regulation-of-mitotic-cell-cycle:2	-1	2	2	-1	-1	-1	-1	-1	-1	-1	-1	-1	-1	-1	-1
negative-regulation-of-nitrogen-compound-metabolic-process:2	2	2	-1	-1	-1	-1	2	-1	-1	-1	-1	-1	-1	-1	-1
negative-regulation-of-nucleobase,-nucleoside,-nucleotide-and-nucleic-acid-metabolic-process:2	2	2	-1	-1	-1	-1	2	-1	-1	-1	-1	-1	-1	-1	-1
negative-regulation-of-transcription,-DNA-dependent:2	2	2	-1	-1	-1	-1	2	-1	-1	-1	-1	-1	-1	-1	-1
negative-regulation-of-translation:2	-1	2	-1	-1	-1	-1	-1	-1	-1	-1	-1	-1	-1	-1	-1
nitrogen-compound-metabolic-process:2	2	2	2	-1	2	-1	-1	2	2	2	2	-1	2	-1	2
nonfunctional-rRNA-decay:2	2	-1	2	-1	-1	-1	-1	2	2	2	-1	-1	-1	-1	-1
nuclear-RNA-surveillance:2	2	-1	2	-1	2	-1	-1	2	2	-1	2	-1	-1	-1	-1
nuclear-division:2	2	-1	-1	-1	-1	-1	-1	-1	-1	-1	-1	-1	-1	-1	-1
nuclear-export:2	2	2	2	-1	2	-1	2	-1	-1	-1	-1	-1	-1	-1	-1
nuclear-import:2	2	2	2	-1	2	2	2	2	2	-1	2	-1	-1	-1	-1
nuclear-mRNA-splicing,-via-spliceosome:2	-1	2	2	-1	-1	2	-1	2	2	2	2	-1	-1	-1	-1
nuclear-migration-along-microtubule:2	2	-1	-1	-1	-1	-1	-1	-1	-1	-1	-1	-1	-1	-1	-1
nuclear-ncRNA-surveillance:2	-1	-1	2	-1	2	-1	-1	2	2	2	2	-1	-1	-1	-1
nuclear-polyadenylation-dependent-mRNA-catabolic-process:2	-1	-1	2	-1	2	-1	2	2	2	2	2	-1	-1	-1	-1
nuclear-polyadenylation-dependent-ncRNA-catabolic-process:2	-1	-1	2	-1	2	-1	-1	2	2	2	2	-1	-1	-1	-1
nuclear-polyadenylation-dependent-rRNA-catabolic-process:2	-1	-1	2	-1	-1	-1	-1	-1	-1	-1	-1	-1	-1	-1	-1
nuclear-polyadenylation-dependent-tRNA-catabolic-process:2	-1	-1	2	-1	2	-1	2	2	2	2	2	-1	-1	-1	-1
nuclear-pore-distribution:2	-1	-1	-1	-1	-1	-1	2	-1	-1	-1	2	-1	-1	-1	-1
nuclear-pore-localization:2	-1	-1	-1	-1	-1	-1	2	-1	-1	-1	2	-1	-1	-1	-1
nuclear-pore-organization:2	2	2	2	-1	2	2	2	2	2	-1	2	-1	-1	-1	2
nuclear-transcribed-mRNA-catabolic-process:2	2	-1	2	-1	2	2	2	2	2	-1	2	-1	-1	-1	2
nuclear-transcribed-mRNA-catabolic-process,-3'-5'-exonucleolytic-nonsense-mediated-decay:2	2	-1	2	-1	2	-1	-1	2	2	2	2	-1	-1	-1	-1
nuclear-transcribed-mRNA-catabolic-process,-deadenylation-dependent-decay:2	2	-1	2	-1	2	-1	-1	2	2	2	2	-1	-1	-1	-1
nuclear-transcribed-mRNA-catabolic-process,-exonucleolytic:2	2	-1	2	-1	2	-1	2	2	2	2	2	-1	-1	-1	-1
nuclear-transcribed-mRNA-catabolic-process,-exonucleolytic,-3'-5':2	2	-1	2	-1	2	-1	-1	2	2	2	2	-1	-1	-1	-1
nuclear-transcribed-mRNA-catabolic-process,-nonsense-mediated-decay:2	2	-1	2	-1	-1	-1	-1	-1	-1	-1	2	-1	-1	-1	-1
nuclear-transcribed-mRNA-poly(A)-tail-shortening:2	-1	-1	-1	-1	-1	-1	-1	-1	-1	-1	-1	-1	2	-1	-1
nuclear-transport:2	2	2	2	-1	2	-1	2	2	2	-1	-1	-1	-1	-1	-1
nucleic-acid-metabolic-process:2	2	2	2	-1	-1	-1	-1	-1	-1	2	-1	-1	-1	-1	-1
nucleic-acid-transport:2	2	2	2	-1	2	2	2	2	2	-1	2	-1	-1	-1	-1
nucleobase,-nucleoside,-nucleotide-and-nucleic-acid-metabolic-process:2	2	2	2	-1	-1	-1	-1	-1	-1	2	2	-1	-1	-1	-1
nucleobase,-nucleoside,-nucleotide-and-nucleic-acid-transport:2	2	2	2	-1	2	2	2	2	2	-1	2	-1	-1	-1	-1
nucleobase-biosynthetic-process:2	-1	-1	2	-1	2	-1	-1	-1	2	-1	2	-1	-1	-1	-1
nucleobase-metabolic-process:2	-1	-1	-1	-1	2	-1	-1	-1	-1	-1	-1	-1	-1	-1	-1
nucleocytoplasmic-transport:2	2	2	2	-1	2	-1	2	2	2	-1	-1	-1	-1	-1	-1
nucleoside-metabolic-process:2	-1	-1	-1	-1	2	-1	-1	2	2	-1	-1	-1	-1	-1	-1
nucleosome-assembly:2	2	-1	-1	-1	-1	-1	-1	-1	-1	-1	-1	-1	-1	-1	-1
nucleotide-excision-repair:2	-1	2	-1	-1	-1	-1	-1	-1	-1	-1	-1	-1	-1	-1	-1
nucleus-organization:2	2	2	2	-1	2	2	2	-1	-1	-1	2	-1	-1	-1	2
organelle-fission:2	2	-1	-1	-1	-1	-1	-1	-1	-1	-1	-1	-1	-1	-1	-1
organelle-organization:2	-1	-1	-1	-1	-1	2	2	-1	-1	-1	-1	-1	-1	-1	-1
organelle-transport-along-microtubule:2	2	-1	-1	-1	-1	-1	-1	-1	-1	-1	-1	-1	-1	-1	-1
organic-acid-biosynthetic-process:2	-1	-1	2	2	2	-1	-1	2	2	-1	2	-1	2	-1	2
organic-acid-metabolic-process:2	-1	-1	2	2	2	2	2	2	2	-1	2	-1	2	2	2
oxidation-reduction-process:2	-1	-1	-1	2	-1	-1	-1	-1	-1	-1	-1	-1	-1	-1	-1
oxoacid-metabolic-process:2	-1	-1	2	2	2	2	2	2	2	-1	2	-1	2	2	2
phytosteroid-biosynthetic-process:2	-1	-1	-1	-1	2	-1	-1	2	2	-1	2	-1	-1	-1	-1
phytosteroid-metabolic-process:2	-1	-1	-1	-1	2	-1	-1	2	2	-1	2	-1	-1	-1	-1
poly(A)+-mRNA-export-from-nucleus:2	2	2	2	-1	2	-1	2	2	2	-1	2	-1	-1	-1	-1
polyadenylation-dependent-RNA-catabolic-process:2	-1	-1	2	-1	2	-1	-1	2	2	2	2	-1	-1	-1	-1
polyadenylation-dependent-mRNA-catabolic-process:2	-1	-1	2	-1	2	-1	2	2	2	2	2	-1	-1	-1	-1
polyadenylation-dependent-ncRNA-catabolic-process:2	-1	-1	2	-1	2	-1	-1	2	2	2	2	-1	-1	-1	-1
polyadenylation-dependent-snoRNA-3'-end-processing:2	-1	-1	2	-1	2	-1	2	2	2	2	2	-1	-1	-1	-1
positive-regulation-of-translation:2	-1	-1	-1	-1	-1	-1	-1	-1	-1	-1	-1	-1	-1	-1	2
posttranscriptional-regulation-of-gene-expression:2	2	2	2	-1	2	2	2	2	2	-1	2	-1	-1	-1	2
posttranscriptional-tethering-of-RNA-polymerase-II-gene-DNA-at-nuclear-periphery:2	-1	-1	-1	-1	-1	-1	2	-1	-1	-1	2	-1	-1	-1	-1
pre-replicative-complex-assembly:2	-1	2	-1	-1	-1	-1	-1	-1	-1	-1	-1	-1	-1	-1	-1
primary-metabolic-process:2	2	2	2	-1	2	2	2	2	2	-1	2	-1	2	-1	2
protein-DNA-complex-assembly:2	2	2	-1	-1	-1	-1	-1	-1	-1	-1	-1	-1	-1	-1	-1
protein-DNA-complex-subunit-organization:2	2	2	-1	-1	-1	-1	-1	-1	-1	-1	-1	-1	-1	-1	-1
protein-N-linked-glycosylation:2	-1	-1	-1	-1	-1	-1	-1	-1	-1	-1	-1	-1	2	-1	-1
protein-alkylation:2	-1	2	-1	-1	-1	-1	-1	-1	-1	-1	-1	-1	-1	-1	-1
protein-export-from-nucleus:2	2	2	-1	-1	-1	-1	2	-1	-1	-1	-1	-1	-1	-1	-1
protein-glycosylation:2	-1	-1	-1	-1	-1	-1	-1	-1	-1	-1	-1	-1	2	-1	-1
protein-import:2	2	2	2	-1	2	2	2	2	2	-1	2	-1	-1	-1	2
protein-import-into-mitochondrial-inner-membrane:2	-1	-1	-1	-1	-1	-1	2	-1	-1	-1	-1	-1	-1	-1	-1
protein-import-into-mitochondrial-matrix:2	-1	-1	2	-1	2	2	-1	2	2	-1	2	-1	-1	-1	2
protein-import-into-nucleus:2	2	2	2	-1	2	2	2	2	2	-1	2	-1	-1	-1	-1
protein-localization-in-mitochondrion:2	-1	-1	-1	-1	2	2	-1	2	2	-1	2	-1	-1	-1	2
protein-localization-to-nucleus:2	2	2	2	-1	2	2	2	2	-1	-1	2	-1	-1	-1	-1
protein-metabolic-process:2	-1	-1	-1	-1	2	2	2	2	2	-1	2	-1	-1	2	2
protein-methylation:2	-1	2	-1	-1	-1	-1	-1	-1	-1	-1	-1	-1	-1	-1	-1
protein-targeting-to-mitochondrion:2	-1	-1	-1	-1	2	2	-1	2	2	-1	2	-1	-1	-1	2
protein-transmembrane-transport:2	-1	-1	-1	-1	2	-1	-1	-1	-1	-1	-1	-1	-1	-1	2
proton-transport:2	-1	-1	-1	2	-1	-1	-1	-1	-1	-1	-1	-1	-1	-1	-1
proton-transporting-ATP-synthase-complex-assembly:2	-1	-1	-1	-1	-1	2	2	-1	-1	-1	-1	-1	-1	-1	-1
proton-transporting-ATP-synthase-complex-biogenesis:2	-1	-1	-1	-1	-1	2	2	-1	-1	-1	-1	-1	-1	-1	-1
proton-transporting-two-sector-ATPase-complex-assembly:2	-1	-1	-1	-1	2	2	-1	-1	-1	-1	-1	-1	-1	-1	-1
pseudohyphal-growth:2	-1	2	-1	-1	-1	-1	-1	-1	-1	-1	-1	-1	-1	-1	-1
pteridine-containing-compound-biosynthetic-process:2	-1	-1	-1	-1	-1	-1	-1	-1	-1	-1	-1	-1	-1	2	-1
pteridine-containing-compound-metabolic-process:2	-1	-1	-1	-1	-1	-1	-1	-1	-1	-1	-1	-1	-1	2	-1
pyrimidine-base-biosynthetic-process:2	-1	-1	2	-1	2	-1	-1	-1	2	-1	-1	-1	-1	-1	-1
pyrimidine-base-metabolic-process:2	-1	-1	2	-1	2	-1	-1	-1	2	-1	-1	-1	-1	-1	-1
pyrimidine-containing-compound-biosynthetic-process:2	-1	-1	2	-1	2	-1	-1	2	2	-1	2	-1	-1	-1	-1
pyrimidine-containing-compound-metabolic-process:2	-1	-1	2	-1	2	-1	-1	2	2	-1	-1	-1	-1	-1	-1
pyrimidine-nucleoside-metabolic-process:2	-1	-1	-1	-1	2	-1	-1	-1	-1	-1	-1	-1	-1	-1	-1
pyrimidine-nucleotide-biosynthetic-process:2	-1	-1	2	-1	2	-1	-1	2	2	-1	2	-1	-1	-1	-1
pyrimidine-nucleotide-metabolic-process:2	-1	-1	2	-1	2	-1	-1	2	2	-1	2	-1	-1	-1	2
pyrimidine-ribonucleoside-metabolic-process:2	-1	-1	-1	-1	2	-1	-1	-1	-1	-1	-1	-1	-1	-1	-1
rRNA-3'-end-processing:2	-1	-1	-1	-1	-1	-1	-1	2	-1	-1	-1	-1	-1	-1	-1
rRNA-catabolic-process:2	-1	-1	2	-1	-1	-1	-1	-1	-1	2	-1	-1	-1	-1	-1
rRNA-export-from-nucleus:2	2	2	2	-1	2	2	2	2	2	-1	2	-1	-1	-1	2
rRNA-transport:2	2	2	2	-1	2	2	2	2	2	-1	2	-1	-1	-1	2
recombinational-repair:2	2	-1	-1	-1	-1	-1	-1	-1	-1	-1	-1	-1	-1	-1	-1
regulation-of-RNA-metabolic-process:2	2	2	-1	-1	-1	-1	-1	-1	-1	-1	-1	-1	-1	-1	-1
regulation-of-anatomical-structure-size:2	-1	2	-1	-1	-1	-1	-1	-1	-1	-1	-1	-1	-1	-1	-1
regulation-of-biosynthetic-process:2	2	2	-1	-1	-1	-1	-1	-1	-1	-1	-1	-1	-1	-1	-1
regulation-of-cell-size:2	-1	2	-1	-1	-1	-1	-1	-1	-1	-1	-1	-1	-1	-1	-1
regulation-of-cellular-biosynthetic-process:2	2	2	-1	-1	-1	-1	-1	-1	-1	-1	-1	-1	-1	-1	-1
regulation-of-cellular-component-size:2	-1	2	-1	-1	-1	-1	-1	-1	-1	-1	-1	-1	-1	-1	-1
regulation-of-cellular-macromolecule-biosynthetic-process:2	2	2	-1	-1	-1	-1	-1	-1	-1	-1	-1	-1	-1	-1	-1
regulation-of-cellular-metabolic-process:2	2	2	-1	-1	-1	-1	-1	-1	-1	-1	-1	-1	-1	-1	-1
regulation-of-cellular-process:2	2	2	-1	-1	-1	-1	-1	-1	-1	-1	-1	-1	-1	-1	-1
regulation-of-cellular-protein-metabolic-process:2	2	2	2	-1	-1	-1	2	2	2	-1	2	-1	-1	-1	2
regulation-of-gene-expression:2	2	2	-1	-1	-1	-1	-1	-1	-1	-1	-1	-1	-1	-1	-1
regulation-of-gene-expression,-epigenetic:2	2	2	-1	-1	-1	-1	-1	-1	-1	-1	-1	-1	-1	-1	-1
regulation-of-macromolecule-biosynthetic-process:2	2	2	-1	-1	-1	-1	-1	-1	-1	-1	-1	-1	-1	-1	-1
regulation-of-macromolecule-metabolic-process:2	2	2	-1	-1	-1	-1	-1	-1	-1	-1	-1	-1	-1	-1	-1
regulation-of-metabolic-process:2	2	2	-1	-1	-1	-1	-1	-1	-1	-1	-1	-1	-1	-1	-1
regulation-of-mitochondrion-organization:2	-1	-1	-1	-1	-1	2	-1	-1	-1	-1	-1	-1	-1	-1	-1
regulation-of-nitrogen-compound-metabolic-process:2	2	2	-1	-1	-1	-1	-1	-1	-1	-1	-1	-1	-1	-1	-1
regulation-of-nucleobase,-nucleoside,-nucleotide-and-nucleic-acid-metabolic-process:2	2	2	-1	-1	-1	-1	-1	-1	-1	-1	-1	-1	-1	-1	-1
regulation-of-primary-metabolic-process:2	2	2	-1	-1	-1	-1	-1	-1	-1	-1	-1	-1	-1	-1	-1
regulation-of-protein-metabolic-process:2	2	2	2	-1	-1	-1	2	-1	2	-1	2	-1	-1	-1	2
regulation-of-transcription,-DNA-dependent:2	2	2	-1	-1	-1	-1	-1	-1	-1	-1	-1	-1	-1	-1	-1
regulation-of-translation:2	2	2	2	-1	2	2	2	2	2	-1	2	-1	-1	-1	2
regulation-of-translational-elongation:2	2	2	2	-1	2	-1	-1	2	2	-1	2	-1	-1	-1	2
regulation-of-translational-fidelity:2	2	-1	-1	-1	-1	-1	-1	-1	-1	-1	-1	-1	-1	-1	-1
regulation-of-translational-initiation:2	2	2	2	2	2	2	-1	2	2	-1	2	-1	-1	-1	2
response-to-DNA-damage-stimulus:2	2	2	-1	-1	-1	-1	-1	-1	-1	-1	-1	-1	-1		-1	-1
response-to-stress:2	2	2	-1	-1	-1	-1	-1	-1	-1	-1	-1	-1	-1	-1	-1
ribonucleoside-metabolic-process:2	-1	-1	-1	-1	2	-1	-1	2	2	-1	-1	-1	-1	-1	-1
ribonucleoside-monophosphate-biosynthetic-process:2	-1	-1	-1	-1	-1	-1	-1	-1	2	-1	-1	-1	-1	-1	-1
ribonucleoside-monophosphate-metabolic-process:2	-1	-1	-1	-1	-1	-1	-1	-1	2	-1	-1	-1	-1	-1	-1
ribosomal-protein-import-into-nucleus:2	2	2	2	-1	2	2	2	2	2	-1	2	-1	-1	-1	2
sister-chromatid-cohesion:2	2	-1	-1	-1	-1	-1	-1	-1	-1	-1	-1	-1	-1	-1	-1
sister-chromatid-segregation:2	2	-1	-1	-1	-1	-1	-1	-1	-1	-1	-1	-1	-1	-1	-1
small-GTPase-mediated-signal-transduction:2	-1	-1	2	-1	-1	-1	-1	-1	-1	-1	-1	-1	-1	-1	-1
small-molecule-biosynthetic-process:2	-1	-1	2	2	2	2	-1	2	2	-1	2	-1	2	-1	2
small-molecule-metabolic-process:2	-1	-1	-1	2	2	2	-1	2	2	2	2	-1	2	-1	2
snRNA-export-from-nucleus:2	2	2	2	-1	2	2	2	2	2	-1	2	-1	-1	-1	2
snRNA-processing:2	-1	-1	-1	-1	-1	-1	-1	2	-1	-1	-1	-1	-1	-1	-1
snRNA-transport:2	2	2	2	-1	2	2	2	2	2	-1	2	-1	-1	-1	2
snRNP-protein-import-into-nucleus:2	2	2	2	-1	2	2	2	2	2	-1	2	-1	-1	-1	2
snoRNA-3'-end-processing:2	-1	-1	2	-1	2	-1	2	2	2	-1	2	-1	-1	-1	-1
snoRNA-metabolic-process:2	2	-1	2	-1	2	-1	2	2	2	2	2	-1	-1	-1	-1
snoRNA-processing:2	2	-1	2	-1	2	-1	2	2	2	2	2	-1	-1	-1	-1
spindle-pole-body-organization:2	-1	-1	-1	-1	-1	2	-1	-1	-1	-1	-1	-1	-1	-1	-1
spliceosomal-conformational-changes-to-generate-catalytic-conformation:2	-1	2	-1	-1	-1	-1	-1	-1	-1	-1	-1	-1	-1	-1	-1
steroid-biosynthetic-process:2	-1	-1	-1	-1	2	-1	-1	2	2	-1	2	-1	-1	-1	-1
steroid-metabolic-process:2	-1	-1	-1	-1	2	-1	-1	-1	2	-1	-1	-1	-1	-1	-1
sterol-biosynthetic-process:2	-1	-1	-1	-1	2	-1	-1	2	2	-1	2	-1	-1	-1	-1
sterol-metabolic-process:2	-1	-1	-1	-1	2	-1	-1	-1	2	-1	-1	-1	-1	-1	-1
tRNA-aminoacylation:2	-1	2	2	-1	2	2	2	2	2	2	2	-1	2	2	2
tRNA-aminoacylation-for-protein-translation:2	-1	2	2	-1	2	2	2	2	2	2	2	-1	2	-1	2
tRNA-catabolic-process:2	-1	-1	2	-1	2	-1	2	2	2	2	2	-1	-1	-1	-1
tRNA-export-from-nucleus:2	2	2	2	-1	2	-1	2	2	2	-1	2	-1	-1	-1	-1
tRNA-metabolic-process:2	2	-1	2	2	2	2	2	2	2	2	2	-1	-1	-1	2
tRNA-modification:2	2	-1	2	2	2	-1	-1	2	2	-1	-1	-1	-1	-1	-1
tRNA-processing:2	2	-1	2	2	2	-1	2	2	2	2	2	-1	-1	-1	2
tRNA-splicing,-via-endonucleolytic-cleavage-and-ligation:2	-1	-1	2	-1	-1	-1	-1	-1	-1	-1	-1	-1	-1	-1	2
tRNA-thio-modification:2	-1	-1	-1	2	-1	-1	-1	-1	-1	-1	-1	-1	-1	-1	-1
tRNA-transport:2	2	2	2	-1	2	2	2	2	2	-1	-1	-1	-1	-1	-1
tRNA-wobble-base-modification:2	-1	-1	-1	2	-1	-1	-1	-1	-1	-1	-1	-1	-1	-1	-1
tRNA-wobble-uridine-modification:2	-1	-1	-1	2	-1	-1	-1	-1	-1	-1	-1	-1	-1	-1	-1
termination-of-RNA-polymerase-II-transcription:2	-1	-1	2	-1	-1	-1	-1	-1	-1	-1	-1	-1	-1	-1	-1
termination-of-RNA-polymerase-II-transcription,-poly(A)-coupled:2	-1	-1	-1	-1	-1	-1	-1	-1	-1	-1	-1	-1	-1	-1	2
threonine-biosynthetic-process:2	-1	-1	-1	-1	-1	2	-1	-1	-1	-1	-1	-1	-1	-1	-1
transcription,-DNA-dependent:2	2	2	-1	-1	-1	-1	-1	-1	-1	-1	-1	-1	-1	-1	-1
transcription-coupled-nucleotide-excision-repair:2	-1	2	-1	-1	-1	-1	-1	-1	-1	-1	-1	-1	-1	-1	-1
transcription-dependent-tethering-of-RNA-polymerase-II-gene-DNA-at-nuclear-periphery:2	-1	2	2	-1	-1	-1	2	-1	-1	-1	2	-1	-1	-1	-1
transcription-termination,-DNA-dependent:2	-1	-1	2	-1	-1	-1	2	-1	-1	-1	-1	-1	-1	-1	-1
transition-metal-ion-transport:2	-1	-1	-1	-1	-1	-1	-1	-1	-1	-1	-1	-1	-1	2	-1
translation:2	-1	-1	2	2	2	2	2	2	2	2	2	-1	-1	2	2
translational-elongation:2	-1	-1	-1	-1	2	-1	2	-1	2	-1	-1	-1	-1	-1	-1
translational-initiation:2	2	2	2	2	2	2	2	2	2	-1	2	-1	2	2	2
transmembrane-transport:2	-1	2	2	2	2	2	2	2	2	-1	2	-1	-1	-1	2
tubulin-complex-assembly:2	2	2	2	-1	-1	-1	-1	-1	-1	-1	-1	-1	-1	-1	-1
tubulin-complex-biogenesis:2	2	-1	-1	-1	-1	-1	-1	-1	-1	-1	-1	-1	-1	-1	-1
zinc-ion-transport:2	-1	-1	-1	-1	-1	-1	-1	-1	-1	-1	-1	-1	-1	2	-1
	-2	-2	-2	-2	-2	-2	-2	-2	-2	-2	-2	-2	-2	-2	-2
ATP-dependent-chromatin-remodeling:3	-1	3	3	-1	3	-1	-1	3	3	3	3	-1	-1	-1	-1
ATP-hydrolysis-coupled-proton-transport:3	-1	-1	3	-1	-1	-1	-1	-1	-1	-1	-1	-1	-1	3	3
CVT-pathway:3	-1	-1	-1	-1	-1	-1	-1	-1	-1	3	-1	-1	-1	-1	-1
DNA-conformation-change:3	-1	-1	3	-1	3	-1	-1	3	3	3	3	-1	-1	-1	3
DNA-dependent-DNA-replication:3	-1	-1	-1	3	3	-1	-1	3	3	-1	-1	-1	-1	-1	3
DNA-dependent-transcriptional-preinitiation-complex-assembly:3	3	-1	3	-1	3	-1	-1	3	3	-1	3	-1	-1	-1	-1
DNA-geometric-change:3	-1	-1	-1	-1	-1	-1	-1	-1	-1	3	-1	-1	-1	-1	-1
DNA-integrity-checkpoint:3	-1	-1	-1	-1	3	-1	-1	-1	3	-1	-1	-1	-1	-1	-1
DNA-metabolic-process:3	-1	3	3	3	3	3	3	3	3	3	3	-1	-1	-1	3
DNA-packaging:3	-1	-1	3	-1	3	-1	-1	3	3	-1	3	-1	-1	-1	-1
DNA-recombination:3	-1	-1	-1	-1	-1	-1	-1	-1	-1	3	-1	-1	-1	-1	-1
DNA-repair:3	-1	-1	3	3	3	3	3	3	3	3	3	-1	-1	-1	3
DNA-replication:3	-1	-1	-1	3	3	-1	-1	3	3	-1	3	-1	-1	-1	-1
DNA-replication-independent-nucleosome-organization:3	-1	3	-1	-1	-1	-1	-1	-1	-1	-1	-1	-1	-1	-1	-1
DNA-strand-elongation:3	-1	-1	-1	3	-1	-1	-1	-1	-1	-1	-1	-1	-1	-1	-1
DNA-strand-elongation-involved-in-DNA-replication:3	-1	-1	-1	3	-1	-1	-1	-1	-1	-1	-1	-1	-1	-1	-1
DNA-unwinding-involved-in-replication:3	-1	-1	-1	-1	-1	-1	-1	-1	-1	3	-1	-1	-1	-1	-1
ER-to-Golgi-vesicle-mediated-transport:3	3	3	3	-1	3	-1	-1	3	3	-1	3	3	-1	3	3
G1/S-transition-of-mitotic-cell-cycle:3	-1	-1	-1	-1	-1	-1	-1	3	3	-1	-1	-1	-1	-1	-1
G2/M-transition-of-mitotic-cell-cycle:3	-1	3	-1	-1	-1	-1	-1	-1	-1	-1	-1	-1	-1	-1	-1
Golgi-organization:3	-1	3	-1	-1	-1	-1	-1	-1	-1	-1	-1	-1	-1	-1	-1
Golgi-to-plasma-membrane-transport:3	3	-1	-1	-1	-1	-1	-1	-1	-1	-1	-1	-1	-1	-1	-1
Golgi-to-vacuole-transport:3	3	-1	-1	-1	-1	-1	-1	3	3	-1	3	-1	-1	3	-1
Golgi-vesicle-transport:3	3	3	3	-1	3	3	3	3	3	3	3	3	-1	3	3
M-phase:3	-1	3	3	-1	3	-1	-1	3	3	3	3	-1	-1	-1	3
M-phase-of-meiotic-cell-cycle:3	-1	-1	-1	-1	3	-1	-1	-1	3	-1	3	-1	-1	-1	-1
M-phase-of-mitotic-cell-cycle:3	-1	3	3	-1	3	-1	-1	3	3	3	3	-1	-1	-1	3
NLS-bearing-substrate-import-into-nucleus:3	-1	-1	-1	-1	-1	-1	-1	-1	-1	-1	-1	-1	-1	3	-1
RNA-biosynthetic-process:3	3	3	3	3	3	3	3	3	3	-1	3	-1	-1	3	3
RNA-capping:3	-1	-1	-1	-1	-1	-1	-1	-1	-1	-1	-1	-1	-1	3	-1
RNA-export-from-nucleus:3	-1	-1	-1	-1	-1	-1	-1	-1	-1	-1	-1	-1	-1	3	-1
RNA-polymerase-II-transcriptional-preinitiation-complex-assembly:3	-1	-1	-1	-1	3	-1	3	3	3	-1	3	-1	-1	-1	-1
RNA-splicing:3	3	-1	3	-1	-1	-1	-1	-1	-1	-1	-1	-1	-1	-1	-1
RNA-splicing,-via-transesterification-reactions:3	3	-1	3	3	-1	-1	-1	-1	-1	-1	-1	-1	-1	-1	-1
RNA-splicing,-via-transesterification-reactions-with-bulged-adenosine-as-nucleophile:3	3	-1	-1	3	-1	-1	-1	-1	-1	-1	-1	-1	-1	-1	-1
RNA-transport:3	-1	-1	-1	-1	-1	-1	-1	-1	-1	-1	-1	-1	-1	3	-1
anaphase-promoting-complex-dependent-proteasomal-ubiquitin-dependent-protein-catabolic-process:3	3	-1	-1	-1	3	-1	-1	-1	-1	-1	3	-1	-1	-1	-1
anatomical-structure-homeostasis:3	-1	-1	3	-1	-1	-1	-1	-1	-1	-1	-1	-1	-1	-1	-1
aromatic-amino-acid-family-metabolic-process:3	-1	-1	-1	-1	-1	-1	-1	-1	-1	-1	-1	-1	-1	-1	3
asexual-reproduction:3	3	-1	-1	-1	-1	-1	-1	-1	-1	-1	-1	-1	-1	-1	-1
autophagy:3	-1	-1	-1	-1	-1	-1	-1	-1	-1	3	-1	-1	-1	-1	-1
biological-regulation:3	3	3	3	3	3	3	3	3	3	3	3	-1	-1	3	3
biosynthetic-process:3	3	-1	3	3	-1	-1	-1	-1	-1	-1	-1	-1	-1	-1	-1
cation-homeostasis:3	-1	-1	3	-1	3	3	-1	3	3	3	3	-1	-1	-1	-1
cation-transport:3	-1	-1	-1	-1	3	3	-1	3	3	3	3	-1	-1	-1	3
cell-budding:3	3	-1	-1	-1	-1	-1	-1	-1	-1	-1	-1	-1	-1	-1	-1
cell-communication:3	-1	-1	-1	-1	-1	-1	-1	-1	-1	3	-1	-1	-1	-1	-1
cell-cycle:3	-1	3	3	3	3	-1	-1	3	3	3	3	-1	-1	-1	3
cell-cycle-checkpoint:3	3	3	3	-1	3	-1	-1	3	3	3	3	-1	-1	-1	3
cell-cycle-phase:3	-1	3	3	-1	3	-1	-1	3	3	3	3	-1	-1	-1	3
cell-cycle-process:3	3	3	3	-1	3	-1	-1	3	3	3	3	-1	-1	-1	3
cell-division:3	3	3	3	-1	3	-1	-1	-1	3	-1	3	-1	-1	-1	-1
cell-morphogenesis:3	3	-1	-1	-1	-1	-1	-1	-1	-1	-1	-1	-1	-1	-1	-1
cell-wall-organization-or-biogenesis:3	-1	-1	-1	-1	-1	-1	-1	3	3	-1	3	-1	-1	-1	3
cellular-biogenic-amine-biosynthetic-process:3	-1	-1	3	-1	-1	-1	-1	-1	-1	-1	-1	-1	-1	-1	-1
cellular-biosynthetic-process:3	3	-1	3	-1	-1	-1	-1	-1	-1	-1	-1	-1	-1	-1	-1
cellular-cation-homeostasis:3	3	-1	3	-1	3	3	-1	3	3	-1	3	-1	-1	-1	-1
cellular-cell-wall-organization-or-biogenesis:3	-1	-1	-1	-1	-1	-1	-1	3	3	-1	3	-1	-1	-1	3
cellular-chemical-homeostasis:3	-1	-1	3	-1	3	3	-1	3	3	3	3	-1	-1	-1	3
cellular-component-organization:3	3	3	3	-1	3	-1	-1	3	3	3	3	-1	-1	3	3
cellular-component-organization-at-cellular-level:3	3	3	3	-1	3	-1	-1	3	3	3	3	-1	-1	3	3
cellular-component-organization-or-biogenesis:3	3	-1	-1	-1	-1	-1	-1	-1	-1	-1	-1	-1	-1	-1	-1
cellular-homeostasis:3	-1	-1	-1	-1	3	3	-1	3	3	-1	3	-1	-1	-1	3
cellular-ion-homeostasis:3	-1	-1	3	-1	3	3	-1	3	3	3	3	-1	-1	-1	3
cellular-iron-ion-homeostasis:3	-1	-1	-1	-1	3	-1	-1	-1	3	3	3	-1	-1	-1	-1
cellular-localization:3	3	3	3	-1	3	-1	3	3	3	3	3	3	-1	3	3
cellular-macromolecule-biosynthetic-process:3	3	-1	3	3	-1	-1	-1	-1	-1	-1	-1	-1	-1	-1	3
cellular-macromolecule-localization:3	3	3	3	-1	3	-1	-1	3	3	3	3	3	-1	3	3
cellular-membrane-fusion:3	3	3	3	-1	3	-1	-1	3	-1	-1	-1	-1	-1	-1	-1
cellular-membrane-organization:3	3	3	-1	-1	-1	-1	-1	-1	-1	-1	-1	-1	-1	-1	-1
cellular-metal-ion-homeostasis:3	-1	-1	-1	-1	-1	-1	-1	-1	3	-1	3	-1	-1	-1	-1
cellular-monovalent-inorganic-cation-homeostasis:3	3	-1	3	-1	3	3	3	3	3	-1	3	-1	-1	3	3
cellular-process:3	3	-1	3	-1	-1	-1	-1	-1	-1	-1	-1	-1	-1	-1	-1
cellular-process-involved-in-reproduction:3	-1	3	-1	-1	3	-1	-1	-1	-1	-1	-1	-1	-1	-1	-1
cellular-protein-localization:3	3	3	3	-1	3	-1	-1	3	3	3	3	3	-1	3	3
cellular-protein-metabolic-process:3	3	-1	-1	-1	-1	-1	-1	-1	-1	-1	-1	-1	-1	-1	-1
cellular-response-to-external-stimulus:3	-1	-1	-1	-1	-1	-1	-1	-1	-1	3	-1	-1	-1	-1	-1
cellular-response-to-extracellular-stimulus:3	-1	-1	-1	-1	-1	-1	-1	-1	-1	3	-1	-1	-1	-1	-1
cellular-response-to-nutrient-levels:3	-1	-1	-1	-1	-1	-1	-1	-1	-1	3	-1	-1	-1	-1	-1
cellular-response-to-starvation:3	-1	-1	-1	-1	-1	-1	-1	-1	-1	3	-1	-1	-1	-1	-1
cellular-response-to-stimulus:3	-1	3	3	3	3	3	-1	3	3	3	3	-1	-1	-1	3
cellular-response-to-stress:3	-1	-1	-1	3	3	3	-1	3	3	3	3	-1	-1	-1	-1
chemical-homeostasis:3	-1	-1	3	-1	3	3	-1	3	3	3	3	-1	-1	-1	-1
chromatin-assembly-or-disassembly:3	-1	-1	3	-1	3	-1	-1	3	3	-1	3	-1	-1	3	-1
chromatin-disassembly:3	-1	-1	3	-1	3	-1	-1	3	3	-1	3	-1	-1	-1	-1
chromatin-modification:3	3	3	3	3	3	3	3	3	3	3	3	-1	-1	3	3
chromatin-organization:3	3	3	3	3	3	3	3	3	3	3	3	-1	-1	3	3
chromatin-remodeling:3	-1	3	3	-1	3	3	3	3	3	3	3	-1	-1	-1	3
chromatin-silencing:3	-1	-1	3	-1	-1	-1	-1	-1	-1	-1	-1	-1	-1	-1	3
chromatin-silencing-at-silent-mating-type-cassette:3	-1	-1	-1	-1	-1	-1	-1	3	-1	-1	-1	-1	-1	-1	3
chromosome-condensation:3	-1	-1	3	-1	3	-1	-1	3	3	3	3	-1	-1	-1	3
chromosome-organization:3	3	3	3	3	3	3	3	3	3	3	3	-1	-1	3	3
chromosome-organization-involved-in-meiosis:3	-1	-1	-1	-1	-1	-1	3	-1	-1	-1	-1	-1	-1	-1	-1
chromosome-segregation:3	-1	3	3	-1	3	-1	-1	3	3	3	3	-1	-1	3	3
coenzyme-biosynthetic-process:3	-1	-1	3	-1	3	-1	-1	-1	-1	-1	-1	-1	-1	-1	-1
cofactor-biosynthetic-process:3	-1	-1	3	-1	3	-1	-1	3	3	-1	-1	-1	-1	-1	-1
cofactor-metabolic-process:3	-1	-1	-1	-1	3	-1	-1	-1	-1	-1	-1	-1	-1	-1	-1
conjugation:3	-1	3	-1	-1	3	-1	-1	-1	-1	-1	-1	-1	-1	-1	-1
conjugation-with-cellular-fusion:3	-1	3	-1	-1	-1	-1	-1	-1	-1	-1	-1	-1	-1	-1	-1
covalent-chromatin-modification:3	3	3	3	-1	3	3	-1	3	3	3	3	-1	-1	-1	3
cyclin-catabolic-process:3	3	-1	-1	-1	3	-1	-1	-1	3	-1	-1	-1	-1	-1	-1
cytoskeleton-organization:3	-1	-1	-1	-1	3	-1	-1	-1	3	3	3	-1	-1	-1	-1
double-strand-break-repair:3	-1	-1	-1	-1	3	-1	-1	-1	3	3	3	-1	-1	-1	-1
endosome-transport:3	-1	-1	-1	-1	-1	-1	-1	3	3	-1	3	-1	-1	-1	-1
energy-coupled-proton-transport,-against-electrochemical-gradient:3	-1	-1	3	-1	-1	-1	-1	-1	-1	-1	-1	-1	-1	3	3
establishment-of-RNA-localization:3	-1	-1	-1	-1	-1	-1	-1	-1	-1	-1	-1	-1	-1	3	-1
establishment-of-localization:3	3	3	3	-1	3	3	3	3	3	3	3	3	-1	3	3
establishment-of-localization-in-cell:3	3	3	3	-1	3	-1	3	3	3	3	3	3	-1	3	3
establishment-of-mitotic-sister-chromatid-cohesion:3	-1	-1	-1	-1	3	-1	-1	3	3	-1	3	-1	-1	-1	-1
establishment-of-protein-localization:3	3	3	3	-1	3	-1	3	3	3	3	3	3	-1	3	3
establishment-of-protein-localization-to-organelle:3	3	3	-1	-1	-1	-1	-1	-1	-1	-1	-1	-1	-1	-1	-1
establishment-of-protein-localization-to-peroxisome:3	-1	-1	-1	-1	3	-1	-1	-1	-1	-1	-1	-1	-1	-1	-1
establishment-of-protein-localization-to-vacuole:3	-1	3	-1	-1	-1	-1	-1	-1	-1	3	-1	-1	-1	-1	-1
establishment-of-sister-chromatid-cohesion:3	-1	-1	-1	-1	3	-1	-1	3	3	-1	3	-1	-1	-1	-1
exocytosis:3	3	-1	3	-1	-1	-1	3	-1	-1	-1	-1	-1	-1	-1	-1
exonucleolytic-nuclear-transcribed-mRNA-catabolic-process-involved-in-deadenylation-dependent-decay:3	-1	-1	-1	-1	-1	-1	-1	-1	-1	-1	-1	-1	-1	-1
gene-conversion-at-mating-type-locus:3	-1	3	-1	-1	-1	-1	-1	-1	-1	-1	-1	-1	-1	-1	-1
gene-silencing:3	-1	-1	3	-1	-1	-1	-1	-1	-1	-1	-1	-1	-1	-1	-1
glycerolipid-biosynthetic-process:3	-1	-1	-1	-1	-1	-1	-1	-1	-1	3	-1	-1	-1	-1	-1
glycerolipid-metabolic-process:3	-1	-1	-1	-1	-1	-1	-1	-1	-1	3	-1	-1	-1	-1	-1
glycerophospholipid-biosynthetic-process:3	-1	-1	-1	-1	-1	-1	-1	-1	-1	3	-1	-1	-1	-1	-1
glycoprotein-biosynthetic-process:3	-1	3	3	-1	3	-1	-1	3	3	-1	3	-1	-1	-1	3
glycoprotein-metabolic-process:3	3	3	3	-1	3	-1	-1	3	3	-1	3	-1	-1	-1	3
glycosylation:3	-1	3	3	-1	-1	-1	-1	3	3	-1	3	-1	-1	-1	3
histone-H3-K4-methylation:3	-1	-1	-1	-1	-1	-1	-1	-1	-1	3	3	-1	-1	-1	-1
histone-acetylation:3	-1	3	3	-1	3	-1	-1	-1	-1	3	3	-1	-1	-1	-1
histone-deacetylation:3	3	-1	3	-1	3	-1	-1	-1	-1	-1	3	-1	-1	-1	3
histone-lysine-methylation:3	-1	-1	-1	-1	-1	-1	-1	-1	-1	3	-1	-1	-1	-1	-1
histone-methylation:3	-1	-1	3	-1	-1	-1	-1	-1	-1	3	-1	-1	-1	-1	-1
histone-modification:3	3	3	3	-1	3	3	-1	3	3	3	3	-1	-1	-1	3
homeostatic-process:3	-1	-1	3	-1	3	-1	-1	3	3	3	3	-1	-1	-1	3
hydrogen-transport:3	3	-1	3	-1	-1	3	-1	-1	-1	-1	-1	-1	-1	-1	-1
inositol-lipid-mediated-signaling:3	-1	3	-1	-1	-1	-1	-1	-1	-1	-1	-1	-1	-1	-1	-1
internal-peptidyl-lysine-acetylation:3	-1	3	3	-1	3	-1	-1	-1	-1	3	3	-1	-1	-1	-1
internal-protein-amino-acid-acetylation:3	-1	3	3	-1	3	-1	-1	-1	-1	3	3	-1	-1	-1	-1
interphase:3	-1	-1	3	-1	-1	-1	-1	-1	-1	-1	-1	-1	-1	-1	-1
interphase-of-mitotic-cell-cycle:3	-1	-1	3	-1	-1	-1	-1	-1	3	-1	-1	-1	-1	-1	-1
intra-Golgi-vesicle-mediated-transport:3	3	3	3	-1	3	-1	-1	3	3	3	3	-1	-1	3	3
intracellular-pH-reduction:3	3	-1	3	-1	-1	3	3	3	3	-1	3	-1	-1	3	3
intracellular-protein-transport:3	3	3	3	-1	3	-1	-1	3	3	3	3	3	-1	3	3
intracellular-signal-transduction:3	-1	-1	-1	-1	3	-1	-1	-1	-1	-1	-1	-1	-1	-1	-1
intracellular-transport:3	3	3	3	-1	3	-1	3	3	3	3	3	3	-1	3	3
ion-homeostasis:3	-1	-1	3	-1	3	3	-1	3	3	3	3	-1	-1	-1	3
ion-transmembrane-transport:3	-1	-1	-1	-1	-1	3	3	3	3	-1	3	-1	-1	-1	3
ion-transport:3	-1	-1	-1	-1	3	3	-1	3	3	3	3	-1	-1	-1	-1
iron-ion-homeostasis:3	-1	-1	-1	-1	-1	-1	-1	-1	-1	3	-1	-1	-1	-1	-1
iron-sulfur-cluster-assembly:3	-1	-1	3	-1	3	-1	-1	3	3	-1	-1	-1	-1	-1	-1
isoprenoid-biosynthetic-process:3	-1	-1	3	-1	-1	-1	-1	-1	-1	-1	-1	-1	-1	-1	-1
isoprenoid-metabolic-process:3	-1	-1	3	-1	-1	-1	-1	-1	-1	-1	-1	-1	-1	-1	-1
lipid-biosynthetic-process:3	-1	-1	3	-1	-1	-1	-1	-1	-1	-1	-1	-1	-1	-1	-1
lipid-localization:3	-1	3	-1	-1	3	-1	-1	-1	-1	-1	3	-1	-1	-1	-1
lipid-transport:3	-1	3	-1	-1	3	-1	-1	-1	3	-1	3	-1	-1	-1	3
lipoprotein-biosynthetic-process:3	-1	-1	-1	-1	-1	-1	-1	-1	-1	3	-1	-1	-1	-1	-1
lipoprotein-metabolic-process:3	-1	-1	-1	-1	-1	-1	-1	-1	-1	3	-1	-1	-1	-1	-1
localization:3	3	3	3	-1	3	3	3	3	3	3	3	3	-1	3	3
localization-within-membrane:3	-1	-1	-1	-1	-1	-1	-1	-1	-1	-1	-1	-1	-1	3	-1
mRNA-3'-end-processing:3	3	-1	3	-1	-1	-1	-1	-1	-1	-1	-1	-1	-1	-1	-1
mRNA-export-from-nucleus:3	-1	-1	-1	-1	-1	-1	-1	-1	-1	-1	-1	-1	-1	3	-1
mRNA-metabolic-process:3	-1	-1	-1	3	-1	-1	-1	-1	-1	-1	-1	-1	-1	-1	-1
mRNA-processing:3	3	-1	3	3	-1	-1	-1	-1	-1	-1	-1	-1	-1	-1	-1
mRNA-transport:3	-1	-1	-1	-1	-1	-1	-1	-1	-1	-1	-1	3	-1	3	-1
macroautophagy:3	-1	-1	-1	-1	-1	-1	-1	-1	-1	3	-1	-1	-1	-1	-1
macromolecule-biosynthetic-process:3	3	-1	3	3	-1	-1	-1	-1	-1	-1	-1	-1	-1	-1	3
macromolecule-glycosylation:3	-1	3	3	-1	3	-1	-1	3	3	-1	3	-1	-1	-1	3
macromolecule-localization:3	3	3	3	-1	3	-1	3	3	3	3	3	3	-1	3	3
macromolecule-modification:3	-1	3	-1	-1	3	-1	-1	3	3	3	3	-1	-1	-1	-1
meiosis:3	-1	-1	-1	-1	3	-1	-1	-1	3	-1	3	-1	-1	-1	-1
meiotic-cell-cycle:3	-1	3	-1	-1	3	-1	-1	-1	3	-1	3	-1	-1	-1	-1
meiotic-chromosome-segregation:3	-1	-1	-1	-1	-1	-1	-1	-1	-1	-1	3	-1	-1	-1	-1
meiotic-sister-chromatid-segregation:3	-1	-1	-1	-1	-1	-1	3	-1	-1	-1	-1	-1	-1	-1	-1
membrane-budding:3	3	-1	3	-1	-1	-1	-1	-1	-1	-1	3	-1	-1	-1	-1
membrane-docking:3	3	3	3	-1	3	3	-1	-1	3	-1	3	-1	-1	-1	-1
membrane-fusion:3	3	3	3	-1	3	-1	-1	3	-1	-1	-1	-1	-1	-1	-1
membrane-organization:3	3	3	-1	-1	-1	-1	-1	-1	-1	-1	-1	-1	-1	-1	-1
metal-ion-homeostasis:3	-1	-1	-1	-1	-1	-1	-1	-1	3	-1	3	-1	-1	-1	-1
metal-ion-transport:3	-1	-1	-1	-1	-1	-1	-1	-1	-1	-1	3	-1	-1	-1	-1
metallo-sulfur-cluster-assembly:3	-1	-1	3	-1	3	-1	-1	3	3	-1	-1	-1	-1	-1	-1
microtubule-based-process:3	-1	3	3	-1	3	-1	-1	3	3	-1	3	-1	-1	-1	-1
microtubule-cytoskeleton-organization:3	-1	-1	3	-1	3	-1	-1	3	3	-1	3	-1	-1	-1	-1
microtubule-nucleation:3	-1	-1	-1	-1	3	-1	-1	-1	-1	-1	-1	-1	-1	-1	3
mismatch-repair:3	-1	-1	-1	3	-1	-1	-1	-1	-1	-1	-1	-1	-1	-1	-1
mitochondrial-protein-processing:3	-1	-1	-1	-1	-1	-1	-1	-1	-1	3	-1	-1	-1	-1	-1
mitochondrial-translation:3	3	-1	3	-1	-1	-1	-1	-1	-1	-1	-1	-1	-1	-1	-1
mitochondrion-organization:3	3	-1	3	-1	-1	-1	-1	-1	-1	-1	-1	-1	-1	-1	-1
mitosis:3	-1	3	3	-1	3	-1	-1	3	3	3	3	-1	-1	-1	3
mitotic-cell-cycle:3	3	3	3	-1	3	3	-1	3	3	3	3	-1	-1	-1	3
mitotic-cell-cycle-checkpoint:3	3	3	3	-1	3	-1	-1	3	3	3	3	-1	-1	3	3
mitotic-cell-cycle-spindle-assembly-checkpoint:3	-1	-1	-1	-1	-1	-1	-1	-1	-1	3	-1	-1	-1	-1	-1
mitotic-cell-cycle-spindle-checkpoint:3	3	-1	3	-1	3	-1	-1	-1	-1	3	3	-1	-1	-1	-1
mitotic-chromosome-condensation:3	-1	-1	-1	-1	3	-1	-1	3	3	-1	3	-1	-1	-1	-1
mitotic-metaphase/anaphase-transition:3	3	-1	-1	-1	-1	-1	-1	-1	-1	-1	-1	-1	-1	-1	-1
mitotic-recombination:3	-1	3	-1	-1	-1	-1	-1	-1	-1	3	-1	-1	-1	-1	-1
mitotic-sister-chromatid-cohesion:3	-1	-1	3	-1	3	-1	-1	3	3	-1	3	-1	-1	-1	3
mitotic-sister-chromatid-segregation:3	-1	3	3	-1	3	-1	-1	3	3	3	3	-1	-1	-1	3
mitotic-spindle-elongation:3	-1	-1	3	-1	-1	-1	-1	-1	3	-1	-1	-1	-1	-1	-1
mitotic-spindle-organization:3	-1	-1	3	-1	3	-1	-1	3	3	-1	3	-1	-1	-1	-1
mitotic-spindle-organization-in-nucleus:3	-1	-1	-1	-1	-1	-1	-1	3	3	-1	-1	-1	-1	-1	-1
monovalent-inorganic-cation-homeostasis:3	3	-1	3	-1	3	3	3	3	3	-1	3	-1	-1	3	3
monovalent-inorganic-cation-transport:3	-1	-1	3	-1	-1	3	-1	3	3	-1	3	-1	-1	-1	3
multi-organism-process:3	-1	3	3	-1	3	-1	-1	-1	-1	-1	-1	-1	-1	-1	-1
negative-regulation-of-RNA-metabolic-process:3	-1	3	3	-1	3	-1	-1	3	3	3	3	-1	-1	-1	3
negative-regulation-of-biological-process:3	-1	3	3	-1	3	-1	-1	-1	3	-1	-1	-1	-1	-1	3
negative-regulation-of-biosynthetic-process:3	-1	-1	3	-1	3	-1	-1	3	-1	-1	-1	-1	-1	-1	3
negative-regulation-of-cell-cycle-process:3	-1	3	-1	-1	-1	-1	-1	-1	-1	-1	-1	-1	-1	-1	-1
negative-regulation-of-cellular-biosynthetic-process:3	-1	-1	3	-1	3	-1	-1	3	-1	-1	-1	-1	-1	-1	3
negative-regulation-of-cellular-macromolecule-biosynthetic-process:3	-1	3	3	-1	3	-1	-1	3	3	-1	3	-1	-1	-1	3
negative-regulation-of-cellular-metabolic-process:3	-1	-1	3	-1	3	-1	-1	-1	-1	-1	-1	-1	-1	-1	-1
negative-regulation-of-cellular-process:3	-1	3	3	-1	3	-1	-1	3	3	-1	3	-1	-1	-1	3
negative-regulation-of-gene-expression:3	-1	3	3	-1	3	-1	-1	3	3	3	3	-1	-1	3	3
negative-regulation-of-gene-expression,-epigenetic:3	-1	-1	3	-1	-1	-1	-1	-1	-1	-1	-1	-1	-1	-1	3
negative-regulation-of-macromolecule-biosynthetic-process:3	-1	3	3	-1	3	-1	-1	3	3	-1	3	-1	-1	-1	3
negative-regulation-of-macromolecule-metabolic-process:3	-1	3	3	-1	3	-1	-1	3	3	-1	-1	-1	-1	-1	3
negative-regulation-of-metabolic-process:3	-1	-1	3	-1	3	-1	-1	-1	-1	-1	-1	-1	-1	-1	-1
negative-regulation-of-mitosis:3	-1	-1	-1	-1	-1	-1	-1	-1	-1	3	-1	-1	-1	-1	-1
negative-regulation-of-mitotic-metaphase/anaphase-transition:3	-1	-1	-1	-1	-1	-1	-1	-1	-1	3	-1	-1	-1	-1	-1
negative-regulation-of-nitrogen-compound-metabolic-process:3	-1	3	3	-1	3	-1	-1	3	3	3	3	-1	-1	-1	3
negative-regulation-of-nuclear-division:3	-1	-1	-1	-1	-1	-1	-1	-1	-1	3	-1	-1	-1	-1	-1
negative-regulation-of-nucleobase,-nucleoside,-nucleotide-and-nucleic-acid-metabolic-process:3	-1	3	3	-1	3	-1	-1	3	3	3	3	-1	-1	-1	3
negative-regulation-of-signal-transduction:3	-1	-1	-1	-1	3	-1	-1	-1	-1	-1	-1	-1	-1	-1	-1
negative-regulation-of-signaling:3	-1	-1	-1	-1	3	-1	-1	-1	-1	-1	-1	-1	-1	-1	-1
negative-regulation-of-transcription,-DNA-dependent:3	-1	3	3	-1	3	-1	-1	3	3	3	3	-1	-1	3	3
negative-regulation-of-transcription-from-RNA-polymerase-II-promoter:3	-1	-1	3	-1	3	-1	-1	3	-1	-1	3	-1	-1	-1	3
negative-regulation-of-transferase-activity:3	-1	-1	-1	-1	3	-1	-1	-1	-1	-1	-1	-1	-1	-1	-1
negative-regulation-of-transposition:3	-1	-1	3	-1	3	-1	-1	-1	-1	-1	-1	-1	-1	-1	3
negative-regulation-of-transposition,-RNA-mediated:3	-1	-1	3	-1	3	-1	-1	-1	-1	-1	-1	-1	-1	-1	3
nuclear-division:3	-1	3	3	-1	3	-1	-1	3	3	3	3	-1	-1	-1	3
nuclear-mRNA-splicing,-via-spliceosome:3	3	-1	3	3	-1	-1	-1	-1	-1	-1	-1	-1	-1	-1	-1
nuclear-transcribed-mRNA-catabolic-process,-3'-5'-exonucleolytic-nonsense-mediated-decay:3	-1	-1	-1	-1	-1	-1	-1	-1	-1	-1	-1	3	-1	-1	-1
nuclear-transcribed-mRNA-catabolic-process,-exonucleolytic:3	-1	-1	-1	-1	-1	-1	-1	-1	-1	-1	-1	3	-1	-1	-1
nuclear-transcribed-mRNA-catabolic-process,-exonucleolytic,-3'-5':3	-1	-1	-1	-1	-1	-1	-1	-1	-1	-1	-1	3	-1	-1	-1
nucleosome-disassembly:3	-1	-1	3	-1	3	-1	-1	3	3	-1	3	-1	-1	-1	-1
nucleosome-mobilization:3	-1	-1	-1	-1	-1	-1	3	-1	-1	-1	-1	-1	-1	-1	3
nucleosome-organization:3	-1	3	3	3	3	-1	-1	3	3	-1	3	-1	-1	3	3
organelle-fission:3	-1	3	3	-1	3	-1	-1	3	3	3	3	-1	-1	-1	3
organelle-fusion:3	3	3	-1	-1	3	-1	-1	3	-1	-1	3	-1	-1	-1	-1
organelle-organization:3	3	3	3	-1	3	-1	-1	3	3	3	3	-1	-1	3	3
pH-reduction:3	3	-1	3	-1	-1	3	3	3	3	-1	3	-1	-1	3	3
peptidyl-lysine-acetylation:3	-1	3	3	-1	3	-1	-1	-1	-1	3	3	-1	-1	-1	-1
peroxisomal-transport:3	-1	-1	-1	-1	3	-1	-1	-1	-1	-1	-1	-1	-1	-1	-1
peroxisome-degradation:3	-1	3	-1	-1	-1	-1	-1	-1	-1	-1	-1	-1	-1	-1	-1
peroxisome-organization:3	3	3	3	-1	3	-1	-1	-1	-1	-1	-1	-1	-1	-1	-1
phosphate-metabolic-process:3	-1	-1	-1	-1	3	-1	-1	-1	3	-1	3	-1	-1	-1	3
phospholipid-biosynthetic-process:3	-1	-1	3	-1	-1	-1	-1	-1	-1	-1	-1	-1	-1	-1	-1
phospholipid-transport:3	-1	-1	-1	-1	-1	-1	-1	3	3	-1	3	-1	-1	-1	-1
phosphorus-metabolic-process:3	-1	-1	-1	-1	3	-1	-1	-1	3	-1	3	-1	-1	-1	3
phosphorylation:3	-1	-1	-1	-1	3	-1	-1	-1	-1	-1	3	-1	-1	-1	-1
phosphorylation-of-RNA-polymerase-II-C-terminal-domain:3	-1	-1	3	-1	3	-1	-1	3	3	-1	3	-1	-1	-1	-1
poly(A)+-mRNA-export-from-nucleus:3	-1	-1	-1	-1	-1	-1	-1	-1	-1	-1	-1	-1	-1	3	-1
positive-regulation-of-GTPase-activity:3	-1	3	3	-1	3	-1	-1	3	3	-1	3	-1	-1	-1	-1
positive-regulation-of-RNA-metabolic-process:3	-1	-1	-1	-1	3	-1	-1	-1	-1	-1	3	-1	-1	-1	-1
positive-regulation-of-Rab-GTPase-activity:3	-1	3	-1	-1	-1	-1	-1	-1	-1	-1	-1	-1	-1	-1	-1
positive-regulation-of-Ras-GTPase-activity:3	-1	3	-1	-1	-1	-1	-1	-1	-1	-1	-1	-1	-1	-1	-1
positive-regulation-of-biological-process:3	-1	-1	-1	-1	3	-1	-1	-1	-1	-1	-1	-1	-1	-1	-1
positive-regulation-of-biosynthetic-process:3	-1	-1	3	-1	3	-1	-1	-1	-1	-1	-1	-1	-1	-1	-1
positive-regulation-of-catalytic-activity:3	-1	-1	-1	-1	3	-1	-1	3	3	-1	3	-1	-1	-1	-1
positive-regulation-of-cellular-biosynthetic-process:3	-1	-1	3	-1	3	-1	-1	-1	-1	-1	-1	-1	-1	-1	-1
positive-regulation-of-cellular-metabolic-process:3	-1	-1	-1	-1	3	-1	-1	-1	-1	-1	-1	-1	-1	-1	-1
positive-regulation-of-cellular-process:3	-1	-1	3	-1	3	-1	-1	-1	-1	-1	-1	-1	-1	-1	-1
positive-regulation-of-cytoskeleton-organization:3	-1	-1	-1	-1	-1	-1	-1	-1	-1	-1	-1	3	-1	-1	-1
positive-regulation-of-gene-expression:3	-1	-1	-1	-1	3	3	-1	-1	3	-1	3	-1	-1	-1	-1
positive-regulation-of-hydrolase-activity:3	-1	-1	3	-1	3	-1	-1	3	3	-1	3	-1	-1	-1	-1
positive-regulation-of-macromolecule-biosynthetic-process:3	-1	-1	3	-1	3	-1	-1	-1	-1	-1	-1	-1	-1	-1	-1
positive-regulation-of-macromolecule-metabolic-process:3	-1	-1	-1	-1	3	-1	-1	-1	-1	-1	-1	-1	-1	-1	-1
positive-regulation-of-metabolic-process:3	-1	-1	-1	-1	3	-1	-1	-1	-1	-1	-1	-1	-1	-1	-1
positive-regulation-of-mitochondrial-translation:3	3	-1	-1	-1	-1	-1	-1	-1	-1	-1	-1	-1	-1	-1	-1
positive-regulation-of-mitochondrion-organization:3	3	-1	-1	-1	-1	-1	-1	-1	-1	-1	-1	-1	-1	-1	-1
positive-regulation-of-molecular-function:3	-1	-1	-1	-1	-1	-1	-1	-1	3	-1	-1	-1	-1	-1	-1
positive-regulation-of-nitrogen-compound-metabolic-process:3	-1	-1	-1	-1	3	-1	-1	-1	-1	-1	-1	-1	-1	-1	-1
positive-regulation-of-nucleobase,-nucleoside,-nucleotide-and-nucleic-acid-metabolic-process:3	-1	-1	-1	-1	3	-1	-1	-1	-1	-1	-1	-1	-1	-1	-1
positive-regulation-of-transcription,-DNA-dependent:3	-1	-1	-1	-1	3	-1	-1	-1	-1	-1	3	-1	-1	-1	-1
positive-regulation-of-transcription-from-RNA-polymerase-II-promoter:3	-1	-1	-1	-1	3	-1	-1	-1	-1	-1	-1	-1	-1	-1	-1
positive-regulation-of-translation:3	3	-1	-1	-1	-1	-1	-1	-1	-1	-1	-1	-1	-1	-1	-1
post-Golgi-vesicle-mediated-transport:3	3	-1	3	-1	3	-1	-1	3	3	3	3	-1	-1	-1	3
protein-DNA-complex-assembly:3	-1	-1	3	3	3	-1	-1	3	3	-1	3	-1	-1	-1	-1
protein-DNA-complex-disassembly:3	-1	-1	3	-1	3	-1	-1	3	3	-1	3	-1	-1	-1	-1
protein-DNA-complex-subunit-organization:3	-1	3	3	3	3	-1	3	3	3	3	3	-1	-1	-1	3
protein-N-linked-glycosylation:3	3	3	3	-1	3	-1	-1	3	3	-1	3	-1	-1	-1	3
protein-acetylation:3	-1	3	3	-1	-1	-1	-1	-1	-1	-1	-1	-1	-1	-1	-1
protein-acylation:3	-1	3	-1	-1	3	-1	-1	-1	-1	3	3	-1	-1	-1	-1
protein-deacetylation:3	3	-1	3	-1	3	-1	-1	-1	-1	-1	-1	-1	-1	-1	-1
protein-deacylation:3	3	-1	3	-1	3	-1	-1	-1	-1	-1	-1	-1	-1	-1	-1
protein-dephosphorylation:3	-1	-1	-1	-1	3	-1	-1	-1	-1	-1	-1	-1	-1	-1	-1
protein-depolymerization:3	-1	-1	-1	-1	-1	-1	-1	-1	-1	3	-1	-1	-1	-1	-1
protein-export-from-nucleus:3	-1	-1	-1	-1	-1	-1	-1	-1	-1	-1	-1	-1	-1	3	-1
protein-glycosylation:3	-1	3	3	-1	3	-1	-1	3	3	-1	3	-1	-1	-1	3
protein-import-into-peroxisome-matrix:3	-1	-1	-1	-1	3	-1	-1	-1	-1	-1	-1	-1	-1	-1	-1
protein-insertion-into-membrane:3	3	-1	-1	-1	-1	-1	-1	-1	-1	-1	-1	-1	-1	-1	-1
protein-lipidation:3	-1	-1	-1	-1	-1	-1	-1	-1	-1	3	-1	-1	-1	-1	-1
protein-localization:3	3	3	3	-1	3	-1	3	3	3	3	3	3	-1	3	3
protein-localization-to-chromosome:3	3	-1	3	-1	3	-1	-1	-1	3	3	3	-1	-1	-1	3
protein-localization-to-organelle:3	3	3	3	-1	3	-1	-1	-1	-1	3	-1	3	-1	3	-1
protein-localization-to-peroxisome:3	-1	-1	-1	-1	3	-1	-1	-1	-1	-1	-1	-1	-1	-1	-1
protein-localization-to-vacuole:3	-1	3	-1	-1	-1	-1	-1	-1	-1	3	-1	-1	-1	-1	-1
protein-maturation:3	-1	-1	-1	-1	3	-1	-1	-1	-1	-1	-1	-1	-1	-1	-1
protein-metabolic-process:3	3	-1	-1	-1	-1	-1	-1	-1	-1	-1	-1	-1	-1	-1	-1
protein-modification-by-small-protein-conjugation:3	3	-1	-1	-1	-1	-1	-1	-1	-1	-1	-1	-1	-1	-1	-1
protein-modification-process:3	3	3	3	-1	3	3	3	3	3	3	3	-1	-1	-1	3
protein-palmitoylation:3	-1	-1	-1	-1	-1	-1	-1	-1	-1	-1	3	-1	-1	-1	-1
protein-phosphorylation:3	-1	-1	-1	-1	3	-1	-1	3	3	-1	3	-1	-1	-1	3
protein-processing:3	-1	-1	-1	-1	-1	-1	-1	-1	-1	3	-1	-1	-1	-1	-1
protein-processing-involved-in-protein-targeting-to-mitochondrion:3	-1	-1	-1	-1	-1	-1	-1	-1	-1	3	-1	-1	-1	-1	-1
protein-sumoylation:3	-1	-1	3	-1	3	-1	-1	-1	-1	-1	-1	-1	-1	-1	-1
protein-targeting:3	3	3	-1	-1	-1	-1	-1	-1	-1	3	-1	3	-1	3	-1
protein-targeting-to-peroxisome:3	-1	-1	-1	-1	3	-1	-1	-1	-1	-1	-1	-1	-1	-1	-1
protein-targeting-to-vacuole:3	-1	3	-1	-1	-1	-1	-1	-1	-1	3	-1	-1	-1	-1	-1
protein-transport:3	3	3	3	-1	3	-1	3	3	3	3	3	3	-1	3	3
protein-ubiquitination:3	3	-1	-1	-1	-1	-1	-1	-1	-1	-1	-1	-1	-1	-1	-1
proton-transport:3	3	-1	3	-1	-1	3	-1	3	3	-1	-1	-1	-1	-1	3
re-entry-into-mitotic-cell-cycle:3	-1	3	-1	-1	-1	-1	-1	-1	-1	-1	-1	-1	-1	-1	-1
re-entry-into-mitotic-cell-cycle-after-pheromone-arrest:3	-1	3	-1	-1	-1	-1	-1	-1	-1	-1	-1	-1	-1	-1	-1
recombinational-repair:3	-1	-1	-1	-1	3	-1	-1	-1	-1	-1	-1	-1	-1	-1	-1
regulation-of-DNA-dependent-DNA-replication:3	-1	3	3	-1	3	-1	-1	3	3	-1	-1	-1	-1	-1	3
regulation-of-DNA-dependent-DNA-replication-initiation:3	3	3	-1	-1	-1	-1	-1	-1	-1	-1	-1	-1	-1	-1	-1
regulation-of-DNA-metabolic-process:3	-1	-1	3	-1	3	-1	-1	3	3	-1	-1	-1	-1	-1	-1
regulation-of-DNA-replication:3	-1	-1	3	-1	3	-1	-1	3	3	-1	-1	-1	-1	-1	-1
regulation-of-GTP-catabolic-process:3	-1	3	3	-1	3	-1	-1	3	3	-1	3	-1	-1	-1	-1
regulation-of-GTPase-activity:3	-1	3	3	-1	3	-1	-1	3	3	-1	3	-1	-1	-1	-1
regulation-of-RNA-metabolic-process:3	3	3	3	3	3	3	3	3	3	3	3	-1	-1	3	3
regulation-of-Rab-GTPase-activity:3	-1	3	3	-1	-1	-1	-1	3	-1	-1	-1	-1	-1	-1	-1
regulation-of-Rab-protein-signal-transduction:3	-1	3	3	-1	-1	-1	-1	3	-1	-1	-1	-1	-1	-1	-1
regulation-of-Ras-GTPase-activity:3	-1	3	-1	-1	3	-1	-1	3	-1	-1	-1	-1	-1	-1	-1
regulation-of-Ras-protein-signal-transduction:3	-1	3	3	3	-1	-1	-1	-1	3	-1	3	-1	-1	-1	-1
regulation-of-SNARE-complex-assembly:3	3	3	-1	-1	3	-1	-1	-1	-1	-1	-1	-1	-1	-1	-1
regulation-of-actin-cytoskeleton-organization:3	-1	-1	-1	-1	-1	-1	-1	-1	-1	-1	-1	3	-1	-1	-1
regulation-of-actin-filament-based-process:3	-1	-1	-1	-1	-1	-1	-1	-1	-1	-1	-1	3	-1	-1	-1
regulation-of-actin-filament-length:3	-1	-1	-1	-1	-1	-1	-1	-1	-1	-1	-1	3	-1	-1	-1
regulation-of-actin-filament-polymerization:3	-1	-1	-1	-1	-1	-1	-1	-1	-1	-1	-1	3	-1	-1	-1
regulation-of-actin-polymerization-or-depolymerization:3	-1	-1	-1	-1	-1	-1	-1	-1	-1	-1	-1	3	-1	-1	-1
regulation-of-biological-process:3	3	3	3	3	3	3	3	3	3	3	3	-1	-1	3	3
regulation-of-biological-quality:3	-1	-1	-1	-1	-1	-1	-1	-1	-1	3	3	-1	-1	-1	-1
regulation-of-biosynthetic-process:3	3	3	3	3	3	3	3	3	3	3	3	-1	-1	3	3
regulation-of-catabolic-process:3	-1	3	-1	-1	3	-1	-1	-1	-1	-1	-1	-1	-1	-1	-1
regulation-of-catalytic-activity:3	-1	3	-1	-1	3	-1	-1	-1	3	-1	-1	-1	-1	-1	-1
regulation-of-cell-cycle:3	3	3	3	-1	3	-1	-1	3	3	3	3	-1	-1	-1	3
regulation-of-cell-cycle-arrest:3	3	3	3	-1	3	-1	-1	3	3	3	3	-1	-1	-1	3
regulation-of-cell-cycle-process:3	3	3	3	-1	3	-1	-1	3	3	3	3	-1	-1	-1	3
regulation-of-cell-morphogenesis:3	-1	-1	-1	-1	-1	-1	-1	-1	-1	-1	-1	-1	-1	3	-1
regulation-of-cellular-biosynthetic-process:3	3	3	3	3	3	3	3	3	3	3	3	-1	-1	3	3
regulation-of-cellular-catabolic-process:3	-1	3	3	-1	3	-1	-1	-1	-1	-1	-1	-1	-1	-1	-1
regulation-of-cellular-component-organization:3	3	3	3	-1	3	3	-1	-1	-1	-1	-1	-1	-1	-1	-1
regulation-of-cellular-localization:3	-1	-1	-1	-1	3	-1	-1	-1	-1	-1	-1	-1	-1	-1	-1
regulation-of-cellular-macromolecule-biosynthetic-process:3	3	3	3	3	3	3	3	3	3	3	3	-1	-1	3	3
regulation-of-cellular-metabolic-process:3	3	3	3	3	3	3	-1	3	3	3	3	-1	-1	3	3
regulation-of-cellular-pH:3	-1	-1	3	-1	3	3	3	3	3	3	3	-1	-1	3	3
regulation-of-cellular-process:3	3	3	3	3	3	3	3	3	3	3	3	-1	-1	3	3
regulation-of-cyclin-dependent-protein-kinase-activity:3	-1	3	-1	-1	-1	-1	-1	-1	-1	-1	-1	-1	-1	-1	-1
regulation-of-cytoskeleton-organization:3	-1	-1	-1	-1	-1	-1	-1	-1	-1	-1	-1	3	-1	-1	-1
regulation-of-exit-from-mitosis:3	-1	-1	-1	-1	3	-1	-1	-1	-1	3	3	-1	-1	-1	-1
regulation-of-gene-expression:3	3	3	3	3	3	3	3	3	3	3	3	-1	-1	3	3
regulation-of-gene-expression,-epigenetic:3	-1	-1	3	3	3	-1	-1	3	3	3	3	-1	-1	-1	3
regulation-of-glucan-biosynthetic-process:3	-1	-1	-1	-1	3	3	-1	-1	-1	-1	-1	-1	-1	-1	-1
regulation-of-glycogen-biosynthetic-process:3	-1	-1	-1	-1	3	3	-1	-1	-1	-1	-1	-1	-1	-1	-1
regulation-of-glycogen-metabolic-process:3	-1	-1	-1	-1	3	3	-1	-1	-1	-1	-1	-1	-1	-1	-1
regulation-of-hydrolase-activity:3	-1	3	-1	-1	3	-1	-1	-1	-1	-1	-1	-1	-1	-1	-1
regulation-of-intracellular-pH:3	-1	-1	3	-1	3	3	3	3	3	3	3	-1	-1	3	3
regulation-of-localization:3	3	3	3	-1	3	3	-1	3	3	-1	3	-1	-1	-1	-1
regulation-of-macromolecule-biosynthetic-process:3	3	3	3	3	3	3	3	3	3	3	3	-1	-1	3	3
regulation-of-macromolecule-metabolic-process:3	3	3	3	3	3	3	-1	3	3	3	3	-1	-1	3	3
regulation-of-meiosis-I:3	-1	-1	-1	3	-1	-1	-1	-1	-1	-1	-1	-1	-1	-1	-1
regulation-of-metabolic-process:3	3	3	3	3	3	3	-1	3	3	3	3	-1	-1	-1	3
regulation-of-microtubule-based-process:3	-1	-1	3	-1	3	-1	-1	-1	3	-1	-1	-1	-1	-1	-1
regulation-of-microtubule-cytoskeleton-organization:3	-1	-1	3	-1	3	-1	-1	-1	3	-1	-1	-1	-1	-1	-1
regulation-of-microtubule-polymerization-or-depolymerization:3	-1	-1	-1	-1	-1	-1	-1	3	3	-1	-1	-1	-1	-1	-1
regulation-of-mitosis:3	3	-1	-1	-1	3	-1	-1	-1	-1	3	-1	-1	-1	-1	-1
regulation-of-mitotic-cell-cycle:3	-1	-1	3	-1	3	-1	-1	-1	3	3	3	-1	-1	-1	3
regulation-of-molecular-function:3	-1	3	-1	-1	3	-1	-1	-1	-1	-1	-1	-1	-1	-1	-1
regulation-of-nitrogen-compound-metabolic-process:3	3	3	3	3	3	3	3	3	3	3	3	-1	-1	3	3
regulation-of-nuclear-division:3	3	-1	-1	-1	3	-1	-1	-1	-1	3	-1	-1	-1	-1	-1
regulation-of-nucleobase,-nucleoside,-nucleotide-and-nucleic-acid-metabolic-process:3	3	3	3	3	3	3	3	3	3	3	3	-1	-1	3
regulation-of-nucleotide-catabolic-process:3	-1	3	3	-1	3	-1	-1	-1	-1	-1	-1	-1	-1	-1	-1
regulation-of-nucleotide-metabolic-process:3	-1	3	3	-1	3	-1	-1	3	3	-1	3	-1	-1	-1	-1
regulation-of-organelle-organization:3	3	3	3	-1	3	-1	-1	3	3	3	3	-1	-1	3	-1
regulation-of-pH:3	-1	-1	3	-1	3	3	3	3	3	3	3	-1	-1	3	3
regulation-of-polysaccharide-biosynthetic-process:3	-1	-1	-1	-1	3	3	-1	-1	-1	-1	-1	-1	-1	-1	-1
regulation-of-polysaccharide-metabolic-process:3	-1	-1	-1	-1	3	3	-1	-1	-1	-1	-1	-1	-1	-1	-1
regulation-of-primary-metabolic-process:3	3	3	3	3	3	3	-1	3	3	3	3	-1	-1	-1	3
regulation-of-protein-modification-process:3	-1	-1	-1	-1	3	-1	-1	-1	-1	-1	-1	-1	-1	-1	-1
regulation-of-protein-polymerization:3	-1	-1	-1	-1	-1	-1	-1	-1	-1	-1	-1	3	-1	-1	-1
regulation-of-protein-serine/threonine-kinase-activity:3	-1	-1	-1	-1	3	-1	-1	-1	-1	-1	-1	-1	-1	-1	-1
regulation-of-purine-nucleotide-catabolic-process:3	-1	3	3	-1	3	-1	-1	-1	-1	-1	-1	-1	-1	-1	-1
regulation-of-reciprocal-meiotic-recombination:3	-1	-1	-1	3	-1	-1	-1	-1	-1	-1	-1	-1	-1	-1	-1
regulation-of-response-to-stimulus:3	-1	3	3	-1	3	-1	-1	-1	3	-1	3	-1	-1	-1	-1
regulation-of-signal-transduction:3	-1	3	3	-1	3	-1	-1	-1	3	-1	3	-1	-1	-1	3
regulation-of-signaling:3	-1	3	3	-1	3	-1	-1	3	3	-1	3	-1	-1	-1	3
regulation-of-small-GTPase-mediated-signal-transduction:3	-1	3	3	3	3	-1	-1	-1	3	-1	3	-1	-1	-1	-1
regulation-of-transcription,-DNA-dependent:3	3	3	3	3	3	3	3	3	3	3	3	-1	-1	3	3
regulation-of-transcription-from-RNA-polymerase-II-promoter:3	-1	3	3	-1	3	3	-1	3	3	-1	3	-1	-1	3	3
regulation-of-transport:3	3	-1	-1	-1	3	3	-1	-1	-1	-1	-1	-1	-1	-1	-1
regulation-of-transposition:3	-1	-1	3	-1	3	-1	-1	-1	-1	-1	-1	-1	-1	-1	-1
regulation-of-transposition,-RNA-mediated:3	-1	-1	3	-1	3	-1	-1	-1	-1	-1	-1	-1	-1	-1	3
regulation-of-vacuole-fusion,-non-autophagic:3	-1	3	-1	-1	-1	-1	-1	-1	-1	-1	-1	-1	-1	-1	-1
regulation-of-vacuole-organization:3	-1	3	-1	-1	-1	-1	-1	-1	-1	-1	-1	-1	-1	-1	-1
regulation-of-vesicle-fusion:3	3	3	3	-1	3	-1	-1	-1	-1	-1	-1	-1	-1	-1	-1
regulation-of-vesicle-mediated-transport:3	3	3	3	-1	3	3	-1	3	3	-1	3	-1	-1	-1	3
reproduction:3	-1	3	-1	-1	3	-1	-1	-1	-1	-1	-1	-1	-1	-1	-1
reproduction-of-a-single-celled-organism:3	-1	-1	-1	-1	3	-1	-1	-1	-1	-1	-1	-1	-1	-1	-1
reproductive-process:3	-1	3	-1	-1	3	-1	-1	-1	-1	-1	-1	-1	-1	-1	-1
response-to-DNA-damage-stimulus:3	-1	-1	3	3	3	3	-1	3	3	3	3	-1	-1	-1	3
response-to-drug:3	-1	-1	-1	-1	-1	-1	-1	-1	-1	-1	3	-1	-1	-1	-1
response-to-external-stimulus:3	-1	-1	-1	-1	-1	-1	-1	-1	-1	3	-1	-1	-1	-1	-1
response-to-extracellular-stimulus:3	-1	-1	-1	-1	-1	-1	-1	-1	-1	3	-1	-1	-1	-1	-1
response-to-nutrient-levels:3	-1	-1	-1	-1	-1	-1	-1	-1	-1	3	-1	-1	-1	-1	-1
response-to-organic-substance:3	-1	3	3	-1	3	-1	-1	-1	-1	-1	-1	-1	-1	-1	-1
response-to-pheromone:3	-1	3	3	-1	3	-1	-1	-1	-1	-1	-1	-1	-1	-1	-1
response-to-pheromone-involved-in-conjugation-with-cellular-fusion:3	-1	3	3	-1	3	-1	-1	-1	-1	-1	-1	-1	-1	-1	-1
response-to-starvation:3	-1	-1	-1	-1	-1	-1	-1	-1	-1	3	-1	-1	-1	-1	-1
response-to-stimulus:3	-1	3	3	3	3	3	-1	3	3	3	3	-1	-1	-1	3
response-to-stress:3	-1	-1	-1	-1	3	3	-1	-1	3	-1	3	-1	-1	-1	-1
retrograde-transport,-endosome-to-Golgi:3	-1	-1	-1	-1	-1	-1	-1	-1	-1	-1	3	-1	-1	-1	-1
retrograde-vesicle-mediated-transport,-Golgi-to-ER:3	3	3	3	-1	3	-1	-1	3	3	-1	3	-1	-1	-1	3
second-messenger-mediated-signaling:3	-1	-1	-1	3	-1	-1	-1	-1	-1	-1	-1	-1	-1	-1	-1
secretion:3	3	-1	-1	-1	-1	-1	-1	-1	-1	-1	-1	-1	-1	-1	-1
secretion-by-cell:3	3	-1	-1	-1	-1	-1	-1	-1	-1	-1	-1	-1	-1	-1	-1
sexual-reproduction:3	-1	3	-1	-1	3	-1	-1	-1	-1	-1	-1	-1	-1	-1	-1
signal-transduction:3	-1	3	3	-1	3	-1	-1	-1	-1	-1	-1	-1	-1	-1	-1
signaling:3	-1	-1	3	-1	3	-1	-1	-1	-1	-1	-1	-1	-1	-1	-1
sister-chromatid-cohesion:3	-1	-1	3	-1	3	-1	-1	3	3	-1	3	-1	-1	-1	3
sister-chromatid-segregation:3	-1	3	3	-1	3	-1	-1	3	3	3	3	-1	-1	-1	3
spindle-assembly-checkpoint:3	-1	-1	-1	-1	-1	-1	-1	-1	-1	3	-1	-1	-1	-1	-1
spindle-checkpoint:3	3	-1	3	-1	3	-1	-1	3	3	3	3	-1	-1	3	-1
spindle-elongation:3	-1	-1	3	-1	-1	-1	-1	-1	3	-1	-1	-1	-1	-1	-1
spindle-organization:3	-1	3	3	-1	3	-1	-1	3	3	-1	3	-1	-1	-1	-1
steroid-biosynthetic-process:3	-1	-1	3	-1	-1	-1	-1	-1	-1	-1	-1	-1	-1	-1	-1
steroid-metabolic-process:3	-1	-1	3	-1	-1	-1	-1	-1	-1	-1	-1	-1	-1	-1	-1
sterol-biosynthetic-process:3	-1	-1	3	-1	-1	-1	-1	-1	-1	-1	-1	-1	-1	-1	-1
sterol-metabolic-process:3	-1	-1	3	-1	-1	-1	-1	-1	-1	-1	-1	-1	-1	-1	-1
tRNA-gene-clustering:3	-1	-1	-1	-1	3	-1	-1	3	3	-1	3	-1	-1	-1	-1
telomere-maintenance:3	-1	-1	3	-1	-1	-1	-1	-1	-1	-1	-1	-1	-1	-1	-1
telomere-organization:3	-1	-1	3	-1	-1	-1	-1	-1	-1	-1	-1	-1	-1	-1	-1
transcription,-DNA-dependent:3	3	3	3	3	3	3	3	3	3	-1	3	-1	-1	3	3
transcription-elongation,-DNA-dependent:3	-1	3	3	-1	3	3	-1	3	3	-1	3	-1	-1	3	3
transcription-elongation-from-RNA-polymerase-II-promoter:3	-1	3	3	-1	3	3	-1	3	3	-1	3	-1	-1	3	3
transcription-from-RNA-polymerase-II-promoter:3	3	3	3	3	3	3	3	3	3	3	3	-1	-1	3	3
transcription-initiation,-DNA-dependent:3	3	-1	3	-1	3	-1	-1	3	-1	-1	-1	-1	-1	-1	-1
transcription-initiation-from-RNA-polymerase-II-promoter:3	3	-1	3	-1	3	-1	3	3	3	-1	3	-1	-1	-1	-1
translation:3	3	-1	-1	-1	-1	-1	-1	-1	-1	-1	-1	-1	-1	-1	-1
transport:3	3	3	3	-1	3	3	3	3	3	3	3	3	-1	3	3
vacuolar-acidification:3	3	-1	3	-1	-1	3	3	3	3	-1	3	-1	-1	3	3
vacuolar-transport:3	3	3	-1	-1	-1	-1	-1	-1	-1	3	3	-1	-1	-1	-1
vacuole-organization:3	-1	3	-1	-1	-1	-1	-1	-1	-1	-1	-1	-1	-1	-1	-1
vesicle-docking:3	3	-1	3	-1	3	-1	-1	-1	3	-1	3	-1	-1	-1	-1
vesicle-docking-involved-in-exocytosis:3	3	-1	-1	-1	3	-1	-1	-1	-1	-1	-1	-1	-1	-1	-1
vesicle-fusion:3	3	-1	-1	-1	3	-1	-1	3	3	-1	3	-1	-1	-1	-1
vesicle-fusion-with-Golgi-apparatus:3	3	-1	3	-1	3	3	-1	-1	-1	-1	-1	-1	-1	-1	-1
vesicle-mediated-transport:3	3	3	3	-1	3	3	3	3	3	3	3	3	-1	3	3
vesicle-organization:3	3	3	3	-1	3	-1	-1	3	3	-1	3	-1	-1	3	3
:1	-2	-2	-2	-2	-2	-2	-2	-2	-2	-2	-2	-2	-2	-2	-2
ATP-biosynthetic-process:4	-1	4	-1	-1	-1	-1	-1	-1	-1	-1	-1	-1	-1	-1	-1
ATP-metabolic-process:4	-1	4	-1	-1	-1	-1	-1	-1	-1	-1	-1	-1	-1	-1	-1
ATP-synthesis-coupled-electron-transport:4	4	4	-1	-1	-1	-1	-1	-1	-1	-1	-1	-1	-1	-1	-1
ATP-synthesis-coupled-proton-transport:4	-1	4	-1	-1	-1	-1	-1	-1	-1	-1	-1	-1	-1	-1	-1
C-terminal-protein-amino-acid-modification:4	-1	-1	-1	-1	-1	-1	-1	4	4	-1	4	-1	-1	4	4
C-terminal-protein-lipidation:4	-1	-1	-1	-1	-1	-1	-1	-1	-1	-1	-1	-1	-1	4	4
CVT-pathway:4	4	-1	4	-1	-1	-1	-1	4	4	-1	4	-1	-1	-1	4
DNA-duplex-unwinding:4	-1	-1	-1	-1	-1	4	-1	-1	-1	-1	-1	-1	-1	-1	-1
DNA-geometric-change:4	-1	-1	-1	-1	-1	4	-1	-1	-1	-1	-1	-1	-1	-1	-1
ER-associated-protein-catabolic-process:4	4	4	4	4	4	4	-1	4	4	4	4	4	4	4	4
ER-nucleus-signaling-pathway:4	-1	-1	-1	-1	-1	-1	-1	4	-1	-1	-1	-1	-1	-1	-1
ER-to-Golgi-vesicle-mediated-transport:4	-1	-1	-1	-1	-1	-1	-1	-1	-1	4	-1	-1	-1	-1	-1
G-protein-coupled-receptor-protein-signaling-pathway:4	-1	-1	-1	-1	-1	-1	-1	-1	4	-1	-1	-1	-1	-1	-1
Golgi-to-endosome-transport:4	-1	-1	-1	4	-1	-1	-1	-1	-1	-1	-1	-1	-1	-1	-1
Golgi-to-plasma-membrane-transport:4	-1	-1	-1	4	-1	-1	-1	-1	-1	-1	-1	-1	-1	-1	-1
Golgi-vesicle-transport:4	-1	-1	-1	4	-1	4	-1	-1	-1	4	-1	-1	-1	-1	-1
M-phase:4	-1	-1	-1	4	-1	-1	-1	-1	-1	-1	-1	-1	-1	-1	-1
M-phase-of-meiotic-cell-cycle:4	-1	-1	-1	4	-1	-1	4	4	4	-1	-1	-1	-1	-1	-1
M-phase-of-mitotic-cell-cycle:4	-1	-1	-1	4	-1	-1	-1	-1	-1	-1	-1	-1	-1	-1	-1
NADP-metabolic-process:4	-1	4	-1	-1	-1	-1	-1	-1	-1	-1	-1	-1	-1	-1	-1
NADPH-regeneration:4	-1	4	-1	-1	-1	-1	-1	-1	-1	-1	-1	-1	-1	-1	-1
acetyl-CoA-catabolic-process:4	-1	-1	4	-1	-1	-1	-1	-1	-1	-1	-1	-1	-1	-1	-1
actin-cortical-patch-assembly:4	4	4	4	-1	4	-1	-1	-1	-1	-1	-1	-1	-1	-1	-1
actin-cortical-patch-localization:4	-1	-1	4	4	4	4	-1	4	-1	4	4	-1	-1	-1	4
actin-cytoskeleton-organization:4	4	4	4	4	4	4	4	4	4	4	4	-1	-1	4	4
actin-filament-based-process:4	4	4	4	4	4	4	-1	4	4	-1	4	-1	-1	4	4
actin-filament-bundle-assembly:4	-1	-1	4	-1	4	-1	-1	-1	-1	-1	-1	4	-1	4	4
actin-filament-organization:4	4	4	4	4	4	-1	-1	4	4	4	4	-1	-1	4	4
actin-polymerization-or-depolymerization:4	4	-1	4	-1	4	-1	-1	4	4	4	4	-1	-1	-1	4
activation-of-protein-kinase-activity:4	-1	-1	4	-1	4	-1	-1	-1	-1	-1	-1	-1	-1	-1	-1
aerobic-respiration:4	4	4	-1	-1	-1	-1	-1	-1	-1	-1	-1	-1	-1	-1	-1
aging:4	-1	-1	-1	-1	-1	-1	-1	4	-1	-1	-1	-1	-1	-1	4
alcohol-catabolic-process:4	-1	-1	-1	-1	4	-1	-1	-1	-1	-1	4	-1	-1	-1	-1
allantoin-catabolic-process:4	4	-1	-1	-1	-1	-1	-1	-1	-1	-1	-1	-1	-1	-1	-1
allantoin-metabolic-process:4	4	-1	-1	-1	-1	-1	-1	-1	-1	-1	-1	-1	-1	-1	-1
anaphase-promoting-complex-dependent-proteasomal-ubiquitin-dependent-protein-catabolic-process:4	-1	-1	-1	4	-1	-1	-1	-1	-1	4	-1	-1	-1	-1	-1
anatomical-structure-development:4	-1	-1	4	4	-1	-1	4	4	4	4	4	-1	-1	-1	4
anatomical-structure-formation-involved-in-morphogenesis:4	4	-1	4	4	-1	-1	4	4	4	4	4	-1	-1	-1	4
anatomical-structure-morphogenesis:4	-1	-1	4	4	-1	-1	4	4	4	4	4	-1	-1	-1	4
ascospore-formation:4	4	-1	4	-1	-1	-1	-1	4	4	-1	4	-1	-1	-1	-1
ascospore-type-prospore-formation:4	-1	-1	-1	-1	-1	-1	-1	4	-1	-1	-1	-1	-1	-1	-1
ascospore-wall-assembly:4	-1	-1	4	-1	-1	-1	-1	4	4	4	-1	-1	-1	-1	-1
ascospore-wall-biogenesis:4	-1	-1	4	-1	-1	-1	-1	4	4	4	-1	-1	-1	-1	-1
asexual-reproduction:4	-1	-1	-1	4	-1	-1	-1	-1	-1	4	-1	-1	-1	-1	-1
attachment-of-spindle-microtubules-to-chromosome:4	-1	-1	-1	4	-1	-1	-1	-1	-1	-1	-1	-1	-1	-1	-1
autophagic-vacuole-assembly:4	-1	-1	-1	-1	4	4	4	4	4	-1	4	-1	4	4	4
autophagy:4	4	-1	4	4	4	4	4	4	4	-1	4	-1	4	4	4
biological-adhesion:4	-1	-1	-1	-1	-1	-1	-1	4	-1	-1	-1	-1	-1	-1	-1
biological-regulation:4	-1	-1	-1	4	-1	-1	-1	-1	-1	-1	-1	-1	-1	-1	-1
bipolar-cellular-bud-site-selection:4	-1	-1	-1	4	4	-1	-1	-1	-1	-1	-1	-1	-1	-1	-1
budding-cell-isotropic-bud-growth:4	-1	-1	-1	-1	-1	-1	-1	-1	-1	4	-1	-1	-1	-1	-1
carbohydrate-catabolic-process:4	-1	4	-1	-1	-1	-1	-1	-1	-1	-1	-1	-1	-1	-1	-1
carbohydrate-metabolic-process:4	-1	-1	-1	-1	-1	-1	-1	-1	-1	4	-1	-1	-1	-1	-1
carbon-catabolite-regulation-of-transcription:4	-1	-1	-1	-1	-1	-1	-1	4	4	-1	-1	-1	-1	-1	-1
carboxylic-acid-catabolic-process:4	-1	4	-1	-1	-1	-1	-1	-1	-1	-1	-1	-1	-1	-1	-1
carboxylic-acid-metabolic-process:4	-1	4	-1	-1	-1	-1	-1	-1	-1	-1	-1	-1	-1	-1	-1
catabolic-process:4	4	4	4	4	4	4	4	4	4	4	4	4	4	4	4
cation-homeostasis:4	-1	4	-1	-1	-1	-1	-1	-1	-1	-1	-1	-1	-1	-1	-1
cation-transport:4	-1	4	-1	-1	-1	-1	-1	-1	-1	-1	-1	-1	-1	-1	-1
cell-adhesion:4	-1	-1	-1	-1	-1	-1	-1	4	-1	-1	-1	-1	-1	-1	-1
cell-aging:4	-1	-1	-1	-1	-1	-1	-1	4	-1	-1	-1	-1	-1	-1	4
cell-budding:4	-1	-1	-1	4	-1	-1	-1	-1	-1	4	-1	-1	-1	-1	-1
cell-communication:4	4	-1	4	4	4	4	4	4	4	-1	4	-1	-1	4	4
cell-cycle:4	-1	-1	-1	4	-1	-1	-1	-1	-1	-1	-1	-1	-1	-1	-1
cell-cycle-cytokinesis:4	-1	-1	-1	4	-1	-1	-1	-1	-1	-1	-1	-1	-1	-1	-1
cell-cycle-phase:4	-1	-1	-1	4	-1	-1	-1	-1	-1	-1	-1	-1	-1	-1	-1
cell-cycle-process:4	-1	-1	-1	4	-1	-1	-1	-1	-1	-1	-1	-1	-1	-1	-1
cell-development:4	4	-1	4	-1	-1	-1	-1	4	4	-1	4	-1	-1	-1	-1
cell-differentiation:4	4	-1	4	4	-1	-1	4	4	4	-1	4	-1	-1	-1	-1
cell-division:4	-1	-1	-1	4	-1	-1	-1	-1	-1	-1	-1	-1	-1	-1	-1
cell-redox-homeostasis:4	-1	4	4	-1	-1	-1	-1	-1	-1	-1	-1	-1	-1	4	-1
cell-surface-receptor-linked-signaling-pathway:4	-1	-1	-1	-1	-1	-1	-1	-1	4	-1	-1	-1	-1	-1	-1
cell-wall-assembly:4	-1	-1	4	-1	-1	-1	-1	4	-1	4	-1	-1	-1	-1	-1
cell-wall-biogenesis:4	-1	-1	-1	-1	-1	-1	-1	-1	-1	4	-1	-1	-1	-1	-1
cell-wall-organization:4	-1	-1	4	4	-1	-1	-1	-1	-1	-1	-1	-1	-1	-1	-1
cell-wall-organization-or-biogenesis:4	-1	-1	4	4	-1	-1	-1	-1	-1	-1	-1	-1	-1	-1	-1
cellular-amide-catabolic-process:4	4	-1	-1	-1	-1	-1	-1	-1	-1	-1	-1	-1	-1	-1	-1
cellular-amino-acid-metabolic-process:4	-1	4	-1	-1	-1	-1	-1	-1	-1	-1	-1	-1	-1	-1	-1
cellular-bud-site-selection:4	-1	-1	-1	4	-1	-1	-1	-1	-1	-1	-1	-1	-1	-1	-1
cellular-carbohydrate-biosynthetic-process:4	-1	-1	-1	-1	-1	-1	-1	-1	-1	4	-1	-1	-1	-1	-1
cellular-carbohydrate-catabolic-process:4	-1	4	-1	-1	-1	-1	-1	-1	-1	-1	-1	-1	-1	-1	-1
cellular-carbohydrate-metabolic-process:4	-1	-1	-1	-1	-1	-1	-1	-1	-1	4	-1	-1	-1	-1	-1
cellular-catabolic-process:4	4	4	4	4	4	4	4	4	4	4	4	4	4	4	4
cellular-cell-wall-organization:4	-1	-1	4	4	-1	-1	-1	-1	-1	-1	-1	-1	-1	-1	-1
cellular-cell-wall-organization-or-biogenesis:4	-1	-1	4	4	-1	-1	-1	-1	-1	-1	-1	-1	-1	-1	-1
cellular-component-assembly:4	-1	-1	4	-1	-1	-1	-1	-1	-1	-1	-1	-1	4	4	-1
cellular-component-assembly-at-cellular-level:4	-1	-1	4	-1	-1	-1	-1	-1	-1	-1	-1	-1	4	4	-1
cellular-component-assembly-involved-in-morphogenesis:4	-1	-1	4	-1	-1	-1	-1	4	4	4	4	-1	-1	-1	-1
cellular-component-morphogenesis:4	-1	-1	4	-1	-1	-1	-1	4	4	4	4	-1	-1	-1	-1
cellular-component-organization:4	-1	4	-1	4	-1	-1	-1	-1	-1	-1	-1	-1	4	-1	-1
cellular-component-organization-at-cellular-level:4	-1	4	-1	4	-1	-1	-1	-1	-1	-1	-1	-1	4	-1	-1
cellular-component-organization-or-biogenesis:4	-1	-1	-1	4	-1	-1	-1	-1	-1	-1	-1	-1	4	-1	-1
cellular-component-organization-or-biogenesis-at-cellular-level:4	-1	-1	-1	4	-1	-1	-1	-1	-1	-1	-1	-1	4	-1	-1
cellular-developmental-process:4	-1	-1	4	4	-1	-1	4	4	4	4	4	-1	-1	-1	-1
cellular-glucan-metabolic-process:4	-1	-1	-1	-1	-1	-1	-1	4	4	-1	4	-1	-1	-1	4
cellular-homeostasis:4	-1	4	4	-1	-1	-1	-1	-1	-1	-1	-1	-1	-1	4	-1
cellular-ion-homeostasis:4	-1	4	-1	-1	-1	-1	-1	-1	-1	-1	-1	-1	-1	-1	-1
cellular-ketone-metabolic-process:4	-1	4	-1	-1	-1	-1	-1	-1	-1	-1	-1	-1	-1	-1	-1
cellular-lipid-catabolic-process:4	-1	-1	-1	-1	-1	-1	-1	-1	-1	4	-1	-1	-1	-1	-1
cellular-localization:4	-1	-1	-1	4	-1	4	-1	-1	-1	4	-1	-1	-1	-1	-1
cellular-macromolecular-complex-assembly:4	-1	-1	-1	-1	-1	-1	-1	-1	-1	-1	-1	-1	4	-1	-1
cellular-macromolecular-complex-subunit-organization:4	-1	-1	-1	-1	-1	-1	-1	-1	-1	-1	-1	-1	4	-1	-1
cellular-macromolecule-catabolic-process:4	4	4	4	4	4	4	4	4	4	4	4	4	4	4	4
cellular-macromolecule-localization:4	-1	-1	-1	4	-1	-1	-1	-1	-1	-1	-1	-1	-1	-1	-1
cellular-membrane-fusion:4	-1	-1	-1	4	-1	4	-1	-1	-1	4	-1	-1	-1	-1	-1
cellular-membrane-organization:4	4	4	4	4	4	4	4	4	4	4	4	-1	-1	4	4
cellular-nitrogen-compound-catabolic-process:4	4	-1	-1	-1	-1	-1	-1	-1	-1	-1	-1	-1	-1	-1	-1
cellular-polysaccharide-biosynthetic-process:4	-1	-1	-1	-1	-1	-1	-1	-1	-1	4	-1	-1	-1	-1	-1
cellular-polysaccharide-metabolic-process:4	-1	-1	-1	-1	-1	-1	-1	-1	-1	-1	-1	-1	-1	-1	4
cellular-process-involved-in-reproduction:4	4	-1	4	4	-1	4	-1	4	4	-1	4	-1	-1	-1	-1
cellular-protein-catabolic-process:4	4	4	4	4	4	4	4	4	4	4	4	4	4	4	4
cellular-protein-complex-assembly:4	4	4	4	-1	4	-1	4	-1	4	-1	4	-1	4	4	4
cellular-protein-localization:4	-1	-1	-1	4	-1	-1	-1	-1	-1	-1	-1	-1	-1	-1	-1
cellular-protein-metabolic-process:4	-1	4	-1	4	-1	-1	-1	-1	-1	4	-1	-1	4	4	4
cellular-respiration:4	4	4	-1	-1	-1	-1	-1	-1	-1	-1	-1	-1	-1	-1	-1
cellular-response-to-abiotic-stimulus:4	-1	-1	-1	4	-1	-1	-1	-1	-1	-1	-1	-1	-1	-1	-1
cellular-response-to-biotic-stimulus:4	-1	-1	-1	-1	4	-1	-1	4	4	-1	4	-1	-1	4	4
cellular-response-to-chemical-stimulus:4	4	-1	-1	-1	4	4	-1	4	4	-1	4	-1	-1	4	4
cellular-response-to-external-stimulus:4	4	-1	4	4	4	4	4	4	4	-1	4	-1	-1	4	4
cellular-response-to-extracellular-stimulus:4	4	-1	4	4	4	4	4	4	4	-1	4	-1	-1	4	4
cellular-response-to-nutrient:4	-1	-1	-1	-1	-1	4	-1	4	-1	-1	-1	-1	-1	-1	-1
cellular-response-to-nutrient-levels:4	4	-1	4	4	4	4	4	4	4	-1	4	-1	-1	4	4
cellular-response-to-organic-substance:4	-1	-1	-1	-1	-1	-1	-1	4	4	-1	4	-1	-1	4	-1
cellular-response-to-osmotic-stress:4	-1	-1	-1	4	-1	-1	-1	-1	-1	-1	-1	-1	-1	-1	-1
cellular-response-to-oxidative-stress:4	-1	4	-1	-1	-1	-1	-1	-1	-1	-1	-1	-1	-1	-1	-1
cellular-response-to-protein-stimulus:4	-1	-1	-1	-1	4	-1	-1	4	4	-1	4	-1	-1	4	4
cellular-response-to-starvation:4	-1	-1	4	4	4	4	4	4	4	-1	4	-1	-1	4	4
cellular-response-to-stimulus:4	-1	-1	-1	4	4	4	4	4	4	-1	4	-1	-1	4	4
cellular-response-to-stress:4	-1	-1	-1	4	-1	-1	-1	4	4	-1	4	-1	-1	-1	4
cellular-response-to-unfolded-protein:4	-1	-1	-1	-1	-1	-1	-1	4	-1	-1	-1	-1	-1	-1	-1
chromatin-modification:4	-1	-1	-1	4	-1	-1	-1	-1	-1	-1	-1	-1	-1	-1	-1
chromatin-organization:4	-1	-1	-1	4	-1	-1	-1	-1	-1	-1	-1	-1	-1	-1	-1
chromosome-organization:4	-1	-1	-1	4	-1	-1	-1	-1	-1	-1	-1	-1	-1	-1	-1
chromosome-segregation:4	-1	-1	-1	4	-1	-1	-1	-1	-1	-1	-1	-1	-1	-1	-1
chronological-cell-aging:4	4	-1	-1	4	-1	-1	-1	4	4	-1	4	-1	-1	4	4
coenzyme-catabolic-process:4	-1	-1	4	-1	-1	-1	-1	-1	-1	-1	-1	-1	-1	-1	-1
cofactor-catabolic-process:4	-1	-1	4	-1	-1	-1	-1	-1	-1	-1	-1	-1	-1	-1	-1
cofactor-metabolic-process:4	-1	4	-1	-1	-1	-1	-1	-1	-1	-1	-1	-1	-1	-1	-1
conjugation:4	-1	-1	-1	4	-1	4	-1	4	4	-1	4	-1	-1	-1	-1
conjugation-with-cellular-fusion:4	-1	-1	-1	4	-1	4	-1	4	4	-1	4	-1	-1	-1	-1
copper-ion-transport:4	-1	-1	4	-1	-1	-1	-1	-1	-1	-1	-1	-1	-1	-1	-1
cortical-actin-cytoskeleton-organization:4	4	4	4	-1	4	-1	-1	-1	-1	-1	-1	-1	-1	-1	-1
cortical-cytoskeleton-organization:4	4	4	4	-1	4	-1	-1	-1	-1	-1	-1	-1	-1	-1	-1
covalent-chromatin-modification:4	-1	-1	-1	4	-1	-1	-1	-1	-1	-1	-1	-1	-1	-1	-1
cyclin-catabolic-process:4	-1	-1	-1	-1	-1	-1	-1	-1	-1	4	-1	-1	-1	-1	-1
cytokinesis,-site-selection:4	-1	-1	-1	4	-1	-1	-1	-1	-1	-1	-1	-1	-1	-1	-1
cytoskeleton-organization:4	-1	-1	4	4	4	-1	4	-1	-1	-1	-1	-1	4	4	-1
developmental-process:4	4	-1	-1	4	-1	-1	-1	4	4	4	4	-1	-1	-1	4
developmental-process-involved-in-reproduction:4	-1	-1	-1	-1	-1	-1	-1	4	-1	-1	-1	-1	-1	-1	-1
double-strand-break-repair:4	-1	-1	-1	4	-1	-1	-1	-1	-1	-1	-1	-1	-1	-1	-1
early-endosome-to-Golgi-transport:4	-1	-1	-1	-1	-1	4	-1	-1	-1	-1	-1	-1	-1	-1	-1
electron-transport-chain:4	4	4	-1	-1	-1	-1	-1	-1	-1	-1	-1	-1	-1	-1	-1
endocytosis:4	4	4	4	4	4	4	-1	4	4	4	4	-1	-1	-1	4
endoplasmic-reticulum-unfolded-protein-response:4	-1	-1	-1	-1	-1	-1	-1	4	-1	-1	-1	-1	-1	-1	-1
endosome-transport:4	-1	4	4	4	4	4	-1	-1	-1	4	-1	-1	-1	-1	4
endosome-transport-via-multivesicular-body-sorting-pathway:4	-1	-1	-1	-1	-1	4	-1	-1	-1	-1	-1	-1	-1	-1	-1
energy-coupled-proton-transport,-down-electrochemical-gradient:4	-1	4	-1	-1	-1	-1	-1	-1	-1	-1	-1	-1	-1	-1	-1
energy-derivation-by-oxidation-of-organic-compounds:4	4	4	-1	-1	-1	-1	-1	-1	-1	-1	-1	-1	-1	-1	-1
energy-reserve-metabolic-process:4	-1	-1	-1	-1	-1	-1	-1	-1	4	-1	4	-1	-1	4	4
establishment-of-cell-polarity:4	-1	-1	-1	4	-1	-1	-1	-1	-1	4	-1	-1	-1	-1	-1
establishment-of-localization:4	-1	4	-1	-1	-1	4	-1	-1	-1	4	-1	-1	-1	-1	-1
establishment-of-localization-in-cell:4	-1	-1	-1	4	-1	4	-1	-1	-1	4	-1	-1	-1	-1	-1
establishment-of-protein-localization:4	-1	-1	-1	4	-1	4	-1	-1	-1	4	4	-1	-1	-1	-1
establishment-of-protein-localization-to-organelle:4	-1	-1	-1	-1	-1	-1	-1	-1	4	-1	4	-1	-1	-1	4
establishment-of-protein-localization-to-vacuole:4	4	-1	4	4	4	4	-1	4	4	-1	4	-1	-1	4	4
establishment-or-maintenance-of-cell-polarity:4	-1	-1	-1	4	-1	-1	-1	-1	-1	4	-1	-1	-1	-1	-1
exocytosis:4	-1	-1	-1	4	-1	-1	-1	4	-1	4	4	-1	-1	-1	4
external-encapsulating-structure-organization:4	-1	-1	4	4	-1	-1	-1	-1	-1	-1	-1	-1	-1	-1	-1
fungal-type-cell-wall-assembly:4	-1	-1	4	-1	-1	-1	-1	4	4	4	-1	-1	-1	-1	-1
fungal-type-cell-wall-biogenesis:4	4	-1	4	-1	-1	-1	-1	-1	-1	-1	-1	-1	-1	-1	-1
fungal-type-cell-wall-organization:4	-1	-1	-1	4	-1	-1	-1	-1	-1	-1	-1	-1	-1	-1	-1
fungal-type-cell-wall-organization-or-biogenesis:4	4	-1	4	4	-1	-1	-1	-1	-1	-1	-1	-1	-1	-1	-1
generation-of-precursor-metabolites-and-energy:4	4	4	-1	-1	-1	-1	-1	-1	-1	-1	-1	-1	-1	-1	-1
glucan-biosynthetic-process:4	-1	-1	-1	-1	-1	-1	-1	4	4	4	4	-1	-1	-1	-1
glucan-metabolic-process:4	-1	-1	-1	-1	-1	-1	-1	4	4	-1	4	-1	-1	-1	4
glycerol-ether-metabolic-process:4	-1	4	4	-1	-1	-1	-1	-1	-1	-1	-1	-1	-1	-1	-1
glycerolipid-catabolic-process:4	-1	-1	-1	-1	-1	-1	-1	4	4	-1	4	-1	-1	-1	-1
glycogen-biosynthetic-process:4	-1	-1	-1	-1	-1	-1	-1	4	4	4	4	-1	-1	-1	4
glycogen-metabolic-process:4	-1	-1	-1	-1	-1	-1	-1	4	4	-1	4	-1	-1	4	4
glycoside-metabolic-process:4	-1	-1	-1	-1	-1	-1	-1	-1	-1	4	-1	-1	-1	-1	-1
heterocycle-catabolic-process:4	4	-1	-1	-1	-1	-1	-1	-1	-1	-1	-1	-1	-1	-1	-1
heterocycle-metabolic-process:4	-1	4	-1	-1	-1	-1	-1	-1	-1	-1	-1	-1	-1	-1	-1
histone-deacetylation:4	-1	-1	-1	4	-1	-1	-1	-1	-1	-1	-1	-1	-1	-1	-1
histone-modification:4	-1	-1	-1	4	-1	-1	-1	-1	-1	-1	-1	-1	-1	-1	-1
inositol-phosphate-metabolic-process:4	-1	-1	-1	-1	-1	4	-1	-1	-1	-1	-1	-1	-1	-1	-1
intracellular-protein-kinase-cascade:4	-1	-1	-1	4	-1	-1	-1	-1	-1	-1	-1	-1	-1	-1	-1
ion-homeostasis:4	-1	4	-1	-1	-1	-1	-1	-1	-1	-1	-1	-1	-1	-1	-1
ion-transmembrane-transport:4	-1	4	-1	-1	-1	-1	-1	-1	-1	-1	-1	-1	-1	-1	-1
ion-transport:4	-1	4	-1	-1	-1	-1	-1	-1	-1	-1	-1	-1	-1	-1	-1
iron-sulfur-cluster-assembly:4	-1	4	-1	-1	-1	-1	-1	-1	-1	-1	-1	-1	-1	-1	-1
late-endosome-to-vacuole-transport:4	-1	4	4	-1	4	4	-1	-1	4	4	4	-1	-1	-1	4
late-endosome-to-vacuole-transport-via-multivesicular-body-sorting-pathway:4	-1	-1	-1	-1	-1	4	-1	-1	-1	-1	-1	-1	-1	-1	-1
lipid-catabolic-process:4	-1	-1	-1	-1	-1	-1	-1	-1	-1	4	-1	-1	-1	-1	-1
lipid-modification:4	4	-1	-1	-1	-1	-1	-1	-1	-1	-1	-1	-1	-1	-1	-1
localization:4	-1	4	4	4	-1	4	-1	-1	-1	4	-1	-1	-1	-1	-1
macroautophagy:4	-1	-1	4	4	4	4	4	4	4	-1	4	-1	4	4	4
macromolecular-complex-assembly:4	-1	-1	-1	-1	-1	-1	-1	-1	-1	-1	-1	-1	4	-1	-1
macromolecular-complex-subunit-organization:4	-1	-1	-1	-1	-1	-1	-1	-1	-1	-1	-1	-1	4	-1	-1
macromolecule-catabolic-process:4	4	4	4	4	4	4	4	4	4	4	4	4	4	4	4
macromolecule-localization:4	-1	-1	-1	4	-1	4	-1	-1	-1	4	-1	-1	-1	-1	-1
maintenance-of-location:4	-1	4	4	4	4	-1	-1	-1	-1	-1	-1	-1	-1	-1	-1
maintenance-of-location-in-cell:4	-1	4	4	4	4	-1	-1	-1	-1	-1	-1	-1	-1	-1	-1
maintenance-of-protein-location:4	4	4	4	4	4	-1	-1	-1	-1	-1	-1	-1	-1	-1	-1
maintenance-of-protein-location-in-cell:4	-1	-1	4	4	4	-1	-1	-1	-1	-1	-1	-1	-1	-1	-1
meiosis:4	-1	-1	-1	4	-1	-1	4	4	4	-1	-1	-1	-1	-1	-1
meiosis-I:4	-1	-1	-1	-1	4	-1	-1	4	4	-1	4	-1	-1	-1	-1
meiotic-cell-cycle:4	-1	-1	-1	4	-1	-1	4	4	4	-1	-1	-1	-1	-1	-1
membrane-budding:4	-1	-1	-1	-1	-1	-1	-1	-1	-1	4	-1	-1	-1	-1	-1
membrane-docking:4	-1	-1	-1	4	-1	-1	-1	-1	-1	-1	-1	-1	-1	-1	-1
membrane-fusion:4	-1	-1	-1	4	-1	4	-1	-1	-1	4	-1	-1	-1	-1	-1
membrane-invagination:4	4	4	4	4	4	4	4	4	4	4	4	-1	-1	4	4
membrane-organization:4	4	4	4	4	4	4	4	4	4	4	4	-1	-1	4	4
metallo-sulfur-cluster-assembly:4	-1	4	-1	-1	-1	-1	-1	-1	-1	-1	-1	-1	-1	-1	-1
microautophagy:4	-1	-1	4	4	4	4	4	4	4	-1	4	-1	4	4	4
microtubule-anchoring:4	-1	-1	-1	4	-1	-1	-1	-1	-1	-1	-1	-1	-1	-1	-1
microtubule-based-process:4	-1	-1	-1	4	-1	-1	-1	-1	-1	-1	-1	-1	4	-1	-1
microtubule-cytoskeleton-organization:4	-1	-1	-1	4	-1	-1	-1	-1	-1	-1	-1	-1	-1	-1	-1
misfolded-or-incompletely-synthesized-protein-catabolic-process:4	-1	4	4	-1	4	-1	-1	4	4	4	4	-1	-1	4	4
mitochondrial-ATP-synthesis-coupled-electron-transport:4	4	4	-1	-1	-1	-1	-1	-1	-1	-1	-1	-1	-1	-1	-1
mitochondrial-RNA-metabolic-process:4	-1	4	-1	-1	-1	-1	-1	-1	-1	-1	-1	-1	-1	-1	-1
mitochondrial-electron-transport,-ubiquinol-to-cytochrome-c:4	4	-1	-1	-1	-1	-1	-1	-1	-1	-1	-1	-1	-1	-1	-1
mitochondrial-fission:4	-1	-1	-1	-1	-1	-1	-1	-1	-1	-1	-1	-1	4	-1	-1
mitochondrial-respiratory-chain-complex-IV-assembly:4	4	4	4	-1	-1	-1	-1	-1	-1	-1	-1	-1	-1	-1	-1
mitochondrial-respiratory-chain-complex-IV-biogenesis:4	-1	4	-1	-1	-1	-1	-1	-1	-1	-1	-1	4	-1	-1	-1
mitochondrial-respiratory-chain-complex-assembly:4	4	4	-1	-1	-1	-1	-1	-1	-1	-1	-1	-1	-1	-1	-1
mitochondrial-translation:4	-1	4	-1	-1	-1	-1	-1	-1	-1	-1	-1	-1	-1	-1	-1
mitochondrion-degradation:4	4	-1	4	4	4	4	-1	4	4	-1	4	-1	4	4	4
mitochondrion-distribution:4	4	-1	4	-1	4	-1	-1	4	4	4	4	-1	-1	4	-1
mitochondrion-inheritance:4	4	-1	4	-1	4	-1	-1	4	4	4	4	-1	-1	4	-1
mitochondrion-localization:4	4	-1	4	-1	4	-1	-1	4	4	4	4	-1	4	4	-1
mitochondrion-organization:4	-1	4	-1	-1	-1	-1	-1	-1	-1	-1	-1	-1	4	-1	-1
mitosis:4	-1	-1	-1	4	-1	-1	-1	-1	-1	-1	-1	-1	-1	-1	-1
mitotic-cell-cycle:4	-1	-1	-1	4	-1	-1	-1	-1	-1	-1	-1	-1	-1	-1	-1
mitotic-sister-chromatid-segregation:4	-1	-1	-1	4	-1	-1	-1	-1	-1	-1	-1	-1	-1	-1	-1
modification-dependent-macromolecule-catabolic-process:4	4	4	4	4	4	4	4	4	4	4	4	4	4	4	4
modification-dependent-protein-catabolic-process:4	4	4	4	4	4	4	4	4	4	4	4	4	4	4	4
monocarboxylic-acid-metabolic-process:4	-1	4	-1	-1	-1	-1	-1	-1	-1	-1	-1	-1	-1	-1	-1
monosaccharide-catabolic-process:4	-1	-1	-1	-1	4	-1	-1	-1	-1	-1	4	-1	-1	-1	-1
multi-organism-process:4	-1	-1	-1	-1	-1	4	-1	4	4	-1	4	-1	-1	-1	-1
negative-regulation-of-actin-filament-polymerization:4	-1	-1	4	-1	4	-1	-1	4	4	-1	4	-1	-1	-1	4
negative-regulation-of-biological-process:4	-1	-1	-1	4	-1	-1	-1	-1	-1	-1	-1	-1	-1	-1	-1
negative-regulation-of-carbohydrate-metabolic-process:4	-1	4	4	-1	-1	-1	-1	4	4	-1	4	4	-1	4	4
negative-regulation-of-cell-communication:4	-1	-1	-1	-1	-1	4	-1	-1	-1	-1	-1	-1	-1	-1	-1
negative-regulation-of-cellular-carbohydrate-metabolic-process:4	-1	4	4	-1	-1	-1	-1	4	4	-1	4	4	-1	4	4
negative-regulation-of-cellular-component-organization:4	-1	-1	-1	-1	-1	-1	-1	-1	-1	-1	-1	-1	-1	-1	4
negative-regulation-of-cellular-process:4	-1	-1	-1	4	-1	-1	-1	-1	-1	-1	-1	-1	-1	-1	-1
negative-regulation-of-gluconeogenesis:4	-1	4	4	4	4	-1	-1	4	4	4	4	4	-1	4	4
negative-regulation-of-glycogen-biosynthetic-process:4	-1	-1	4	-1	-1	-1	-1	-1	-1	-1	-1	-1	-1	-1	-1
negative-regulation-of-glycogen-metabolic-process:4	-1	-1	4	-1	-1	-1	-1	-1	-1	-1	-1	-1	-1	-1	-1
negative-regulation-of-protein-complex-assembly:4	-1	-1	4	4	4	-1	-1	4	4	-1	4	-1	-1	-1	4
negative-regulation-of-protein-polymerization:4	-1	-1	4	-1	4	-1	-1	4	4	-1	4	-1	-1	-1	4
negative-regulation-of-response-to-stimulus:4	-1	-1	-1	-1	-1	4	-1	-1	-1	-1	-1	-1	-1	-1	-1
negative-regulation-of-signal-transduction:4	-1	-1	-1	-1	-1	4	-1	-1	-1	-1	-1	-1	-1	-1	-1
negative-regulation-of-signaling:4	-1	-1	-1	-1	-1	4	-1	-1	-1	-1	-1	-1	-1	-1	-1
nicotinamide-nucleotide-metabolic-process:4	-1	4	-1	-1	-1	-1	-1	-1	-1	-1	-1	-1	-1	-1	-1
non-recombinational-repair:4	-1	-1	-1	-1	-1	4	-1	-1	-1	-1	-1	-1	-1	4	-1
nuclear-division:4	-1	-1	-1	4	-1	-1	-1	-1	-1	-1	-1	-1	-1	-1	-1
nucleoside-triphosphate-metabolic-process:4	4	-1	-1	-1	-1	-1	-1	-1	-1	-1	-1	-1	-1	-1	-1
organelle-fission:4	-1	-1	-1	4	-1	-1	-1	-1	-1	-1	-1	-1	-1	-1	-1
organelle-fusion:4	-1	-1	-1	4	-1	-1	-1	-1	-1	4	-1	-1	-1	-1	-1
organelle-inheritance:4	-1	-1	4	-1	4	-1	-1	4	4	4	4	-1	-1	-1	-1
organelle-organization:4	-1	4	-1	4	-1	-1	-1	-1	-1	-1	-1	-1	4	-1	-1
organic-acid-catabolic-process:4	-1	4	-1	-1	-1	-1	-1	-1	-1	-1	-1	-1	-1	-1	-1
organic-acid-metabolic-process:4	-1	4	-1	-1	-1	-1	-1	-1	-1	-1	-1	-1	-1	-1	-1
organic-ether-metabolic-process:4	-1	4	4	-1	-1	-1	-1	-1	-1	-1	-1	-1	-1	-1	-1
organophosphate-metabolic-process:4	-1	-1	-1	-1	-1	-1	-1	4	-1	-1	-1	-1	-1	-1	-1
osmosensory-signaling-pathway:4	-1	-1	-1	4	-1	-1	-1	-1	-1	-1	-1	-1	-1	-1	-1
oxidation-reduction-process:4	4	4	4	-1	-1	-1	-1	-1	-1	-1	-1	-1	-1	-1	-1
oxidative-phosphorylation:4	4	4	-1	-1	-1	-1	-1	-1	-1	-1	-1	-1	-1	-1	-1
oxoacid-metabolic-process:4	-1	4	-1	-1	-1	-1	-1	-1	-1	-1	-1	-1	-1	-1	-1
pentose-metabolic-process:4	-1	-1	4	-1	4	-1	-1	4	4	-1	4	-1	-1	-1	-1
pentose-phosphate-shunt:4	-1	4	4	-1	4	-1	-1	-1	-1	-1	4	-1	-1	-1	4
peptide-catabolic-process:4	-1	-1	-1	-1	-1	-1	-1	4	-1	-1	-1	-1	-1	-1	-1
peroxisome-fission:4	-1	-1	-1	-1	-1	-1	-1	-1	-1	-1	-1	-1	4	-1	-1
peroxisome-organization:4	-1	-1	4	4	4	-1	4	-1	-1	-1	4	-1	4	-1	-1
pheromone-dependent-signal-transduction-involved-in-conjugation-with-cellular-fusion:4	-1	-1	-1	-1	-1	-1	-1	4	4	-1	4	-1	-1	-1	-1
piecemeal-microautophagy-of-nucleus:4	4	-1	4	4	4	4	4	4	4	-1	4	-1	4	4	4
polysaccharide-biosynthetic-process:4	-1	-1	-1	-1	-1	-1	-1	-1	-1	4	-1	-1	-1	-1	-1
polysaccharide-metabolic-process:4	-1	-1	-1	-1	-1	-1	-1	-1	-1	-1	4	-1	-1	-1	4
positive-regulation-of-RNA-polymerase-II-transcriptional-preinitiation-complex-assembly:4	4	-1	-1	-1	-1	-1	-1	4	4	4	4	-1	4
positive-regulation-of-catalytic-activity:4	-1	-1	-1	4	-1	-1	-1	-1	-1	-1	-1	-1	-1	-1	-1
positive-regulation-of-kinase-activity:4	-1	-1	4	4	4	-1	-1	-1	-1	-1	-1	-1	-1	-1	-1
positive-regulation-of-molecular-function:4	4	-1	-1	4	-1	-1	-1	-1	-1	-1	-1	-1	-1	-1	-1
positive-regulation-of-protein-catabolic-process:4	-1	-1	-1	-1	-1	-1	-1	-1	-1	-1	-1	-1	-1	-1	4
positive-regulation-of-protein-kinase-activity:4	-1	-1	4	4	4	-1	-1	-1	-1	-1	-1	-1	-1	-1	-1
positive-regulation-of-transcription-from-RNA-polymerase-II-promoter:4	-1	-1	-1	-1	-1	-1	4	-1	-1	-1	-1	-1	-1	-1	-1
positive-regulation-of-transferase-activity:4	-1	-1	4	4	4	-1	-1	-1	-1	-1	-1	-1	-1	-1	-1
post-Golgi-vesicle-mediated-transport:4	-1	-1	-1	4	-1	-1	-1	-1	-1	4	-1	-1	-1	-1	-1
post-translational-protein-modification:4	-1	-1	4	-1	-1	-1	-1	4	4	-1	4	-1	4	4	4
posttranslational-protein-targeting-to-membrane:4	-1	-1	-1	-1	-1	-1	-1	-1	-1	4	-1	-1	-1	-1	-1
posttranslational-protein-targeting-to-membrane,-translocation:4	-1	-1	-1	-1	-1	-1	-1	-1	-1	4	-1	-1	-1	-1	-1
proteasomal-protein-catabolic-process:4	4	4	4	4	4	4	4	4	4	4	4	4	4	4	4
proteasomal-ubiquitin-dependent-protein-catabolic-process:4	4	4	4	4	4	4	4	4	4	4	4	4	4	4	4
proteasomal-ubiquitin-independent-protein-catabolic-process:4	4	4	4	4	4	4	4	4	4	4	4	-1	4	4	4
proteasome-assembly:4	4	4	4	4	4	-1	4	4	4	4	4	-1	4	4	4
proteasome-regulatory-particle-assembly:4	4	4	4	4	4	-1	4	4	4	-1	4	-1	4	4	4
protein-acetylation:4	-1	-1	-1	-1	-1	-1	-1	-1	-1	-1	-1	4	-1	-1	-1
protein-acylation:4	-1	-1	-1	-1	-1	-1	-1	-1	-1	-1	-1	4	-1	-1	-1
protein-catabolic-process:4	4	4	4	4	4	4	4	4	4	4	4	4	4	4	4
protein-complex-assembly:4	4	4	4	-1	4	-1	-1	-1	-1	-1	-1	-1	4	4	4
protein-complex-biogenesis:4	4	4	4	-1	-1	-1	-1	-1	-1	-1	-1	-1	4	4	4
protein-complex-subunit-organization:4	4	4	4	-1	4	-1	-1	-1	-1	-1	-1	-1	4	4	-1
protein-deacetylation:4	-1	-1	-1	4	-1	-1	-1	-1	-1	-1	-1	-1	-1	-1	-1
protein-deacylation:4	-1	-1	-1	4	-1	-1	-1	-1	-1	-1	-1	-1	-1	-1	-1
protein-deubiquitination:4	-1	-1	-1	-1	-1	-1	-1	4	4	-1	4	-1	-1	-1	-1
protein-localization:4	-1	-1	-1	4	-1	4	-1	-1	4	4	4	-1	-1	-1	-1
protein-localization-in-Golgi-apparatus:4	-1	-1	-1	-1	4	-1	-1	-1	-1	-1	-1	-1	-1	-1	-1
protein-localization-to-vacuole:4	4	-1	4	4	4	4	-1	4	4	-1	4	-1	-1	4	4
protein-metabolic-process:4	-1	4	-1	4	-1	-1	-1	-1	4	4	4	-1	4	4	4
protein-modification-by-small-protein-conjugation:4	-1	-1	-1	4	-1	-1	-1	4	4	4	4	-1	4	4	4
protein-modification-by-small-protein-conjugation-or-removal:4	-1	-1	-1	4	4	4	4	4	4	4	4	-1	4	4	4
protein-modification-by-small-protein-removal:4	-1	-1	-1	-1	4	-1	-1	4	4	-1	4	-1	-1	-1	-1
protein-modification-process:4	-1	-1	-1	4	-1	-1	-1	-1	-1	-1	-1	-1	-1	-1	-1
protein-phosphorylation:4	-1	-1	-1	4	-1	-1	-1	-1	-1	-1	-1	-1	-1	-1	-1
protein-polyubiquitination:4	-1	-1	-1	-1	-1	-1	-1	4	4	4	4	-1	-1	4	4
protein-retention-in-Golgi-apparatus:4	-1	-1	4	-1	4	-1	-1	-1	-1	-1	-1	-1	-1	-1	-1
protein-secretion:4	-1	-1	4	-1	4	-1	-1	4	4	-1	4	-1	-1	-1	4
protein-sumoylation:4	-1	-1	-1	-1	-1	-1	-1	-1	-1	4	-1	-1	-1	-1	-1
protein-targeting-to-vacuole:4	4	-1	4	4	4	4	-1	4	4	-1	4	-1	-1	4	4
protein-transport:4	-1	-1	-1	4	-1	4	-1	-1	-1	4	4	-1	-1	-1	-1
protein-ubiquitination:4	-1	-1	-1	4	-1	-1	-1	4	4	4	4	-1	4	4	4
protein-ubiquitination-involved-in-ubiquitin-dependent-protein-catabolic-process:4	-1	-1	-1	-1	-1	-1	-1	4	4	4	4	-1	4	4
proteolysis:4	4	4	4	4	4	4	4	4	4	4	4	4	4	4	4
proteolysis-involved-in-cellular-protein-catabolic-process:4	4	4	4	4	4	4	4	4	4	4	4	4	4	4	4
purine-nucleoside-triphosphate-biosynthetic-process:4	-1	4	-1	-1	-1	-1	-1	-1	-1	-1	-1	-1	-1	-1	-1
purine-nucleoside-triphosphate-metabolic-process:4	4	4	-1	-1	-1	-1	-1	-1	-1	-1	-1	-1	-1	-1	-1
purine-nucleotide-metabolic-process:4	-1	4	-1	-1	-1	-1	-1	-1	-1	-1	-1	-1	-1	-1	-1
purine-ribonucleoside-triphosphate-biosynthetic-process:4	-1	4	-1	-1	-1	-1	-1	-1	-1	-1	-1	-1	-1	-1	-1
purine-ribonucleoside-triphosphate-metabolic-process:4	4	4	-1	-1	-1	-1	-1	-1	-1	-1	-1	-1	-1	-1	-1
purine-ribonucleotide-metabolic-process:4	-1	4	-1	-1	-1	-1	-1	-1	-1	-1	-1	-1	-1	-1	-1
pyridine-nucleotide-metabolic-process:4	-1	4	-1	-1	-1	-1	-1	-1	-1	-1	-1	-1	-1	-1	-1
reactive-oxygen-species-metabolic-process:4	-1	-1	4	-1	-1	-1	-1	-1	-1	-1	-1	-1	-1	-1	-1
reciprocal-DNA-recombination:4	-1	-1	-1	-1	4	-1	-1	4	4	-1	4	-1	-1	-1	-1
reciprocal-meiotic-recombination:4	-1	-1	-1	-1	4	-1	-1	4	4	-1	4	-1	-1	-1	-1
regulation-of-RNA-metabolic-process:4	-1	-1	-1	4	-1	-1	-1	-1	-1	-1	-1	-1	-1	-1	-1
regulation-of-RNA-polymerase-II-transcriptional-preinitiation-complex-assembly:4	4	-1	-1	-1	-1	-1	-1	4	4	4	4	-1	-1	4
regulation-of-actin-cytoskeleton-organization:4	4	4	4	-1	4	-1	-1	4	4	-1	4	-1	-1	-1	4
regulation-of-actin-filament-based-process:4	4	4	4	-1	4	-1	-1	4	4	-1	4	-1	-1	-1	4
regulation-of-actin-filament-length:4	4	4	4	4	4	-1	-1	4	4	-1	4	-1	-1	4	4
regulation-of-actin-filament-polymerization:4	4	4	4	4	4	-1	-1	4	4	-1	4	-1	-1	4	4
regulation-of-actin-polymerization-or-depolymerization:4	4	4	4	4	4	-1	-1	4	4	-1	4	-1	-1	4	4
regulation-of-anatomical-structure-size:4	-1	-1	-1	-1	-1	-1	-1	-1	-1	4	-1	-1	-1	-1	-1
regulation-of-biological-process:4	-1	-1	-1	4	-1	-1	-1	-1	-1	-1	-1	-1	-1	-1	-1
regulation-of-biological-quality:4	4	4	4	-1	-1	-1	-1	-1	-1	-1	-1	-1	-1	4	-1
regulation-of-carbohydrate-biosynthetic-process:4	-1	4	4	4	-1	-1	-1	-1	4	-1	4	4	-1	4	4
regulation-of-carbohydrate-metabolic-process:4	-1	-1	4	4	-1	-1	-1	-1	-1	-1	4	4	-1	4	4
regulation-of-catabolic-process:4	4	-1	-1	4	-1	-1	-1	-1	-1	-1	-1	-1	-1	-1	-1
regulation-of-catalytic-activity:4	4	-1	-1	4	-1	-1	-1	-1	-1	-1	-1	-1	-1	-1	-1
regulation-of-cellular-carbohydrate-metabolic-process:4	-1	4	4	4	-1	-1	-1	-1	-1	-1	4	4	-1	4	4
regulation-of-cellular-component-biogenesis:4	4	-1	4	4	4	-1	-1	4	4	4	4	-1	4	4	4
regulation-of-cellular-component-organization:4	-1	-1	-1	4	-1	-1	-1	-1	-1	-1	-1	-1	-1	-1	4
regulation-of-cellular-component-size:4	-1	-1	-1	-1	-1	-1	-1	-1	-1	4	-1	-1	-1	-1	-1
regulation-of-cellular-ketone-metabolic-process:4	-1	4	-1	-1	-1	-1	-1	4	4	4	4	4	-1	4	4
regulation-of-cellular-metabolic-process:4	-1	-1	-1	4	-1	-1	-1	-1	-1	-1	-1	-1	-1	-1	-1
regulation-of-cellular-process:4	-1	-1	-1	4	-1	-1	-1	-1	-1	-1	-1	-1	-1	-1	-1
regulation-of-conjugation:4	-1	-1	-1	-1	-1	-1	-1	-1	4	-1	-1	-1	-1	-1	-1
regulation-of-conjugation-with-cellular-fusion:4	-1	-1	-1	-1	-1	-1	-1	-1	4	-1	-1	-1	-1	-1	-1
regulation-of-conjugation-with-cellular-fusion-by-signal-transduction:4	-1	-1	-1	-1	-1	-1	-1	4	4	-1	4	-1	-1	-1	-1
regulation-of-generation-of-precursor-metabolites-and-energy:4	4	-1	-1	-1	-1	-1	-1	-1	-1	-1	-1	-1	-1	-1	-1
regulation-of-gluconeogenesis:4	-1	4	-1	4	-1	-1	-1	4	4	4	4	4	-1	4	4
regulation-of-glucose-metabolic-process:4	-1	4	4	4	-1	-1	-1	-1	-1	-1	4	4	-1	4	4
regulation-of-kinase-activity:4	-1	-1	-1	4	-1	-1	-1	-1	-1	-1	-1	-1	-1	-1	-1
regulation-of-lipid-biosynthetic-process:4	-1	-1	4	-1	4	-1	-1	4	4	-1	4	-1	-1	-1	-1
regulation-of-lipid-metabolic-process:4	4	-1	-1	-1	4	-1	-1	-1	4	-1	4	-1	-1	-1	-1
regulation-of-metabolic-process:4	-1	-1	-1	4	-1	-1	-1	-1	-1	-1	-1	-1	-1	-1	-1
regulation-of-molecular-function:4	4	-1	-1	4	-1	-1	-1	-1	-1	-1	4	-1	-1	-1	-1
regulation-of-multi-organism-process:4	-1	-1	-1	-1	-1	-1	-1	-1	4	-1	-1	-1	-1	-1	-1
regulation-of-nitrogen-compound-metabolic-process:4	-1	-1	-1	4	-1	-1	-1	-1	-1	-1	-1	-1	-1	-1	-1
regulation-of-nucleobase,-nucleoside,-nucleotide-and-nucleic-acid-metabolic-process:4	-1	-1	-1	4	-1	-1	-1	-1	-1	-1	-1	-1	-1	-1	-1
regulation-of-phosphate-metabolic-process:4	-1	-1	-1	4	-1	-1	-1	-1	-1	-1	-1	-1	-1	-1	-1
regulation-of-phosphorus-metabolic-process:4	-1	-1	-1	4	-1	-1	-1	-1	-1	-1	-1	-1	-1	-1	-1
regulation-of-phosphorylation:4	-1	-1	-1	4	-1	-1	-1	-1	-1	-1	-1	-1	-1	-1	-1
regulation-of-primary-metabolic-process:4	-1	-1	-1	4	-1	-1	-1	-1	-1	-1	-1	-1	-1	-1	-1
regulation-of-protein-catabolic-process:4	-1	-1	4	-1	-1	-1	-1	4	4	-1	4	-1	4	4	4
regulation-of-protein-complex-assembly:4	4	4	4	4	4	-1	-1	4	4	4	4	-1	4	4	4
regulation-of-protein-kinase-activity:4	-1	-1	-1	4	-1	-1	-1	-1	-1	-1	-1	-1	-1	-1	-1
regulation-of-protein-phosphorylation:4	-1	-1	-1	4	-1	-1	-1	-1	-1	-1	-1	-1	-1	-1	-1
regulation-of-protein-polymerization:4	4	4	4	-1	4	-1	-1	4	4	-1	4	-1	-1	4	4
regulation-of-transcription,-DNA-dependent:4	-1	-1	-1	4	-1	-1	-1	-1	-1	-1	-1	-1	-1	-1	-1
regulation-of-transcription-initiation,-DNA-dependent:4	4	-1	-1	-1	-1	-1	-1	4	4	4	4	-1	-1	4	4
regulation-of-transcription-initiation-from-RNA-polymerase-II-promoter:4	4	-1	-1	-1	-1	-1	-1	4	4	4	4	-1	-1	4	4
regulation-of-transferase-activity:4	-1	-1	-1	4	-1	-1	-1	-1	-1	-1	-1	-1	-1	-1	-1
reproduction:4	4	-1	4	4	4	4	-1	4	4	4	4	-1	-1	-1	-1
reproduction-of-a-single-celled-organism:4	4	-1	4	4	-1	-1	-1	4	4	4	4	-1	-1	-1	-1
reproductive-process:4	4	-1	4	4	-1	4	-1	4	4	-1	4	-1	-1	-1	-1
reproductive-process-in-single-celled-organism:4	4	-1	4	-1	-1	-1	-1	4	4	-1	-1	-1	-1	-1	-1
respiratory-chain-complex-IV-assembly:4	4	4	4	-1	-1	-1	-1	-1	-1	-1	-1	-1	-1	-1	-1
respiratory-electron-transport-chain:4	4	4	-1	-1	-1	-1	-1	-1	-1	-1	-1	-1	-1	-1	-1
response-to-biotic-stimulus:4	-1	-1	4	-1	4	-1	-1	4	4	4	4	-1	-1	4	4
response-to-chemical-stimulus:4	4	-1	4	-1	4	-1	-1	4	4	4	4	-1	-1	4	4
response-to-endoplasmic-reticulum-stress:4	-1	-1	-1	-1	-1	-1	-1	4	-1	-1	-1	-1	-1	-1	-1
response-to-external-stimulus:4	4	-1	4	4	4	4	4	4	4	-1	4	-1	-1	4	4
response-to-extracellular-stimulus:4	4	-1	4	4	4	4	4	4	4	-1	4	-1	-1	4	4
response-to-nutrient:4	-1	-1	-1	-1	-1	4	-1	4	4	-1	4	-1	-1	-1	4
response-to-nutrient-levels:4	4	-1	4	4	4	4	4	4	4	-1	4	-1	-1	4	4
response-to-organic-substance:4	-1	-1	4	-1	4	4	-1	4	4	-1	4	-1	-1	4	4
response-to-osmotic-stress:4	-1	-1	-1	4	4	-1	-1	-1	-1	-1	-1	-1	-1	-1	-1
response-to-oxidative-stress:4	-1	4	-1	-1	-1	-1	-1	-1	-1	-1	-1	-1	-1	-1	-1
response-to-pheromone:4	-1	-1	-1	-1	-1	4	-1	-1	-1	-1	-1	-1	-1	-1	-1
response-to-pheromone-involved-in-conjugation-with-cellular-fusion:4	-1	-1	-1	-1	-1	4	-1	4	4	-1	4	-1	-1	-1	-1
response-to-protein-stimulus:4	-1	-1	4	-1	4	-1	-1	4	4	4	4	-1	4	4	4
response-to-salt-stress:4	-1	-1	-1	-1	-1	-1	-1	-1	-1	4	-1	-1	-1	-1	-1
response-to-starvation:4	-1	-1	4	4	4	4	4	4	4	-1	4	-1	-1	4	4
response-to-stimulus:4	-1	-1	-1	4	4	4	4	4	4	4	4	-1	-1	4	4
response-to-stress:4	-1	-1	-1	4	-1	-1	-1	4	4	-1	4	-1	-1	4	4
response-to-unfolded-protein:4	-1	-1	4	-1	4	-1	-1	4	4	-1	4	-1	-1	4	4
retrograde-transport,-endosome-to-Golgi:4	-1	-1	-1	-1	-1	4	-1	-1	-1	-1	-1	-1	-1	-1	-1
ribonucleoside-triphosphate-biosynthetic-process:4	-1	4	-1	-1	-1	-1	-1	-1	-1	-1	-1	-1	-1	-1	-1
ribonucleoside-triphosphate-metabolic-process:4	4	4	-1	-1	-1	-1	-1	-1	-1	-1	-1	-1	-1	-1	-1
secretion:4	-1	-1	-1	4	4	4	-1	4	4	-1	4	-1	-1	4	4
secretion-by-cell:4	-1	-1	-1	4	4	4	-1	4	4	-1	4	-1	-1	4	4
serine-family-amino-acid-metabolic-process:4	-1	4	-1	-1	-1	-1	-1	-1	-1	-1	-1	-1	-1	-1	-1
sexual-reproduction:4	4	-1	4	4	-1	4	-1	4	4	-1	4	-1	-1	-1	-1
sexual-sporulation:4	4	-1	4	-1	-1	-1	-1	4	4	-1	4	-1	-1	-1	-1
sexual-sporulation-resulting-in-formation-of-a-cellular-spore:4	4	-1	4	-1	-1	-1	-1	4	4	-1	4	-1	-1	-1	-1
signal-transduction:4	-1	-1	-1	4	4	4	4	4	4	-1	4	-1	-1	-1	-1
signaling:4	-1	-1	-1	4	4	4	4	4	4	-1	4	-1	-1	-1	-1
sister-chromatid-segregation:4	-1	-1	-1	4	-1	-1	-1	-1	-1	-1	-1	-1	-1	-1	-1
small-molecule-catabolic-process:4	-1	4	-1	-1	-1	-1	-1	-1	-1	-1	-1	-1	-1	-1	-1
spore-wall-assembly:4	-1	-1	4	-1	-1	-1	-1	4	4	4	-1	-1	-1	-1	-1
spore-wall-biogenesis:4	-1	-1	4	-1	-1	-1	-1	4	4	4	-1	-1	-1	-1	-1
sporulation:4	4	-1	4	4	-1	-1	4	4	4	4	4	-1	-1	-1	4
sporulation-resulting-in-formation-of-a-cellular-spore:4	4	-1	4	4	-1	-1	4	4	4	4	4	-1	-1	-1	4
sterol-transport:4	-1	-1	4	-1	-1	-1	-1	-1	-1	-1	-1	-1	-1	-1	-1
sulfate-assimilation:4	-1	4	-1	-1	-1	-1	-1	-1	-1	-1	-1	-1	-1	-1	-1
tRNA-aminoacylation-for-mitochondrial-protein-translation:4	-1	4	-1	-1	-1	-1	-1	-1	-1	-1	-1	-1	-1	-1	-1
translation:4	-1	4	-1	-1	-1	-1	-1	-1	-1	-1	-1	-1	-1	-1	-1
transport:4	-1	4	-1	-1	-1	-1	-1	-1	-1	4	-1	-1	-1	-1	-1
trehalose-metabolic-process:4	-1	-1	-1	-1	-1	-1	-1	-1	-1	4	-1	-1	-1	-1	-1
tricarboxylic-acid-cycle:4	-1	-1	4	-1	-1	-1	-1	-1	-1	-1	-1	-1	-1	-1	-1
ubiquitin-dependent-protein-catabolic-process:4	4	4	4	4	4	4	4	4	4	4	4	4	4	4	4
ubiquitin-dependent-protein-catabolic-process-via-the-multivesicular-body-sorting-pathway:4	-1	-1	4	-1	4	-1	-1	4	4	-1	4	-1	-1	-1	4
vacuolar-transport:4	4	4	4	4	4	4	-1	4	4	-1	4	-1	-1	-1	4
vacuole-fusion,-non-autophagic:4	-1	-1	-1	4	-1	4	-1	-1	-1	-1	-1	-1	-1	-1	-1
vacuole-inheritance:4	-1	-1	4	-1	-1	-1	-1	-1	-1	4	-1	-1	-1	-1	-1
vacuole-organization:4	4	-1	4	4	4	4	-1	4	4	4	4	-1	4	4	4
vesicle-docking:4	-1	-1	-1	4	-1	-1	-1	-1	-1	-1	-1	-1	-1	-1	-1
vesicle-docking-involved-in-exocytosis:4	-1	-1	-1	4	-1	-1	-1	-1	-1	-1	-1	-1	-1	-1	-1
vesicle-fusion:4	-1	-1	-1	4	-1	-1	-1	-1	-1	4	-1	-1	-1	-1	-1
vesicle-fusion-with-Golgi-apparatus:4	-1	-1	-1	-1	-1	-1	-1	-1	-1	4	-1	-1	-1	-1	-1
vesicle-mediated-transport:4	-1	4	4	4	4	4	-1	4	4	4	4	-1	-1	-1	4
vesicle-organization:4	-1	-1	-1	4	-1	4	-1	-1	-1	4	-1	-1	-1	-1	-1
:1	-2	-2	-2	-2	-2	-2	-2	-2	-2	-2	-2	-2	-2	-2	-2
'de-novo'-protein-folding:5	-1	-1	-1	-1	-1	-1	-1	5	5	-1	5	-1	-1	-1	-1
ATP-synthesis-coupled-electron-transport:5	-1	-1	-1	-1	-1	-1	-1	-1	-1	-1	-1	5	5	5	-1
ER-associated-protein-catabolic-process:5	-1	-1	-1	-1	-1	5	-1	-1	-1	5	-1	-1	-1	-1	-1
G-protein-coupled-receptor-protein-signaling-pathway:5	-1	-1	-1	-1	-1	-1	-1	-1	-1	5	-1	-1	-1	-1	-1
NADP-metabolic-process:5	5	-1	5	-1	5	-1	-1	5	-1	-1	-1	-1	-1	-1	-1
NADPH-regeneration:5	5	-1	5	-1	5	-1	-1	5	-1	-1	-1	-1	-1	-1	-1
acetyl-CoA-catabolic-process:5	5	5	5	-1	5	-1	-1	-1	-1	-1	-1	5	-1	5	-1
acetyl-CoA-metabolic-process:5	5	5	5	-1	5	-1	-1	-1	-1	-1	-1	5	-1	-1	-1
aerobic-respiration:5	5	5	5	-1	5	-1	-1	-1	-1	-1	5	5	5	5	5
alcohol-biosynthetic-process:5	-1	5	5	-1	5	-1	-1	5	-1	-1	-1	-1	-1	-1	-1
alcohol-catabolic-process:5	5	-1	5	-1	5	5	5	5	5	-1	5	-1	-1	-1	-1
alcohol-metabolic-process:5	5	5	5	-1	5	5	5	5	5	-1	5	-1	-1	-1	5
amine-biosynthetic-process:5	-1	5	5	-1	5	-1	-1	-1	-1	-1	-1	-1	-1	-1	-1
amine-catabolic-process:5	5	5	5	-1	5	5	5	5	5	-1	5	-1	-1	-1	5
amine-metabolic-process:5	5	5	5	-1	5	-1	-1	-1	-1	-1	-1	-1	-1	-1	-1
anatomical-structure-development:5	-1	-1	-1	-1	-1	5	5	-1	-1	-1	-1	-1	-1	-1	-1
anatomical-structure-formation-involved-in-morphogenesis:5	-1	-1	-1	-1	-1	5	5	-1	-1	-1	-1	-1	-1	-1	-1
anatomical-structure-morphogenesis:5	-1	-1	-1	-1	-1	5	5	-1	-1	-1	-1	-1	-1	-1	-1
anion-transport:5	-1	-1	5	-1	5	-1	-1	-1	-1	-1	-1	-1	-1	-1	-1
arginine-biosynthetic-process:5	-1	5	-1	-1	-1	-1	-1	-1	-1	-1	-1	-1	-1	-1	-1
arginine-metabolic-process:5	-1	5	5	-1	5	-1	5	-1	-1	-1	-1	-1	-1	-1	-1
ascospore-formation:5	-1	-1	-1	-1	-1	5	5	-1	-1	-1	-1	-1	-1	-1	-1
ascospore-wall-assembly:5	-1	-1	-1	-1	-1	5	5	-1	-1	-1	-1	-1	-1	-1	-1
ascospore-wall-biogenesis:5	-1	-1	-1	-1	-1	5	5	-1	-1	-1	-1	-1	-1	-1	-1
aspartate-family-amino-acid-biosynthetic-process:5	-1	5	-1	-1	-1	-1	-1	-1	-1	-1	-1	-1	-1	-1	-1
aspartate-family-amino-acid-metabolic-process:5	-1	5	-1	-1	-1	-1	-1	-1	-1	-1	-1	-1	-1	-1	-1
autophagic-vacuole-assembly:5	5	-1	-1	-1	-1	-1	-1	-1	-1	-1	-1	-1	-1	-1	-1
carbohydrate-biosynthetic-process:5	5	-1	5	-1	5	5	5	5	-1	-1	-1	-1	-1	-1	-1
carbohydrate-catabolic-process:5	5	5	5	5	5	5	5	5	5	5	5	5	5	-1	5
carbohydrate-metabolic-process:5	5	5	5	-1	5	5	5	5	5	-1	5	5	5	5	5
carbohydrate-transport:5	-1	-1	5	-1	5	-1	-1	-1	-1	-1	-1	-1	-1	-1	-1
carboxylic-acid-biosynthetic-process:5	-1	5	5	-1	5	-1	-1	-1	-1	-1	-1	-1	-1	-1	-1
carboxylic-acid-catabolic-process:5	5	5	5	5	5	5	5	5	5	-1	5	-1	-1	5	5
carboxylic-acid-metabolic-process:5	5	5	5	-1	5	5	-1	5	5	-1	-1	-1	-1	-1	-1
catabolic-process:5	5	5	5	5	5	5	5	5	5	5	5	-1	-1	-1	-1
cell-development:5	-1	-1	-1	-1	-1	5	5	-1	-1	-1	-1	-1	-1	-1	-1
cell-differentiation:5	-1	-1	-1	-1	-1	5	5	-1	-1	-1	-1	-1	-1	-1	-1
cell-redox-homeostasis:5	-1	-1	5	-1	5	-1	-1	-1	-1	5	-1	-1	-1	-1	-1
cell-surface-receptor-linked-signaling-pathway:5	-1	-1	-1	-1	-1	-1	-1	-1	-1	5	-1	-1	-1	-1	-1
cell-wall-assembly:5	-1	-1	-1	5	-1	5	5	-1	-1	-1	-1	-1	-1	-1	-1
cell-wall-biogenesis:5	-1	-1	-1	5	-1	5	-1	-1	-1	-1	-1	-1	-1	-1	-1
cellular-aldehyde-metabolic-process:5	5	5	5	-1	5	-1	-1	5	5	-1	5	-1	-1	-1	-1
cellular-amine-metabolic-process:5	5	5	5	-1	5	-1	-1	-1	-1	-1	-1	-1	-1	-1	-1
cellular-amino-acid-biosynthetic-process:5	-1	5	5	-1	5	-1	-1	-1	-1	-1	-1	-1	-1	-1	-1
cellular-amino-acid-catabolic-process:5	5	5	5	-1	5	5	5	5	5	-1	5	-1	-1	-1	5
cellular-amino-acid-metabolic-process:5	5	5	5	-1	5	-1	-1	-1	-1	-1	-1	-1	-1	-1	-1
cellular-carbohydrate-biosynthetic-process:5	5	5	5	-1	5	5	5	5	5	-1	5	-1	-1	-1	-1
cellular-carbohydrate-catabolic-process:5	5	-1	5	5	5	5	5	5	5	-1	5	5	5	-1	5
cellular-carbohydrate-metabolic-process:5	5	5	5	-1	5	5	5	5	5	-1	5	5	5	5	5
cellular-catabolic-process:5	5	-1	-1	-1	-1	-1	-1	-1	-1	5	-1	-1	-1	-1	-1
cellular-component-assembly-involved-in-morphogenesis:5	-1	-1	-1	-1	-1	5	5	-1	-1	-1	-1	-1	-1	-1	-1
cellular-component-morphogenesis:5	-1	-1	-1	-1	-1	-1	5	-1	-1	-1	-1	-1	-1	-1	-1
cellular-developmental-process:5	-1	-1	-1	-1	-1	5	5	-1	-1	-1	-1	-1	-1	-1	-1
cellular-glucan-metabolic-process:5	5	5	5	-1	5	5	5	-1	-1	-1	-1	-1	-1	-1	-1
cellular-ketone-metabolic-process:5	5	5	5	-1	5	-1	-1	5	5	-1	-1	-1	-1	-1	-1
cellular-lipid-catabolic-process:5	-1	-1	5	-1	5	5	5	5	5	-1	5	-1	-1	-1	-1
cellular-macromolecule-catabolic-process:5	-1	-1	-1	-1	-1	-1	-1	-1	-1	5	-1	-1	-1	-1	-1
cellular-nitrogen-compound-biosynthetic-process:5	-1	5	-1	-1	5	-1	-1	-1	-1	-1	-1	-1	-1	-1	-1
cellular-polysaccharide-biosynthetic-process:5	5	5	5	-1	5	5	5	-1	-1	-1	-1	-1	-1	-1	-1
cellular-polysaccharide-metabolic-process:5	5	-1	5	-1	5	5	5	-1	-1	-1	-1	-1	-1	-1	-1
cellular-process-involved-in-reproduction:5	-1	-1	-1	-1	-1	-1	5	-1	-1	5	-1	-1	-1	-1	-1
cellular-protein-catabolic-process:5	-1	-1	-1	-1	-1	-1	-1	-1	-1	5	-1	-1	-1	-1	-1
cellular-respiration:5	5	5	5	-1	5	-1	-1	-1	-1	-1	-1	5	5	5	5
cellular-response-to-chemical-stimulus:5	-1	-1	-1	-1	-1	-1		-1	-1	-1	5	-1	-1	-1	-1	-1
cellular-response-to-external-stimulus:5	-1	-1	-1	5	-1	-1	-1	-1	-1	-1	-1	-1	-1	-1	-1
cellular-response-to-extracellular-stimulus:5	-1	-1	-1	5	-1	-1	-1	-1	-1	-1	-1	-1	-1	-1	-1
cellular-response-to-nutrient-levels:5	-1	-1	-1	5	-1	-1	-1	-1	-1	-1	-1	-1	-1	-1	-1
cellular-response-to-oxidative-stress:5	-1	-1	5	-1	5	5	-1	5	-1	5	5	-1	-1	-1	5
cellular-response-to-starvation:5	5	-1	-1	-1	-1	-1	-1	-1	-1	-1	-1	-1	-1	-1	-1
cellular-response-to-stimulus:5	-1	-1	-1	-1	-1	-1	-1	-1	-1	5	-1	-1	-1	-1	-1
coenzyme-catabolic-process:5	5	5	5	-1	5	-1	-1	-1	-1	-1	-1	5	-1	5	-1
coenzyme-metabolic-process:5	5	-1	5	-1	5	-1	-1	-1	-1	-1	-1	-1	-1	-1	-1
cofactor-catabolic-process:5	5	5	5	-1	5	-1	-1	5	5	-1	5	5	-1	5	-1
cofactor-metabolic-process:5	5	-1	5	-1	5	-1	-1	-1	-1	-1	-1	-1	-1	-1	-1
conjugation:5	-1	-1	-1	-1	-1	-1	-1	-1	-1	5	-1	-1	-1	-1	-1
conjugation-with-cellular-fusion:5	-1	-1	-1	-1	-1	-1	-1	-1	-1	5	-1	-1	-1	-1	-1
cytogamy:5	-1	-1	-1	-1	-1	-1	-1	-1	-1	5	-1	-1	-1	-1	-1
deadenylation-dependent-decapping-of-nuclear-transcribed-mRNA:5	-1	-1	5	-1	5	-1	-1	-1	-1	-1	-1	-1	-1	-1	-1
developmental-process:5	-1	-1	-1	-1	-1	5	5	-1	-1	-1	-1	-1	-1	-1	-1
developmental-process-involved-in-reproduction:5	-1	-1	-1	-1	-1	-1	5	-1	-1	-1	-1	-1	-1	-1	-1
disaccharide-metabolic-process:5	5	-1	5	5	5	5	5	5	5	-1	5	5	5	5	5
electron-transport-chain:5	-1	-1	-1	-1	-1	-1	-1	-1	-1	-1	-1	5	5	5	-1
energy-derivation-by-oxidation-of-organic-compounds:5	5	5	5	-1	5	5	-1	5	5	-1	5	5	5	5	5
energy-reserve-metabolic-process:5	5	5	5	5	5	5	5	5	5	5	5	-1	-1	-1	5
fungal-type-cell-wall-assembly:5	-1	-1	-1	-1	-1	5	5	-1	-1	-1	-1	-1	-1	-1	-1
fungal-type-cell-wall-biogenesis:5	-1	-1	-1	-1	-1	5	5	-1	-1	-1	-1	-1	-1	-1	-1
fungal-type-cell-wall-organization-or-biogenesis:5	-1	-1	-1	-1	-1	5	-1	-1	-1	-1	-1	-1	-1	-1	-1
galactose-metabolic-process:5	5	-1	5	-1	-1	-1	-1	-1	-1	-1	-1	-1	-1	-1	-1
generation-of-precursor-metabolites-and-energy:5	5	5	5	-1	5	5	5	5	5	-1	5	5	5	5	5
glucan-biosynthetic-process:5	5	5	5	-1	5	5	5	-1	-1	-1	-1	-1	-1	-1	-1
glucan-metabolic-process:5	5	5	5	-1	5	5	5	-1	-1	-1	-1	-1	-1	-1	-1
gluconeogenesis:5	5	5	5	-1	5	-1	5	5	5	-1	5	-1	-1	-1	-1
glucose-catabolic-process:5	5	-1	5	-1	5	5	5	5	5	-1	5	-1	-1	-1	-1
glucose-metabolic-process:5	5	5	5	-1	5	-1	5	5	5	-1	5	-1	-1	-1	-1
glutamate-biosynthetic-process:5	5	5	5	-1	5	5	-1	5	5	-1	5	5	-1	5	5
glutamate-metabolic-process:5	5	5	5	-1	5	5	-1	5	5	-1	5	5	-1	5	5
glutamine-family-amino-acid-biosynthetic-process:5	5	5	5	-1	5	5	-1	5	5	-1	5	5	-1	5	5
glutamine-family-amino-acid-catabolic-process:5	5	5	5	5	5	5	5	5	5	-1	5	-1	-1	5	5
glutamine-family-amino-acid-metabolic-process:5	5	5	5	5	5	5	-1	5	5	-1	5	-1	-1	5	5
glutamine-metabolic-process:5	-1	-1	5	-1	5	-1	-1	-1	-1	-1	-1	-1	-1	-1	-1
glycerolipid-catabolic-process:5	-1	-1	-1	-1	-1	-1	5	-1	-1	-1	-1	-1	-1	-1	-1
glycine-metabolic-process:5	5	-1	5	-1	5	-1	-1	-1	-1	-1	-1	-1	-1	-1	-1
glycogen-biosynthetic-process:5	5	5	5	-1	5	5	5	-1	-1	-1	-1	-1	-1	-1	-1
glycogen-metabolic-process:5	5	5	5	-1	5	5	5	5	-1	5	-1	-1	-1	-1	-1
glycolysis:5	5	-1	5	-1	5	5	5	5	5	-1	5	-1	-1	-1	-1
glycoside-metabolic-process:5	5	-1	5	5	5	5	5	5	5	-1	5	5	5	5	5
heterocycle-biosynthetic-process:5	-1	5	-1	-1	-1	-1	-1	-1	-1	-1	-1	-1	-1	-1	-1
hexose-biosynthetic-process:5	-1	-1	5	-1	5	-1	5	5	5	-1	5	-1	-1	-1	-1
hexose-catabolic-process:5	5	-1	5	-1	5	5	5	5	5	-1	5	-1	-1	-1	-1
hexose-metabolic-process:5	5	5	5	-1	5	5	5	5	5	-1	5	-1	-1	-1	-1
histidine-biosynthetic-process:5	-1	5	-1	-1	-1	-1	-1	-1	-1	-1	-1	-1	-1	-1	-1
histidine-family-amino-acid-biosynthetic-process:5	-1	5	-1	-1	-1	-1	-1	-1	-1	-1	-1	-1	-1	-1	-1
histidine-family-amino-acid-metabolic-process:5	-1	5	-1	-1	-1	-1	-1	-1	-1	-1	-1	-1	-1	-1	-1
histidine-metabolic-process:5	-1	5	-1	-1	-1	-1	-1	-1	-1	-1	-1	-1	-1	-1	-1
inorganic-anion-transport:5	-1	-1	5	-1	5	-1	-1	5	5	-1	-1	-1	-1	-1	-1
leucine-metabolic-process:5	5	-1	5	-1	5	-1	-1	-1	-1	-1	-1	-1	-1	-1	-1
lipid-catabolic-process:5	-1	-1	-1	-1	-1	-1	5	5	5	-1	5	-1	-1	-1	-1
lysine-biosynthetic-process:5	-1	5	-1	-1	-1	-1	-1	-1	-1	-1	-1	-1	-1	-1	-1
lysine-biosynthetic-process-via-aminoadipic-acid:5	-1	5	-1	-1	-1	-1	-1	-1	-1	-1	-1	-1	-1	-1	-1
lysine-metabolic-process:5	-1	5	-1	-1	-1	-1	-1	-1	-1	-1	-1	-1	-1	-1	-1
macromolecule-catabolic-process:5	-1	-1	-1	-1	-1	-1	-1	-1	-1	5	-1	-1	-1	-1	-1
mannose-metabolic-process:5	-1	-1	5	-1	5	-1	-1	-1	-1	-1	-1	-1	-1	-1	-1
misfolded-or-incompletely-synthesized-protein-catabolic-process:5	-1	-1	-1	-1	-1	-1	-1	-1	-1	5	-1	-1	-1	-1	-1
mitochondrial-ATP-synthesis-coupled-electron-transport:5	-1	-1	-1	-1	-1	-1	-1	-1	-1	-1	-1	5	5	5	-1
mitochondrial-electron-transport,-ubiquinol-to-cytochrome-c:5	-1	-1	-1	-1	-1	-1	-1	-1	-1	-1	-1	5	-1	5	-1
mitochondrion-degradation:5	5	-1	5	5	-1	-1	5	-1	-1	-1	-1	-1	-1	-1	-1
modification-dependent-macromolecule-catabolic-process:5	-1	-1	-1	-1	-1	-1	-1	-1	-1	5	-1	-1	-1	-1	-1
modification-dependent-protein-catabolic-process:5	-1	-1	-1	-1	-1	-1	-1	-1	-1	5	-1	-1	-1	-1	-1
monocarboxylic-acid-catabolic-process:5	-1	-1	5	-1	5	-1	-1	5	5	-1	5	-1	-1	-1	-1
monocarboxylic-acid-metabolic-process:5	-1	-1	-1	-1	-1	-1	-1	5	5	-1	5	-1	-1	-1	-1
monosaccharide-biosynthetic-process:5	-1	-1	5	-1	5	-1	5	5	5	-1	5	-1	-1	-1	-1
monosaccharide-catabolic-process:5	5	-1	5	-1	5	5	5	5	5	-1	5	-1	-1	-1	-1
monosaccharide-metabolic-process:5	5	5	5	-1	5	5	5	5	5	-1	5	-1	-1	-1	5
multi-organism-process:5	-1	-1	-1	-1	-1	-1	-1	-1	-1	5	-1	-1	-1	-1	-1
negative-regulation-of-carbohydrate-metabolic-process:5	5	-1	-1	-1	-1	-1	-1	-1	-1	-1	-1	-1	-1	-1	-1
negative-regulation-of-catalytic-activity:5	-1	-1	-1	-1	-1	-1	-1	-1	-1	-1	-1	5	5	5	-1
negative-regulation-of-cell-communication:5	-1	-1	-1	-1	-1	-1	-1	-1	-1	-1	-1	5	-1	5	-1
negative-regulation-of-cellular-carbohydrate-metabolic-process:5	5	-1	-1	-1	-1	-1	-1	-1	-1	-1	-1	-1	-1	-1	-1
negative-regulation-of-gluconeogenesis:5	5	-1	-1	-1	-1	-1	-1	-1	-1	-1	-1	-1	-1	-1	-1
negative-regulation-of-hydrolase-activity:5	-1	-1	-1	-1	-1	-1	-1	-1	-1	-1	-1	5	5	5	-1
negative-regulation-of-molecular-function:5	-1	-1	-1	-1	-1	-1	-1	-1	-1	5	-1	5	5	5	-1
negative-regulation-of-response-to-stimulus:5	-1	-1	-1	-1	-1	-1	-1	-1	-1	-1	-1	5	-1	5	-1
nicotinamide-nucleotide-metabolic-process:5	5	-1	5	-1	5	-1	-1	5	-1	-1	-1	-1	-1	-1	-1
oligosaccharide-catabolic-process:5	5	-1	5	-1	5	5	-1	5	5	-1	5	-1	-1	-1	5
oligosaccharide-metabolic-process:5	5	-1	5	-1	5	5	5	5	5	-1	5	5	-1	5	5
organic-acid-biosynthetic-process:5	-1	5	5	-1	5	-1	-1	-1	-1	-1	-1	-1	-1	-1	-1
organic-acid-catabolic-process:5	5	5	5	5	5	5	5	5	5	-1	5	-1	-1	5	5
organic-acid-metabolic-process:5	5	5	5	-1	5	5	-1	5	5	-1	-1	-1	-1	-1	-1
organic-substance-transport:5	-1	-1	-1	-1	5	-1	-1	-1	-1	-1	-1	-1	-1	-1	-1
ornithine-metabolic-process:5	-1	-1	-1	-1	-1	-1	5	-1	-1	-1	-1	-1	-1	-1	-1
oxidation-reduction-process:5	5	5	5	-1	5	5	5	5	5	-1	5	5	5	5	5
oxidative-phosphorylation:5	-1	-1	-1	-1	-1	-1	-1	-1	-1	-1	-1	5	5	5	-1
oxidoreduction-coenzyme-metabolic-process:5	5	-1	5	-1	5	-1	-1	-1	-1	-1	-1	-1	-1	-1	-1
oxoacid-metabolic-process:5	5	5	5	-1	5	5	-1	5	5	-1	-1	-1	-1	-1	-1
pentose-phosphate-shunt:5	-1	-1	5	-1	-1	-1	-1	-1	-1	-1	-1	-1	-1	-1	-1
pheromone-dependent-signal-transduction-involved-in-conjugation-with-cellular-fusion:5	-1	-1	-1	-1	-1	-1	-1	-1	-1	5	-1	-1	-1	-1	-1
phosphate-metabolic-process:5	-1	-1	-1	-1	5	-1	-1	-1	-1	-1	-1	-1	-1	-1	-1
phosphate-transport:5	-1	-1	-1	-1	-1	-1	-1	5	5	-1	-1	-1	-1	-1	-1
phosphorus-metabolic-process:5	-1	-1	-1	-1	5	-1	-1	-1	-1	-1	-1	-1	-1	-1	-1
phosphorylation:5	-1	-1	-1	-1	5	-1	-1	-1	-1	-1	-1	-1	-1	-1	-1
polyol-metabolic-process:5	5	-1	-1	-1	-1	5	5	-1	-1	-1	-1	-1	-1	5	5
polysaccharide-biosynthetic-process:5	5	-1	5	-1	5	5	5	-1	-1	-1	-1	-1	-1	-1	-1
polysaccharide-metabolic-process:5	5	-1	5	-1	5	5	5	-1	-1	-1	-1	-1	-1	-1	-1
proline-biosynthetic-process:5	-1	-1	5	-1	5	-1	-1	-1	-1	-1	-1	-1	-1	-1	-1
proline-metabolic-process:5	-1	-1	5	-1	5	-1	-1	-1	-1	-1	-1	-1	-1	-1	-1
proteasomal-protein-catabolic-process:5	-1	-1	-1	-1	-1	-1	-1	-1	-1	5	-1	-1	-1	-1	-1
proteasomal-ubiquitin-dependent-protein-catabolic-process:5	-1	-1	-1	-1	-1	-1	-1	-1	-1	5	-1	-1	-1	-1	-1
proteasome-assembly:5	-1	-1	-1	-1	-1	-1	-1	-1	-1	5	-1	-1	-1	-1	-1
proteasome-regulatory-particle-assembly:5	-1	-1	-1	-1	-1	-1	-1	-1	-1	5	-1	-1	-1	-1	-1
protein-catabolic-process:5	-1	-1	-1	-1	-1	-1	-1	-1	-1	5	-1	-1	-1	-1	-1
protein-deubiquitination:5	-1	-1	-1	-1	-1	-1	-1	-1	-1	5	-1	-1	-1	-1	-1
protein-folding:5	5	5	5	-1	5	5	5	5	5	5	5	5	5	5	5
protein-import-into-mitochondrial-inner-membrane:5	-1	-1	-1	-1	-1	-1	-1	-1	-1	-1	-1	-1	5	-1	-1
protein-import-into-peroxisome-matrix:5	-1	-1	-1	-1	-1	5	-1	-1	-1	-1	-1	-1	-1	-1	-1
protein-modification-by-small-protein-removal:5	-1	-1	-1	-1	-1	-1	-1	-1	-1	5	-1	-1	-1	-1	-1
protein-refolding:5	5	5	5	5	5	5	5	5	5	5	5	5	5	5	5
protein-stabilization:5	-1	-1	-1	-1	-1	-1	-1	5	5	-1	5	-1	-1	-1	-1
proteolysis:5	-1	-1	-1	-1	-1	-1	-1	-1	-1	5	-1	-1	-1	-1	-1
proteolysis-involved-in-cellular-protein-catabolic-process:5	-1	-1	-1	-1	-1	-1	-1	-1	-1	5	-1	-1	-1	-1	-1
purine-nucleoside-monophosphate-biosynthetic-process:5	-1	-1	5	-1	5	-1	-1	-1	-1	-1	-1	-1	-1	-1	-1
purine-nucleoside-monophosphate-metabolic-process:5	-1	-1	-1	-1	5	-1	-1	-1	-1	-1	-1	-1	-1	-1	-1
purine-ribonucleoside-monophosphate-biosynthetic-process:5	-1	-1	5	-1	5	-1	-1	-1	-1	-1	-1	-1	-1	-1	-1
purine-ribonucleoside-monophosphate-metabolic-process:5	-1	-1	5	-1	5	-1	-1	-1	-1	-1	-1	-1	-1	-1	-1
pyridine-containing-compound-metabolic-process:5	5	-1	5	-1	5	-1	-1	5	-1	-1	-1	-1	-1	-1	-1
pyridine-nucleotide-metabolic-process:5	5	-1	5	-1	5	-1	-1	5	-1	-1	-1	-1	-1	-1	-1
reactive-oxygen-species-metabolic-process:5	-1	-1	-1	-1	-1	-1	-1	-1	-1	5	-1	-1	-1	-1	-1
regulation-of-ATPase-activity:5	5	-1	-1	-1	-1	-1	-1	5	5	5	5	5	5	5	5
regulation-of-carbohydrate-biosynthetic-process:5	5	-1	-1	-1	-1	-1	-1	-1	-1	-1	-1	-1	-1	-1	-1
regulation-of-carbohydrate-metabolic-process:5	5	-1	-1	-1	-1	-1	-1	-1	-1	-1	-1	-1	-1	-1	-1
regulation-of-catabolic-process:5	-1	-1	-1	-1	-1	-1	-1	-1	-1	5	-1	-1	-1	-1	-1
regulation-of-cellular-carbohydrate-metabolic-process:5	5	-1	-1	-1	-1	-1	-1	-1	-1	-1	-1	-1	-1	-1	-1
regulation-of-cellular-ketone-metabolic-process:5	5	-1	5	-1	5	-1	-1	-1	-1	-1	-1	-1	-1	-1	-1
regulation-of-conjugation:5	-1	-1	-1	-1	-1	-1	-1	-1	-1	5	-1	-1	-1	-1	-1
regulation-of-conjugation-with-cellular-fusion:5	-1	-1	-1	-1	-1	-1	-1	-1	-1	5	-1	-1	-1	-1	-1
regulation-of-conjugation-with-cellular-fusion-by-signal-transduction:5	-1	-1	-1	-1	-1	-1	-1	-1	-1	5	-1	-1	-1	-1	-1
regulation-of-gluconeogenesis:5	5	-1	-1	-1	-1	-1	-1	-1	-1	-1	-1	-1	-1	-1	-1
regulation-of-glucose-metabolic-process:5	5	-1	-1	-1	-1	-1	-1	-1	-1	-1	-1	-1	-1	-1	-1
regulation-of-lipid-biosynthetic-process:5	-1	-1	-1	-1	-1	-1	-1	-1	-1	5	-1	-1	-1	-1	-1
regulation-of-molecular-function:5	-1	-1	-1	-1	-1	-1	-1	-1	-1	5	-1	-1	-1	-1	-1
regulation-of-multi-organism-process:5	-1	-1	-1	-1	-1	-1	-1	-1	-1	5	-1	-1	-1	-1	-1
regulation-of-protein-stability:5	-1	-1	-1	-1	-1	-1	-1	5	5	-1	5	-1	-1	-1	5
regulation-of-sequence-specific-DNA-binding-transcription-factor-activity:5	-1	-1	-1	-1	-1	-1	-1	-1	-1	5	-1	-1	-1	-1	-1
regulation-of-translation-in-response-to-stress:5	-1	-1	5	-1	5	-1	-1	-1	-1	-1	-1	-1	-1	-1	-1
reproduction:5	-1	-1	-1	-1	-1	-1	5	-1	-1	5	-1	-1	-1	-1	-1
reproduction-of-a-single-celled-organism:5	-1	-1	-1	-1	-1	-1	5	-1	-1	-1	-1	-1	-1	-1	-1
reproductive-process:5	-1	-1	-1	-1	-1	-1	5	-1	-1	5	-1	-1	-1	-1	-1
reproductive-process-in-single-celled-organism:5	-1	-1	-1	-1	-1	-1	5	-1	-1	-1	-1	-1	-1	-1	-1
respiratory-electron-transport-chain:5	-1	-1	-1	-1	-1	-1	-1	-1	-1	-1	-1	5	5	5	-1
response-to-chemical-stimulus:5	-1	-1	-1	-1	-1	-1	5	-1	-1	5	-1	-1	-1	-1	-1
response-to-heat:5	-1	-1	-1	-1	-1	5	-1	5	5	5	5	-1	-1	-1	-1
response-to-organic-substance:5	-1	-1	-1	-1	-1	-1	-1	-1	-1	5	-1	-1	-1	-1	-1
response-to-oxidative-stress:5	-1	-1	5	-1	5	5	-1	5	5	5	5	-1	5	-1	5
response-to-pheromone:5	-1	-1	-1	-1	-1	-1	-1	-1	-1	5	-1	-1	-1	-1	-1
response-to-pheromone-involved-in-conjugation-with-cellular-fusion:5	-1	-1	-1	-1	-1	-1	-1	-1	-1	5	-1	-1	-1	-1	-1
response-to-starvation:5	5	-1	-1	-1	-1	-1	-1	-1	-1	-1	-1	-1	-1	-1	-1
response-to-stimulus:5	-1	-1	-1	-1	-1	-1	5	-1	-1	5	-1	-1	-1	-1	-1
response-to-stress:5	-1	-1	-1	-1	-1	-1	5	-1	-1	-1	-1	-1	-1	-1	-1
response-to-temperature-stimulus:5	-1	-1	-1	-1	-1	5	5	5	5	5	5	-1	-1	-1	5
serine-family-amino-acid-metabolic-process:5	-1	-1	-1	-1	5	-1	-1	-1	-1	-1	-1	-1	-1	-1	-1
sexual-reproduction:5	-1	-1	-1	-1	-1	-1	5	-1	-1	5	-1	-1	-1	-1	-1
sexual-sporulation:5	-1	-1	-1	-1	-1	5	5	-1	-1	-1	-1	-1	-1	-1	-1
sexual-sporulation-resulting-in-formation-of-a-cellular-spore:5	-1	-1	-1	-1	-1	5	5	-1	-1	-1	-1	-1	-1	-1	-1
small-molecule-biosynthetic-process:5	-1	5	5	-1	5	-1	-1	-1	-1	-1	-1	-1	-1	-1	-1
small-molecule-catabolic-process:5	5	5	5	-1	5	5	5	5	5	-1	5	-1	-1	-1	5
small-molecule-metabolic-process:5	5	5	5	-1	5	-1	-1	-1	-1	-1	-1	-1	-1	-1	-1
spore-wall-assembly:5	-1	-1	-1	-1	-1	5	5	-1	-1	-1	-1	-1	-1	-1	-1
spore-wall-biogenesis:5	-1	-1	-1	-1	-1	5	5	-1	-1	-1	-1	-1	-1	-1	-1
sporulation:5	-1	-1	-1	-1	-1	5	5	-1	-1	-1	-1	-1	-1	-1	-1
sporulation-resulting-in-formation-of-a-cellular-spore:5	-1	-1	-1	-1	-1	5	5	-1	-1	-1	-1	-1	-1	-1	-1
superoxide-metabolic-process:5	-1	-1	-1	-1	-1	-1	-1	-1	-1	5	-1	-1	-1	-1	-1
synapsis:5	-1	-1	-1	5	-1	5	5	5	5	-1	5	-1	-1	-1	5
synaptonemal-complex-assembly:5	-1	-1	-1	5	-1	-1	-1	-1	-1	-1	5	-1	-1	-1	-1
synaptonemal-complex-organization:5	-1	-1	-1	5	-1	-1	-1	-1	-1	-1	-1	-1	-1	-1	-1
trehalose-metabolic-process:5	5	-1	5	5	5	5	5	5	5	-1	5	5	5	5	5
tricarboxylic-acid-cycle:5	5	5	5	-1	5	-1	-1	-1	-1	-1	-1	5	-1	5	-1
ubiquitin-dependent-protein-catabolic-process:5	-1	-1	-1	-1	-1	-1	-1	-1	-1	5	-1	-1	-1	-1	-1

## Sheet: Supp Table 3
Supplmentary Table 3
GO process enrichment for merged stress	Scer	Cgla	Anc4	Scas	Anc5	Kwal	Klac	Anc8	Anc9	Calb	Anc11	Sjap	Spom	Anc13	Anc14
5-phosphoribose-1-diphosphate-biosynthetic-process:1	-1	-1	1	-1	1	-1	1	-1	1
5-phosphoribose-1-diphosphate-metabolic-process:1	-1	-1	1	-1	1	-1	1	-1	1
CUT-catabolic-process:1	1	1	1	-1	1	-1	1	-1	1
CUT-metabolic-process:1	1	1	1	-1	1	-1	1	-1	1
D-ribose-biosynthetic-process:1	-1	-1	1	-1	1	-1	1	-1	1
D-ribose-metabolic-process:1	-1	-1	1	-1	1	-1	1	-1	1
DNA-dependent-DNA-replication-initiation:1	-1	-1	-1	-1	-1	-1	-1	1	-1
GMP-biosynthetic-process:1	1	-1	1	-1	1	-1	1	1	1
GMP-metabolic-process:1	1	-1	1	-1	1	-1	1	1	1
RNA-3'-end-processing:1	1	1	1	-1	1	1	1	-1	1
RNA-5'-end-processing:1	1	1	1	1	1	1	1	1	1
RNA-catabolic-process:1	-1	1	-1	-1	-1	-1	-1	-1	-1
RNA-metabolic-process:1	1	1	1	1	1	1	1	1	1
RNA-methylation:1	1	1	1	1	1	1	1	1	1
RNA-modification:1	1	1	1	1	1	1	1	1	1
RNA-processing:1	1	1	1	1	1	1	1	1	1
RNA-surveillance:1	1	1	1	-1	1	1	1	-1	1
S-phase:1	-1	-1	-1	-1	-1	-1	-1	1	-1
S-phase-of-mitotic-cell-cycle:1	-1	-1	-1	-1	-1	-1	-1	1	-1
U4-snRNA-3'-end-processing:1	1	1	1	1	1	1	1	-1	1
U5-snRNA-3'-end-processing:1	1	1	1	1	1	1	1	1	1
acetate-metabolic-process:1	-1	-1	-1	-1	-1	-1	1	-1	-1
amine-transport:1	-1	-1	-1	-1	-1	-1	-1	1	-1
aspartate-family-amino-acid-catabolic-process:1	-1	-1	-1	-1	-1	-1	1	-1	-1
box-C/D-snoRNA-metabolic-process:1	1	1	1	-1	-1	1	1	-1	1
box-C/D-snoRNA-processing:1	1	1	1	-1	-1	1	1	-1	1
carbohydrate-transport:1	-1	-1	-1	1	-1	-1	-1	-1	-1
cellular-component-assembly:1	-1	-1	-1	-1	-1	1	-1	-1	-1
cellular-component-assembly-at-cellular-level:1	-1	-1	-1	-1	-1	1	-1	-1	-1
cellular-component-biogenesis:1	1	1	1	1	1	1	1	1	1
cellular-component-biogenesis-at-cellular-level:1	1	1	1	1	1	1	1	1	1
cellular-component-organization-or-biogenesis:1	1	1	1	1	1	1	1	1	1
cellular-component-organization-or-biogenesis-at-cellular-level:1	1	1	1	1	1	1	1	1	1
cellular-macromolecular-complex-assembly:1	1	1	1	-1	1	1	1	1	1
cellular-macromolecular-complex-subunit-organization:1	-1	-1	1	-1	1	1	-1	1	-1
cellular-macromolecule-metabolic-process:1	1	1	1	1	1	1	1	1	1
cellular-metabolic-compound-salvage:1	-1	-1	1	-1	1	-1	-1	-1	-1
cellular-metabolic-process:1	1	1	1	-1	1	1	1	-1	1
cellular-nitrogen-compound-metabolic-process:1	1	1	1	1	1	1	1	1	1
cellular-process:1	1	1	1	-1	1	1	1	-1	1
cleavage-involved-in-rRNA-processing:1	1	1	1	1	1	1	1	1	1
endonucleolytic-cleavage-in-5'-ETS-of-tricistronic-rRNA-transcript-(SSU-rRNA,-5.8S-rRNA,-LSU-rRNA):1	1	1	1	1	1	1	1	1	1
endonucleolytic-cleavage-in-ITS1-to-separate-SSU-rRNA-from-5.8S-rRNA-and-LSU-rRNA-from-tricistronic-rRNA-transcript-(SSU-rRNA,-5.8S-rRNA,-LSU-rRNA):1	1	1	1	1	1	1	1	1	1
endonucleolytic-cleavage-involved-in-rRNA-processing:1	1	1	1	1	1	1	1	1	1
endonucleolytic-cleavage-of-tricistronic-rRNA-transcript-(SSU-rRNA,-5.8S-rRNA,-LSU-rRNA):1	1	1	1	1	1	1	1	1	1
endonucleolytic-cleavage-to-generate-mature-5'-end-of-SSU-rRNA-from-(SSU-rRNA,-5.8S-rRNA,-LSU-rRNA):1	1	1	1	1	1	1	1	1	1
establishment-of-organelle-localization:1	1	1	1	1	1	1	1	1	1
establishment-of-ribosome-localization:1	1	1	1	1	1	1	1	1	1
exonucleolytic-nuclear-transcribed-mRNA-catabolic-process-involved-in-deadenylation-dependent-decay:1	-1	1	-1	-1	-1	1	-1	-1	-1
exonucleolytic-trimming-involved-in-rRNA-processing:1	1	1	1	1	1	1	1	-1	1
exonucleolytic-trimming-to-generate-mature-3'-end-of-5.8S-rRNA-from-tricistronic-rRNA-transcript-(SSU-rRNA,-5.8S-rRNA,-LSU-rRNA):1	1	1	1	1	1	1	1	-1	1
gene-expression:1	1	1	1	1	1	1	1	1	1
guanosine-metabolic-process:1	-1	1	-1	-1	-1	-1	-1	-1	-1
hexose-transport:1	-1	-1	-1	1	-1	-1	-1	-1	-1
intracellular-mRNA-localization:1	-1	-1	1	-1	1	1	1	-1	1
intronic-box-C/D-snoRNA-processing:1	-1	1	-1	-1	-1	-1	-1	-1	-1
intronic-snoRNA-processing:1	-1	1	-1	-1	-1	-1	-1	-1	-1
mRNA-catabolic-process:1	-1	1	1	-1	-1	-1	-1	-1	-1
mRNA-metabolic-process:1	-1	1	-1	-1	-1	-1	-1	-1	-1
macromolecular-complex-assembly:1	1	1	1	-1	1	1	1	1	1
macromolecular-complex-subunit-organization:1	-1	-1	-1	-1	-1	1	-1	-1	-1
macromolecule-metabolic-process:1	1	1	1	1	1	1	1	1	1
macromolecule-methylation:1	1	1	1	1	1	1	1	1	1
macromolecule-modification:1	-1	1	-1	-1	-1	-1	-1	-1	-1
maturation-of-5.8S-rRNA:1	1	1	1	1	1	1	1	1	1
maturation-of-5.8S-rRNA-from-tricistronic-rRNA-transcript-(SSU-rRNA,-5.8S-rRNA,-LSU-rRNA):1	1	1	1	1	1	1	1	1	1
maturation-of-LSU-rRNA:1	1	1	1	1	1	1	1	1	1
maturation-of-LSU-rRNA-from-tricistronic-rRNA-transcript-(SSU-rRNA,-5.8S-rRNA,-LSU-rRNA):1	1	1	1	1	1	1	1	1	1
maturation-of-SSU-rRNA:1	1	1	1	1	1	1	1	1	1
maturation-of-SSU-rRNA-from-tricistronic-rRNA-transcript-(SSU-rRNA,-5.8S-rRNA,-LSU-rRNA):1	1	1	1	1	1	1	1	1	1
metabolic-process:1	1	1	1	-1	1	1	1	-1	1
methylation:1	1	1	1	1	1	1	1	1	1
monosaccharide-transport:1	-1	-1	-1	1	-1	-1	-1	-1	-1
ncRNA-3'-end-processing:1	1	1	1	1	1	1	1	-1	1
ncRNA-5'-end-processing:1	1	1	1	1	1	1	1	1	1
ncRNA-catabolic-process:1	1	1	1	-1	1	1	1	-1	1
ncRNA-metabolic-process:1	1	1	1	1	1	1	1	1	1
ncRNA-polyadenylation:1	-1	1	1	-1	1	-1	1	-1	1
ncRNA-processing:1	1	1	1	1	1	1	1	1	1
nitrogen-compound-metabolic-process:1	1	1	1	1	1	1	1	1	1
nitrogen-compound-transport:1	-1	-1	-1	-1	-1	-1	-1	1	-1
nonfunctional-rRNA-decay:1	-1	1	-1	-1	-1	-1	-1	-1	-1
nuclear-RNA-surveillance:1	1	1	1	-1	1	1	1	-1	1
nuclear-export:1	1	1	1	1	1	1	1	1	1
nuclear-mRNA-surveillance:1	1	1	1	1	1	1	1	-1	1
nuclear-mRNA-surveillance-of-mRNA-3'-end-processing:1	1	1	1	-1	1	1	1	-1	1
nuclear-ncRNA-surveillance:1	1	1	1	-1	1	1	1	-1	1
nuclear-polyadenylation-dependent-CUT-catabolic-process:1	1	1	1	-1	1	-1	1	-1	1
nuclear-polyadenylation-dependent-mRNA-catabolic-process:1	1	1	1	-1	1	1	1	-1	1
nuclear-polyadenylation-dependent-ncRNA-catabolic-process:1	1	1	1	-1	1	1	1	-1	1
nuclear-polyadenylation-dependent-rRNA-catabolic-process:1	1	1	1	-1	1	1	1	-1	1
nuclear-polyadenylation-dependent-snRNA-catabolic-process:1	1	1	1	-1	1	-1	1	-1	1
nuclear-polyadenylation-dependent-snoRNA-catabolic-process:1	1	1	1	-1	1	-1	1	-1	1
nuclear-polyadenylation-dependent-tRNA-catabolic-process:1	1	1	1	-1	1	1	1	-1	1
nuclear-retention-of-pre-mRNA-at-the-site-of-transcription:1	1	1	1	1	1	1	1	1	1
nuclear-transcribed-mRNA-catabolic-process:1	-1	1	1	-1	-1	-1	-1	-1	-1
nuclear-transcribed-mRNA-catabolic-process,-3'-5'-exonucleolytic-nonsense-mediated-decay:1	-1	1	-1	-1	-1	1	-1	-1	-1
nuclear-transcribed-mRNA-catabolic-process,-deadenylation-dependent-decay:1	-1	1	-1	-1	-1	-1	-1	-1	-1
nuclear-transcribed-mRNA-catabolic-process,-exonucleolytic:1	-1	1	-1	-1	-1	1	-1	-1	-1
nuclear-transcribed-mRNA-catabolic-process,-exonucleolytic,-3'-5':1	-1	1	-1	-1	-1	1	-1	-1	-1
nuclear-transcribed-mRNA-catabolic-process,-non-stop-decay:1	-1	1	-1	-1	-1	-1	-1	-1	-1
nuclear-transcribed-mRNA-catabolic-process,-nonsense-mediated-decay:1	-1	1	-1	-1	-1	-1	-1	-1	-1
nuclear-transport:1	1	1	1	1	1	1	1	1	1
nucleic-acid-metabolic-process:1	1	1	1	1	1	1	1	1	1
nucleic-acid-phosphodiester-bond-hydrolysis:1	1	1	1	1	1	1	1	1	1
nucleobase,-nucleoside,-nucleotide-and-nucleic-acid-biosynthetic-process:1	-1	-1	1	-1	1	-1	1	-1	1
nucleobase,-nucleoside,-nucleotide-and-nucleic-acid-metabolic-process:1	1	1	1	1	1	1	1	1	1
nucleobase,-nucleoside-and-nucleotide-biosynthetic-process:1	-1	-1	1	-1	1	-1	1	-1	1
nucleobase-biosynthetic-process:1	1	-1	1	-1	1	-1	-1	-1	-1
nucleobase-transport:1	-1	-1	-1	1	-1	-1	-1	-1	-1
nucleocytoplasmic-transport:1	1	1	1	1	1	1	1	1	1
nucleoside-biosynthetic-process:1	1	-1	1	-1	1	-1	-1	-1	-1
nucleoside-metabolic-process:1	-1	1	1	-1	1	-1	1	-1	1
nucleoside-monophosphate-biosynthetic-process:1	1	1	1	-1	1	-1	1	-1	1
nucleoside-monophosphate-metabolic-process:1	1	1	1	-1	1	-1	1	-1	1
nucleoside-salvage:1	-1	-1	1	-1	1	-1	-1	-1	-1
nucleosome-assembly:1	-1	-1	-1	-1	-1	-1	-1	1	-1
nucleotide-biosynthetic-process:1	-1	-1	1	-1	1	-1	1	-1	1
one-carbon-metabolic-process:1	1	1	1	1	1	1	1	1	1
organelle-assembly:1	1	1	1	1	1	1	1	1	1
organelle-localization:1	1	1	1	1	1	1	1	-1	1
organic-substance-transport:1	-1	-1	-1	1	-1	-1	-1	-1	-1
pentose-biosynthetic-process:1	-1	-1	1	-1	1	-1	1	-1	1
pentose-metabolic-process:1	-1	-1	1	-1	1	-1	1	-1	-1
peptidyl-amino-acid-modification:1	1	1	-1	-1	-1	-1	-1	-1	-1
peptidyl-histidine-modification:1	1	1	1	-1	-1	-1	-1	-1	-1
peptidyl-lysine-methylation:1	1	-1	-1	-1	-1	-1	-1	-1	-1
polyadenylation-dependent-RNA-catabolic-process:1	1	1	1	-1	1	1	1	-1	1
polyadenylation-dependent-mRNA-catabolic-process:1	1	1	1	-1	1	1	1	-1	1
polyadenylation-dependent-ncRNA-catabolic-process:1	1	1	1	-1	1	1	1	-1	1
polyadenylation-dependent-snoRNA-3'-end-processing:1	1	1	1	-1	1	1	1	-1	1
polyamine-transport:1	-1	-1	-1	-1	-1	-1	-1	1	-1
positive-regulation-of-spindle-pole-body-separation:1	-1	-1	1	-1	1	-1	-1	-1	-1
positive-regulation-of-transcription-from-RNA-polymerase-I-promoter:1	1	1	1	1	1	1	1	1	1
posttranscriptional-tethering-of-RNA-polymerase-II-gene-DNA-at-nuclear-periphery:1	-1	-1	1	-1	-1	-1	-1	-1	-1
primary-metabolic-process:1	1	1	1	1	1	1	1	1	1
protein-urmylation:1	-1	1	-1	-1	-1	-1	1	-1	-1
pseudouridine-synthesis:1	1	1	1	1	1	1	1	1	1
purine-containing-compound-biosynthetic-process:1	-1	-1	1	-1	1	-1	-1	-1	-1
purine-containing-compound-salvage:1	-1	1	1	-1	1	-1	1	-1	-1
purine-nucleoside-biosynthetic-process:1	-1	-1	1	-1	1	-1	1	-1	-1
purine-nucleoside-metabolic-process:1	-1	1	1	-1	-1	-1	-1	-1	-1
purine-nucleoside-monophosphate-biosynthetic-process:1	1	1	1	-1	1	-1	1	-1	1
purine-nucleoside-monophosphate-metabolic-process:1	-1	-1	1	-1	1	-1	1	-1	1
purine-ribonucleoside-biosynthetic-process:1	-1	-1	1	-1	1	-1	1	-1	-1
purine-ribonucleoside-metabolic-process:1	-1	1	1	-1	-1	-1	-1	-1	-1
purine-ribonucleoside-monophosphate-biosynthetic-process:1	1	1	1	-1	1	-1	1	-1	1
purine-ribonucleoside-monophosphate-metabolic-process:1	1	1	1	-1	1	-1	1	-1	1
purine-ribonucleoside-salvage:1	-1	-1	1	-1	1	-1	-1	-1	-1
pyrimidine-base-biosynthetic-process:1	1	-1	-1	-1	-1	-1	-1	-1	-1
pyrimidine-containing-compound-biosynthetic-process:1	1	-1	1	-1	-1	-1	-1	-1	-1
pyrimidine-containing-compound-metabolic-process:1	1	-1	-1	-1	-1	-1	-1	-1	-1
pyrimidine-nucleoside-metabolic-process:1	1	-1	1	-1	-1	-1	-1	-1	-1
pyrimidine-nucleoside-monophosphate-biosynthetic-process:1	1	-1	-1	-1	-1	-1	-1	-1	-1
pyrimidine-nucleoside-monophosphate-metabolic-process:1	1	-1	-1	-1	-1	-1	-1	-1	-1
pyrimidine-nucleotide-biosynthetic-process:1	1	-1	1	-1	-1	-1	-1	-1	-1
pyrimidine-nucleotide-metabolic-process:1	1	-1	1	-1	-1	-1	-1	-1	-1
pyrimidine-ribonucleoside-metabolic-process:1	1	-1	1	-1	-1	-1	-1	-1	-1
pyrimidine-ribonucleotide-biosynthetic-process:1	1	1	1	-1	1	-1	-1	-1	-1
pyrimidine-ribonucleotide-metabolic-process:1	1	1	1	-1	1	-1	-1	-1	-1
rRNA-3'-end-processing:1	1	1	1	1	1	1	1	-1	1
rRNA-5'-end-processing:1	1	1	1	1	1	1	1	1	1
rRNA-catabolic-process:1	1	1	1	-1	1	1	1	-1	1
rRNA-containing-ribonucleoprotein-complex-export-from-nucleus:1	1	1	1	1	1	1	1	1	1
rRNA-metabolic-process:1	1	1	1	1	1	1	1	1	1
rRNA-methylation:1	1	1	1	1	1	1	1	1	1
rRNA-modification:1	1	1	1	1	1	1	1	1	1
rRNA-processing:1	1	1	1	1	1	1	1	1	1
rRNA-transcription:1	1	1	1	1	1	1	1	1	1
regulation-of-transcription-from-RNA-polymerase-I-promoter:1	1	1	1	1	1	1	1	1	1
ribonucleoprotein-complex-assembly:1	1	1	1	1	1	1	1	1	1
ribonucleoprotein-complex-biogenesis:1	1	1	1	1	1	1	1	1	1
ribonucleoprotein-complex-export-from-nucleus:1	1	1	1	1	1	1	1	1	1
ribonucleoprotein-complex-localization:1	1	1	1	1	1	1	1	1	1
ribonucleoprotein-complex-subunit-organization:1	1	1	1	1	1	1	1	1	1
ribonucleoside-biosynthetic-process:1	1	-1	1	-1	1	-1	-1	-1	-1
ribonucleoside-metabolic-process:1	1	1	1	-1	1	-1	-1	-1	-1
ribonucleoside-monophosphate-biosynthetic-process:1	1	1	1	-1	1	-1	1	-1	1
ribonucleoside-monophosphate-metabolic-process:1	1	1	1	-1	1	-1	1	-1	1
ribonucleotide-biosynthetic-process:1	-1	-1	1	-1	1	-1	1	-1	1
ribonucleotide-metabolic-process:1	-1	-1	1	-1	1	-1	1	-1	1
ribose-phosphate-biosynthetic-process:1	-1	-1	1	-1	1	-1	1	-1	1
ribose-phosphate-metabolic-process:1	-1	-1	1	-1	1	-1	1	-1	1
ribosomal-large-subunit-assembly:1	1	1	1	1	1	1	1	1	1
ribosomal-large-subunit-biogenesis:1	1	1	1	1	1	1	1	1	1
ribosomal-large-subunit-export-from-nucleus:1	1	1	1	1	1	1	1	1	1
ribosomal-small-subunit-biogenesis:1	1	1	1	1	1	1	1	1	1
ribosomal-small-subunit-export-from-nucleus:1	1	-1	-1	1	-1	-1	-1	-1	-1
ribosomal-subunit-export-from-nucleus:1	1	1	1	1	1	1	1	1	1
ribosome-assembly:1	1	1	1	1	1	1	1	1	1
ribosome-biogenesis:1	1	1	1	1	1	1	1	1	1
ribosome-localization:1	1	1	1	1	1	1	1	1	1
snRNA-3'-end-processing:1	1	1	1	1	1	1	1	-1	1
snRNA-catabolic-process:1	1	1	1	-1	1	-1	1	-1	1
snRNA-metabolic-process:1	1	1	1	1	1	1	1	1	1
snRNA-modification:1	1	1	1	1	1	1	1	1	1
snRNA-processing:1	1	1	1	1	1	1	1	-1	1
snRNA-pseudouridine-synthesis:1	1	1	1	1	1	1	1	1	1
snoRNA-3'-end-processing:1	1	1	1	1	1	1	1	1	1
snoRNA-catabolic-process:1	1	1	1	-1	1	-1	1	-1	1
snoRNA-metabolic-process:1	1	1	1	-1	1	1	1	-1	1
snoRNA-processing:1	1	1	1	-1	1	1	1	1	1
tRNA-catabolic-process:1	1	1	1	-1	1	1	1	-1	1
tRNA-metabolic-process:1	1	1	1	1	1	1	1	1	1
tRNA-methylation:1	1	1	1	1	1	1	1	1	1
tRNA-modification:1	1	1	1	1	1	1	1	1	1
tRNA-processing:1	1	1	1	1	1	1	1	1	1
tRNA-pseudouridine-synthesis:1	-1	1	1	-1	1	1	1	1	1
tRNA-transcription:1	1	1	1	1	1	1	1	-1	1
tRNA-transcription-from-RNA-polymerase-III-promoter:1	1	1	1	1	1	1	1	-1	1
tRNA-wobble-base-modification:1	1	1	-1	-1	-1	-1	1	-1	-1
tRNA-wobble-position-uridine-thiolation:1	-1	1	-1	-1	-1	-1	-1	-1	-1
tRNA-wobble-uridine-modification:1	1	1	-1	-1	-1	-1	1	-1	-1
transcription-from-RNA-polymerase-I-promoter:1	1	1	1	1	1	1	1	1	1
transcription-from-RNA-polymerase-III-promoter:1	1	1	1	1	1	1	1	-1	1
transcription-of-nuclear-rRNA-large-RNA-polymerase-I-transcript:1	1	1	1	1	1	1	1	1	1
translational-initiation:1	-1	-1	1	-1	1	-1	-1	-1	-1
END	-2	-2	-2	-2	-2	-2	-2	-2	-2
'de-novo'-pyrimidine-base-biosynthetic-process:2	-1	2	2	-1	2	-1	2	-1	2
ATP-biosynthetic-process:2	-1	-1	-1	-1	-1	2	-1	-1	-1
ATP-hydrolysis-coupled-proton-transport:2	-1	-1	-1	2	-1	-1	-1	-1	-1
ATP-synthesis-coupled-proton-transport:2	-1	-1	-1	-1	-1	-1	-1	2	-1
CUT-catabolic-process:2	-1	-1	2	-1	2	-1	-1	-1	-1
CUT-metabolic-process:2	-1	-1	2	-1	2	-1	-1	-1	-1
DNA-catabolic-process:2	-1	2	-1	-1	-1	-1	-1	-1	-1
DNA-conformation-change:2	2	2	2	-1	-1	-1	-1	-1	-1
DNA-dependent-DNA-replication:2	2	2	2	-1	-1	-1	-1	-1	-1
DNA-dependent-DNA-replication-initiation:2	2	2	2	-1	-1	-1	-1	-1	-1
DNA-duplex-unwinding:2	-1	2	-1	-1	-1	-1	-1	-1	-1
DNA-geometric-change:2	-1	2	-1	-1	-1	-1	-1	-1	-1
DNA-metabolic-process:2	2	2	2	-1	-1	-1	-1	-1	-1
DNA-packaging:2	2	2	2	-1	-1	-1	-1	-1	-1
DNA-recombination:2	-1	2	-1	-1	-1	-1	-1	-1	-1
DNA-repair:2	2	2	-1	-1	-1	-1	-1	-1	-1
DNA-replication:2	2	2	2	-1	-1	-1	-1	-1	-1
DNA-replication,-Okazaki-fragment-processing:2	2	2	-1	-1	-1	-1	-1	-1	-1
DNA-replication,-removal-of-RNA-primer:2	2	2	-1	-1	-1	-1	-1	-1	-1
DNA-replication-dependent-nucleosome-assembly:2	2	-1	-1	-1	-1	-1	-1	-1	-1
DNA-replication-dependent-nucleosome-organization:2	2	-1	-1	-1	-1	-1	-1	-1	-1
DNA-strand-elongation:2	2	2	2	-1	-1	-1	-1	-1	-1
DNA-strand-elongation-involved-in-DNA-replication:2	2	2	2	-1	-1	-1	-1	-1	-1
DNA-unwinding-involved-in-replication:2	-1	2	-1	-1	-1	-1	-1	-1	-1
M-phase:2	2	2	-1	-1	-1	-1	-1	-1	-1
M-phase-of-mitotic-cell-cycle:2	2	2	2	-1	-1	-1	-1	-1	-1
N-glycan-processing:2	-1	-1	2	-1	-1	-1	-1	-1	-1
N-terminal-protein-amino-acid-acetylation:2	2	-1	-1	-1	2	-1	-1	-1	-1
N-terminal-protein-amino-acid-modification:2	2	2	-1	-1	2	2	2	-1	2
NLS-bearing-substrate-import-into-nucleus:2	2	2	2	-1	2	2	2	-1	2
RNA-3'-end-processing:2	2	-1	2	-1	2	2	-1	-1	-1
RNA-biosynthetic-process:2	2	-1	-1	-1	-1	-1	-1	-1	-1
RNA-catabolic-process:2	2	2	2	-1	2	2	-1	2	-1
RNA-export-from-nucleus:2	2	2	2	-1	2	2	2	2	2
RNA-localization:2	2	2	2	-1	2	2	2	2	2
RNA-metabolic-process:2	2	2	2	-1	2	2	2	2	2
RNA-methylation:2	-1	-1	-1	-1	-1	-1	-1	2	-1
RNA-modification:2	-1	-1	-1	-1	2	-1	-1	2	-1
RNA-processing:2	2	2	2	2	2	2	2	2	2
RNA-splicing:2	2	2	2	-1	-1	-1	-1	-1	-1
RNA-splicing,-via-transesterification-reactions:2	2	2	2	-1	-1	-1	-1	-1	-1
RNA-splicing,-via-transesterification-reactions-with-bulged-adenosine-as-nucleophile:2	2	2	2	-1	-1	-1	-1	-1	-1
RNA-surveillance:2	2	-1	2	2	2	2	-1	2	-1
RNA-transport:2	2	2	2	-1	2	2	2	2	2
Ras-protein-signal-transduction:2	-1	-1	2	-1	-1	-1	-1	-1	-1
Rho-protein-signal-transduction:2	-1	-1	-1	-1	-1	-1	2	-1	2
S-phase:2	2	2	2	-1	-1	-1	-1	-1	-1
S-phase-of-mitotic-cell-cycle:2	2	2	-1	-1	-1	-1	-1	-1	-1
SRP-dependent-cotranslational-protein-targeting-to-membrane:2	2	-1	-1	-1	2	-1	2	-1	-1
SRP-dependent-cotranslational-protein-targeting-to-membrane,-signal-sequence-recognition:2	2	-1	2	-1	-1	-1	-1	-1	-1
SRP-dependent-cotranslational-protein-targeting-to-membrane,-translocation:2	-1	-1	-1	-1	2	-1	2	-1	-1
U4-snRNA-3'-end-processing:2	-1	-1	-1	-1	-1	2	-1	-1	-1
acetyl-CoA-catabolic-process:2	-1	-1	-1	-1	-1	-1	-1	2	-1
acetyl-CoA-metabolic-process:2	-1	-1	-1	-1	-1	-1	-1	2	-1
aerobic-respiration:2	-1	-1	-1	-1	-1	-1	-1	2	-1
amine-biosynthetic-process:2	-1	-1	2	2	2	-1	-1	-1	-1
amine-metabolic-process:2	-1	-1	2	2	2	-1	2	-1	2
amino-acid-activation:2	2	2	2	2	2	2	2	2	2
anatomical-structure-homeostasis:2	2	2	-1	-1	-1	-1	-1	-1	-1
asparagine-metabolic-process:2	-1	-1	2	-1	-1	-1	-1	-1	-1
aspartate-family-amino-acid-biosynthetic-process:2	-1	-1	2	-1	-1	-1	-1	-1	-1
aspartate-family-amino-acid-catabolic-process:2	-1	-1	-1	-1	2	-1	-1	-1	-1
aspartate-family-amino-acid-metabolic-process:2	-1	-1	2	-1	2	-1	-1	-1	-1
barrier-septum-formation:2	-1	2	-1	-1	-1	-1	-1	-1	-1
biosynthetic-process:2	2	2	2	2	2	2	2	2	2
box-C/D-snoRNA-metabolic-process:2	-1	-1	2	-1	2	-1	-1	-1	-1
box-C/D-snoRNA-processing:2	-1	-1	2	-1	2	-1	-1	-1	-1
carbohydrate-transport:2	-1	-1	2	2	2	-1	2	-1	-1
carboxylic-acid-biosynthetic-process:2	-1	-1	2	2	2	-1	-1	-1	2
carboxylic-acid-metabolic-process:2	-1	-1	2	2	2	-1	2	-1	2
cell-cycle:2	2	2	2	-1	-1	-1	-1	-1	-1
cell-cycle-checkpoint:2	-1	2	-1	-1	-1	-1	-1	-1	-1
cell-cycle-phase:2	2	2	2	-1	-1	-1	-1	-1	-1
cell-cycle-process:2	2	2	2	-1	-1	-1	-1	-1	-1
cell-division:2	2	2	-1	-1	-1	-1	-1	-1	-1
cell-fate-commitment:2	-1	2	-1	-1	-1	-1	-1	-1	-1
cell-shape-checkpoint:2	-1	2	-1	-1	-1	-1	-1	-1	-1
cell-wall-glycoprotein-biosynthetic-process:2	-1	-1	-1	-1	-1	2	-1	-1	-1
cell-wall-mannoprotein-biosynthetic-process:2	-1	-1	-1	-1	-1	2	-1	-1	-1
cellular-alcohol-biosynthetic-process:2	-1	-1	-1	2	-1	-1	-1	-1	-1
cellular-alcohol-metabolic-process:2	-1	-1	-1	2	-1	-1	-1	-1	-1
cellular-amine-metabolic-process:2	-1	-1	2	2	2	-1	2	-1	2
cellular-amino-acid-biosynthetic-process:2	-1	-1	2	2	2	-1	-1	-1	2
cellular-amino-acid-metabolic-process:2	-1	-1	2	2	2	-1	2	-1	2
cellular-biosynthetic-process:2	2	2	2	2	2	2	2	2	2
cellular-component-assembly-at-cellular-level:2	2	2	-1	-1	-1	-1	-1	-1	-1
cellular-component-biogenesis:2	2	-1	2	-1	-1	-1	-1	2	-1
cellular-component-biogenesis-at-cellular-level:2	2	-1	2	-1	2	-1	2	2	2
cellular-component-disassembly:2	-1	2	-1	-1	-1	-1	-1	-1	-1
cellular-component-disassembly-at-cellular-level:2	-1	2	-1	-1	-1	-1	-1	-1	-1
cellular-component-organization:2	-1	2	-1	-1	-1	2	-1	-1	-1
cellular-component-organization-at-cellular-level:2	2	2	-1	-1	-1	2	2	-1	2
cellular-component-organization-or-biogenesis:2	2	2	-1	-1	-1	2	2	2	2
cellular-component-organization-or-biogenesis-at-cellular-level:2	2	2	2	-1	-1	2	2	2	2
cellular-ketone-metabolic-process:2	-1	-1	-1	2	2	-1	2	-1	2
cellular-macromolecular-complex-assembly:2	2	-1	-1	-1	-1	-1	-1	-1	-1
cellular-macromolecular-complex-disassembly:2	-1	2	-1	-1	-1	-1	-1	-1	-1
cellular-macromolecular-complex-subunit-organization:2	2	2	2	-1	-1	-1	-1	-1	-1
cellular-macromolecule-biosynthetic-process:2	2	2	2	2	2	2	2	2	2
cellular-macromolecule-metabolic-process:2	2	2	2	-1	2	2	2	2	2
cellular-metabolic-process:2	2	2	2	2	2	2	2	2	2
cellular-nitrogen-compound-metabolic-process:2	2	2	2	-1	2	-1	-1	-1	-1
cellular-process:2	2	2	2	-1	2	2	2	2	2
cellular-protein-metabolic-process:2	2	-1	2	2	2	2	2	2	2
cellular-response-to-stimulus:2	-1	2	-1	-1	-1	-1	-1	-1	-1
cellular-response-to-stress:2	2	2	-1	-1	-1	-1	-1	-1	-1
ceramide-metabolic-process:2	-1	-1	-1	-1	2	-1	-1	-1	-1
chromatin-assembly:2	2	2	2	-1	-1	-1	-1	-1	-1
chromatin-assembly-or-disassembly:2	2	2	2	-1	-1	-1	-1	-1	-1
chromatin-modification:2	2	2	-1	-1	-1	-1	-1	-1	-1
chromatin-organization:2	2	2	-1	-1	-1	-1	-1	-1	-1
chromatin-remodeling:2	2	2	-1	-1	-1	-1	-1	-1	-1
chromatin-silencing:2	2	2	2	-1	2	-1	-1	-1	2
chromatin-silencing-at-rDNA:2	2	2	2	-1	-1	-1	-1	-1	-1
chromatin-silencing-at-silent-mating-type-cassette:2	2	2	2	-1	-1	-1	-1	-1	-1
chromatin-silencing-at-telomere:2	2	2	2	-1	2	2	2	-1	2
chromosome-organization:2	2	2	2	-1	-1	-1	-1	-1	-1
chromosome-segregation:2	2	2	2	-1	-1	-1	-1	-1	-1
cleavage-involved-in-rRNA-processing:2	-1	-1	-1	-1	-1	-1	-1	2	-1
coenzyme-catabolic-process:2	-1	-1	-1	-1	-1	-1	-1	2	-1
cofactor-catabolic-process:2	-1	-1	-1	-1	-1	-1	-1	2	-1
cotranslational-protein-targeting-to-membrane:2	2	-1	-1	-1	2	-1	2	-1	-1
cytoskeleton-dependent-intracellular-transport:2	2	2	-1	-1	-1	-1	-1	-1	-1
double-strand-break-repair:2	2	2	2	-1	-1	-1	-1	-1	-1
double-strand-break-repair-via-break-induced-replication:2	2	2	-1	-1	-1	-1	-1	-1	-1
double-strand-break-repair-via-homologous-recombination:2	2	2	-1	-1	-1	-1	-1	-1	-1
double-strand-break-repair-via-nonhomologous-end-joining:2	2	2	2	-1	-1	-1	-1	-1	-1
electron-transport-chain:2	-1	-1	-1	-1	-1	-1	-1	-1	2
endoplasmic-reticulum-inheritance:2	-1	-1	-1	-1	-1	-1	-1	2	-1
energy-coupled-proton-transport,-against-electrochemical-gradient:2	-1	-1	-1	2	-1	-1	-1	-1	-1
energy-coupled-proton-transport,-down-electrochemical-gradient:2	-1	-1	-1	-1	-1	-1	-1	2	-1
ergosterol-biosynthetic-process:2	-1	-1	-1	2	-1	-1	-1	-1	-1
ergosterol-metabolic-process:2	-1	-1	-1	2	-1	-1	-1	-1	-1
establishment-of-RNA-localization:2	2	2	2	-1	2	2	2	2	2
establishment-of-nucleus-localization:2	2	-1	-1	-1	-1	-1	-1	-1	-1
establishment-of-organelle-localization:2	2	2	-1	-1	-1	-1	-1	-1	-1
establishment-of-protein-localization-in-endoplasmic-reticulum:2	2	-1	-1	-1	2	-1	-1	-1	-1
establishment-of-protein-localization-in-mitochondrion:2	-1	-1	-1	-1	2	2	2	2	2
establishment-of-ribosome-localization:2	-1	2	-1	-1	-1	2	-1	-1	-1
exonucleolytic-nuclear-transcribed-mRNA-catabolic-process-involved-in-deadenylation-dependent-decay:2	2	-1	-1	-1	-1	2	-1	2	-1
exonucleolytic-trimming-involved-in-rRNA-processing:2	-1	-1	-1	-1	-1	2	-1	2	-1
exonucleolytic-trimming-to-generate-mature-3'-end-of-5.8S-rRNA-from-tricistronic-rRNA-transcript-(SSU-rRNA,-5.8S-rRNA,-LSU-rRNA):2	2	-1	2	2	2	2	-1	2	-1
fatty-acid-biosynthetic-process:2	-1	-1	-1	2	2	-1	-1	-1	-1
fatty-acid-metabolic-process:2	-1	-1	-1	-1	2	-1	-1	-1	-1
filamentous-growth-of-a-population-of-unicellular-organisms:2	-1	-1	2	-1	-1	-1	-1	-1	-1
flocculation:2	-1	-1	2	-1	2	2	2	-1	-1
flocculation-via-cell-wall-protein-carbohydrate-interaction:2	-1	-1	2	-1	-1	2	-1	-1	-1
gene-conversion-at-mating-type-locus:2	-1	2	-1	-1	-1	-1	-1	-1	-1
gene-expression:2	2	2	2	2	2	2	2	2	2
gene-silencing:2	2	2	2	-1	2	-1	-1	-1	-1
generation-of-catalytic-spliceosome-for-second-transesterification-step:2	-1	2	-1	-1	-1	-1	-1	-1	-1
glycoprotein-biosynthetic-process:2	-1	-1	2	-1	-1	2	-1	-1	-1
glycoprotein-metabolic-process:2	-1	-1	2	-1	-1	2	-1	-1	-1
glycosylation:2	-1	-1	2	-1	-1	-1	-1	-1	-1
growth-of-unicellular-organism-as-a-thread-of-attached-cells:2	-1	-1	2	-1	-1	-1	-1	-1	-1
hexose-transport:2	-1	-1	2	2	2	-1	2	-1	-1
histone-H3-K4-methylation:2	2	-1	-1	-1	-1	-1	-1	-1	-1
histone-lysine-methylation:2	2	2	-1	-1	-1	-1	-1	-1	-1
histone-methylation:2	-1	2	-1	-1	-1	-1	-1	-1	-1
inner-mitochondrial-membrane-organization:2	-1	-1	-1	-1	-1	-1	2	-1	2
inositol-phosphorylceramide-metabolic-process:2	-1	-1	2	-1	-1	-1	-1	-1	-1
inositolphosphoceramide-metabolic-process:2	-1	-1	2	-1	2	-1	-1	-1	-1
interphase:2	-1	2	-1	-1	-1	-1	-1	-1	-1
interphase-of-mitotic-cell-cycle:2	-1	2	-1	-1	-1	-1	-1	-1	-1
intracellular-protein-transmembrane-transport:2	-1	-1	-1	-1	2	-1	2	-1	-1
intronic-box-C/D-snoRNA-processing:2	-1	-1	2	-1	2	-1	-1	-1	-1
intronic-snoRNA-processing:2	-1	-1	2	-1	2	-1	-1	-1	-1
iron-ion-homeostasis:2	-1	-1	-1	-1	-1	-1	-1	-1	2
iron-ion-transport:2	-1	-1	-1	-1	-1	-1	-1	-1	2
isoprenoid-biosynthetic-process:2	-1	-1	-1	-1	-1	-1	-1	2	-1
isoprenoid-metabolic-process:2	-1	-1	-1	-1	-1	-1	-1	2	-1
lagging-strand-elongation:2	2	2	2	-1	-1	-1	-1	-1	-1
leading-strand-elongation:2	2	2	-1	-1	-1	-1	-1	-1	-1
lipid-biosynthetic-process:2	-1	-1	-1	2	2	-1	-1	-1	2
lipid-metabolic-process:2	-1	-1	-1	2	-1	-1	-1	-1	-1
mRNA-binding-(hnRNP)-protein-import-into-nucleus:2	2	2	2	-1	2	2	2	-1	2
mRNA-catabolic-process:2	2	-1	2	-1	2	-1	-1	2	-1
mRNA-cleavage:2	2	-1	-1	-1	-1	-1	-1	-1	-1
mRNA-export-from-nucleus:2	2	2	2	-1	-1	2	-1	-1	-1
mRNA-export-from-nucleus-in-response-to-heat-stress:2	-1	2	-1	-1	-1	-1	-1	-1	-1
mRNA-metabolic-process:2	2	2	2	-1	2	-1	-1	-1	-1
mRNA-processing:2	2	2	2	-1	-1	-1	-1	-1	-1
mRNA-transport:2	2	2	2	-1	2	2	2	-1	2
macromolecular-complex-assembly:2	2	-1	-1	-1	-1	-1	-1	-1	-1
macromolecular-complex-disassembly:2	-1	2	-1	-1	-1	-1	-1	-1	-1
macromolecular-complex-subunit-organization:2	2	2	-1	-1	-1	-1	-1	-1	-1
macromolecule-biosynthetic-process:2	2	2	2	2	2	2	2	2	2
macromolecule-glycosylation:2	-1	-1	2	-1	-1	2	-1	-1	-1
macromolecule-metabolic-process:2	2	2	2	-1	2	2	2	2	2
maintenance-of-fidelity-involved-in-DNA-dependent-DNA-replication:2	2	2	-1	-1	-1	-1	-1	-1	-1
mannoprotein-biosynthetic-process:2	-1	-1	-1	-1	-1	2	-1	-1	-1
mannoprotein-metabolic-process:2	-1	-1	-1	-1	-1	2	-1	-1	-1
mating-type-determination:2	-1	2	-1	-1	-1	-1	-1	-1	-1
mating-type-switching:2	-1	2	-1	-1	-1	-1	-1	-1	-1
maturation-of-SSU-rRNA:2	-1	-1	-1	-1	-1	-1	2	2	2
maturation-of-SSU-rRNA-from-tricistronic-rRNA-transcript-(SSU-rRNA,-5.8S-rRNA,-LSU-rRNA):2	-1	-1	-1	-1	-1	-1	-1	2	2
meiotic-chromosome-segregation:2	-1	2	-1	-1	-1	-1	-1	-1	-1
membrane-lipid-biosynthetic-process:2	-1	-1	2	-1	2	-1	2	-1	2
membrane-lipid-metabolic-process:2	-1	-1	2	-1	2	-1	-1	-1	-1
metabolic-process:2	2	-1	2	2	2	2	2	2	2
microtubule-based-movement:2	2	2	-1	-1	-1	-1	-1	-1	-1
microtubule-based-process:2	2	2	2	-1	-1	-1	-1	-1	-1
microtubule-based-transport:2	2	2	-1	-1	-1	-1	-1	-1	-1
microtubule-cytoskeleton-organization:2	2	2	2	-1	-1	-1	-1	-1	-1
microtubule-nucleation:2	-1	2	-1	-1	-1	-1	-1	-1	-1
microtubule-organizing-center-organization:2	2	-1	-1	-1	-1	-1	-1	-1	-1
mismatch-repair:2	2	2	-1	-1	-1	-1	-1	-1	-1
mitochondrial-genome-maintenance:2	-1	-1	2	-1	-1	-1	-1	-1	-1
mitochondrial-membrane-organization:2	-1	-1	-1	-1	2	2	2	2	2
mitochondrial-respiratory-chain-complex-III-biogenesis:2	-1	-1	-1	-1	-1	2	-1	-1	-1
mitochondrial-translation:2	-1	-1	-1	2	2	2	2	2	2
mitochondrial-translational-initiation:2	-1	-1	-1	-1	-1	2	-1	-1	-1
mitochondrial-transport:2	-1	-1	-1	-1	2	2	2	2	2
mitochondrion-organization:2	-1	-1	-1	2	2	2	2	2	2
mitosis:2	2	2	2	-1	-1	-1	-1	-1	-1
mitotic-cell-cycle:2	2	2	2	-1	-1	-1	-1	-1	-1
mitotic-cell-cycle-checkpoint:2	-1	2	-1	-1	-1	-1	-1	-1	-1
mitotic-chromosome-condensation:2	2	2	2	-1	-1	-1	-1	-1	-1
mitotic-sister-chromatid-cohesion:2	2	2	2	-1	-1	-1	-1	-1	-1
mitotic-sister-chromatid-segregation:2	2	2	2	-1	-1	-1	-1	-1	-1
mitotic-spindle-organization:2	2	2	-1	-1	-1	-1	-1	-1	-1
mitotic-spindle-organization-in-nucleus:2	-1	2	2	-1	-1	-1	-1	-1	-1
monosaccharide-transport:2	-1	-1	2	2	2	-1	2	-1	-1
ncRNA-3'-end-processing:2	2	-1	2	2	2	2	2	2	2
ncRNA-catabolic-process:2	2	-1	2	-1	2	2	-1	2	-1
ncRNA-metabolic-process:2	2	-1	2	2	2	2	2	2	2
ncRNA-processing:2	2	-1	2	2	2	2	2	2	2
negative-regulation-of-DNA-metabolic-process:2	-1	2	-1	-1	-1	-1	-1	-1	-1
negative-regulation-of-RNA-metabolic-process:2	2	2	2	-1	2	-1	-1	-1	-1
negative-regulation-of-biological-process:2	2	2	2	-1	-1	-1	-1	-1	-1
negative-regulation-of-biosynthetic-process:2	2	2	2	-1	-1	-1	-1	-1	-1
negative-regulation-of-cell-cycle:2	-1	2	-1	-1	-1	-1	-1	-1	-1
negative-regulation-of-cellular-biosynthetic-process:2	2	2	2	-1	-1	-1	-1	-1	-1
negative-regulation-of-cellular-macromolecule-biosynthetic-process:2	2	2	2	-1	2	-1	-1	-1	-1
negative-regulation-of-cellular-metabolic-process:2	2	2	2	-1	-1	-1	-1	-1	-1
negative-regulation-of-cellular-process:2	2	2	2	-1	-1	-1	-1	-1	-1
negative-regulation-of-gene-expression:2	2	2	2	-1	2	-1	-1	-1	-1
negative-regulation-of-gene-expression,-epigenetic:2	2	2	2	-1	2	-1	-1	-1	2
negative-regulation-of-macromolecule-biosynthetic-process:2	2	2	2	-1	2	-1	-1	-1	-1
negative-regulation-of-macromolecule-metabolic-process:2	2	2	2	-1	2	-1	-1	-1	-1
negative-regulation-of-metabolic-process:2	2	2	2	-1	-1	-1	-1	-1	-1
negative-regulation-of-nitrogen-compound-metabolic-process:2	2	2	2	-1	-1	-1	-1	-1	-1
negative-regulation-of-nucleobase,-nucleoside,-nucleotide-and-nucleic-acid-metabolic-process:2	2	2	2	-1	-1	-1	-1	-1	-1
negative-regulation-of-transcription,-DNA-dependent:2	2	2	2	-1	2	-1	-1	-1	-1
negative-regulation-of-transposition:2	-1	2	-1	-1	-1	-1	-1	-1	-1
negative-regulation-of-transposition,-RNA-mediated:2	-1	2	-1	-1	-1	-1	-1	-1	-1
nitrogen-compound-metabolic-process:2	2	2	2	-1	-1	-1	-1	-1	-1
non-recombinational-repair:2	-1	2	-1	-1	-1	-1	-1	-1	-1
nonfunctional-rRNA-decay:2	2	-1	2	-1	-1	2	-1	2	-1
nuclear-RNA-surveillance:2	2	-1	2	2	2	2	-1	2	-1
nuclear-division:2	2	2	2	-1	-1	-1	-1	-1	-1
nuclear-export:2	2	2	2	-1	2	2	2	2	2
nuclear-import:2	2	2	2	-1	2	2	2	-1	2
nuclear-mRNA-splicing,-via-spliceosome:2	2	2	2	-1	-1	-1	-1	-1	-1
nuclear-mRNA-surveillance:2	-1	-1	-1	-1	-1	-1	-1	2	-1
nuclear-migration:2	2	-1	-1	-1	-1	-1	-1	-1	-1
nuclear-migration-along-microtubule:2	2	-1	-1	-1	-1	-1	-1	-1	-1
nuclear-ncRNA-surveillance:2	2	-1	2	2	2	2	2	2	2
nuclear-polyadenylation-dependent-CUT-catabolic-process:2	-1	-1	2	-1	2	-1	-1	-1	-1
nuclear-polyadenylation-dependent-mRNA-catabolic-process:2	2	-1	2	2	2	2	2	2	2
nuclear-polyadenylation-dependent-ncRNA-catabolic-process:2	2	-1	2	2	2	2	2	2	2
nuclear-polyadenylation-dependent-rRNA-catabolic-process:2	-1	-1	2	-1	2	2	-1	2	-1
nuclear-polyadenylation-dependent-snRNA-catabolic-process:2	-1	-1	2	-1	-1	-1	-1	-1	-1
nuclear-polyadenylation-dependent-snoRNA-catabolic-process:2	-1	-1	2	-1	-1	-1	-1	-1	-1
nuclear-polyadenylation-dependent-tRNA-catabolic-process:2	2	-1	2	2	2	2	2	2	2
nuclear-pore-organization:2	2	2	2	-1	2	2	2	-1	2
nuclear-transcribed-mRNA-catabolic-process:2	2	-1	2	-1	2	-1	-1	2	-1
nuclear-transcribed-mRNA-catabolic-process,-3'-5'-exonucleolytic-nonsense-mediated-decay:2	2	-1	-1	-1	-1	2	-1	2	-1
nuclear-transcribed-mRNA-catabolic-process,-deadenylation-dependent-decay:2	2	-1	-1	-1	-1	-1	-1	-1	-1
nuclear-transcribed-mRNA-catabolic-process,-exonucleolytic:2	2	-1	2	-1	2	2	-1	2	-1
nuclear-transcribed-mRNA-catabolic-process,-exonucleolytic,-3'-5':2	2	-1	-1	-1	-1	2	-1	2	-1
nuclear-transcribed-mRNA-catabolic-process,-non-stop-decay:2	2	-1	2	-1	-1	-1	-1	2	-1
nuclear-transcribed-mRNA-catabolic-process,-nonsense-mediated-decay:2	2	-1	-1	-1	-1	-1	-1	2	-1
nuclear-transport:2	2	2	2	-1	2	2	2	2	2
nucleic-acid-metabolic-process:2	2	2	2	-1	2	-1	-1	2	-1
nucleic-acid-transport:2	2	2	2	-1	2	2	2	2	2
nucleobase,-nucleoside,-nucleotide-and-nucleic-acid-metabolic-process:2	2	2	2	-1	-1	-1	-1	2	-1
nucleobase,-nucleoside,-nucleotide-and-nucleic-acid-transport:2	2	2	2	-1	2	2	2	2	2
nucleobase-biosynthetic-process:2	-1	-1	-1	-1	2	-1	2	2	2
nucleobase-metabolic-process:2	-1	-1	-1	-1	-1	-1	-1	2	2
nucleobase-transport:2	-1	-1	-1	-1	-1	2	-1	-1	-1
nucleocytoplasmic-transport:2	2	2	2	-1	2	2	2	2	2
nucleoside-biosynthetic-process:2	-1	-1	-1	-1	-1	-1	-1	2	-1
nucleoside-metabolic-process:2	-1	-1	-1	-1	2	-1	2	2	2
nucleoside-salvage:2	-1	-1	-1	-1	-1	-1	-1	2	-1
nucleoside-triphosphate-biosynthetic-process:2	-1	-1	-1	-1	-1	2	-1	-1	-1
nucleosome-assembly:2	2	-1	2	-1	-1	-1	-1	-1	-1
nucleosome-organization:2	2	-1	-1	-1	-1	-1	-1	-1	-1
nucleosome-positioning:2	2	-1	-1	-1	-1	-1	-1	-1	-1
nucleotide-biosynthetic-process:2	-1	-1	-1	-1	-1	2	-1	-1	-1
nucleotide-excision-repair:2	-1	2	-1	-1	-1	-1	-1	-1	-1
nucleotide-sugar-transport:2	-1	-1	-1	-1	-1	-1	2	-1	-1
nucleus-localization:2	2	-1	-1	-1	-1	-1	-1	-1	-1
nucleus-organization:2	2	2	2	-1	-1	-1	-1	-1	2
one-carbon-metabolic-process:2	-1	-1	-1	-1	2	-1	-1	-1	-1
organelle-assembly:2	-1	-1	-1	-1	-1	-1	-1	2	-1
organelle-fission:2	2	2	2	-1	-1	-1	-1	-1	-1
organelle-localization:2	-1	2	-1	-1	-1	-1	-1	-1	-1
organelle-organization:2	-1	-1	-1	-1	2	2	2	-1	2
organelle-transport-along-microtubule:2	2	2	-1	-1	-1	-1	-1	-1	-1
organic-acid-biosynthetic-process:2	-1	-1	2	2	2	-1	-1	-1	2
organic-acid-metabolic-process:2	-1	-1	2	2	2	-1	2	-1	2
organic-alcohol-transport:2	-1	-1	2	-1	-1	-1	-1	-1	-1
organic-substance-transport:2	-1	-1	2	-1	2	-1	-1	-1	-1
outer-mitochondrial-membrane-organization:2	-1	-1	-1	-1	-1	-1	-1	2	-1
oxoacid-metabolic-process:2	-1	-1	2	2	2	-1	2	-1	2
pantothenate-biosynthetic-process:2	2	-1	2	-1	2	-1	-1	-1	-1
pantothenate-metabolic-process:2	2	-1	2	-1	2	-1	-1	-1	-1
phytosteroid-biosynthetic-process:2	-1	-1	-1	2	-1	-1	-1	-1	-1
phytosteroid-metabolic-process:2	-1	-1	-1	2	-1	-1	-1	-1	-1
poly(A)+-mRNA-export-from-nucleus:2	2	2	-1	-1	-1	2	-1	-1	-1
polyadenylation-dependent-RNA-catabolic-process:2	2	-1	2	2	2	2	2	2	2
polyadenylation-dependent-mRNA-catabolic-process:2	2	-1	2	2	2	2	2	2	2
polyadenylation-dependent-ncRNA-catabolic-process:2	2	-1	2	2	2	2	2	2	2
polyadenylation-dependent-snoRNA-3'-end-processing:2	2	-1	2	2	2	2	2	2	2
polyol-transport:2	-1	-1	2	-1	-1	-1	-1	-1	-1
positive-regulation-of-cellular-protein-metabolic-process:2	-1	-1	-1	-1	-1	-1	-1	-1	2
positive-regulation-of-histone-acetylation:2	2	-1	2	-1	-1	-1	-1	-1	-1
positive-regulation-of-histone-modification:2	2	-1	2	-1	-1	-1	-1	-1	-1
positive-regulation-of-mitochondrial-translation:2	-1	-1	-1	-1	-1	2	-1	-1	-1
positive-regulation-of-mitochondrion-organization:2	-1	-1	-1	-1	-1	2	-1	-1	-1
positive-regulation-of-peptidyl-lysine-acetylation:2	2	-1	2	-1	-1	-1	-1	-1	-1
positive-regulation-of-protein-metabolic-process:2	-1	-1	-1	-1	-1	-1	-1	-1	2
positive-regulation-of-protein-modification-process:2	2	-1	-1	-1	-1	-1	-1	-1	-1
positive-regulation-of-spindle-pole-body-separation:2	-1	-1	2	-1	2	-1	2	-1	2
positive-regulation-of-transcription-elongation,-DNA-dependent:2	-1	2	-1	-1	-1	-1	-1	-1	-1
positive-regulation-of-translation:2	-1	-1	-1	-1	-1	-1	2	2	2
posttranscriptional-regulation-of-gene-expression:2	2	2	2	-1	2	2	2	2	2
pre-replicative-complex-assembly:2	2	2	-1	-1	-1	-1	-1	-1	-1
primary-metabolic-process:2	2	2	2	2	2	2	2	2	2
protein-DNA-complex-assembly:2	2	2	2	-1	-1	-1	-1	-1	-1
protein-DNA-complex-subunit-organization:2	2	2	2	-1	-1	-1	-1	-1	-1
protein-N-linked-glycosylation:2	-1	-1	2	-1	-1	-1	-1	-1	-1
protein-alkylation:2	-1	2	-1	-1	-1	-1	-1	-1	-1
protein-export-from-nucleus:2	2	2	2	-1	-1	2	2	-1	2
protein-glycosylation:2	-1	-1	2	-1	-1	2	-1	-1	-1
protein-import:2	2	-1	-1	-1	2	2	2	-1	2
protein-import-into-mitochondrial-inner-membrane:2	-1	-1	-1	-1	2	2	2	-1	2
protein-import-into-mitochondrial-matrix:2	2	-1	2	2	2	2	2	2	2
protein-import-into-nucleus:2	2	2	2	-1	2	2	2	-1	2
protein-localization-in-endoplasmic-reticulum:2	2	-1	-1	-1	2	-1	-1	-1	-1
protein-localization-in-mitochondrion:2	-1	-1	-1	-1	2	2	2	2	2
protein-localization-to-nucleus:2	2	2	2	-1	2	2	2	-1	2
protein-metabolic-process:2	2	-1	2	2	2	2	2	2	2
protein-methylation:2	-1	2	-1	-1	-1	-1	-1	-1	-1
protein-targeting-to-ER:2	2	-1	-1	-1	2	-1	-1	-1	-1
protein-targeting-to-membrane:2	-1	-1	-1	-1	2	-1	-1	-1	-1
protein-targeting-to-mitochondrion:2	-1	-1	-1	-1	2	2	2	2	2
protein-transmembrane-transport:2	-1	-1	-1	-1	2	-1	2	-1	-1
purine-containing-compound-biosynthetic-process:2	-1	-1	-1	-1	-1	2	-1	-1	-1
purine-nucleoside-triphosphate-biosynthetic-process:2	-1	-1	-1	-1	-1	2	-1	-1	-1
purine-nucleoside-triphosphate-metabolic-process:2	-1	-1	-1	-1	-1	2	-1	-1	-1
purine-nucleotide-biosynthetic-process:2	-1	-1	-1	-1	-1	2	-1	-1	-1
purine-nucleotide-metabolic-process:2	-1	-1	-1	-1	-1	2	-1	-1	-1
purine-ribonucleoside-salvage:2	-1	-1	-1	-1	-1	-1	-1	2	-1
purine-ribonucleoside-triphosphate-biosynthetic-process:2	-1	-1	-1	-1	-1	2	-1	-1	-1
purine-ribonucleoside-triphosphate-metabolic-process:2	-1	-1	-1	-1	-1	2	-1	-1	-1
purine-ribonucleotide-biosynthetic-process:2	-1	-1	-1	-1	-1	2	-1	-1	-1
purine-ribonucleotide-metabolic-process:2	-1	-1	-1	-1	-1	2	-1	-1	-1
pyrimidine-base-biosynthetic-process:2	-1	-1	2	-1	2	-1	2	-1	2
pyrimidine-base-metabolic-process:2	-1	2	2	-1	2	-1	2	-1	2
pyrimidine-containing-compound-biosynthetic-process:2	-1	-1	-1	-1	2	-1	2	-1	2
pyrimidine-containing-compound-metabolic-process:2	-1	-1	-1	-1	2	-1	2	-1	2
pyrimidine-nucleoside-metabolic-process:2	-1	-1	-1	-1	2	-1	2	-1	2
pyrimidine-nucleotide-biosynthetic-process:2	-1	-1	-1	-1	2	-1	2	-1	2
pyrimidine-nucleotide-metabolic-process:2	-1	-1	2	-1	2	-1	2	-1	2
pyrimidine-ribonucleoside-metabolic-process:2	-1	-1	-1	-1	2	-1	2	-1	2
pyrimidine-ribonucleotide-biosynthetic-process:2	-1	-1	-1	-1	2	-1	-1	-1	2
pyrimidine-ribonucleotide-metabolic-process:2	-1	-1	-1	-1	2	-1	-1	-1	2
rRNA-3'-end-processing:2	2	-1	2	2	2	2	2	2	2
rRNA-catabolic-process:2	2	-1	2	-1	2	2	-1	2	-1
rRNA-containing-ribonucleoprotein-complex-export-from-nucleus:2	-1	2	-1	-1	-1	2	-1	-1	-1
rRNA-export-from-nucleus:2	2	-1	2	2	2	2	2	2	2
rRNA-metabolic-process:2	-1	-1	2	-1	2	-1	2	2	2
rRNA-processing:2	-1	-1	2	-1	2	-1	2	2	2
rRNA-transport:2	2	-1	2	2	2	2	2	2	2
recombinational-repair:2	2	2	-1	-1	-1	-1	-1	-1	-1
regulation-of-DNA-metabolic-process:2	-1	2	-1	-1	-1	-1	-1	-1	-1
regulation-of-DNA-recombination:2	-1	2	-1	-1	-1	-1	-1	-1	-1
regulation-of-RNA-metabolic-process:2	2	2	-1	-1	-1	-1	-1	-1	-1
regulation-of-biological-process:2	2	2	-1	-1	-1	-1	-1	-1	-1
regulation-of-biosynthetic-process:2	2	2	2	-1	-1	-1	-1	-1	-1
regulation-of-cell-cycle:2	-1	2	-1	-1	-1	-1	-1	-1	-1
regulation-of-cell-cycle-arrest:2	-1	2	-1	-1	-1	-1	-1	-1	-1
regulation-of-cell-cycle-process:2	-1	2	-1	-1	-1	-1	-1	-1	-1
regulation-of-cellular-biosynthetic-process:2	2	2	2	-1	-1	-1	-1	-1	-1
regulation-of-cellular-macromolecule-biosynthetic-process:2	2	2	2	-1	-1	-1	-1	-1	-1
regulation-of-cellular-metabolic-process:2	2	2	-1	-1	-1	-1	-1	-1	-1
regulation-of-cellular-process:2	2	2	-1	-1	-1	-1	-1	-1	-1
regulation-of-cellular-protein-metabolic-process:2	2	2	2	-1	2	2	2	2	2
regulation-of-chromosome-organization:2	2	-1	-1	-1	-1	-1	-1	-1	-1
regulation-of-gene-expression:2	2	2	2	-1	-1	-1	-1	-1	-1
regulation-of-gene-expression,-epigenetic:2	2	2	2	-1	2	-1	-1	-1	-1
regulation-of-histone-acetylation:2	2	-1	2	-1	-1	-1	-1	-1	-1
regulation-of-histone-modification:2	2	-1	2	-1	-1	-1	-1	-1	-1
regulation-of-macromolecule-biosynthetic-process:2	2	2	2	-1	-1	-1	-1	-1	-1
regulation-of-macromolecule-metabolic-process:2	2	2	2	-1	-1	-1	-1	-1	-1
regulation-of-metabolic-process:2	2	2	-1	-1	-1	-1	-1	-1	-1
regulation-of-mitochondrial-translation:2	-1	-1	-1	-1	-1	-1	-1	-1	2
regulation-of-mitochondrion-organization:2	-1	-1	-1	-1	-1	2	2	-1	2
regulation-of-mitotic-cell-cycle:2	-1	2	-1	-1	-1	-1	-1	-1	-1
regulation-of-nitrogen-compound-metabolic-process:2	2	2	-1	-1	-1	-1	-1	-1	-1
regulation-of-nucleobase,-nucleoside,-nucleotide-and-nucleic-acid-metabolic-process:2	2	2	-1	-1	-1	-1	-1	-1	-1
regulation-of-peptidyl-lysine-acetylation:2	2	-1	2	-1	-1	-1	-1	-1	-1
regulation-of-primary-metabolic-process:2	2	2	-1	-1	-1	-1	-1	-1	-1
regulation-of-protein-metabolic-process:2	2	2	2	-1	2	-1	2	2	2
regulation-of-spindle-pole-body-separation:2	-1	-1	-1	-1	-1	-1	-1	2	-1
regulation-of-transcription,-DNA-dependent:2	2	2	-1	-1	-1	-1	-1	-1	-1
regulation-of-transcription-by-chromatin-organization:2	-1	-1	-1	-1	-1	2	-1	-1	-1
regulation-of-transcription-elongation,-DNA-dependent:2	-1	2	-1	-1	-1	-1	-1	-1	-1
regulation-of-transcription-from-RNA-polymerase-III-promoter:2	-1	2	-1	-1	2	-1	2	-1	2
regulation-of-translation:2	2	2	2	-1	2	2	2	2	2
regulation-of-translational-elongation:2	2	2	2	-1	2	2	2	2	2
regulation-of-translational-fidelity:2	2	-1	2	-1	2	2	2	2	2
regulation-of-translational-initiation:2	2	2	2	-1	2	-1	-1	2	-1
response-to-DNA-damage-stimulus:2	2	2	-1	-1	-1	-1	-1	-1	-1
response-to-organic-cyclic-compound:2	-1	-1	2	-1	-1	-1	-1	-1	-1
response-to-stress:2	-1	2	-1	-1	-1	-1	-1	-1	-1
ribonucleoprotein-complex-assembly:2	-1	-1	2	-1	-1	-1	-1	2	-1
ribonucleoprotein-complex-biogenesis:2	2	-1	2	-1	2	-1	2	2	2
ribonucleoprotein-complex-export-from-nucleus:2	-1	2	-1	-1	-1	2	-1	-1	-1
ribonucleoprotein-complex-localization:2	-1	2	-1	-1	-1	2	-1	-1	-1
ribonucleoprotein-complex-subunit-organization:2	-1	-1	2	-1	-1	-1	-1	2	-1
ribonucleoside-biosynthetic-process:2	-1	-1	-1	-1	-1	-1	-1	2	-1
ribonucleoside-metabolic-process:2	-1	-1	2	-1	2	-1	2	2	2
ribonucleoside-triphosphate-biosynthetic-process:2	-1	-1	-1	-1	-1	2	-1	-1	-1
ribonucleoside-triphosphate-metabolic-process:2	-1	-1	-1	-1	-1	2	-1	-1	-1
ribonucleotide-biosynthetic-process:2	-1	-1	-1	-1	-1	2	-1	-1	-1
ribonucleotide-metabolic-process:2	-1	-1	-1	-1	-1	2	-1	-1	-1
ribosomal-large-subunit-assembly:2	-1	-1	-1	-1	-1	-1	-1	2	-1
ribosomal-protein-import-into-nucleus:2	2	-1	2	-1	2	2	2	-1	2
ribosomal-small-subunit-assembly:2	-1	-1	2	2	2	-1	2	2	2
ribosomal-small-subunit-biogenesis:2	-1	-1	-1	-1	-1	-1	2	2	2
ribosomal-subunit-export-from-nucleus:2	-1	2	-1	-1	-1	2	-1	-1	-1
ribosome-assembly:2	-1	-1	2	-1	2	-1	2	2	2
ribosome-biogenesis:2	2	-1	2	2	2	2	2	2	2
ribosome-localization:2	-1	2	-1	-1	-1	2	-1	-1	-1
sex-determination:2	-1	2	-1	-1	-1	-1	-1	-1	-1
sister-chromatid-cohesion:2	2	2	2	-1	-1	-1	-1	-1	-1
sister-chromatid-segregation:2	2	2	2	-1	-1	-1	-1	-1	-1
small-molecule-biosynthetic-process:2	-1	-1	-1	2	2	-1	-1	-1	2
small-molecule-metabolic-process:2	-1	-1	-1	2	-1	-1	-1	-1	-1
snRNA-3'-end-processing:2	-1	-1	-1	-1	-1	2	-1	-1	-1
snRNA-catabolic-process:2	-1	-1	2	-1	-1	-1	-1	-1	-1
snRNA-export-from-nucleus:2	2	-1	2	-1	2	2	2	-1	2
snRNA-processing:2	-1	-1	-1	-1	-1	2	2	-1	2
snRNA-transport:2	2	-1	2	-1	2	2	2	-1	2
snRNP-protein-import-into-nucleus:2	2	-1	2	-1	2	2	2	-1	2
snoRNA-3'-end-processing:2	2	-1	2	-1	2	2	2	2	2
snoRNA-catabolic-process:2	-1	-1	2	-1	-1	-1	-1	-1	-1
snoRNA-metabolic-process:2	2	-1	2	2	2	2	2	2	2
snoRNA-processing:2	2	-1	2	2	2	2	2	2	2
sphingoid-metabolic-process:2	-1	-1	2	-1	2	-1	-1	-1	-1
sphingolipid-biosynthetic-process:2	-1	-1	2	-1	2	-1	2	-1	2
sphingolipid-metabolic-process:2	-1	-1	2	-1	2	-1	-1	-1	-1
spindle-organization:2	2	2	-1	-1	-1	-1	-1	-1	-1
spindle-pole-body-duplication:2	2	-1	-1	-1	-1	-1	-1	-1	-1
spindle-pole-body-duplication-in-nuclear-envelope:2	2	-1	-1	-1	-1	-1	-1	-1	-1
spindle-pole-body-organization:2	2	-1	-1	-1	-1	-1	-1	-1	-1
spliceosomal-conformational-changes-to-generate-catalytic-conformation:2	-1	2	-1	-1	-1	-1	-1	-1	-1
steroid-biosynthetic-process:2	-1	-1	2	2	-1	-1	-1	2	-1
steroid-metabolic-process:2	-1	-1	2	2	-1	-1	-1	-1	-1
sterol-biosynthetic-process:2	-1	-1	2	2	-1	-1	-1	2	-1
sterol-metabolic-process:2	-1	-1	2	2	-1	-1	-1	-1	-1
tRNA-aminoacylation:2	2	2	2	2	2	2	2	2	2
tRNA-aminoacylation-for-protein-translation:2	2	2	2	2	2	2	2	2	2
tRNA-catabolic-process:2	2	-1	2	2	2	2	2	2	2
tRNA-export-from-nucleus:2	2	-1	-1	-1	2	2	2	-1	2
tRNA-gene-clustering:2	-1	2	-1	-1	-1	-1	-1	-1	-1
tRNA-metabolic-process:2	2	2	2	2	2	2	2	2	2
tRNA-methylation:2	-1	-1	-1	-1	-1	-1	2	2	-1
tRNA-modification:2	-1	-1	-1	-1	2	-1	2	2	-1
tRNA-processing:2	2	-1	2	2	2	2	2	2	2
tRNA-transcription:2	-1	-1	-1	-1	-1	-1	-1	2	-1
tRNA-transcription-from-RNA-polymerase-III-promoter:2	-1	-1	-1	-1	-1	-1	-1	2	-1
tRNA-transport:2	2	-1	-1	-1	2	2	2	-1	2
tRNA-wobble-position-uridine-thiolation:2	-1	-1	2	-1	-1	-1	-1	-1	-1
telomere-capping:2	-1	2	-1	-1	-1	-1	-1	-1	-1
telomere-maintenance:2	2	2	-1	-1	-1	-1	-1	-1	-1
telomere-organization:2	2	2	-1	-1	-1	-1	-1	-1	-1
termination-of-RNA-polymerase-II-transcription:2	2	-1	-1	-1	-1	2	-1	-1	-1
termination-of-RNA-polymerase-II-transcription,-poly(A)-coupled:2	2	-1	-1	-1	-1	-1	-1	-1	-1
threonine-metabolic-process:2	-1	-1	-1	-1	2	-1	-1	-1	-1
transcription,-DNA-dependent:2	2	-1	-1	-1	-1	-1	-1	-1	-1
transcription-coupled-nucleotide-excision-repair:2	2	2	-1	-1	-1	-1	-1	-1	-1
transcription-elongation,-DNA-dependent:2	2	2	-1	-1	-1	-1	-1	-1	-1
transcription-elongation-from-RNA-polymerase-II-promoter:2	-1	2	-1	-1	-1	-1	-1	-1	-1
transcription-from-RNA-polymerase-II-promoter:2	2	-1	-1	-1	-1	-1	-1	-1	-1
transcription-from-RNA-polymerase-III-promoter:2	-1	-1	-1	-1	-1	-1	-1	2	-1
transcription-termination,-DNA-dependent:2	-1	-1	-1	-1	-1	2	-1	-1	-1
translation:2	2	2	2	2	2	2	2	2	2
translational-elongation:2	-1	-1	-1	-1	2	2	-1	-1	-1
translational-initiation:2	2	2	2	2	2	2	2	2	2
transmembrane-transport:2	-1	-1	2	2	2	2	2	-1	-1
transposition:2	-1	2	-1	-1	-1	-1	-1	-1	-1
tricarboxylic-acid-cycle:2	-1	-1	-1	-1	-1	-1	-1	2	-1
tubulin-complex-assembly:2	2	-1	-1	-1	-1	-1	-1	-1	-1
tubulin-complex-biogenesis:2	2	-1	-1	-1	-1	-1	-1	-1	-1
END	-2	-2	-2	-2	-2	-2	-2	-2	-2
ATP-catabolic-process:3	-1	-1	3	-1	3	-1	-1	-1	-1
ATP-synthesis-coupled-electron-transport:3	-1	-1	-1	3	-1	-1	-1	-1	-1
ATP-synthesis-coupled-proton-transport:3	-1	-1	-1	3	-1	-1	-1	-1	-1
G-protein-coupled-receptor-protein-signaling-pathway:3	-1	3	-1	-1	3	-1	-1	-1	-1
aerobic-respiration:3	-1	-1	-1	3	-1	-1	-1	-1	-1
alcohol-metabolic-process:3	-1	-1	-1	-1	-1	-1	3	-1	-1
amide-transport:3	-1	-1	3	-1	-1	-1	-1	-1	-1
amine-biosynthetic-process:3	-1	-1	-1	-1	3	3	3	3	-1
amine-metabolic-process:3	-1	-1	-1	-1	-1	-1	3	3	3
amine-transport:3	-1	-1	-1	-1	-1	3	-1	-1	-1
amino-acid-transport:3	-1	-1	-1	-1	-1	3	-1	-1	-1
ammonium-transport:3	-1	-1	3	-1	3	-1	-1	-1	-1
anatomical-structure-development:3	3	-1	-1	-1	3	-1	-1	-1	-1
anatomical-structure-formation-involved-in-morphogenesis:3	3	-1	3	-1	3	-1	-1	-1	-1
anatomical-structure-morphogenesis:3	3	-1	-1	-1	3	-1	-1	-1	-1
anion-transport:3	-1	-1	3	-1	3	-1	-1	-1	-1
arginine-biosynthetic-process:3	-1	3	3	-1	3	-1	-1	-1	-1
arginine-metabolic-process:3	-1	3	3	-1	3	-1	-1	-1	-1
ascospore-wall-assembly:3	3	-1	-1	-1	-1	-1	-1	-1	-1
ascospore-wall-biogenesis:3	3	-1	-1	-1	-1	-1	-1	-1	-1
axial-cellular-bud-site-selection:3	-1	-1	-1	-1	3	-1	-1	-1	-1
biosynthetic-process:3	-1	-1	-1	-1	-1	3	-1	-1	-1
branched-chain-family-amino-acid-biosynthetic-process:3	-1	-1	-1	-1	3	-1	-1	-1	-1
carbohydrate-metabolic-process:3	-1	-1	-1	-1	3	-1	-1	-1	-1
carbohydrate-transport:3	3	3	3	3	3	3	-1	-1	-1
carbon-catabolite-regulation-of-transcription:3	-1	-1	3	-1	3	-1	-1	-1	-1
carbon-catabolite-regulation-of-transcription-from-RNA-polymerase-II-promoter:3	-1	-1	3	-1	3	-1	-1	-1	-1
carboxylic-acid-biosynthetic-process:3	-1	-1	-1	-1	3	3	3	3	-1
carboxylic-acid-catabolic-process:3	-1	-1	-1	-1	-1	-1	-1	3	-1
carboxylic-acid-metabolic-process:3	-1	-1	-1	-1	-1	3	3	3	3
carboxylic-acid-transport:3	-1	-1	-1	-1	-1	3	-1	3	-1
cation-homeostasis:3	-1	3	-1	-1	-1	-1	3	-1	-1
cation-transport:3	-1	3	3	-1	3	-1	3	-1	-1
cell-differentiation:3	3	-1	3	-1	3	-1	-1	-1	-1
cell-surface-receptor-linked-signaling-pathway:3	-1	3	-1	-1	-1	-1	-1	-1	-1
cell-wall-assembly:3	3	-1	-1	-1	-1	-1	-1	-1	-1
cell-wall-biogenesis:3	3	-1	-1	-1	-1	-1	-1	-1	-1
cell-wall-macromolecule-metabolic-process:3	-1	-1	-1	-1	-1	3	-1	-1	-1
cell-wall-organization:3	3	-1	-1	-1	3	-1	-1	-1	-1
cell-wall-organization-or-biogenesis:3	3	-1	-1	-1	3	3	-1	-1	-1
cellular-alcohol-biosynthetic-process:3	-1	-1	-1	-1	-1	3	3	-1	-1
cellular-alcohol-metabolic-process:3	-1	-1	-1	-1	-1	3	3	-1	-1
cellular-amide-catabolic-process:3	-1	-1	3	-1	3	-1	-1	-1	-1
cellular-amide-metabolic-process:3	-1	-1	-1	-1	-1	3	-1	-1	-1
cellular-amine-metabolic-process:3	-1	-1	-1	-1	-1	-1	3	3	-1
cellular-amino-acid-biosynthetic-process:3	-1	-1	-1	-1	3	3	3	3	-1
cellular-amino-acid-metabolic-process:3	-1	-1	-1	-1	-1	-1	3	-1	-1
cellular-biosynthetic-process:3	-1	-1	-1	-1	-1	3	-1	-1	-1
cellular-carbohydrate-metabolic-process:3	-1	-1	-1	-1	3	-1	-1	-1	-1
cellular-cell-wall-organization:3	3	-1	-1	-1	3	-1	-1	-1	-1
cellular-cell-wall-organization-or-biogenesis:3	3	-1	-1	-1	3	-1	-1	-1	-1
cellular-component-assembly-involved-in-morphogenesis:3	3	-1	-1	-1	-1	-1	-1	-1	-1
cellular-developmental-process:3	3	-1	-1	-1	3	-1	-1	-1	-1
cellular-divalent-inorganic-cation-homeostasis:3	-1	-1	-1	-1	3	-1	-1	-1	-1
cellular-glucan-metabolic-process:3	-1	-1	-1	-1	3	-1	-1	-1	-1
cellular-iron-ion-homeostasis:3	-1	3	-1	-1	-1	-1	3	-1	-1
cellular-ketone-metabolic-process:3	-1	-1	-1	-1	-1	3	3	3	3
cellular-lipid-metabolic-process:3	-1	-1	-1	-1	-1	-1	-1	3	-1
cellular-macromolecule-biosynthetic-process:3	-1	-1	-1	-1	-1	3	-1	-1	-1
cellular-metal-ion-homeostasis:3	-1	-1	-1	-1	-1	-1	3	-1	-1
cellular-nitrogen-compound-biosynthetic-process:3	-1	-1	-1	-1	3	3	-1	3	-1
cellular-nitrogen-compound-catabolic-process:3	-1	-1	-1	-1	3	-1	-1	-1	-1
cellular-process-involved-in-reproduction:3	3	3	-1	-1	-1	-1	-1	-1	-1
cellular-respiration:3	-1	-1	-1	3	-1	-1	-1	-1	-1
cellular-response-to-nutrient:3	-1	-1	3	-1	3	-1	-1	-1	-1
cellular-zinc-ion-homeostasis:3	-1	3	3	-1	3	-1	-1	-1	-1
chemical-homeostasis:3	-1	-1	-1	-1	-1	-1	3	-1	-1
chromosome-segregation:3	-1	-1	-1	-1	-1	-1	-1	3	-1
coenzyme-metabolic-process:3	-1	-1	-1	3	-1	-1	-1	-1	-1
cofactor-biosynthetic-process:3	-1	-1	-1	3	-1	-1	-1	-1	-1
cofactor-metabolic-process:3	-1	-1	-1	3	-1	-1	-1	-1	-1
copper-ion-import:3	-1	-1	3	-1	3	-1	3	-1	-1
copper-ion-transmembrane-transport:3	-1	-1	3	-1	3	-1	3	-1	-1
copper-ion-transport:3	-1	-1	3	-1	3	-1	3	-1	-1
cytokinesis,-completion-of-separation:3	-1	3	-1	-1	-1	3	-1	-1	-1
cytokinetic-cell-separation:3	-1	3	-1	-1	-1	3	-1	-1	-1
deoxyribonucleotide-metabolic-process:3	-1	3	-1	-1	-1	-1	-1	-1	-1
dephosphorylation:3	-1	-1	-1	-1	3	-1	-1	-1	-1
developmental-process:3	3	-1	-1	-1	-1	-1	-1	-1	-1
developmental-process-involved-in-reproduction:3	3	-1	-1	-1	-1	-1	-1	-1	-1
dicarboxylic-acid-transport:3	-1	-1	-1	-1	3	-1	-1	-1	-1
disaccharide-catabolic-process:3	-1	-1	-1	-1	-1	-1	-1	3	-1
divalent-inorganic-cation-homeostasis:3	-1	-1	-1	-1	3	-1	-1	-1	-1
drug-transmembrane-transport:3	-1	3	3	-1	3	-1	-1	-1	-1
drug-transport:3	-1	3	3	-1	3	-1	-1	-1	-1
electron-transport-chain:3	-1	-1	-1	3	-1	-1	3	-1	-1
energy-coupled-proton-transport,-down-electrochemical-gradient:3	-1	-1	-1	3	-1	-1	-1	-1	-1
energy-derivation-by-oxidation-of-organic-compounds:3	-1	-1	-1	3	-1	-1	-1	-1	-1
ergosterol-biosynthetic-process:3	-1	-1	-1	-1	-1	3	3	-1	-1
ergosterol-metabolic-process:3	-1	-1	-1	-1	-1	3	3	-1	-1
establishment-of-localization:3	-1	-1	3	3	3	-1	-1	-1	-1
external-encapsulating-structure-organization:3	3	-1	-1	-1	3	-1	-1	-1	-1
fatty-acid-biosynthetic-process:3	-1	-1	-1	-1	-1	3	3	3	-1
fatty-acid-catabolic-process:3	-1	-1	-1	-1	-1	-1	-1	3	-1
fatty-acid-metabolic-process:3	-1	-1	-1	-1	-1	-1	3	3	-1
fatty-acid-oxidation:3	-1	-1	-1	-1	-1	-1	-1	3	-1
filamentous-growth-of-a-population-of-unicellular-organisms:3	-1	3	-1	-1	-1	-1	-1	-1	-1
flocculation:3	-1	3	-1	-1	-1	3	-1	-1	-1
flocculation-via-cell-wall-protein-carbohydrate-interaction:3	-1	3	-1	-1	-1	3	-1	-1	-1
fructose-metabolic-process:3	-1	-1	-1	-1	3	-1	-1	-1	-1
fungal-type-cell-wall-assembly:3	3	-1	-1	-1	-1	-1	-1	-1	-1
fungal-type-cell-wall-biogenesis:3	3	-1	-1	-1	-1	-1	-1	-1	-1
fungal-type-cell-wall-organization-or-biogenesis:3	3	-1	-1	-1	-1	-1	-1	-1	-1
galactose-metabolic-process:3	-1	-1	-1	-1	3	-1	-1	-1	-1
generation-of-precursor-metabolites-and-energy:3	-1	-1	-1	3	-1	-1	3	-1	-1
glucan-metabolic-process:3	-1	-1	-1	-1	3	-1	-1	-1	-1
glucose-transport:3	-1	-1	3	-1	3	3	-1	-1	-1
glutamine-family-amino-acid-biosynthetic-process:3	-1	-1	3	-1	3	3	3	-1	-1
glutamine-family-amino-acid-metabolic-process:3	-1	-1	-1	-1	3	-1	-1	-1	-1
glutamine-metabolic-process:3	-1	-1	-1	-1	-1	-1	3	-1	-1
growth-of-unicellular-organism-as-a-thread-of-attached-cells:3	-1	3	-1	-1	-1	-1	-1	-1	-1
heme-metabolic-process:3	-1	3	-1	-1	-1	-1	-1	-1	-1
hexose-transport:3	3	3	3	3	3	3	-1	-1	-1
inactivation-of-MAPK-activity:3	-1	-1	3	-1	3	-1	-1	-1	-1
inorganic-anion-transport:3	-1	-1	3	-1	3	-1	-1	-1	-1
ion-homeostasis:3	-1	-1	-1	-1	-1	-1	3	-1	-1
ion-transmembrane-transport:3	-1	-1	3	-1	3	-1	3	-1	-1
ion-transport:3	-1	3	3	-1	3	3	3	-1	-1
iron-assimilation:3	-1	-1	-1	-1	-1	3	-1	-1	-1
iron-ion-homeostasis:3	-1	3	3	-1	3	-1	3	-1	-1
iron-ion-transmembrane-transport:3	-1	-1	3	-1	3	-1	-1	-1	-1
iron-ion-transport:3	-1	3	-1	-1	-1	-1	3	-1	-1
lipid-catabolic-process:3	-1	-1	-1	-1	-1	-1	-1	3	-1
lipid-metabolic-process:3	-1	-1	-1	-1	-1	-1	3	3	-1
lipid-oxidation:3	-1	-1	-1	-1	-1	-1	-1	3	-1
localization:3	-1	-1	3	3	3	-1	-1	-1	-1
macromolecule-biosynthetic-process:3	-1	-1	-1	-1	-1	3	-1	-1	-1
maltose-metabolic-process:3	-1	-1	3	-1	3	-1	-1	3	-1
maturation-of-SSU-rRNA:3	-1	-1	-1	-1	-1	3	-1	-1	-1
maturation-of-SSU-rRNA-from-tricistronic-rRNA-transcript-(SSU-rRNA,-5.8S-rRNA,-LSU-rRNA):3	-1	-1	-1	-1	-1	3	-1	-1	-1
metal-ion-homeostasis:3	-1	-1	-1	-1	-1	-1	3	-1	-1
metal-ion-transport:3	-1	3	3	-1	3	-1	3	-1	-1
mitochondrial-ATP-synthesis-coupled-electron-transport:3	-1	-1	-1	3	-1	-1	-1	-1	-1
mitochondrion-organization:3	-1	-1	-1	3	-1	-1	-1	-1	-1
mitotic-sister-chromatid-cohesion:3	-1	-1	-1	-1	-1	-1	-1	3	-1
monocarboxylic-acid-catabolic-process:3	-1	-1	-1	-1	-1	-1	-1	3	-1
monocarboxylic-acid-metabolic-process:3	-1	-1	-1	-1	-1	3	3	3	-1
monosaccharide-transport:3	3	3	3	3	3	3	-1	-1	-1
multi-organism-process:3	-1	3	-1	-1	-1	-1	-1	-1	-1
negative-regulation-of-MAP-kinase-activity:3	-1	-1	3	-1	3	-1	-1	-1	-1
negative-regulation-of-MAPKKK-cascade:3	-1	-1	3	-1	3	-1	-1	-1	-1
negative-regulation-of-carbohydrate-metabolic-process:3	-1	-1	-1	-1	-1	-1	3	-1	-1
negative-regulation-of-cellular-carbohydrate-metabolic-process:3	-1	-1	-1	-1	-1	-1	3	-1	-1
negative-regulation-of-intracellular-protein-kinase-cascade:3	-1	-1	3	-1	3	-1	-1	-1	-1
negative-regulation-of-protein-kinase-activity:3	-1	-1	-1	-1	3	-1	-1	-1	-1
negative-regulation-of-protein-serine/threonine-kinase-activity:3	-1	-1	3	-1	3	-1	-1	-1	-1
negative-regulation-of-transcription-from-RNA-polymerase-II-promoter:3	-1	3	3	-1	3	-1	-1	-1	-1
nitrogen-compound-transport:3	3	3	3	-1	3	3	-1	-1	-1
nitrogen-utilization:3	-1	-1	3	-1	3	-1	-1	-1	-1
nucleobase-transport:3	-1	-1	3	-1	3	-1	-1	-1	-1
nucleosome-assembly:3	-1	-1	-1	-1	3	3	3	-1	-1
nucleosome-organization:3	-1	-1	-1	-1	-1	-1	3	-1	-1
oligopeptide-transport:3	-1	-1	-1	-1	-1	3	-1	-1	-1
oligosaccharide-catabolic-process:3	-1	-1	-1	-1	-1	-1	-1	3	-1
organic-acid-biosynthetic-process:3	-1	-1	-1	-1	3	3	3	3	-1
organic-acid-catabolic-process:3	-1	-1	-1	-1	-1	-1	-1	3	-1
organic-acid-metabolic-process:3	-1	-1	-1	-1	-1	3	3	3	3
organic-acid-transport:3	-1	-1	-1	-1	-1	3	-1	3	-1
organic-cation-transport:3	-1	-1	3	-1	3	3	-1	-1	-1
organic-substance-transport:3	3	3	3	3	3	3	-1	-1	-1
ornithine-metabolic-process:3	-1	3	3	-1	3	-1	-1	3	-1
oxidation-reduction-process:3	-1	-1	-1	3	-1	-1	3	3	-1
oxidative-phosphorylation:3	-1	-1	-1	3	-1	-1	-1	-1	-1
oxoacid-metabolic-process:3	-1	-1	-1	-1	-1	3	3	3	3
peptide-transport:3	-1	3	-1	-1	-1	-1	-1	-1	-1
pheromone-dependent-signal-transduction-involved-in-conjugation-with-cellular-fusion:3	-1	3	-1	-1	3	-1	-1	-1	-1
phosphatidylethanolamine-metabolic-process:3	-1	-1	-1	-1	-1	-1	-1	3	-1
phytosteroid-biosynthetic-process:3	-1	-1	-1	-1	-1	3	3	-1	-1
phytosteroid-metabolic-process:3	-1	-1	-1	-1	-1	3	3	-1	-1
polyamine-transport:3	-1	-1	-1	-1	3	-1	-1	-1	-1
polyol-transport:3	-1	-1	-1	-1	3	-1	-1	-1	-1
polysaccharide-metabolic-process:3	-1	-1	-1	-1	3	-1	-1	-1	-1
porphyrin-metabolic-process:3	-1	3	-1	-1	-1	-1	-1	-1	-1
positive-regulation-of-cell-cycle-process:3	-1	-1	-1	-1	-1	3	-1	-1	-1
positive-regulation-of-spindle-pole-body-separation:3	-1	-1	-1	-1	-1	3	-1	-1	-1
protein-complex-assembly:3	-1	-1	-1	3	-1	-1	-1	-1	-1
protein-complex-biogenesis:3	-1	-1	-1	3	-1	-1	-1	-1	-1
protein-complex-subunit-organization:3	-1	-1	-1	3	-1	-1	-1	-1	-1
rRNA-export-from-nucleus:3	-1	-1	-1	-1	-1	3	-1	-1	-1
rRNA-transport:3	-1	-1	-1	-1	-1	3	-1	-1	-1
regulation-of-MAP-kinase-activity:3	-1	-1	3	-1	3	-1	-1	-1	-1
regulation-of-carbohydrate-biosynthetic-process:3	-1	-1	-1	-1	3	-1	3	-1	-1
regulation-of-carbohydrate-catabolic-process:3	-1	-1	3	-1	3	-1	-1	-1	-1
regulation-of-carbohydrate-metabolic-process:3	-1	-1	3	-1	3	-1	3	-1	-1
regulation-of-cellular-carbohydrate-catabolic-process:3	-1	-1	3	-1	3	-1	-1	-1	-1
regulation-of-cellular-carbohydrate-metabolic-process:3	-1	-1	3	-1	3	-1	3	-1	-1
regulation-of-conjugation:3	-1	3	3	-1	3	-1	-1	-1	-1
regulation-of-conjugation-with-cellular-fusion:3	-1	3	3	-1	3	-1	-1	-1	-1
regulation-of-conjugation-with-cellular-fusion-by-signal-transduction:3	-1	3	-1	-1	3	-1	-1	-1	-1
regulation-of-cyclin-dependent-protein-kinase-activity:3	-1	-1	-1	-1	3	3	3	-1	-1
regulation-of-generation-of-precursor-metabolites-and-energy:3	-1	-1	3	-1	3	-1	3	-1	-1
regulation-of-glucan-biosynthetic-process:3	-1	-1	3	-1	3	-1	-1	-1	-1
regulation-of-glucose-metabolic-process:3	-1	-1	3	-1	3	-1	3	-1	-1
regulation-of-glycogen-biosynthetic-process:3	-1	-1	3	-1	3	-1	-1	-1	-1
regulation-of-glycogen-metabolic-process:3	-1	-1	3	-1	3	-1	-1	-1	-1
regulation-of-glycolysis:3	-1	-1	3	-1	3	-1	-1	-1	-1
regulation-of-kinase-activity:3	-1	-1	3	-1	3	3	3	-1	-1
regulation-of-multi-organism-process:3	-1	3	3	-1	3	-1	-1	-1	-1
regulation-of-phosphate-metabolic-process:3	-1	-1	-1	-1	3	-1	-1	-1	-1
regulation-of-phosphorus-metabolic-process:3	-1	-1	-1	-1	3	-1	-1	-1	-1
regulation-of-phosphorylation:3	-1	3	3	-1	3	-1	3	-1	-1
regulation-of-polysaccharide-biosynthetic-process:3	-1	-1	3	-1	3	-1	-1	-1	-1
regulation-of-polysaccharide-metabolic-process:3	-1	-1	3	-1	3	-1	-1	-1	-1
regulation-of-protein-kinase-activity:3	-1	3	3	-1	3	-1	-1	-1	-1
regulation-of-protein-phosphorylation:3	-1	3	3	-1	3	-1	-1	-1	-1
regulation-of-protein-serine/threonine-kinase-activity:3	-1	3	3	-1	3	3	3	-1	-1
regulation-of-spindle-pole-body-separation:3	-1	-1	-1	-1	-1	3	-1	-1	-1
regulation-of-transcription-by-glucose:3	-1	-1	-1	-1	3	-1	-1	-1	-1
regulation-of-transcription-from-RNA-polymerase-II-promoter:3	3	-1	3	-1	3	-1	-1	-1	-1
regulation-of-transferase-activity:3	-1	-1	3	-1	3	-1	3	-1	-1
reproduction:3	3	-1	-1	-1	-1	-1	-1	-1	-1
reproductive-process:3	3	3	-1	-1	-1	-1	-1	-1	-1
respiratory-electron-transport-chain:3	-1	-1	-1	3	-1	-1	-1	-1	-1
response-to-chemical-stimulus:3	-1	3	3	-1	3	-1	-1	-1	-1
response-to-drug:3	-1	3	3	-1	3	-1	-1	-1	-1
response-to-nutrient:3	-1	-1	3	-1	3	-1	-1	-1	-1
response-to-organic-substance:3	-1	3	-1	-1	-1	-1	-1	-1	-1
response-to-pheromone:3	-1	3	-1	-1	-1	-1	-1	-1	-1
response-to-pheromone-involved-in-conjugation-with-cellular-fusion:3	-1	3	-1	-1	-1	-1	-1	-1	-1
ribosomal-small-subunit-biogenesis:3	-1	-1	-1	-1	-1	3	-1	-1	-1
serine-family-amino-acid-biosynthetic-process:3	-1	-1	-1	-1	-1	-1	-1	3	-1
serine-family-amino-acid-metabolic-process:3	-1	-1	-1	-1	-1	-1	-1	3	-1
sexual-reproduction:3	3	3	-1	-1	-1	-1	-1	-1	-1
sexual-sporulation:3	3	-1	-1	-1	-1	-1	-1	-1	-1
sexual-sporulation-resulting-in-formation-of-a-cellular-spore:3	3	-1	-1	-1	-1	-1	-1	-1	-1
signal-transduction:3	-1	3	-1	-1	-1	-1	-1	-1	-1
signaling:3	-1	3	-1	-1	-1	-1	-1	-1	-1
small-molecule-biosynthetic-process:3	-1	-1	-1	-1	-1	3	3	3	3
small-molecule-metabolic-process:3	-1	-1	-1	3	3	-1	3	3	3
spore-wall-assembly:3	3	-1	-1	-1	-1	-1	-1	-1	-1
spore-wall-biogenesis:3	3	-1	-1	-1	-1	-1	-1	-1	-1
sporulation:3	3	-1	3	-1	3	-1	-1	-1	-1
sporulation-resulting-in-formation-of-a-cellular-spore:3	3	-1	3	-1	3	-1	-1	-1	-1
steroid-biosynthetic-process:3	-1	-1	-1	-1	-1	-1	3	-1	-1
steroid-metabolic-process:3	-1	-1	-1	-1	-1	3	3	-1	-1
sterol-biosynthetic-process:3	-1	-1	-1	-1	-1	-1	3	-1	-1
sterol-metabolic-process:3	-1	-1	-1	-1	-1	3	3	-1	-1
sulfur-amino-acid-biosynthetic-process:3	-1	-1	-1	-1	-1	-1	-1	3	-1
sulfur-amino-acid-metabolic-process:3	-1	-1	-1	-1	-1	-1	-1	3	-1
sulfur-compound-biosynthetic-process:3	-1	-1	-1	3	-1	3	-1	-1	-1
sulfur-compound-metabolic-process:3	-1	-1	-1	-1	-1	3	-1	-1	-1
sulfur-compound-transport:3	-1	-1	3	-1	-1	-1	-1	-1	-1
tetrapyrrole-metabolic-process:3	-1	3	-1	-1	-1	-1	-1	-1	-1
transition-metal-ion-transport:3	-1	3	3	-1	3	-1	3	-1	-1
translation:3	-1	-1	-1	-1	-1	3	-1	-1	-1
transmembrane-transport:3	-1	3	3	3	3	3	-1	-1	-1
transport:3	-1	-1	3	3	3	-1	-1	-1	-1
vitamin-transport:3	-1	-1	3	-1	3	-1	-1	-1	-1
zinc-ion-homeostasis:3	-1	3	3	-1	3	-1	-1	-1	-1
END	-2	-2	-2	-2	-2	-2	-2	-2	-2
'de-novo'-cotranslational-protein-folding:4	-1	-1	-1	-1	-1	-1	-1	4	-1
1,6-beta-glucan-biosynthetic-process:4	-1	-1	-1	-1	-1	-1	-1	4	-1
1,6-beta-glucan-metabolic-process:4	-1	-1	-1	-1	-1	-1	-1	4	-1
ATP-catabolic-process:4	-1	-1	-1	-1	4	-1	-1	-1	-1
ATP-dependent-chromatin-remodeling:4	-1	4	4	4	4	4	4	4	4
ATP-hydrolysis-coupled-proton-transport:4	-1	-1	-1	-1	-1	4	-1	-1	-1
ATP-synthesis-coupled-electron-transport:4	-1	-1	-1	-1	-1	-1	-1	4	-1
COPII-coated-vesicle-budding:4	4	-1	-1	-1	-1	-1	-1	-1	-1
DNA-conformation-change:4	-1	-1	-1	4	4	-1	4	-1	4
DNA-damage-checkpoint:4	4	-1	-1	-1	-1	-1	-1	-1	-1
DNA-dependent-DNA-replication:4	-1	-1	4	4	4	-1	4	-1	4
DNA-dependent-DNA-replication-initiation:4	-1	-1	-1	4	4	-1	-1	-1	-1
DNA-dependent-transcriptional-preinitiation-complex-assembly:4	4	-1	-1	-1	4	4	4	-1	4
DNA-integrity-checkpoint:4	4	-1	-1	-1	4	-1	4	-1	4
DNA-metabolic-process:4	4	4	4	4	4	4	4	4	4
DNA-packaging:4	-1	-1	-1	4	4	-1	4	-1	-1
DNA-recombination:4	4	-1	4	4	4	-1	4	-1	4
DNA-repair:4	4	4	4	4	4	4	4	4	4
DNA-replication:4	-1	-1	4	4	4	-1	4	-1	4
DNA-replication-independent-nucleosome-organization:4	-1	4	-1	-1	-1	-1	-1	-1	-1
DNA-strand-elongation:4	-1	-1	-1	4	4	-1	-1	-1	-1
DNA-strand-elongation-involved-in-DNA-replication:4	-1	-1	-1	4	4	-1	-1	-1	-1
ER-to-Golgi-vesicle-mediated-transport:4	4	4	4	-1	4	4	4	-1	4
G-protein-coupled-receptor-protein-signaling-pathway:4	-1	-1	-1	-1	-1	-1	4	-1	4
G2/M-transition-of-mitotic-cell-cycle:4	-1	-1	4	4	4	-1	4	-1	4
GPI-anchor-biosynthetic-process:4	-1	-1	4	4	-1	-1	-1	4	-1
GPI-anchor-metabolic-process:4	-1	-1	-1	4	-1	-1	-1	4	-1
Golgi-organization:4	-1	4	-1	-1	-1	-1	-1	-1	-1
Golgi-to-endosome-transport:4	-1	-1	-1	-1	-1	4	-1	-1	4
Golgi-to-plasma-membrane-protein-transport:4	4	-1	-1	-1	-1	-1	-1	-1	-1
Golgi-to-plasma-membrane-transport:4	4	-1	4	-1	4	4	4	-1	4
Golgi-to-vacuole-transport:4	4	-1	-1	-1	-1	4	4	-1	4
Golgi-vesicle-transport:4	4	4	4	4	4	4	4	-1	4
L-methionine-salvage:4	-1	-1	-1	-1	-1	-1	-1	4	-1
L-methionine-salvage-from-methylthioadenosine:4	-1	-1	-1	-1	-1	-1	-1	4	-1
M-phase:4	-1	4	4	4	4	-1	4	4	4
M-phase-of-meiotic-cell-cycle:4	-1	4	-1	-1	4	-1	-1	-1	4
M-phase-of-mitotic-cell-cycle:4	4	4	4	4	4	4	4	-1	4
NLS-bearing-substrate-import-into-nucleus:4	-1	-1	-1	-1	-1	-1	-1	4	-1
RNA-3'-end-processing:4	-1	-1	-1	4	-1	-1	-1	-1	-1
RNA-biosynthetic-process:4	4	4	4	4	4	4	4	4	4
RNA-catabolic-process:4	-1	-1	-1	4	-1	-1	-1	-1	-1
RNA-export-from-nucleus:4	-1	4	-1	4	-1	-1	-1	4	-1
RNA-localization:4	-1	4	-1	4	-1	-1	-1	4	-1
RNA-metabolic-process:4	-1	-1	-1	4	-1	-1	-1	4	-1
RNA-polyadenylation:4	-1	4	-1	-1	-1	-1	-1	-1	-1
RNA-polymerase-II-transcriptional-preinitiation-complex-assembly:4	-1	-1	-1	-1	4	4	4	-1	4
RNA-splicing:4	4	-1	4	4	4	-1	4	4	4
RNA-splicing,-via-transesterification-reactions:4	4	-1	4	4	4	-1	4	4	4
RNA-splicing,-via-transesterification-reactions-with-bulged-adenosine-as-nucleophile:4	4	-1	4	4	4	-1	4	4	4
RNA-transport:4	-1	4	-1	4	-1	-1	-1	4	-1
Rho-protein-signal-transduction:4	-1	-1	-1	-1	-1	-1	-1	4	-1
S-phase:4	-1	-1	-1	4	-1	-1	-1	-1	-1
S-phase-of-mitotic-cell-cycle:4	-1	-1	-1	4	-1	-1	-1	-1	-1
TOR-signaling-cascade:4	-1	4	-1	-1	-1	-1	-1	-1	-1
acetyl-CoA-catabolic-process:4	-1	-1	-1	-1	-1	-1	-1	4	-1
acetyl-CoA-metabolic-process:4	-1	-1	-1	-1	-1	-1	-1	4	-1
actin-cortical-patch-localization:4	-1	-1	-1	-1	-1	-1	4	-1	-1
actin-cytoskeleton-organization:4	-1	-1	-1	-1	-1	-1	4	-1	4
actin-filament-based-process:4	-1	-1	-1	-1	-1	-1	4	-1	4
actin-filament-bundle-assembly:4	-1	-1	-1	-1	4	-1	-1	-1	-1
actin-filament-organization:4	-1	-1	-1	-1	-1	-1	4	-1	4
adaptation-of-signaling-pathway:4	-1	-1	-1	-1	-1	-1	4	-1	4
adaptation-of-signaling-pathway-by-response-to-pheromone-involved-in-conjugation-with-cellular-fusion:4	-1	-1	-1	-1	-1	-1	4	-1	4
amino-acid-activation:4	-1	-1	-1	-1	-1	-1	-1	4	-1
amino-acid-catabolic-process-to-alcohol-via-Ehrlich-pathway:4	-1	-1	4	-1	4	-1	-1	-1	-1
amino-acid-catabolic-process-via-Ehrlich-pathway:4	-1	-1	4	-1	4	-1	-1	-1	-1
amino-acid-salvage:4	-1	-1	-1	-1	-1	-1	-1	4	-1
aminoglycan-biosynthetic-process:4	-1	-1	-1	-1	-1	-1	4	-1	4
anaphase-promoting-complex-dependent-proteasomal-ubiquitin-dependent-protein-catabolic-process:4	4	-1	-1	-1	-1	-1	4	-1	4
anatomical-structure-development:4	-1	-1	-1	-1	4	-1	-1	-1	-1
anatomical-structure-homeostasis:4	-1	-1	4	-1	4	-1	-1	-1	-1
anatomical-structure-morphogenesis:4	-1	-1	-1	-1	4	-1	-1	-1	-1
asexual-reproduction:4	4	-1	4	-1	4	-1	4	-1	4
attachment-of-GPI-anchor-to-protein:4	-1	-1	-1	-1	-1	-1	-1	4	-1
axial-cellular-bud-site-selection:4	-1	-1	-1	-1	4	-1	-1	-1	-1
beta-glucan-metabolic-process:4	-1	-1	-1	-1	-1	-1	-1	4	-1
biological-regulation:4	4	4	4	4	4	4	4	4	4
biosynthetic-process:4	4	4	-1	4	-1	-1	-1	-1	-1
bipolar-cellular-bud-site-selection:4	4	-1	-1	-1	-1	-1	4	-1	4
budding-cell-apical-bud-growth:4	-1	4	4	4	4	-1	4	-1	4
budding-cell-bud-growth:4	-1	4	4	4	4	-1	4	-1	4
budding-cell-isotropic-bud-growth:4	-1	-1	-1	-1	4	-1	4	-1	4
cAMP-mediated-signaling:4	-1	-1	-1	4	-1	-1	-1	-1	-1
carbohydrate-transport:4	-1	-1	-1	-1	-1	4	-1	-1	4
cation-homeostasis:4	4	-1	-1	-1	-1	-1	-1	-1	-1
cell-budding:4	4	-1	4	-1	4	-1	4	-1	4
cell-cycle:4	4	4	4	4	4	4	4	4	4
cell-cycle-checkpoint:4	4	-1	4	4	4	4	4	-1	4
cell-cycle-cytokinesis:4	-1	-1	-1	-1	-1	-1	4	-1	4
cell-cycle-phase:4	4	4	4	4	4	4	4	4	4
cell-cycle-process:4	4	4	4	4	4	4	4	-1	4
cell-division:4	4	4	4	4	4	4	4	-1	4
cell-growth:4	-1	-1	-1	-1	-1	-1	4	-1	4
cell-morphogenesis:4	4	4	4	4	4	-1	-1	-1	-1
cell-morphogenesis-involved-in-conjugation:4	4	4	4	-1	4	-1	-1	-1	-1
cell-morphogenesis-involved-in-conjugation-with-cellular-fusion:4	4	4	-1	-1	4	-1	-1	-1	-1
cell-shape-checkpoint:4	-1	-1	-1	-1	4	-1	-1	-1	-1
cell-surface-receptor-linked-signaling-pathway:4	-1	-1	-1	-1	-1	-1	4	-1	4
cell-wall-biogenesis:4	-1	-1	-1	-1	-1	-1	4	-1	4
cell-wall-macromolecule-biosynthetic-process:4	-1	-1	-1	-1	4	-1	-1	-1	-1
cell-wall-macromolecule-metabolic-process:4	-1	-1	-1	-1	4	-1	-1	-1	-1
cell-wall-organization-or-biogenesis:4	-1	-1	-1	-1	-1	-1	4	-1	4
cellular-biosynthetic-process:4	4	4	-1	4	-1	-1	-1	4	-1
cellular-bud-site-selection:4	-1	-1	-1	-1	-1	-1	4	-1	4
cellular-cation-homeostasis:4	4	-1	-1	-1	-1	-1	-1	-1	-1
cellular-cell-wall-macromolecule-metabolic-process:4	-1	-1	-1	-1	4	-1	-1	-1	-1
cellular-cell-wall-organization-or-biogenesis:4	-1	-1	-1	-1	-1	-1	4	-1	4
cellular-chemical-homeostasis:4	4	-1	-1	-1	-1	-1	4	-1	-1
cellular-component-disassembly:4	-1	-1	-1	4	4	4	4	-1	-1
cellular-component-disassembly-at-cellular-level:4	-1	-1	-1	4	4	4	4	-1	-1
cellular-component-macromolecule-biosynthetic-process:4	-1	-1	-1	-1	4	-1	-1	-1	-1
cellular-component-morphogenesis:4	-1	4	-1	-1	4	-1	-1	-1	-1
cellular-component-organization:4	4	4	4	4	4	4	4	4	4
cellular-component-organization-at-cellular-level:4	4	4	4	4	4	4	4	4	4
cellular-component-organization-or-biogenesis:4	4	4	4	4	4	-1	-1	4	-1
cellular-component-organization-or-biogenesis-at-cellular-level:4	4	4	4	4	4	-1	-1	-1	-1
cellular-developmental-process:4	-1	-1	-1	-1	4	-1	-1	-1	-1
cellular-ion-homeostasis:4	4	-1	-1	-1	-1	-1	-1	-1	-1
cellular-lipid-metabolic-process:4	-1	-1	-1	-1	-1	-1	-1	4	-1
cellular-localization:4	4	4	4	4	4	4	4	-1	4
cellular-macromolecular-complex-disassembly:4	-1	-1	-1	4	4	4	4	-1	4
cellular-macromolecular-complex-subunit-organization:4	-1	4	-1	4	4	4	4	4	-1
cellular-macromolecule-biosynthetic-process:4	4	4	4	4	4	-1	-1	-1	-1
cellular-macromolecule-localization:4	4	4	4	-1	4	4	4	4	4
cellular-macromolecule-metabolic-process:4	-1	4	4	4	-1	-1	-1	-1	-1
cellular-manganese-ion-homeostasis:4	4	-1	-1	-1	-1	-1	-1	-1	-1
cellular-membrane-fusion:4	4	-1	-1	-1	-1	4	4	-1	4
cellular-membrane-organization:4	4	-1	4	-1	-1	4	4	-1	4
cellular-monovalent-inorganic-cation-homeostasis:4	-1	-1	4	-1	4	-1	4	-1	-1
cellular-nitrogen-compound-metabolic-process:4	-1	-1	-1	4	-1	-1	-1	4	-1
cellular-oligosaccharide-metabolic-process:4	-1	-1	-1	-1	-1	-1	-1	4	-1
cellular-process:4	4	4	4	4	-1	4	-1	4	-1
cellular-process-involved-in-reproduction:4	-1	-1	-1	-1	4	-1	4	-1	4
cellular-protein-localization:4	4	4	4	-1	4	4	4	4	4
cellular-protein-metabolic-process:4	4	4	-1	-1	-1	-1	-1	-1	-1
cellular-respiration:4	-1	-1	-1	-1	-1	-1	-1	4	-1
cellular-response-to-heat:4	-1	-1	-1	4	-1	-1	-1	-1	-1
cellular-response-to-organic-substance:4	-1	-1	4	-1	4	-1	-1	-1	-1
cellular-response-to-stimulus:4	4	4	4	4	4	-1	4	-1	4
cellular-response-to-stress:4	-1	-1	4	4	4	-1	4	-1	4
chitin-biosynthetic-process:4	-1	-1	-1	-1	-1	-1	4	-1	4
chromatin-assembly-or-disassembly:4	-1	4	4	4	4	-1	4	4	4
chromatin-disassembly:4	-1	4	4	4	4	4	4	4	4
chromatin-modification:4	4	4	4	4	4	4	4	4	4
chromatin-organization:4	4	4	4	4	4	4	4	4	4
chromatin-remodeling:4	-1	4	4	4	4	4	4	4	4
chromatin-silencing:4	-1	-1	4	4	4	-1	-1	4	-1
chromatin-silencing-at-silent-mating-type-cassette:4	-1	-1	-1	4	4	-1	-1	4	-1
chromatin-silencing-at-telomere:4	-1	4	-1	4	-1	-1	-1	-1	-1
chromosome-condensation:4	-1	-1	-1	4	4	-1	-1	-1	-1
chromosome-organization:4	4	4	4	4	4	4	4	4	4
chromosome-segregation:4	-1	4	4	4	4	4	4	-1	4
coenzyme-catabolic-process:4	-1	-1	-1	-1	-1	-1	-1	4	-1
coenzyme-transport:4	-1	-1	4	-1	-1	-1	-1	-1	-1
cofactor-catabolic-process:4	-1	-1	-1	-1	-1	-1	-1	4	-1
conjugation:4	-1	4	-1	4	4	-1	4	-1	4
conjugation-with-cellular-fusion:4	-1	4	-1	4	4	-1	4	-1	4
covalent-chromatin-modification:4	4	4	4	4	4	4	4	4	4
cyclic-nucleotide-mediated-signaling:4	-1	-1	-1	4	-1	-1	-1	-1	-1
cyclin-catabolic-process:4	4	-1	-1	-1	-1	-1	4	-1	4
cytokinesis,-site-selection:4	-1	-1	-1	-1	-1	-1	4	-1	4
cytokinetic-process:4	-1	-1	-1	-1	-1	-1	4	-1	-1
cytoplasmic-mRNA-processing-body-assembly:4	-1	-1	-1	-1	4	-1	-1	-1	-1
cytoskeleton-dependent-intracellular-transport:4	-1	-1	-1	-1	4	-1	-1	4	-1
cytoskeleton-organization:4	-1	-1	-1	-1	4	-1	4	-1	4
dephosphorylation:4	-1	-1	4	-1	-1	-1	4	-1	4
developmental-process:4	-1	-1	-1	-1	4	-1	-1	-1	-1
developmental-process-involved-in-reproduction:4	-1	-1	-1	-1	-1	-1	-1	-1	4
double-strand-break-repair:4	-1	-1	4	4	4	-1	4	-1	4
double-strand-break-repair-via-break-induced-replication:4	-1	-1	-1	4	4	-1	-1	-1	4
double-strand-break-repair-via-homologous-recombination:4	-1	-1	-1	4	4	-1	4	-1	4
electron-transport-chain:4	-1	-1	-1	-1	-1	-1	-1	4	-1
endocytosis:4	-1	-1	-1	-1	-1	4	4	4	4
endosome-transport:4	4	-1	-1	-1	4	4	4	-1	4
endosome-transport-via-multivesicular-body-sorting-pathway:4	-1	-1	-1	-1	-1	-1	4	-1	4
energy-coupled-proton-transport,-against-electrochemical-gradient:4	-1	-1	-1	-1	-1	4	-1	-1	-1
establishment-of-RNA-localization:4	-1	4	-1	4	-1	-1	-1	4	-1
establishment-of-cell-polarity:4	4	-1	4	-1	4	-1	4	-1	4
establishment-of-localization:4	4	4	4	-1	4	4	4	-1	4
establishment-of-localization-in-cell:4	4	4	4	4	4	4	4	-1	4
establishment-of-nucleus-localization:4	-1	-1	-1	-1	4	-1	-1	4	-1
establishment-of-protein-localization:4	4	4	4	4	4	4	4	-1	4
establishment-of-protein-localization-to-organelle:4	4	-1	-1	-1	-1	-1	-1	-1	4
establishment-of-protein-localization-to-vacuole:4	-1	-1	-1	-1	-1	-1	4	-1	4
establishment-or-maintenance-of-actin-cytoskeleton-polarity:4	-1	4	-1	-1	4	-1	-1	-1	-1
establishment-or-maintenance-of-cell-polarity:4	4	-1	4	-1	4	-1	4	-1	4
establishment-or-maintenance-of-cytoskeleton-polarity:4	-1	4	-1	-1	4	-1	-1	-1	-1
exocytosis:4	4	-1	4	-1	4	4	4	-1	4
filamentous-growth:4	-1	-1	-1	-1	-1	-1	4	-1	4
filamentous-growth-of-a-population-of-unicellular-organisms:4	-1	-1	-1	-1	-1	-1	4	-1	4
flocculation:4	-1	-1	-1	-1	4	4	-1	-1	-1
flocculation-via-cell-wall-protein-carbohydrate-interaction:4	-1	-1	-1	-1	4	4	-1	-1	-1
fungal-type-cell-wall-organization-or-biogenesis:4	-1	-1	-1	-1	-1	-1	-1	-1	4
gene-expression:4	-1	-1	-1	4	-1	-1	-1	-1	-1
gene-silencing:4	-1	-1	4	4	4	-1	-1	4	-1
generation-of-catalytic-spliceosome-for-first-transesterification-step:4	4	-1	-1	-1	4	-1	4	4	4
generation-of-catalytic-spliceosome-for-second-transesterification-step:4	-1	-1	-1	-1	4	-1	-1	-1	-1
glycerolipid-biosynthetic-process:4	4	-1	4	-1	4	-1	-1	4	-1
glycerolipid-metabolic-process:4	-1	-1	-1	4	-1	-1	-1	4	-1
glycerophospholipid-biosynthetic-process:4	4	-1	4	-1	-1	-1	-1	4	-1
glycerophospholipid-metabolic-process:4	-1	-1	-1	-1	-1	-1	-1	4	-1
glycoprotein-biosynthetic-process:4	4	4	4	4	4	4	4	4	4
glycoprotein-metabolic-process:4	4	4	4	4	4	4	4	4	4
glycosylation:4	4	4	4	4	4	4	4	4	4
growth:4	-1	-1	4	-1	4	-1	4	-1	4
growth-of-unicellular-organism-as-a-thread-of-attached-cells:4	-1	-1	-1	-1	-1	-1	4	-1	4
hexose-transport:4	-1	-1	-1	-1	-1	4	-1	-1	4
histone-acetylation:4	-1	4	4	-1	4	4	4	4	4
histone-deacetylation:4	4	4	4	-1	4	-1	4	-1	4
histone-exchange:4	-1	4	4	-1	-1	-1	4	-1	-1
histone-lysine-methylation:4	-1	-1	-1	4	-1	-1	-1	-1	-1
histone-methylation:4	-1	-1	-1	4	4	4	-1	4	-1
histone-modification:4	4	4	4	4	4	4	4	4	4
homeostatic-process:4	-1	-1	4	-1	4	-1	-1	-1	-1
homologous-chromosome-segregation:4	4	-1	4	-1	4	-1	-1	-1	-1
hydrogen-transport:4	-1	-1	-1	-1	-1	4	-1	-1	-1
indolalkylamine-biosynthetic-process:4	4	-1	-1	-1	-1	-1	-1	-1	-1
indole-containing-compound-biosynthetic-process:4	4	-1	-1	-1	-1	-1	-1	-1	-1
internal-peptidyl-lysine-acetylation:4	-1	4	4	-1	4	4	4	4	4
internal-protein-amino-acid-acetylation:4	-1	4	4	-1	4	4	4	4	4
interphase:4	-1	-1	4	4	-1	4	-1	-1	-1
interphase-of-mitotic-cell-cycle:4	-1	-1	4	4	4	4	-1	-1	-1
intra-Golgi-vesicle-mediated-transport:4	4	4	4	-1	4	-1	4	-1	4
intra-S-DNA-damage-checkpoint:4	-1	-1	-1	4	-1	-1	-1	-1	-1
intracellular-pH-reduction:4	-1	-1	-1	-1	4	-1	4	-1	-1
intracellular-protein-transport:4	4	4	4	-1	4	-1	4	-1	4
intracellular-signal-transduction:4	4	4	4	-1	4	-1	4	-1	4
intracellular-transport:4	4	4	4	4	4	4	4	-1	4
invasive-growth-in-response-to-glucose-limitation:4	-1	-1	-1	-1	-1	-1	4	-1	4
ion-homeostasis:4	4	-1	-1	-1	-1	-1	-1	-1	-1
late-endosome-to-vacuole-transport:4	4	-1	-1	-1	-1	-1	4	-1	4
late-endosome-to-vacuole-transport-via-multivesicular-body-sorting-pathway:4	-1	-1	-1	-1	-1	-1	4	-1	4
lipid-biosynthetic-process:4	-1	-1	4	-1	-1	-1	-1	4	-1
lipid-localization:4	-1	-1	4	-1	4	-1	-1	-1	-1
lipid-phosphorylation:4	-1	-1	-1	-1	-1	-1	-1	-1	4
lipid-translocation:4	-1	-1	4	4	-1	-1	-1	-1	-1
lipid-transport:4	-1	-1	4	-1	4	-1	-1	-1	-1
lipoprotein-biosynthetic-process:4	-1	-1	-1	4	-1	-1	-1	4	-1
lipoprotein-metabolic-process:4	-1	-1	-1	4	-1	-1	-1	4	-1
localization:4	4	4	4	-1	4	4	4	-1	4
localization-within-membrane:4	-1	-1	4	-1	-1	-1	-1	4	-1
loss-of-chromatin-silencing:4	-1	-1	-1	4	-1	-1	-1	4	-1
loss-of-chromatin-silencing-involved-in-replicative-cell-aging:4	-1	-1	-1	4	4	-1	-1	-1	-1
mRNA-3'-end-processing:4	4	4	4	4	4	4	4	4	4
mRNA-catabolic-process:4	-1	-1	-1	4	-1	-1	-1	-1	-1
mRNA-export-from-nucleus:4	4	-1	-1	4	4	4	-1	4	-1
mRNA-export-from-nucleus-in-response-to-heat-stress:4	-1	-1	-1	4	-1	-1	-1	4	-1
mRNA-metabolic-process:4	4	-1	4	4	4	4	4	4	4
mRNA-polyadenylation:4	-1	4	-1	-1	-1	-1	-1	4	-1
mRNA-processing:4	4	-1	4	4	4	4	4	4	4
mRNA-transport:4	-1	-1	-1	4	4	-1	-1	4	-1
macromolecular-complex-disassembly:4	-1	-1	-1	4	4	4	4	-1	4
macromolecular-complex-subunit-organization:4	-1	4	-1	4	4	4	4	4	4
macromolecule-biosynthetic-process:4	4	4	4	4	4	-1	-1	-1	-1
macromolecule-glycosylation:4	4	4	4	4	4	4	4	4	4
macromolecule-localization:4	4	4	4	4	4	4	4	-1	4
macromolecule-metabolic-process:4	-1	4	4	4	-1	-1	-1	-1	-1
macromolecule-modification:4	4	4	4	4	4	4	4	4	4
maintenance-of-cell-polarity:4	-1	-1	4	-1	4	-1	4	-1	4
maintenance-of-fidelity-involved-in-DNA-dependent-DNA-replication:4	-1	-1	-1	4	4	-1	4	-1	-1
maintenance-of-location-in-cell:4	-1	-1	-1	-1	-1	-1	4	-1	-1
maintenance-of-protein-location-in-cell:4	-1	-1	-1	-1	-1	-1	4	-1	-1
maltose-metabolic-process:4	-1	-1	-1	-1	-1	-1	-1	-1	4
manganese-ion-homeostasis:4	4	-1	-1	-1	-1	-1	-1	-1	-1
manganese-ion-transport:4	4	-1	-1	-1	-1	-1	-1	-1	-1
meiosis:4	-1	4	-1	-1	4	-1	-1	-1	4
meiotic-cell-cycle:4	-1	4	-1	-1	4	-1	4	-1	4
meiotic-chromosome-segregation:4	-1	-1	4	-1	4	-1	-1	-1	-1
membrane-budding:4	4	-1	-1	-1	-1	-1	4	-1	4
membrane-docking:4	4	-1	-1	-1	-1	4	4	-1	4
membrane-fusion:4	4	-1	-1	-1	-1	4	4	-1	4
membrane-invagination:4	-1	-1	-1	-1	-1	-1	4	-1	4
membrane-organization:4	4	-1	4	-1	-1	4	4	-1	4
microtubule-based-movement:4	-1	-1	-1	-1	4	-1	-1	-1	-1
microtubule-based-process:4	-1	-1	4	4	4	4	4	4	4
microtubule-based-transport:4	-1	-1	-1	-1	4	-1	-1	4	-1
microtubule-cytoskeleton-organization:4	-1	-1	-1	4	4	-1	4	-1	4
microtubule-nucleation:4	-1	-1	-1	4	-1	4	-1	-1	-1
microtubule-organizing-center-organization:4	-1	-1	-1	4	-1	-1	-1	-1	-1
mismatch-repair:4	-1	-1	-1	4	-1	-1	-1	-1	-1
mitochondrial-ATP-synthesis-coupled-electron-transport:4	-1	-1	-1	-1	-1	-1	-1	4	-1
mitochondrial-electron-transport,-succinate-to-ubiquinone:4	-1	-1	-1	-1	-1	-1	-1	4	-1
mitochondrial-electron-transport,-ubiquinol-to-cytochrome-c:4	-1	-1	-1	-1	-1	-1	4	-1	-1
mitochondrial-membrane-organization:4	4	-1	-1	-1	-1	-1	-1	-1	-1
mitochondrial-proton-transporting-ATP-synthase-complex-assembly:4	4	-1	-1	-1	-1	-1	-1	-1	-1
mitochondrial-respiratory-chain-complex-III-assembly:4	-1	-1	-1	-1	-1	-1	-1	4	-1
mitochondrial-respiratory-chain-complex-III-biogenesis:4	-1	-1	-1	-1	-1	-1	-1	4	-1
mitochondrial-respiratory-chain-complex-assembly:4	-1	-1	-1	-1	-1	-1	-1	4	-1
mitochondrial-translation:4	4	-1	-1	-1	-1	-1	-1	-1	-1
mitochondrion-distribution:4	-1	-1	-1	-1	-1	-1	4	-1	4
mitochondrion-inheritance:4	-1	-1	-1	-1	-1	-1	4	-1	4
mitochondrion-localization:4	-1	-1	-1	-1	-1	-1	4	-1	4
mitochondrion-organization:4	4	-1	-1	-1	-1	-1	-1	-1	-1
mitosis:4	4	4	4	4	4	4	4	-1	4
mitotic-cell-cycle:4	4	4	4	4	4	4	4	4	4
mitotic-cell-cycle-checkpoint:4	4	-1	4	-1	4	4	4	-1	4
mitotic-cell-cycle-spindle-assembly-checkpoint:4	-1	-1	4	-1	4	4	4	-1	4
mitotic-cell-cycle-spindle-checkpoint:4	-1	-1	4	-1	4	4	4	-1	4
mitotic-chromosome-condensation:4	-1	-1	-1	4	-1	-1	-1	-1	-1
mitotic-metaphase/anaphase-transition:4	4	-1	-1	-1	-1	-1	-1	-1	-1
mitotic-recombination:4	4	-1	4	-1	4	-1	4	-1	4
mitotic-sister-chromatid-cohesion:4	-1	-1	-1	4	4	-1	4	-1	-1
mitotic-sister-chromatid-segregation:4	-1	-1	4	4	4	-1	4	-1	4
mitotic-spindle-elongation:4	-1	-1	-1	-1	4	-1	-1	-1	-1
mitotic-spindle-organization:4	-1	-1	-1	-1	4	-1	4	-1	4
mitotic-spindle-organization-in-nucleus:4	-1	-1	-1	-1	4	-1	-1	4	-1
monosaccharide-transport:4	-1	-1	-1	-1	-1	4	-1	-1	4
monovalent-inorganic-cation-homeostasis:4	-1	-1	4	-1	4	-1	4	-1	4
multi-organism-process:4	-1	4	-1	4	4	-1	4	-1	4
negative-regulation-of-DNA-metabolic-process:4	-1	-1	-1	4	4	-1	-1	-1	-1
negative-regulation-of-DNA-recombination:4	-1	-1	-1	4	-1	-1	-1	-1	-1
negative-regulation-of-RNA-metabolic-process:4	-1	4	4	4	4	-1	-1	4	-1
negative-regulation-of-Ras-protein-signal-transduction:4	-1	4	4	-1	4	-1	-1	-1	-1
negative-regulation-of-biological-process:4	-1	4	4	4	4	-1	4	4	4
negative-regulation-of-biosynthetic-process:4	-1	4	4	4	4	-1	-1	4	-1
negative-regulation-of-cell-cycle:4	-1	-1	-1	-1	4	4	4	-1	4
negative-regulation-of-cell-cycle-process:4	-1	4	4	4	4	4	4	-1	4
negative-regulation-of-cellular-biosynthetic-process:4	-1	4	4	4	4	-1	-1	4	-1
negative-regulation-of-cellular-component-organization:4	-1	-1	-1	-1	4	-1	4	-1	-1
negative-regulation-of-cellular-macromolecule-biosynthetic-process:4	-1	4	4	4	4	-1	-1	4	-1
negative-regulation-of-cellular-metabolic-process:4	-1	4	4	4	4	-1	-1	-1	-1
negative-regulation-of-cellular-process:4	-1	4	4	4	4	4	4	4	4
negative-regulation-of-chromatin-silencing:4	-1	-1	-1	-1	4	-1	-1	-1	-1
negative-regulation-of-chromatin-silencing-at-telomere:4	4	4	4	-1	4	-1	-1	-1	-1
negative-regulation-of-gene-expression:4	-1	4	4	4	4	-1	-1	4	-1
negative-regulation-of-gene-expression,-epigenetic:4	-1	-1	4	4	4	-1	-1	4	-1
negative-regulation-of-gene-silencing:4	-1	-1	-1	-1	4	-1	-1	-1	-1
negative-regulation-of-macromolecule-biosynthetic-process:4	-1	4	4	4	4	-1	-1	4	-1
negative-regulation-of-macromolecule-metabolic-process:4	-1	4	4	4	4	-1	-1	4	-1
negative-regulation-of-metabolic-process:4	-1	4	4	4	4	-1	-1	-1	-1
negative-regulation-of-mitosis:4	-1	-1	4	-1	4	4	4	-1	4
negative-regulation-of-mitotic-metaphase/anaphase-transition:4	-1	-1	4	-1	4	4	4	-1	4
negative-regulation-of-nitrogen-compound-metabolic-process:4	-1	4	4	4	4	-1	-1	4	-1
negative-regulation-of-nuclear-division:4	-1	-1	4	-1	4	4	4	-1	4
negative-regulation-of-nucleobase,-nucleoside,-nucleotide-and-nucleic-acid-metabolic-process:4	-1	4	4	4	4	-1	-1	4	-1
negative-regulation-of-organelle-organization:4	-1	-1	-1	-1	4	-1	4	-1	4
negative-regulation-of-signal-transduction:4	-1	-1	-1	-1	-1	-1	4	-1	-1
negative-regulation-of-signaling:4	-1	-1	-1	-1	-1	-1	4	-1	-1
negative-regulation-of-small-GTPase-mediated-signal-transduction:4	-1	4	4	-1	4	-1	-1	-1	-1
negative-regulation-of-transcription,-DNA-dependent:4	-1	4	4	4	4	-1	-1	4	-1
negative-regulation-of-transcription-from-RNA-polymerase-I-promoter:4	-1	-1	4	-1	-1	-1	-1	-1	-1
negative-regulation-of-transcription-from-RNA-polymerase-II-promoter:4	-1	-1	-1	4	-1	-1	-1	-1	-1
nitrogen-compound-metabolic-process:4	-1	-1	-1	4	-1	-1	-1	4	-1
nuclear-division:4	4	4	4	4	4	4	4	-1	4
nuclear-export:4	-1	-1	-1	4	-1	-1	-1	4	-1
nuclear-import:4	-1	-1	-1	4	-1	-1	-1	4	-1
nuclear-mRNA-splicing,-via-spliceosome:4	4	-1	4	4	4	-1	4	4	4
nuclear-migration:4	-1	-1	-1	-1	4	-1	-1	4	-1
nuclear-migration-along-microtubule:4	-1	-1	-1	-1	4	-1	-1	4	-1
nuclear-migration-involved-in-conjugation-with-cellular-fusion:4	-1	-1	-1	-1	4	-1	-1	4	-1
nuclear-pore-organization:4	-1	-1	-1	4	-1	-1	-1	4	-1
nuclear-transcribed-mRNA-catabolic-process:4	-1	-1	-1	4	-1	-1	-1	-1	-1
nuclear-transcribed-mRNA-catabolic-process,-deadenylation-dependent-decay:4	-1	-1	-1	4	-1	-1	-1	-1	-1
nuclear-transcribed-mRNA-poly(A)-tail-shortening:4	4	-1	4	-1	4	-1	-1	-1	-1
nuclear-transport:4	-1	-1	-1	4	-1	-1	-1	4	-1
nucleic-acid-metabolic-process:4	-1	-1	4	4	4	-1	-1	4	-1
nucleic-acid-transport:4	-1	4	-1	4	-1	-1	-1	4	-1
nucleobase,-nucleoside,-nucleotide-and-nucleic-acid-metabolic-process:4	-1	-1	4	4	4	-1	-1	4	-1
nucleobase,-nucleoside,-nucleotide-and-nucleic-acid-transport:4	-1	4	-1	4	-1	-1	-1	4	-1
nucleobase-transport:4	-1	-1	-1	-1	-1	-1	4	-1	4
nucleocytoplasmic-transport:4	-1	-1	-1	4	-1	-1	-1	4	-1
nucleoside-triphosphate-catabolic-process:4	-1	-1	-1	-1	4	-1	-1	-1	-1
nucleosome-disassembly:4	-1	4	4	4	4	4	4	4	4
nucleosome-mobilization:4	-1	4	-1	-1	4	-1	-1	-1	-1
nucleosome-organization:4	-1	4	4	4	4	4	4	4	4
nucleosome-positioning:4	-1	-1	-1	4	-1	-1	-1	-1	-1
nucleotide-catabolic-process:4	-1	-1	-1	-1	4	-1	-1	-1	4
nucleotide-excision-repair:4	-1	-1	-1	4	4	-1	4	4	4
nucleus-localization:4	-1	-1	-1	-1	4	-1	-1	4	-1
nucleus-organization:4	-1	4	-1	4	4	-1	-1	4	-1
oligosaccharide-lipid-intermediate-biosynthetic-process:4	-1	-1	-1	-1	-1	-1	-1	4	-1
organelle-fission:4	4	4	4	4	4	4	4	-1	4
organelle-fusion:4	4	-1	-1	-1	4	4	4	-1	4
organelle-organization:4	4	4	4	4	4	4	4	4	4
organelle-transport-along-microtubule:4	-1	-1	-1	-1	4	-1	-1	4	-1
organic-substance-transport:4	-1	-1	-1	-1	-1	4	-1	-1	-1
organophosphate-metabolic-process:4	-1	-1	-1	-1	-1	-1	-1	4	-1
oxidative-phosphorylation:4	-1	-1	-1	-1	-1	-1	-1	4	-1
pH-reduction:4	-1	-1	-1	-1	4	-1	4	-1	-1
peptidyl-amino-acid-modification:4	-1	4	-1	-1	4	-1	-1	-1	-1
peptidyl-lysine-acetylation:4	-1	4	4	-1	4	4	4	4	4
peptidyl-lysine-modification:4	-1	4	-1	4	4	-1	-1	-1	-1
peroxisome-organization:4	4	-1	-1	-1	-1	-1	4	-1	4
pheromone-dependent-signal-transduction-involved-in-conjugation-with-cellular-fusion:4	-1	-1	-1	-1	-1	-1	4	-1	4
phosphate-metabolic-process:4	-1	-1	4	-1	-1	-1	4	-1	-1
phosphatidylinositol-biosynthetic-process:4	-1	-1	4	4	4	-1	4	4	-1
phosphatidylinositol-metabolic-process:4	-1	4	4	4	-1	-1	-1	4	-1
phosphatidylinositol-phosphorylation:4	-1	-1	-1	-1	-1	-1	-1	-1	4
phospholipid-biosynthetic-process:4	4	-1	4	-1	-1	-1	-1	4	-1
phospholipid-metabolic-process:4	-1	-1	-1	-1	-1	-1	-1	4	-1
phospholipid-translocation:4	-1	-1	-1	4	-1	-1	-1	-1	-1
phospholipid-transport:4	-1	-1	4	-1	-1	-1	-1	-1	-1
phosphorus-metabolic-process:4	-1	-1	4	-1	-1	-1	4	-1	-1
phosphorylation-of-RNA-polymerase-II-C-terminal-domain:4	-1	4	4	-1	4	-1	4	4	4
poly(A)+-mRNA-export-from-nucleus:4	-1	-1	-1	4	-1	-1	-1	4	-1
positive-regulation-of-DNA-metabolic-process:4	-1	-1	-1	-1	-1	-1	-1	4	-1
positive-regulation-of-GTPase-activity:4	-1	-1	4	-1	4	4	4	-1	4
positive-regulation-of-RNA-metabolic-process:4	-1	-1	4	4	4	-1	-1	-1	4
positive-regulation-of-biological-process:4	-1	-1	4	4	4	-1	-1	-1	-1
positive-regulation-of-biosynthetic-process:4	-1	-1	4	4	4	-1	-1	-1	-1
positive-regulation-of-catalytic-activity:4	-1	-1	-1	-1	4	-1	4	-1	4
positive-regulation-of-cellular-biosynthetic-process:4	-1	-1	4	4	4	-1	-1	-1	-1
positive-regulation-of-cellular-metabolic-process:4	-1	-1	-1	4	4	-1	-1	-1	-1
positive-regulation-of-cellular-process:4	-1	-1	4	4	4	-1	4	-1	4
positive-regulation-of-gene-expression:4	-1	-1	4	4	4	-1	-1	-1	4
positive-regulation-of-gene-expression,-epigenetic:4	-1	-1	-1	-1	4	-1	-1	-1	-1
positive-regulation-of-histone-modification:4	-1	-1	-1	-1	-1	-1	-1	4	-1
positive-regulation-of-hydrolase-activity:4	-1	-1	4	-1	4	-1	4	-1	4
positive-regulation-of-macromolecule-biosynthetic-process:4	-1	-1	4	4	4	-1	-1	-1	-1
positive-regulation-of-macromolecule-metabolic-process:4	-1	-1	-1	4	4	-1	-1	-1	-1
positive-regulation-of-metabolic-process:4	-1	-1	-1	4	4	-1	-1	-1	-1
positive-regulation-of-molecular-function:4	-1	-1	-1	-1	-1	-1	4	-1	4
positive-regulation-of-nitrogen-compound-metabolic-process:4	-1	-1	4	4	4	-1	-1	-1	4
positive-regulation-of-nucleobase,-nucleoside,-nucleotide-and-nucleic-acid-metabolic-process:4	-1	-1	4	4	4	-1	-1	-1	4
positive-regulation-of-transcription,-DNA-dependent:4	-1	-1	4	4	4	-1	-1	-1	4
positive-regulation-of-transcription-from-RNA-polymerase-II-promoter:4	-1	-1	4	-1	4	-1	-1	-1	4
post-Golgi-vesicle-mediated-transport:4	4	4	4	-1	4	4	4	-1	4
postreplication-repair:4	-1	-1	4	-1	-1	-1	-1	-1	-1
posttranscriptional-tethering-of-RNA-polymerase-II-gene-DNA-at-nuclear-periphery:4	-1	-1	-1	4	-1	-1	-1	4	-1
posttranslational-protein-targeting-to-membrane,-translocation:4	-1	-1	-1	4	-1	-1	-1	-1	-1
pre-replicative-complex-assembly:4	-1	-1	-1	4	-1	-1	-1	-1	-1
primary-metabolic-process:4	-1	-1	-1	4	-1	-1	-1	-1	-1
progressive-alteration-of-chromatin-involved-in-cell-aging:4	-1	-1	-1	4	-1	-1	-1	4	-1
progressive-alteration-of-chromatin-involved-in-replicative-cell-aging:4	-1	-1	-1	4	-1	-1	-1	-1	-1
protein-DNA-complex-assembly:4	-1	-1	4	4	4	-1	4	4	4
protein-DNA-complex-disassembly:4	-1	4	4	4	4	4	4	4	4
protein-DNA-complex-subunit-organization:4	-1	4	4	4	4	4	4	4	4
protein-N-linked-glycosylation:4	4	4	4	-1	4	4	4	4	4
protein-O-linked-glycosylation:4	-1	4	4	4	4	-1	4	-1	4
protein-acetylation:4	-1	4	4	-1	4	4	-1	4	-1
protein-acylation:4	4	4	4	4	4	4	4	4	-1
protein-alkylation:4	-1	-1	-1	4	-1	-1	-1	4	-1
protein-deacetylation:4	4	4	4	-1	4	-1	-1	-1	-1
protein-deacylation:4	4	4	4	-1	4	-1	-1	4	4
protein-dephosphorylation:4	-1	-1	-1	-1	-1	-1	4	-1	4
protein-export-from-nucleus:4	-1	-1	-1	-1	-1	-1	-1	4	-1
protein-glycosylation:4	4	4	4	4	4	4	4	4	4
protein-import:4	-1	-1	-1	-1	-1	-1	-1	4	-1
protein-import-into-nucleus:4	-1	-1	-1	4	-1	-1	-1	4	-1
protein-insertion-into-membrane:4	4	-1	-1	-1	-1	-1	-1	-1	-1
protein-lipidation:4	-1	-1	-1	4	-1	-1	-1	4	-1
protein-localization:4	4	4	4	4	4	4	4	4	4
protein-localization-to-chromosome:4	4	-1	4	-1	4	-1	4	-1	4
protein-localization-to-kinetochore:4	4	-1	-1	-1	-1	-1	-1	-1	-1
protein-localization-to-nucleus:4	-1	-1	-1	4	-1	-1	-1	4	-1
protein-localization-to-organelle:4	4	-1	4	-1	-1	-1	4	4	4
protein-localization-to-vacuole:4	-1	-1	-1	-1	-1	-1	4	-1	4
protein-maturation:4	-1	-1	-1	-1	-1	-1	4	-1	-1
protein-metabolic-process:4	4	4	-1	-1	-1	-1	-1	-1	-1
protein-methylation:4	-1	-1	-1	4	-1	-1	-1	4	-1
protein-modification-by-small-protein-conjugation:4	4	-1	4	-1	4	-1	4	-1	4
protein-modification-by-small-protein-conjugation-or-removal:4	4	-1	-1	-1	-1	-1	4	-1	4
protein-modification-process:4	4	4	4	4	4	4	4	4	4
protein-phosphorylation:4	-1	-1	4	-1	4	-1	-1	-1	-1
protein-sumoylation:4	-1	-1	-1	-1	4	-1	-1	-1	-1
protein-targeting:4	4	-1	-1	-1	-1	-1	-1	-1	4
protein-targeting-to-vacuole:4	-1	-1	-1	-1	-1	-1	4	-1	4
protein-transport:4	4	4	4	4	4	4	4	-1	4
protein-ubiquitination:4	4	-1	4	-1	4	-1	4	-1	4
proton-transporting-ATP-synthase-complex-assembly:4	4	-1	-1	-1	-1	-1	-1	-1	-1
proton-transporting-two-sector-ATPase-complex-assembly:4	4	-1	-1	-1	-1	-1	-1	-1	-1
pseudohyphal-growth:4	-1	-1	-1	-1	-1	-1	4	-1	4
purine-nucleoside-triphosphate-catabolic-process:4	-1	-1	-1	-1	4	-1	-1	-1	-1
purine-nucleotide-catabolic-process:4	-1	-1	-1	-1	4	-1	-1	-1	-1
purine-ribonucleoside-triphosphate-catabolic-process:4	-1	-1	-1	-1	4	-1	-1	-1	-1
purine-ribonucleotide-catabolic-process:4	-1	-1	-1	-1	4	-1	-1	-1	-1
rRNA-export-from-nucleus:4	-1	4	-1	-1	-1	-1	-1	-1	-1
rRNA-transport:4	-1	4	-1	-1	-1	-1	-1	-1	-1
re-entry-into-mitotic-cell-cycle:4	-1	4	-1	-1	4	-1	4	-1	4
re-entry-into-mitotic-cell-cycle-after-pheromone-arrest:4	-1	-1	-1	-1	-1	-1	4	-1	4
recombinational-repair:4	-1	-1	-1	4	4	-1	4	-1	4
regulation-of-ARF-GTPase-activity:4	-1	-1	-1	-1	4	4	-1	-1	-1
regulation-of-ARF-protein-signal-transduction:4	-1	4	4	-1	4	4	4	-1	-1
regulation-of-DNA-dependent-DNA-replication:4	-1	4	4	-1	4	-1	-1	4	-1
regulation-of-DNA-dependent-DNA-replication-initiation:4	-1	4	4	-1	-1	-1	-1	-1	-1
regulation-of-DNA-metabolic-process:4	-1	-1	4	-1	4	-1	-1	-1	-1
regulation-of-DNA-recombination:4	-1	-1	-1	4	4	-1	-1	-1	-1
regulation-of-G2/M-transition-of-mitotic-cell-cycle:4	-1	-1	-1	-1	4	-1	-1	-1	-1
regulation-of-GTP-catabolic-process:4	-1	-1	4	-1	4	-1	4	-1	4
regulation-of-GTPase-activity:4	-1	-1	4	-1	4	-1	4	-1	4
regulation-of-RNA-metabolic-process:4	4	4	4	4	4	4	4	4	4
regulation-of-Ras-GTPase-activity:4	-1	-1	4	4	4	-1	4	-1	4
regulation-of-Ras-protein-signal-transduction:4	-1	4	4	-1	4	-1	4	-1	4
regulation-of-SNARE-complex-assembly:4	4	4	-1	-1	-1	-1	4	-1	4
regulation-of-actin-cytoskeleton-organization:4	-1	-1	-1	-1	-1	-1	4	-1	-1
regulation-of-actin-filament-based-process:4	-1	-1	-1	-1	-1	-1	4	-1	-1
regulation-of-anatomical-structure-size:4	-1	-1	-1	-1	4	-1	4	-1	4
regulation-of-biological-process:4	4	4	4	4	4	4	4	4	4
regulation-of-biological-quality:4	4	-1	4	-1	4	-1	4	-1	4
regulation-of-biosynthetic-process:4	4	4	4	4	4	4	4	4	4
regulation-of-cAMP-biosynthetic-process:4	-1	-1	-1	-1	4	-1	-1	-1	-1
regulation-of-cAMP-metabolic-process:4	-1	-1	-1	-1	4	-1	-1	-1	-1
regulation-of-catalytic-activity:4	-1	-1	-1	-1	-1	-1	4	-1	4
regulation-of-cell-communication:4	-1	-1	-1	-1	-1	-1	4	-1	4
regulation-of-cell-cycle:4	4	4	4	4	4	4	4	-1	4
regulation-of-cell-cycle-arrest:4	4	-1	4	4	4	4	4	-1	4
regulation-of-cell-cycle-process:4	4	4	4	4	4	4	4	-1	4
regulation-of-cell-growth:4	-1	4	4	-1	4	-1	-1	-1	-1
regulation-of-cell-size:4	-1	-1	-1	-1	4	-1	4	-1	4
regulation-of-cellular-biosynthetic-process:4	4	4	4	4	4	4	4	4	4
regulation-of-cellular-catabolic-process:4	-1	-1	4	-1	4	-1	4	-1	4
regulation-of-cellular-component-biogenesis:4	-1	-1	-1	-1	-1	-1	4	-1	-1
regulation-of-cellular-component-organization:4	4	-1	-1	-1	4	-1	4	4	-1
regulation-of-cellular-component-size:4	-1	-1	-1	-1	4	-1	4	-1	4
regulation-of-cellular-localization:4	4	4	4	-1	-1	-1	4	-1	4
regulation-of-cellular-macromolecule-biosynthetic-process:4	4	4	4	4	4	4	4	4	4
regulation-of-cellular-metabolic-process:4	4	4	4	4	4	4	4	4	4
regulation-of-cellular-pH:4	-1	-1	-1	-1	4	-1	4	-1	4
regulation-of-cellular-process:4	4	4	4	4	4	4	4	4	4
regulation-of-chromatin-silencing:4	-1	-1	-1	4	4	-1	4	4	-1
regulation-of-chromatin-silencing-at-telomere:4	-1	4	-1	-1	4	-1	4	-1	-1
regulation-of-conjugation-with-cellular-fusion-by-signal-transduction:4	-1	-1	-1	-1	-1	-1	4	-1	4
regulation-of-cyclic-nucleotide-biosynthetic-process:4	-1	-1	-1	-1	4	-1	-1	-1	-1
regulation-of-cyclic-nucleotide-metabolic-process:4	-1	-1	-1	-1	4	-1	-1	-1	-1
regulation-of-cytokinesis:4	-1	-1	-1	-1	4	-1	-1	-1	-1
regulation-of-cytoskeleton-organization:4	-1	-1	-1	-1	-1	-1	4	-1	-1
regulation-of-exit-from-mitosis:4	-1	4	-1	-1	4	-1	-1	-1	-1
regulation-of-gene-expression:4	4	4	4	4	4	4	4	4	4
regulation-of-gene-expression,-epigenetic:4	-1	4	4	4	4	4	-1	4	-1
regulation-of-gene-silencing:4	-1	-1	-1	4	4	-1	4	4	-1
regulation-of-growth:4	-1	4	4	-1	4	-1	-1	-1	-1
regulation-of-hydrolase-activity:4	-1	-1	4	-1	4	-1	4	-1	4
regulation-of-intracellular-pH:4	-1	-1	-1	-1	4	-1	4	-1	4
regulation-of-intracellular-transport:4	4	-1	-1	-1	-1	-1	4	-1	4
regulation-of-localization:4	4	4	4	-1	4	-1	4	-1	-1
regulation-of-macromolecule-biosynthetic-process:4	4	4	4	4	4	4	4	4	4
regulation-of-macromolecule-metabolic-process:4	-1	4	4	4	4	4	4	4	4
regulation-of-membrane-lipid-distribution:4	-1	-1	4	4	-1	-1	-1	-1	-1
regulation-of-metabolic-process:4	4	4	4	4	4	4	4	4	4
regulation-of-microtubule-polymerization-or-depolymerization:4	-1	-1	-1	-1	4	-1	-1	-1	-1
regulation-of-mitosis:4	4	-1	4	-1	4	4	4	4	4
regulation-of-mitotic-cell-cycle:4	4	4	4	4	4	4	4	4	4
regulation-of-mitotic-metaphase/anaphase-transition:4	-1	-1	4	-1	4	4	4	-1	4
regulation-of-molecular-function:4	-1	-1	-1	-1	-1	-1	-1	-1	4
regulation-of-nitrogen-compound-metabolic-process:4	4	4	4	4	4	4	4	4	4
regulation-of-nuclear-division:4	4	-1	4	-1	4	4	4	4	4
regulation-of-nucleobase,-nucleoside,-nucleotide-and-nucleic-acid-metabolic-process:4	4	4	4	4	4	4	4	4	4
regulation-of-nucleocytoplasmic-transport:4	4	-1	-1	-1	-1	-1	-1	-1	-1
regulation-of-nucleotide-biosynthetic-process:4	-1	-1	-1	-1	4	-1	-1	-1	-1
regulation-of-nucleotide-catabolic-process:4	-1	-1	4	-1	4	-1	4	-1	4
regulation-of-nucleotide-metabolic-process:4	-1	-1	4	-1	4	-1	4	-1	4
regulation-of-organelle-organization:4	4	-1	-1	-1	-1	-1	4	4	-1
regulation-of-pH:4	-1	-1	4	-1	4	-1	4	-1	4
regulation-of-primary-metabolic-process:4	4	4	4	4	4	4	4	4	4
regulation-of-protein-complex-assembly:4	-1	-1	-1	-1	-1	-1	4	-1	-1
regulation-of-protein-polymerization:4	-1	-1	-1	-1	-1	-1	4	-1	-1
regulation-of-purine-nucleotide-catabolic-process:4	-1	-1	4	-1	4	-1	4	-1	4
regulation-of-response-to-stimulus:4	-1	4	4	4	4	4	4	-1	4
regulation-of-signal-transduction:4	-1	4	4	-1	4	-1	4	-1	4
regulation-of-signaling:4	-1	4	4	4	4	-1	4	-1	4
regulation-of-small-GTPase-mediated-signal-transduction:4	-1	4	4	4	4	-1	4	-1	4
regulation-of-transcription,-DNA-dependent:4	4	4	4	4	4	4	4	4	4
regulation-of-transcription-elongation,-DNA-dependent:4	-1	-1	-1	4	-1	-1	-1	-1	-1
regulation-of-transcription-from-RNA-polymerase-I-promoter:4	-1	-1	-1	4	-1	-1	-1	-1	-1
regulation-of-transcription-from-RNA-polymerase-II-promoter:4	-1	4	4	4	4	-1	4	4	4
regulation-of-transcription-involved-in-G2/M-phase-of-mitotic-cell-cycle:4	-1	-1	-1	-1	-1	-1	-1	4	-1
regulation-of-transport:4	4	4	-1	-1	4	-1	4	-1	-1
regulation-of-transposition:4	-1	-1	-1	-1	-1	-1	4	-1	-1
regulation-of-transposition,-RNA-mediated:4	-1	-1	-1	-1	-1	-1	4	-1	-1
regulation-of-vesicle-fusion:4	4	4	4	-1	-1	-1	4	-1	4
regulation-of-vesicle-mediated-transport:4	4	4	4	-1	4	-1	4	-1	4
reproduction:4	-1	4	-1	4	4	-1	4	-1	4
reproduction-of-a-single-celled-organism:4	-1	-1	-1	-1	4	-1	4	-1	4
reproductive-process:4	-1	-1	-1	-1	4	-1	4	-1	4
respiratory-chain-complex-III-assembly:4	-1	-1	-1	-1	-1	-1	-1	4	-1
respiratory-electron-transport-chain:4	-1	-1	-1	-1	-1	-1	-1	4	-1
response-to-DNA-damage-stimulus:4	4	-1	4	4	4	4	4	4	4
response-to-acid:4	-1	-1	4	-1	4	-1	4	-1	4
response-to-biotic-stimulus:4	-1	-1	4	-1	4	-1	-1	-1	-1
response-to-drug:4	-1	-1	-1	-1	4	-1	-1	-1	-1
response-to-organic-substance:4	-1	4	4	4	4	-1	4	-1	4
response-to-pheromone:4	-1	4	-1	4	4	-1	4	-1	4
response-to-pheromone-involved-in-conjugation-with-cellular-fusion:4	-1	4	-1	-1	4	-1	4	-1	4
response-to-stimulus:4	-1	-1	4	4	4	-1	4	-1	4
response-to-stress:4	-1	-1	4	4	4	-1	-1	-1	4
retrograde-transport,-endosome-to-Golgi:4	-1	-1	-1	-1	-1	-1	4	-1	4
retrograde-vesicle-mediated-transport,-Golgi-to-ER:4	4	4	4	-1	4	-1	4	-1	4
ribonucleoside-triphosphate-catabolic-process:4	-1	-1	-1	-1	4	-1	-1	-1	-1
ribonucleotide-catabolic-process:4	-1	-1	-1	-1	4	-1	-1	-1	-1
ribosomal-protein-import-into-nucleus:4	-1	-1	-1	-1	-1	-1	-1	4	-1
secretion:4	4	-1	4	-1	4	4	4	-1	4
secretion-by-cell:4	4	-1	4	-1	4	4	4	-1	4
septin-cytoskeleton-organization:4	-1	-1	-1	-1	4	-1	-1	-1	-1
septin-ring-assembly:4	-1	-1	-1	-1	4	-1	-1	-1	-1
septin-ring-organization:4	-1	-1	-1	-1	4	-1	-1	-1	-1
sexual-reproduction:4	-1	4	-1	-1	4	-1	4	-1	4
signal-transduction:4	-1	4	4	-1	4	-1	4	-1	4
signaling:4	-1	4	4	-1	4	-1	4	-1	4
sister-chromatid-cohesion:4	-1	-1	-1	4	4	-1	4	-1	4
sister-chromatid-segregation:4	-1	-1	4	4	4	-1	4	-1	4
small-GTPase-mediated-signal-transduction:4	4	-1	4	-1	4	-1	4	-1	-1
snRNA-export-from-nucleus:4	-1	-1	-1	-1	-1	-1	-1	4	-1
snRNA-transport:4	-1	-1	-1	-1	-1	-1	-1	4	-1
snRNP-protein-import-into-nucleus:4	-1	-1	-1	-1	-1	-1	-1	4	-1
spindle-assembly-checkpoint:4	-1	-1	4	-1	4	4	4	-1	4
spindle-checkpoint:4	4	-1	4	-1	4	4	4	-1	4
spindle-elongation:4	-1	-1	-1	-1	4	-1	-1	-1	-1
spindle-organization:4	-1	-1	-1	-1	4	-1	4	-1	-1
spindle-pole-body-organization:4	-1	-1	-1	4	-1	-1	-1	-1	-1
spliceosomal-conformational-changes-to-generate-catalytic-conformation:4	4	-1	-1	-1	4	-1	4	4	4
spliceosome-assembly:4	-1	-1	-1	-1	-1	-1	4	-1	4
sterol-transport:4	-1	-1	-1	-1	4	-1	-1	-1	-1
stress-granule-assembly:4	-1	-1	-1	4	-1	-1	-1	-1	-1
tRNA-aminoacylation:4	-1	-1	-1	-1	-1	-1	-1	4	-1
tRNA-export-from-nucleus:4	-1	-1	-1	-1	-1	-1	-1	4	-1
tRNA-gene-clustering:4	-1	-1	-1	4	4	-1	-1	-1	-1
tRNA-transport:4	-1	-1	-1	-1	-1	-1	-1	4	-1
telomere-capping:4	-1	-1	-1	4	-1	-1	-1	-1	-1
telomere-maintenance:4	-1	-1	4	-1	4	-1	-1	-1	-1
telomere-maintenance-via-recombination:4	4	-1	4	-1	-1	-1	4	-1	4
telomere-organization:4	-1	-1	4	-1	4	-1	-1	-1	-1
termination-of-RNA-polymerase-II-transcription,-exosome-dependent:4	-1	4	4	-1	-1	-1	-1	-1	-1
termination-of-RNA-polymerase-II-transcription,-poly(A)-coupled:4	-1	4	-1	-1	-1	-1	-1	-1	-1
transcription,-DNA-dependent:4	4	4	4	4	4	4	4	4	4
transcription-coupled-nucleotide-excision-repair:4	-1	-1	-1	4	4	-1	4	4	4
transcription-dependent-tethering-of-RNA-polymerase-II-gene-DNA-at-nuclear-periphery:4	-1	-1	-1	4	-1	-1	-1	4	-1
transcription-elongation,-DNA-dependent:4	4	4	4	4	4	4	4	4	4
transcription-elongation-from-RNA-polymerase-II-promoter:4	4	4	4	4	4	4	4	4	4
transcription-from-RNA-polymerase-II-promoter:4	4	4	4	4	4	4	4	4	4
transcription-initiation,-DNA-dependent:4	4	-1	4	-1	4	4	4	4	4
transcription-initiation-from-RNA-polymerase-II-promoter:4	4	4	4	4	4	4	4	-1	4
transcription-initiation-from-RNA-polymerase-III-promoter:4	-1	-1	-1	-1	-1	-1	-1	4	-1
transmembrane-transport:4	-1	-1	-1	-1	-1	4	-1	-1	-1
transport:4	4	4	4	-1	4	4	4	-1	4
tricarboxylic-acid-cycle:4	-1	-1	-1	-1	-1	-1	-1	4	-1
tryptophan-biosynthetic-process:4	4	-1	-1	-1	-1	-1	-1	-1	-1
ubiquitin-dependent-endocytosis:4	-1	-1	-1	-1	-1	-1	4	-1	4
vacuolar-acidification:4	-1	-1	-1	-1	4	-1	4	-1	-1
vacuolar-transport:4	4	-1	-1	-1	-1	4	4	-1	4
vacuole-organization:4	-1	-1	-1	-1	-1	-1	4	-1	4
vesicle-docking:4	4	-1	-1	-1	-1	4	4	-1	4
vesicle-docking-involved-in-exocytosis:4	4	-1	-1	-1	-1	-1	4	-1	-1
vesicle-fusion:4	4	-1	-1	-1	4	4	4	-1	4
vesicle-fusion-with-Golgi-apparatus:4	4	-1	-1	-1	-1	-1	-1	-1	-1
vesicle-mediated-transport:4	4	4	4	4	4	4	4	-1	4
vesicle-organization:4	4	-1	4	-1	4	4	4	-1	4
END	-2	-2	-2	-2	-2	-2	-2	-2	-2
1,6-beta-glucan-metabolic-process:5	-1	-1	5	-1	5	-1	-1	-1	-1
ATP-biosynthetic-process:5	-1	-1	5	-1	-1	-1	-1	-1	-1
ATP-hydrolysis-coupled-proton-transport:5	-1	5	-1	-1	-1	-1	-1	-1	-1
ATP-metabolic-process:5	5	-1	5	-1	-1	-1	-1	-1	-1
ATP-synthesis-coupled-electron-transport:5	5	-1	5	-1	5	-1	-1	-1	-1
ATP-synthesis-coupled-proton-transport:5	5	5	5	-1	5	-1	-1	-1	-1
COPII-coated-vesicle-budding:5	-1	-1	-1	-1	-1	-1	-1	5	-1
CVT-pathway:5	-1	5	-1	-1	-1	-1	-1	5	-1
DNA-metabolic-process:5	-1	-1	-1	5	-1	-1	-1	-1	-1
DNA-repair:5	-1	-1	-1	5	-1	-1	-1	-1	-1
ER-associated-protein-catabolic-process:5	-1	5	-1	-1	-1	-1	5	-1	-1
ER-to-Golgi-vesicle-mediated-transport:5	-1	-1	-1	-1	-1	-1	-1	5	-1
Golgi-to-endosome-transport:5	-1	-1	-1	5	-1	-1	-1	-1	-1
Golgi-to-plasma-membrane-transport:5	-1	-1	-1	5	-1	-1	-1	5	-1
Golgi-to-vacuole-transport:5	-1	-1	-1	5	5	-1	-1	-1	-1
Golgi-vesicle-transport:5	-1	-1	-1	5	-1	-1	-1	5	-1
M-phase:5	-1	-1	-1	5	-1	-1	-1	-1	-1
M-phase-of-meiotic-cell-cycle:5	-1	-1	-1	5	-1	-1	-1	-1	-1
M-phase-of-mitotic-cell-cycle:5	-1	-1	-1	5	-1	-1	-1	-1	-1
MAPKKK-cascade:5	5	-1	-1	5	-1	-1	-1	-1	-1
MAPKKK-cascade-involved-in-osmosensory-signaling-pathway:5	5	-1	5	-1	5	-1	-1	-1	-1
NADP-metabolic-process:5	-1	-1	-1	-1	-1	-1	5	-1	5
NADPH-regeneration:5	-1	-1	-1	-1	-1	-1	5	-1	5
RNA-biosynthetic-process:5	-1	-1	-1	5	-1	-1	-1	-1	-1
RNA-dependent-DNA-replication:5	-1	-1	-1	5	-1	-1	-1	-1	-1
acetyl-CoA-biosynthetic-process:5	5	-1	-1	-1	-1	-1	-1	-1	-1
actin-cortical-patch-assembly:5	5	5	5	-1	-1	5	-1	-1	-1
actin-cortical-patch-localization:5	-1	-1	5	5	5	-1	-1	5	-1
actin-cytoskeleton-organization:5	5	5	5	5	5	5	-1	5	-1
actin-filament-based-process:5	5	5	5	5	5	5	-1	5	-1
actin-filament-organization:5	5	5	5	5	5	5	-1	5	-1
actin-polymerization-or-depolymerization:5	5	-1	5	-1	5	-1	-1	5	-1
activation-of-protein-kinase-activity:5	-1	-1	5	5	5	-1	-1	5	-1
acylglycerol-metabolic-process:5	-1	-1	-1	-1	-1	-1	5	-1	-1
adaptation-of-signaling-pathway:5	-1	-1	-1	-1	-1	-1	-1	5	-1
adaptation-of-signaling-pathway-by-response-to-pheromone-involved-in-conjugation-with-cellular-fusion:5	-1	-1	-1	-1	-1	-1	-1	5	-1
aerobic-respiration:5	5	-1	5	-1	5	-1	-1	-1	-1
aminoglycan-biosynthetic-process:5	-1	-1	-1	-1	-1	-1	-1	5	-1
aminoglycan-metabolic-process:5	-1	-1	-1	-1	-1	-1	-1	5	-1
anaphase-promoting-complex-dependent-proteasomal-ubiquitin-dependent-protein-catabolic-process:5	-1	-1	-1	-1	-1	-1	-1	5	-1
anatomical-structure-development:5	-1	-1	-1	5	-1	-1	-1	-1	-1
anatomical-structure-morphogenesis:5	-1	-1	-1	5	-1	-1	-1	-1	-1
ascospore-wall-assembly:5	-1	-1	5	-1	5	-1	-1	-1	-1
ascospore-wall-biogenesis:5	-1	-1	5	-1	5	-1	-1	-1	-1
asexual-reproduction:5	-1	-1	-1	5	-1	-1	-1	5	-1
autophagic-vacuole-assembly:5	-1	-1	-1	-1	-1	-1	5	-1	-1
autophagy:5	-1	5	-1	5	-1	-1	5	5	-1
beta-glucan-biosynthetic-process:5	-1	-1	5	-1	5	-1	-1	-1	-1
beta-glucan-metabolic-process:5	-1	-1	5	-1	5	-1	-1	-1	-1
biological-regulation:5	-1	-1	-1	5	-1	-1	-1	5	-1
bipolar-cellular-bud-site-selection:5	-1	5	-1	5	-1	-1	-1	5	-1
budding-cell-apical-bud-growth:5	-1	-1	-1	-1	-1	-1	-1	5	-1
budding-cell-bud-growth:5	-1	-1	-1	-1	-1	-1	-1	5	-1
budding-cell-isotropic-bud-growth:5	-1	-1	-1	-1	-1	-1	-1	5	-1
carbohydrate-transport:5	-1	5	5	5	5	5	-1	-1	-1
catabolic-process:5	5	5	5	-1	5	5	5	-1	5
cation-homeostasis:5	-1	-1	5	-1	-1	-1	-1	-1	-1
cell-budding:5	-1	-1	-1	5	-1	-1	-1	5	-1
cell-communication:5	-1	5	-1	-1	-1	-1	-1	5	-1
cell-cycle:5	-1	-1	-1	5	-1	-1	-1	-1	-1
cell-cycle-cytokinesis:5	-1	-1	-1	5	-1	-1	-1	5	-1
cell-cycle-phase:5	-1	-1	-1	5	-1	-1	-1	-1	-1
cell-cycle-process:5	-1	-1	-1	5	-1	-1	-1	-1	-1
cell-differentiation:5	-1	-1	-1	5	-1	-1	-1	-1	-1
cell-division:5	-1	-1	-1	5	-1	-1	-1	5	-1
cell-growth:5	-1	-1	-1	-1	-1	-1	-1	5	-1
cell-morphogenesis-involved-in-conjugation:5	-1	-1	-1	5	-1	-1	-1	-1	-1
cell-morphogenesis-involved-in-conjugation-with-cellular-fusion:5	-1	-1	-1	5	-1	-1	-1	-1	-1
cell-wall-assembly:5	-1	-1	5	-1	5	-1	-1	-1	-1
cell-wall-biogenesis:5	-1	-1	5	5	5	-1	-1	5	-1
cell-wall-chitin-biosynthetic-process:5	-1	-1	-1	-1	-1	-1	-1	5	-1
cell-wall-chitin-metabolic-process:5	-1	-1	-1	-1	-1	-1	-1	5	-1
cell-wall-macromolecule-biosynthetic-process:5	-1	-1	-1	-1	-1	-1	-1	5	-1
cell-wall-organization:5	-1	-1	-1	5	5	-1	-1	5	-1
cell-wall-organization-or-biogenesis:5	-1	-1	-1	5	5	-1	-1	5	-1
cell-wall-polysaccharide-biosynthetic-process:5	-1	-1	-1	-1	-1	-1	-1	5	-1
cell-wall-polysaccharide-metabolic-process:5	-1	-1	-1	-1	-1	-1	-1	5	-1
cellular-bud-site-selection:5	-1	-1	-1	5	-1	-1	-1	5	-1
cellular-catabolic-process:5	5	5	5	-1	5	5	5	-1	5
cellular-cell-wall-macromolecule-metabolic-process:5	-1	-1	-1	-1	-1	-1	-1	5	-1
cellular-cell-wall-organization:5	-1	-1	-1	5	5	-1	-1	5	-1
cellular-cell-wall-organization-or-biogenesis:5	-1	-1	-1	5	5	-1	-1	5	-1
cellular-component-assembly-involved-in-morphogenesis:5	-1	-1	5	-1	5	-1	-1	5	-1
cellular-component-macromolecule-biosynthetic-process:5	-1	-1	-1	-1	-1	-1	-1	5	-1
cellular-component-organization:5	-1	5	5	5	-1	-1	-1	5	-1
cellular-component-organization-at-cellular-level:5	-1	5	-1	5	-1	-1	-1	5	-1
cellular-component-organization-or-biogenesis:5	-1	-1	-1	5	-1	-1	-1	5	-1
cellular-component-organization-or-biogenesis-at-cellular-level:5	-1	-1	-1	5	-1	-1	-1	-1	-1
cellular-developmental-process:5	-1	-1	-1	5	-1	-1	-1	-1	-1
cellular-glucan-metabolic-process:5	5	-1	5	-1	-1	-1	-1	-1	-1
cellular-lipid-catabolic-process:5	-1	-1	-1	-1	-1	-1	5	-1	-1
cellular-localization:5	-1	5	-1	5	-1	-1	-1	5	-1
cellular-macromolecule-catabolic-process:5	5	5	5	-1	5	5	5	-1	5
cellular-macromolecule-localization:5	-1	5	-1	5	-1	-1	-1	5	-1
cellular-membrane-fusion:5	-1	5	-1	5	5	-1	-1	5	-1
cellular-membrane-organization:5	5	5	5	5	5	-1	-1	5	-1
cellular-monovalent-inorganic-cation-homeostasis:5	-1	5	-1	-1	-1	-1	-1	-1	-1
cellular-nitrogen-compound-catabolic-process:5	5	-1	-1	-1	-1	-1	-1	-1	-1
cellular-polysaccharide-biosynthetic-process:5	-1	-1	5	-1	-1	-1	-1	-1	-1
cellular-polysaccharide-metabolic-process:5	5	-1	5	-1	-1	-1	-1	-1	-1
cellular-process-involved-in-reproduction:5	-1	-1	-1	5	-1	-1	-1	-1	-1
cellular-protein-catabolic-process:5	5	5	5	-1	5	5	5	5	5
cellular-protein-complex-assembly:5	5	5	5	-1	5	-1	5	-1	5
cellular-protein-localization:5	-1	5	5	5	-1	-1	-1	5	-1
cellular-protein-metabolic-process:5	-1	5	-1	-1	-1	-1	5	-1	5
cellular-respiration:5	5	-1	5	-1	5	-1	-1	-1	-1
cellular-response-to-abiotic-stimulus:5	5	-1	-1	5	-1	-1	-1	-1	-1
cellular-response-to-external-stimulus:5	-1	5	-1	-1	-1	-1	-1	-1	-1
cellular-response-to-extracellular-stimulus:5	-1	5	-1	-1	-1	-1	-1	-1	-1
cellular-response-to-nutrient-levels:5	-1	5	-1	-1	-1	-1	-1	5	-1
cellular-response-to-osmotic-stress:5	5	-1	5	-1	-1	-1	-1	-1	-1
cellular-response-to-starvation:5	-1	-1	-1	5	-1	-1	-1	-1	-1
cellular-response-to-stimulus:5	-1	-1	-1	5	-1	-1	-1	5	-1
cellular-response-to-stress:5	-1	-1	-1	5	-1	-1	-1	-1	-1
chemical-homeostasis:5	-1	-1	5	-1	-1	-1	-1	-1	-1
chitin-biosynthetic-process:5	-1	-1	-1	-1	-1	-1	-1	5	-1
chitin-metabolic-process:5	-1	-1	-1	-1	-1	-1	-1	5	-1
chromatin-modification:5	-1	-1	-1	5	-1	-1	-1	5	-1
chromatin-organization:5	-1	-1	-1	5	-1	-1	-1	5	-1
chromatin-remodeling:5	-1	-1	-1	5	-1	-1	-1	-1	-1
chromosome-organization:5	-1	-1	-1	5	-1	-1	-1	5	-1
chromosome-segregation:5	-1	-1	-1	5	-1	-1	-1	-1	-1
coenzyme-A-biosynthetic-process:5	-1	-1	-1	-1	-1	-1	-1	5	-1
coenzyme-biosynthetic-process:5	-1	5	-1	-1	-1	-1	-1	-1	-1
cofactor-biosynthetic-process:5	5	5	5	-1	5	-1	-1	-1	-1
cofactor-metabolic-process:5	-1	-1	5	-1	5	-1	-1	-1	-1
conjugation:5	-1	-1	-1	-1	-1	-1	-1	5	-1
conjugation-with-cellular-fusion:5	-1	-1	-1	-1	-1	-1	-1	5	-1
cortical-actin-cytoskeleton-organization:5	5	5	5	-1	5	5	-1	-1	-1
cortical-cytoskeleton-organization:5	5	5	5	-1	5	5	-1	-1	-1
covalent-chromatin-modification:5	-1	-1	-1	5	-1	-1	-1	5	-1
cyclin-catabolic-process:5	-1	-1	-1	-1	-1	-1	-1	5	-1
cytochrome-complex-assembly:5	5	-1	5	-1	5	-1	-1	-1	-1
cytokinesis:5	-1	-1	-1	5	-1	-1	-1	5	-1
cytokinesis,-site-selection:5	-1	-1	-1	5	-1	-1	-1	5	-1
cytokinetic-process:5	-1	-1	-1	5	-1	-1	-1	5	-1
cytoskeleton-organization:5	-1	-1	-1	5	-1	5	-1	5	-1
developmental-process:5	-1	-1	-1	5	-1	-1	-1	-1	-1
developmental-process-involved-in-reproduction:5	-1	-1	-1	5	-1	-1	-1	-1	-1
double-strand-break-repair:5	-1	-1	-1	5	-1	-1	-1	-1	-1
double-strand-break-repair-via-homologous-recombination:5	-1	-1	-1	5	-1	-1	-1	-1	-1
double-strand-break-repair-via-single-strand-annealing:5	-1	-1	-1	-1	-1	-1	5	-1	-1
early-endosome-to-Golgi-transport:5	-1	-1	-1	-1	-1	-1	-1	5	-1
electron-transport-chain:5	5	5	5	-1	5	-1	-1	-1	-1
endocytosis:5	5	5	5	5	5	-1	-1	5	-1
endoplasmic-reticulum-inheritance:5	-1	-1	-1	5	-1	-1	-1	-1	-1
endoplasmic-reticulum-organization:5	-1	-1	-1	5	-1	-1	-1	-1	-1
endosome-transport:5	5	5	5	5	5	5	-1	5	-1
endosome-transport-via-multivesicular-body-sorting-pathway:5	-1	-1	5	-1	5	-1	-1	5	-1
energy-coupled-proton-transport,-against-electrochemical-gradient:5	-1	5	-1	-1	-1	-1	-1	-1	-1
energy-coupled-proton-transport,-down-electrochemical-gradient:5	5	5	5	-1	5	-1	-1	-1	-1
energy-derivation-by-oxidation-of-organic-compounds:5	5	-1	5	-1	5	-1	-1	-1	-1
establishment-of-cell-polarity:5	-1	-1	-1	5	-1	-1	-1	5	-1
establishment-of-chromosome-localization:5	-1	-1	-1	5	-1	-1	-1	-1	-1
establishment-of-localization:5	5	5	5	5	5	5	-1	5	-1
establishment-of-localization-in-cell:5	-1	5	-1	5	-1	-1	-1	5	-1
establishment-of-mitochondrion-localization:5	5	-1	-1	-1	-1	-1	-1	-1	-1
establishment-of-protein-localization:5	-1	5	5	5	5	5	-1	5	-1
establishment-of-protein-localization-in-mitochondrion:5	-1	5	-1	-1	-1	-1	-1	-1	-1
establishment-of-protein-localization-to-organelle:5	-1	5	5	5	5	-1	-1	5	-1
establishment-of-protein-localization-to-peroxisome:5	-1	5	5	-1	-1	-1	-1	-1	5
establishment-of-protein-localization-to-vacuole:5	5	5	5	5	5	5	-1	5	-1
establishment-or-maintenance-of-actin-cytoskeleton-polarity:5	-1	-1	-1	5	-1	-1	-1	-1	-1
establishment-or-maintenance-of-cell-polarity:5	-1	-1	-1	5	-1	-1	-1	5	-1
establishment-or-maintenance-of-cytoskeleton-polarity:5	-1	-1	-1	5	-1	-1	-1	-1	-1
exocytosis:5	-1	5	5	5	5	-1	-1	5	-1
external-encapsulating-structure-organization:5	-1	-1	-1	5	5	-1	-1	5	-1
fatty-acid-metabolic-process:5	-1	5	-1	-1	-1	-1	-1	-1	-1
fatty-acid-oxidation:5	-1	-1	-1	-1	-1	-1	5	-1	-1
filamentous-growth-of-a-population-of-unicellular-organisms:5	-1	-1	-1	-1	-1	-1	-1	5	-1
fungal-type-cell-wall-assembly:5	-1	-1	5	-1	5	-1	-1	-1	-1
fungal-type-cell-wall-biogenesis:5	-1	-1	5	5	-1	-1	-1	-1	-1
fungal-type-cell-wall-chitin-biosynthetic-process:5	-1	-1	-1	-1	-1	-1	-1	5	-1
fungal-type-cell-wall-organization:5	-1	-1	-1	5	-1	-1	-1	5	-1
fungal-type-cell-wall-organization-or-biogenesis:5	-1	-1	5	5	5	-1	-1	5	-1
fungal-type-cell-wall-polysaccharide-biosynthetic-process:5	-1	-1	-1	-1	-1	-1	-1	5	-1
fungal-type-cell-wall-polysaccharide-metabolic-process:5	-1	-1	-1	-1	-1	-1	-1	5	-1
gene-conversion:5	-1	-1	-1	5	-1	-1	-1	-1	-1
generation-of-catalytic-spliceosome-for-second-transesterification-step:5	-1	-1	-1	5	-1	-1	-1	-1	-1
generation-of-precursor-metabolites-and-energy:5	5	-1	5	-1	5	-1	-1	-1	-1
glucan-biosynthetic-process:5	-1	-1	5	-1	-1	-1	-1	-1	-1
glucan-metabolic-process:5	5	-1	5	-1	-1	-1	-1	-1	-1
glucose-catabolic-process:5	-1	-1	-1	-1	-1	-1	-1	-1	5
glucose-metabolic-process:5	-1	-1	-1	-1	-1	-1	5	-1	-1
glycerol-ether-metabolic-process:5	-1	-1	-1	-1	5	-1	5	-1	-1
glycerolipid-catabolic-process:5	5	-1	-1	-1	-1	-1	5	-1	-1
glycerolipid-metabolic-process:5	-1	-1	-1	-1	-1	-1	5	-1	-1
glycerophospholipid-metabolic-process:5	-1	-1	-1	-1	-1	-1	5	-1	-1
growth:5	-1	-1	-1	-1	-1	-1	-1	5	-1
growth-of-unicellular-organism-as-a-thread-of-attached-cells:5	-1	-1	-1	-1	-1	-1	-1	5	-1
heterocycle-biosynthetic-process:5	-1	-1	5	-1	-1	-1	5	-1	-1
heterocycle-metabolic-process:5	-1	-1	-1	-1	-1	-1	5	-1	-1
hexose-transport:5	-1	5	5	5	5	5	-1	-1	-1
histone-acetylation:5	-1	-1	-1	5	-1	-1	-1	5	-1
histone-deacetylation:5	-1	-1	-1	5	-1	-1	-1	-1	-1
histone-exchange:5	-1	-1	-1	-1	-1	-1	-1	5	-1
histone-modification:5	-1	-1	-1	5	-1	-1	-1	5	-1
hydrogen-transport:5	5	5	5	-1	-1	-1	-1	-1	-1
inactivation-of-MAPK-activity:5	-1	-1	-1	-1	-1	5	-1	-1	-1
inner-mitochondrial-membrane-organization:5	-1	5	-1	-1	-1	-1	-1	-1	-1
internal-peptidyl-lysine-acetylation:5	-1	-1	-1	5	-1	-1	-1	5	-1
internal-protein-amino-acid-acetylation:5	-1	-1	-1	5	-1	-1	-1	5	-1
intra-Golgi-vesicle-mediated-transport:5	-1	-1	-1	-1	-1	-1	-1	5	-1
intracellular-pH-reduction:5	-1	5	-1	-1	-1	-1	-1	-1	-1
intracellular-protein-kinase-cascade:5	-1	-1	-1	5	-1	5	-1	-1	-1
intracellular-protein-transport:5	-1	5	-1	5	-1	-1	-1	5	-1
intracellular-signal-transduction:5	-1	-1	-1	5	-1	-1	-1	5	-1
intracellular-transport:5	-1	5	-1	5	-1	-1	-1	5	-1
invasive-growth-in-response-to-glucose-limitation:5	-1	-1	-1	-1	-1	-1	-1	5	-1
ion-transmembrane-transport:5	-1	5	5	-1	-1	-1	-1	-1	-1
ion-transport:5	-1	5	-1	-1	-1	-1	-1	-1	-1
iron-ion-homeostasis:5	-1	-1	5	-1	5	-1	-1	-1	-1
iron-sulfur-cluster-assembly:5	-1	5	5	-1	5	-1	-1	-1	-1
late-endosome-to-vacuole-transport:5	5	-1	5	-1	5	-1	-1	5	-1
late-endosome-to-vacuole-transport-via-multivesicular-body-sorting-pathway:5	-1	-1	5	-1	5	-1	-1	5	-1
lipid-catabolic-process:5	-1	-1	-1	-1	5	-1	5	-1	-1
lipid-localization:5	-1	-1	-1	-1	-1	-1	-1	5	-1
lipid-modification:5	-1	-1	-1	-1	5	-1	5	-1	-1
lipid-oxidation:5	-1	-1	-1	-1	-1	-1	5	-1	-1
lipid-transport:5	-1	-1	-1	-1	-1	-1	-1	5	-1
localization:5	5	5	5	5	5	5	-1	5	-1
macroautophagy:5	-1	5	-1	-1	-1	-1	-1	5	-1
macromolecule-catabolic-process:5	5	5	5	-1	5	5	5	-1	5
macromolecule-localization:5	-1	5	-1	5	-1	-1	-1	5	-1
macromolecule-modification:5	-1	-1	-1	-1	-1	5	5	5	-1
maintenance-of-location:5	-1	-1	5	-1	5	-1	-1	-1	-1
maintenance-of-location-in-cell:5	-1	-1	5	-1	5	-1	-1	-1	-1
maintenance-of-protein-location:5	-1	-1	5	-1	5	-1	-1	-1	-1
maintenance-of-protein-location-in-cell:5	-1	-1	5	-1	5	-1	-1	-1	-1
mating-type-switching:5	-1	-1	-1	5	-1	-1	-1	-1	-1
meiosis:5	-1	-1	-1	5	-1	-1	-1	-1	-1
meiotic-cell-cycle:5	-1	-1	-1	5	-1	-1	-1	-1	-1
membrane-budding:5	-1	5	5	-1	-1	-1	-1	5	-1
membrane-docking:5	-1	5	-1	5	-1	-1	-1	5	-1
membrane-fusion:5	-1	5	-1	5	5	-1	-1	5	-1
membrane-invagination:5	5	5	5	5	5	-1	-1	5	-1
membrane-organization:5	5	5	5	5	5	-1	-1	5	-1
metallo-sulfur-cluster-assembly:5	-1	5	5	-1	5	-1	-1	-1	-1
metaphase-plate-congression:5	-1	-1	-1	5	-1	-1	-1	-1	-1
microautophagy:5	-1	5	-1	-1	-1	-1	5	-1	-1
microtubule-based-process:5	-1	-1	-1	5	-1	-1	-1	-1	-1
microtubule-cytoskeleton-organization:5	-1	-1	-1	5	-1	-1	-1	-1	-1
mitochondrial-ATP-synthesis-coupled-electron-transport:5	5	-1	5	-1	5	-1	-1	-1	-1
mitochondrial-RNA-metabolic-process:5	5	5	-1	-1	-1	-1	-1	-1	-1
mitochondrial-electron-transport,-cytochrome-c-to-oxygen:5	5	-1	5	-1	5	-1	-1	-1	-1
mitochondrial-electron-transport,-ubiquinol-to-cytochrome-c:5	5	5	5	-1	5	-1	-1	-1	-1
mitochondrial-membrane-organization:5	-1	5	-1	-1	-1	-1	-1	-1	-1
mitochondrial-respiratory-chain-complex-III-assembly:5	-1	-1	5	-1	5	-1	-1	-1	-1
mitochondrial-respiratory-chain-complex-III-biogenesis:5	-1	-1	5	-1	5	-1	-1	-1	-1
mitochondrial-respiratory-chain-complex-IV-assembly:5	5	-1	5	-1	5	-1	-1	-1	-1
mitochondrial-respiratory-chain-complex-IV-biogenesis:5	5	5	5	-1	5	-1	-1	-1	-1
mitochondrial-respiratory-chain-complex-assembly:5	5	5	5	-1	5	-1	-1	-1	-1
mitochondrial-translation:5	5	5	5	-1	-1	-1	-1	-1	-1
mitochondrion-distribution:5	5	5	5	-1	5	-1	-1	5	-1
mitochondrion-inheritance:5	5	5	5	-1	5	-1	-1	5	-1
mitochondrion-localization:5	5	5	5	-1	5	-1	-1	5	-1
mitochondrion-organization:5	5	5	5	-1	5	-1	-1	-1	-1
mitosis:5	-1	-1	-1	5	-1	-1	-1	-1	-1
mitotic-cell-cycle:5	-1	-1	-1	5	-1	-1	-1	-1	-1
mitotic-metaphase-plate-congression:5	-1	-1	-1	5	-1	-1	-1	-1	-1
mitotic-metaphase/anaphase-transition:5	-1	-1	-1	-1	-1	-1	-1	5	-1
mitotic-recombination:5	-1	-1	5	-1	5	-1	-1	-1	-1
mitotic-sister-chromatid-cohesion:5	-1	-1	-1	5	-1	-1	-1	-1	-1
mitotic-sister-chromatid-segregation:5	-1	-1	-1	5	-1	-1	-1	-1	-1
modification-dependent-macromolecule-catabolic-process:5	5	5	5	-1	5	5	5	-1	5
modification-dependent-protein-catabolic-process:5	5	5	5	-1	5	5	5	5	5
monocarboxylic-acid-metabolic-process:5	-1	5	-1	-1	-1	-1	-1	-1	-1
monosaccharide-transport:5	-1	5	5	5	5	5	-1	-1	-1
monovalent-inorganic-cation-homeostasis:5	-1	5	-1	-1	-1	-1	-1	-1	-1
monovalent-inorganic-cation-transport:5	-1	5	5	-1	-1	-1	-1	-1	-1
multi-organism-process:5	-1	-1	-1	-1	-1	-1	-1	5	-1
negative-regulation-of-MAP-kinase-activity:5	-1	-1	-1	-1	-1	5	-1	-1	-1
negative-regulation-of-actin-filament-polymerization:5	-1	-1	-1	5	-1	-1	-1	-1	-1
negative-regulation-of-biological-process:5	-1	-1	-1	5	-1	-1	-1	-1	-1
negative-regulation-of-carbohydrate-metabolic-process:5	-1	-1	-1	-1	-1	-1	5	-1	5
negative-regulation-of-cell-communication:5	-1	-1	-1	-1	-1	5	-1	-1	-1
negative-regulation-of-cellular-carbohydrate-metabolic-process:5	-1	-1	-1	-1	-1	-1	5	-1	5
negative-regulation-of-cellular-process:5	-1	-1	-1	5	-1	-1	-1	-1	-1
negative-regulation-of-chromatin-silencing:5	-1	-1	-1	5	-1	-1	-1	-1	-1
negative-regulation-of-chromatin-silencing-at-telomere:5	-1	-1	-1	5	-1	-1	-1	-1	-1
negative-regulation-of-cytoskeleton-organization:5	-1	-1	-1	5	-1	-1	-1	-1	-1
negative-regulation-of-gene-silencing:5	-1	-1	-1	5	-1	-1	-1	-1	-1
negative-regulation-of-gluconeogenesis:5	-1	-1	-1	-1	-1	-1	5	-1	5
negative-regulation-of-protein-complex-disassembly:5	-1	-1	-1	5	-1	-1	-1	-1	-1
negative-regulation-of-protein-polymerization:5	-1	-1	-1	5	-1	-1	-1	-1	-1
negative-regulation-of-protein-serine/threonine-kinase-activity:5	-1	-1	-1	-1	-1	5	-1	-1	-1
negative-regulation-of-signal-transduction:5	-1	-1	-1	-1	-1	5	-1	-1	-1
negative-regulation-of-signaling:5	-1	-1	-1	-1	-1	5	-1	-1	-1
neutral-lipid-metabolic-process:5	-1	-1	-1	-1	-1	-1	5	-1	-1
nicotinamide-nucleotide-metabolic-process:5	-1	-1	-1	-1	-1	-1	5	-1	5
non-recombinational-repair:5	-1	-1	-1	5	-1	-1	-1	-1	-1
nuclear-division:5	-1	-1	-1	5	-1	-1	-1	-1	-1
nucleoside-triphosphate-biosynthetic-process:5	-1	-1	5	-1	-1	-1	-1	-1	-1
nucleoside-triphosphate-metabolic-process:5	5	-1	5	-1	-1	-1	-1	-1	-1
nucleotide-excision-repair:5	-1	-1	-1	5	-1	5	-1	-1	-1
organelle-fission:5	-1	-1	-1	5	-1	-1	-1	-1	-1
organelle-fusion:5	-1	-1	-1	5	-1	-1	-1	5	-1
organelle-inheritance:5	5	-1	5	5	5	-1	-1	5	-1
organelle-localization:5	-1	-1	-1	-1	-1	-1	-1	5	-1
organelle-organization:5	-1	5	-1	5	-1	-1	-1	5	-1
organic-ether-metabolic-process:5	-1	-1	-1	-1	5	-1	5	-1	-1
organic-substance-transport:5	-1	-1	5	5	5	5	-1	-1	-1
osmosensory-signaling-pathway:5	5	-1	5	5	-1	-1	-1	-1	-1
oxidation-reduction-process:5	-1	-1	5	-1	5	-1	-1	-1	-1
oxidative-phosphorylation:5	5	-1	5	-1	5	-1	-1	-1	-1
oxidoreduction-coenzyme-metabolic-process:5	-1	-1	-1	-1	-1	-1	5	-1	5
pH-reduction:5	-1	5	-1	-1	-1	-1	-1	-1	-1
pentose-phosphate-shunt:5	-1	-1	-1	-1	-1	-1	5	-1	5
peptidyl-lysine-acetylation:5	-1	-1	-1	5	-1	-1	-1	5	-1
peptidyl-lysine-modification:5	-1	-1	-1	-1	-1	-1	-1	5	-1
peroxisomal-transport:5	-1	5	5	-1	-1	-1	-1	-1	5
peroxisome-degradation:5	-1	-1	-1	5	-1	-1	-1	-1	-1
peroxisome-organization:5	-1	5	5	5	5	5	-1	5	-1
phosphate-metabolic-process:5	-1	-1	-1	-1	-1	5	-1	5	-1
phosphatidylinositol-dephosphorylation:5	5	-1	-1	-1	-1	-1	5	-1	-1
phosphatidylinositol-metabolic-process:5	-1	-1	-1	-1	-1	-1	5	-1	-1
phospholipid-dephosphorylation:5	5	-1	-1	-1	-1	-1	5	-1	-1
phospholipid-transport:5	-1	-1	-1	-1	-1	-1	-1	5	-1
phosphorus-metabolic-process:5	-1	-1	-1	-1	-1	5	-1	5	-1
phosphorylation:5	-1	-1	-1	-1	-1	5	-1	5	-1
piecemeal-microautophagy-of-nucleus:5	-1	5	-1	-1	-1	-1	5	-1	-1
polysaccharide-biosynthetic-process:5	-1	-1	5	-1	-1	-1	-1	-1	-1
polysaccharide-metabolic-process:5	5	-1	5	-1	-1	-1	-1	-1	-1
positive-regulation-of-GTPase-activity:5	-1	-1	-1	5	-1	-1	-1	5	-1
positive-regulation-of-RNA-polymerase-II-transcriptional-preinitiation-complex-assembly:5	5	-1	-1	-1	-1	-1	-1	-1	-1
positive-regulation-of-catalytic-activity:5	5	-1	-1	5	-1	-1	-1	5	-1
positive-regulation-of-cellular-component-organization:5	5	-1	5	-1	5	-1	-1	-1	-1
positive-regulation-of-cytoskeleton-organization:5	-1	-1	-1	5	-1	-1	-1	-1	-1
positive-regulation-of-gene-expression,-epigenetic:5	-1	-1	-1	5	-1	-1	-1	-1	-1
positive-regulation-of-hydrolase-activity:5	-1	-1	-1	5	-1	-1	-1	5	-1
positive-regulation-of-kinase-activity:5	-1	-1	5	5	5	-1	-1	5	-1
positive-regulation-of-lipid-metabolic-process:5	-1	-1	-1	5	-1	-1	-1	-1	-1
positive-regulation-of-mitochondrial-translation:5	-1	5	5	-1	5	-1	-1	-1	-1
positive-regulation-of-mitochondrion-organization:5	-1	5	5	-1	5	-1	-1	-1	-1
positive-regulation-of-molecular-function:5	5	-1	-1	5	-1	-1	-1	5	-1
positive-regulation-of-protein-kinase-activity:5	-1	-1	5	5	5	-1	-1	5	-1
positive-regulation-of-signal-transduction:5	-1	-1	-1	-1	-1	-1	-1	5	-1
positive-regulation-of-signaling:5	-1	-1	-1	-1	-1	-1	-1	5	-1
positive-regulation-of-transcription-by-galactose:5	-1	-1	-1	-1	-1	-1	-1	5	-1
positive-regulation-of-transferase-activity:5	-1	-1	5	5	5	-1	-1	5	-1
post-Golgi-vesicle-mediated-transport:5	-1	5	-1	5	5	-1	-1	5	-1
post-translational-protein-modification:5	-1	5	-1	5	-1	-1	5	-1	5
proteasomal-protein-catabolic-process:5	5	5	5	-1	5	5	5	5	5
proteasomal-ubiquitin-dependent-protein-catabolic-process:5	5	5	5	-1	5	5	5	5	5
proteasomal-ubiquitin-independent-protein-catabolic-process:5	5	5	5	-1	5	-1	5	-1	5
proteasome-assembly:5	5	5	5	-1	5	-1	5	-1	5
proteasome-regulatory-particle-assembly:5	5	5	-1	-1	-1	-1	-1	-1	5
protein-acetylation:5	-1	-1	-1	-1	-1	-1	-1	5	-1
protein-acylation:5	-1	-1	-1	-1	-1	-1	-1	5	-1
protein-catabolic-process:5	5	5	5	-1	5	5	5	5	5
protein-complex-assembly:5	5	5	5	-1	5	-1	5	-1	5
protein-complex-biogenesis:5	5	5	5	-1	5	-1	5	-1	5
protein-complex-subunit-organization:5	5	5	5	-1	5	-1	5	-1	5
protein-deacetylation:5	-1	-1	-1	5	-1	-1	-1	-1	-1
protein-deacylation:5	-1	-1	-1	5	-1	-1	-1	-1	-1
protein-deubiquitination:5	-1	-1	-1	-1	-1	-1	5	-1	5
protein-import-into-peroxisome-matrix:5	-1	-1	5	-1	-1	-1	-1	-1	5
protein-localization:5	-1	5	5	5	5	5	-1	5	-1
protein-localization-in-Golgi-apparatus:5	-1	5	5	-1	5	5	-1	-1	-1
protein-localization-in-endoplasmic-reticulum:5	-1	-1	-1	-1	-1	-1	-1	5	-1
protein-localization-in-mitochondrion:5	-1	5	-1	-1	-1	-1	-1	-1	-1
protein-localization-to-organelle:5	-1	5	-1	5	-1	-1	-1	5	-1
protein-localization-to-peroxisome:5	-1	5	5	-1	-1	-1	-1	-1	5
protein-localization-to-vacuole:5	5	5	5	5	5	5	-1	5	-1
protein-maturation-by-peptide-bond-cleavage:5	-1	-1	-1	-1	-1	-1	-1	5	-1
protein-metabolic-process:5	5	5	-1	-1	-1	-1	5	-1	5
protein-modification-by-small-protein-conjugation:5	-1	-1	-1	-1	-1	-1	5	5	5
protein-modification-by-small-protein-conjugation-or-removal:5	5	5	5	-1	5	5	5	5	5
protein-modification-by-small-protein-removal:5	5	-1	5	-1	5	-1	5	-1	-1
protein-modification-process:5	-1	-1	-1	5	-1	5	5	5	5
protein-monoubiquitination:5	-1	-1	-1	-1	-1	-1	5	-1	5
protein-palmitoylation:5	-1	5	-1	-1	-1	-1	-1	-1	-1
protein-phosphorylation:5	-1	-1	-1	5	-1	5	-1	5	5
protein-polyubiquitination:5	-1	-1	-1	-1	-1	-1	5	-1	5
protein-processing:5	-1	-1	-1	-1	-1	-1	-1	5	-1
protein-retention-in-Golgi-apparatus:5	5	5	5	-1	5	5	-1	-1	-1
protein-secretion:5	5	-1	-1	-1	-1	-1	-1	-1	-1
protein-targeting:5	-1	5	-1	5	-1	-1	-1	5	-1
protein-targeting-to-peroxisome:5	-1	5	5	-1	-1	-1	-1	-1	5
protein-targeting-to-vacuole:5	5	5	5	5	5	5	-1	5	-1
protein-targeting-to-vacuole-involved-in-ubiquitin-dependent-protein-catabolic-process-via-the-multivesicular-body-sorting-pathway:5	-1	-1	-1	-1	-1	-1	-1	5	-1
protein-transport:5	-1	5	-1	5	-1	5	-1	5	-1
protein-ubiquitination:5	-1	-1	-1	-1	-1	-1	5	5	5
proteolysis:5	5	5	5	-1	5	5	5	5	5
proteolysis-involved-in-cellular-protein-catabolic-process:5	5	5	5	-1	5	5	5	5	5
proton-transport:5	5	5	5	-1	-1	-1	-1	-1	-1
pseudohyphal-growth:5	-1	-1	-1	-1	-1	-1	-1	5	-1
purine-nucleoside-triphosphate-biosynthetic-process:5	-1	-1	5	-1	-1	-1	-1	-1	-1
purine-nucleoside-triphosphate-metabolic-process:5	5	-1	5	-1	-1	-1	-1	-1	-1
purine-nucleotide-metabolic-process:5	5	-1	-1	-1	-1	-1	-1	-1	-1
purine-ribonucleoside-triphosphate-biosynthetic-process:5	-1	-1	5	-1	-1	-1	-1	-1	-1
purine-ribonucleoside-triphosphate-metabolic-process:5	5	-1	5	-1	-1	-1	-1	-1	-1
purine-ribonucleotide-metabolic-process:5	5	-1	-1	-1	-1	-1	-1	-1	-1
[truncated: 746 more rows]

## Sheet: Supp Table 4
Supplementary Table 6
Ancestral ESR				Lists in Supplementary Fig 11			Mobile and Stationary genes
Most Highly repressed	Highly repressed	Highly induced	Most Highly induced
Module 1	Module 2	Module 6	Module 7	Mitochondrion organization	response to stimulus		Heat mobile	Heat stationary	Carbon mobile	Carbon stationary
YAL024C	Q0140	YER037W	YOR163W	YMR282C	YFL039C		YJL062W	YOL010W	YMR036C	YER127W
YAL059W	Q0275	YKL073W	YOR377W	YPL005W	YDR085C		YMR189W	YPR143W	YKL004W	YNR046W
YBL004W	YAL003W	YDR518W	YLR259C	YOR335C	YNR044W		YGL125W	YGL171W	YPR048W	YDL031W
YBL024W	YAL012W	YGL058W	YOR226C	YHR011W	YMR092C		YDL126C	YKL078W	YLR315W	YBR289W
YBL028C	YAL015C	YGR205W	YLL019C	YBR121C	YML086C		YDR071C	YOR310C	YJR024C	YNL308C
YBL029W	YAL017W	YGR135W	YJL101C	YPR081C	YKL114C		YJR085C	YDL097C	YMR116C	YDR086C
YBL035C	YAL018C	YFR053C	YDR044W	YPR033C	YOR094W		YLL013C	YCL054W	YEL046C	YKR056W
YBL039C	YAL019W	YPR107C	YJR104C	YOL023W	YBR164C		YER007W	YAL025C	YNR036C	YHR170W
YBL054W	YAL028W	YGL183C	YDL209C	YCR046C	YPL051W		YFR003C	YLL008W	YDR064W	YJR041C
YBL081W	YAL029C	YER046W	YNR002C	YCR071C	YPR201W		YMR116C	YPR148C	YMR200W	YKL078W
YBR017C	YAL033W	YFL060C	YBL033C	YPL040C	YLR242C		YIL061C	YIL041W	YJL003W	YOR310C
YBR030W	YAL035W	YCR068W	YHL022C	YLR069C	YJL115W		YEL046C	YDR083W	YLR454W	YDL097C
YBR061C	YAL036C	YGL125W	YDR147W	YGL143C	YGR097W		YCR044C	YOR119C	YPR117W	YNL113W
YBR065C	YAL039C	YMR137C	YHL024W	YGR084C	YPR093C		YDL119C	YNL132W	YFL017C	YCL054W
YBR071W	YAL047C	YKR070W	YNL010W	YKL003C	YGL180W		YML126C	YDL060W	YDL219W	YAL025C
YBR141C	YAR002W	YFL053W	YGL156W	YPR166C	YLL042C		YEL038W	YLR291C	YCR059C	YLL008W
YBR142W	YAR008W	YGL047W	YNL134C	YDR405W	YBR217W		YER095W	YDR299W	YDR208W	YDR083W
YBR155W	YBL009W	YNR018W	YML054C	YBL090W	YPR185W		YDR064W	YMR128W	YGR181W	YOR119C
YBR158W	YBL014C	YDL126C	YEL007W	YHL004W	YBR128C		YKR083C	YKL172W	YGL012W	YNR016C
YBR162C	YBL015W	YDR100W	YDR019C	YKL167C	YMR159C		YOL110W	YDR398W	YPL252C	YMR207C
YBR192W	YBL023C	YBR287W	YNL279W	YPL118W	YLR423C		YDL171C	YHR196W	YER141W	YJR064W
YBR247C	YBL025W	YPL214C	YJR008W	YNL005C	YNL242W		YLR454W	YMR001C	YNR074C	YHR166C
YBR257W	YBL026W	YDL115C	YMR186W	YDR116C	YDL113C		YPR117W	YOR031W	YGR029W	YDL051W
YBR267W	YBL027W	YKL133C	YDL124W	YNL284C	YPL100W		YLR138W	YDL232W	YOL147C	YNL132W
YCL037C	YBL038W	YCL039W	YKR049C	YDL202W	YJL178C		YIL110W	YHR088W	YDL235C	YML093W
YCL054W	YBL046W	YJR100C	YKL001C	YKR006C	YPL166W		YHR201C	YNR053C	YBR086C	YDR299W
YCL059C	YBL055C	YBL058W	YDR090C	YBL038W	YNR007C		YCR059C	YGL099W	YMR302C	YIL031W
YCL061C	YBL057C	YLR299W	YOR003W	YNL252C	YNL223W		YIR023W	YCR017C	YKL060C	YMR128W
YCL063W	YBL059W	YFR014C	YOR110W	YNL185C	YHR171W		YHR026W	YOR056C	YGL215W	YGR159C
YCR016W	YBL072C	YGR268C	YBR026C	YKR085C	YBL078C		YDR523C	YPR137W	YLR075W	YJL125C
YCR047C	YBL076C	YIL108W	YBL060W	YNL177C	YDL149W		YBL102W	YER082C	YLR418C	YKL172W
YCR057C	YBL079W	YJL155C	YFL014W	YOR150W	YOL078W		YGL154C	YDR211W	YKL191W	YDR398W
YCR072C	YBL087C	YOR223W	YMR101C	YMR193W	YMR068W		YGR132C	YKR081C	YDR332W	YHR196W
YDL014W	YBL090W	YML007W	YNL202W	YGR076C	YOR113W		YFL028C	YNL248C	YKL084W	YGL043W
YDL031W	YBL091C	YER069W	YLL046C	YBR282W	YOR134W		YNR074C	YIL017C	YPL213W	YJR002W
YDL060W	YBL099W	YJL088W	YPL111W	YDR462W	YJL095W		YER038C	YMR290C	YGL080W	YGL195W
YDL112W	YBR003W	YPR061C	YMR319C	YMR024W	YIL033C		YLR193C	YDR062W	YDL198C	YDR228C
YDL148C	YBR028C	YPR167C	YOR052C	YKL138C	YER155C		YPL111W	YOR145C	YMR282C	YCR005C
YDL150W	YBR029C	YMR002W	YKL086W	YCR003W	YPL115C		YJR046W	YOR361C	YOL064C	YNR001C
YDL153C	YBR039W	YGR232W	YDR185C	YMR286W	YPL161C		YKL047W	YDR060W	YDL125C	YIL048W
YDL167C	YBR045C	YDL183C	YKR071C	YDR322W	YBR270C		YFR005C	YOR272W	YOR258W	YOR031W
YDL175C	YBR048W	YCR079W	YNL064C	YBR122C	YJL058C		YMR108W	YBR034C	YLR172C	YJL060W
YDL205C	YBR049C	YKL193C	YMR139W	YBR268W	YNL042W		YKL106W	YDL230W	YOR126C	YOL093W
YDL208W	YBR079C	YPR103W	YJR010W	YKL170W	YCR032W		YDL235C	YMR146C	YJL031C	YPR103W
YDL213C	YBR088C	YPR049C	YJR096W	YML009C	YPL084W		YBR086C	YPL217C	YCL052C	YNR053C
YDR021W	YBR091C	YDR306C	YNL006W	YLR439W	YBR290W		YMR302C	YOL077C	YNL110C	YKR083C
YDR045C	YBR094W	YKR083C	YDR247W	YPL173W	YLR319C		YNL152W	YGR245C	YPR201W	YGL099W
YDR060W	YBR104W	YOR081C	YKL060C	YMR225C	YLR226W		YNL094W	YMR093W	YEL001C	YKL143W
YDR065W	YBR115C	YFL044C	YDR168W	YJL096W	YHR114W		YKL060C	YNL330C	YGL045W	YEL031W
YDR073W	YBR120C	YOR289W	YLR163C	YNR022C	YKL088W		YGL023C	YLL039C	YLR422W	YLR336C
YDR083W	YBR122C	YIR038C	YDR214W	YPR100W	YML102W		YDR260C	YDR365C	YDL086W	YOR056C
YDR087C	YBR130C	YMR262W	YOL032W	YHR147C	YNL161W		YML008C	YEL020C	YPL277C	YPR137W
YDR091C	YBR133C	YHR008C	YHR037W	YDR237W	YBR131W		YDR511W	YPL093W	YOR389W	YCR047C
YDR101C	YBR143C	YLR151C	YHR005C	YJL063C	YDR168W		YKR080W	YLR129W	YFL061W	YOR048C
YDR120C	YBR146W	YFR010W	YML128C	YNR036C	YCR093W		YOL116W	YGL111W	YNL335W	YDR465C
YDR156W	YBR151W	YLR351C	YPL225W	YPL013C	YGL155W		YPL128C	YNL119W	YCR023C	YER082C
YDR161W	YBR154C	YOR117W	YDR258C	YMR188C	YLR103C		YGL181W	YDR087C	YBL029W	YOR117W
YDR165W	YBR172C	YDR335W	YDR003W	YNL306W	YDL126C		YMR097C	YPL259C	YPR068C	YOL041C
YDR184C	YBR176W	YOR124C	YER053C	YDR337W	YDL017W		YMR117C	YLL011W	YPL018W	YDR211W
YDR194C	YBR181C	YGL010W	YBR056W	YGR165W	YBR274W		YAL044C	YOR243C	YGR126W	YMR217W
YDR249C	YBR185C	YDR323C	YCR061W	YBR251W	YOR028C		YOR281C	YJL069C	YDL129W	YJR008W
YDR257C	YBR187W	YOR007C	YIL072W	YMR158W	YFR014C		YGL067W	YOR294W	YGR035C	YKR009C
YDR299W	YBR191W	YDL100C	YLR136C	YBR146W	YOL016C		YPR017C	YMR131C	YNR069C	YKR081C
YDR321W	YBR195C	YNL200C	YLL026W	YPL104W	YER157W		YKR030W	YNL281W	YIL024C	YNL248C
YDR324C	YBR242W	YCR076C	YNL036W	YOL033W	YNL027W		YKL191W	YDR214W	YDR520C	YKR049C
YDR339C	YBR248C	YLR245C	YBL078C	YPR047W	YMR025W		YGL136C	YLR196W	YKR043C	YMR290C
YDR365C	YBR249C	YOR285W	YHR087W	YNL073W	YMR048W		YKL049C	YKR024C	YJR107W	YOR145C
YDR397C	YBR251W	YKR009C	YBR101C	YKL194C	YDR179C		YNR033W	YGL120C	YCR045C	YJL033W
YDR399W	YBR252W	YOR347C	YNR007C	YDR268W	YLR394W		YMR024W	YMR049C	YHL009C	YJR070C
YDR412W	YBR261C	YIR032C	YDL022W	YPL097W	YMR078C		YGL203C	YPL043W	YNR063W	YPL146C
YDR449C	YBR263W	YDR066C	YNL277W	YMR097C	YPR135W		YFR027W	YDR258C	YMR070W	YMR014W
YDR451C	YBR268W	YIL017C	YOR303W	YLR382C	YKL139W		YDR419W	YPL266W	YOR273C	YDR060W
YDR454C	YBR271W	YPL170W	YDR353W	YNL137C	YJL005W		YOL107W	YDL063C		YNL313C
YDR465C	YBR275C	YCL047C	YCL069W	YOR158W	YCL016C		YOL054W	YNL207W		YLR074C
YDR478W	YBR282W	YIR029W	YBR020W	YHR038W	YPL194W		YOR246C	YLR396C		YPL012W
YDR496C	YBR283C	YDR523C	YLR109W	YDR041W	YDL160C		YLL014W	YNL124W		YPL126W
YEL026W	YBR291C	YLR263W	YBR118W	YER050C	YPL049C		YOL008W	YIL078W		YBL015W
YEL064C	YCL017C	YOR157C	YDR374C	YNR037C	YDR480W		YMR069W	YOL013C		YOR272W
YER002W	YCL031C	YER042W	YFL016C	YGL129C	YHR164C		YLR218C	YGL078C		YBL079W
YER006W	YCR003W	YDL072C	YOR020C	YDR175C	YOR005C		YOL064C	YDL153C		YER105C
YER036C	YCR005C	YIR011C	YDR242W	YIL093C	YKL213C		YKL209C	YLR002C		YBL025W
YER039C	YCR017C	YBR035C	YOR027W	YGR215W	YIL010W		YNL240C	YLL026W		YAL008W
YER077C	YCR035C	YGR223C	YDL215C	YJR113C	YDR294C		YER026C	YNL061W		YGR187C
YER082C	YCR043C	YHL030W	YNL015W	YCR024C	YPR017C		YOR258W	YDR324C		YLR377C
YER110C	YCR046C	YPL152W	YMR251W	YLR139C	YDL101C		YKR069W	YGR103W		YOR036W
YER126C	YCR051W	YBL041W	YAL062W	YNL081C	YPR023C		YJR074W	YBR247C		YPL217C
YER127W	YCR060W	YPL222W	YGL184C	YOR187W	YEL018W		YGL030W	YHR087W		YOL077C
YER156C	YCR071C	YNL223W	YKL209C	YDR115W	YJR082C		YOR369C	YJL109C		YDL143W
YFL001W	YCR073C	YMR038C	YAL054C	YML025C	YNL136W		YNL229C	YDR101C		YIL106W
YFL002C	YCR084C	YDL200C	YNL240C		YLR228C		YBL105C	YDR487C		YKL082C
YFL034C-A	YCR086W	YAL008W	YML130C		YJL201W		YBR187W	YPR144C		YDL145C
YFL036W	YCR092C	YKL152C	YBR046C		YLR299W		YLR304C	YBR196C		YOR216C
YFR001W	YDL040C	YIL007C	YLR142W		YFR027W		YPR201W	YER006W		YKR002W
YGL028C	YDL044C	YLR193C	YHR210C		YGL222C		YNL191W	YMR214W		YLR197W
YGL029W	YDL047W	YPL206C	YDR256C		YER035W		YEL001C	YER110C		YLL039C
YGL063W	YDL051W	YLR251W	YAL034C		YBL047C		YJL055W	YDR449C		YDR365C
YGL078C	YDL061C	YDR074W	YML131W		YOR144C		YFR034C	YPR110C		YLR115W
YGL099W	YDL069C	YNL063W	YCR098C		YOR244W		YBR276C	YPL211W		YPL183C
YGL111W	YDL074C	YHR029C	YGR254W		YHL010C		YKR022C	YFL016C		YDL007W
YGL120C	YDL076C	YDR400W	YLR043C		YDL166C		YMR034C	YKL179C		YJL071W
YGL136C	YDL081C	YGR133W	YOR348C		YJL157C		YPL277C	YLR409C		YPL093W
YGL169W	YDL082W	YBR001C	YLR411W		YLR238W		YOR389W	YMR229C		YJL124C
YGL171W	YDL083C	YNL242W	YPL054W		YMR052W		YCR023C	YKL021C		YLR129W
YGL209W	YDL106C	YIL010W	YGR201C		YFR008W		YBL029W	YGL112C		YPR056W
YGL211W	YDL111C	YNL274C	YDR513W		YMR029C		YPL014W	YLR222C		YGR283C
YGR030C	YDL116W	YPR108W	YMR315W		YCR089W		YMR258C	YOR020C		YMR310C
YGR079W	YDL117W	YLR303W	YLR092W		YGL220W		YLR404W	YOR027W		YGL111W
YGR081C	YDL121C	YBR042C	YPL280W		YOR324C		YHR083W	YNL015W		YDR176W
YGR090W	YDL122W	YHR140W	YKR097W		YAL028W		YLR227C	YCR072C		YJL148W
YGR091W	YDL128W	YGR136W	YPR201W		YBL016W		YDR310C	YDR165W		YPR163C
YGR093W	YDL136W	YGR038W	YLR327C		YNL133C		YPL267W	YNL007C		YDR087C
YGR095C	YDL141W	YCL033C	YOR178C		YPL248C		YMR144W	YPR189W		YLL034C
YGR103W	YDL166C	YGL011C	YPL166W		YFL021W		YDR065W	YLR276C		YLL011W
YGR128C	YDL198C	YDL007W	YEL011W		YPL075W		YLR052W	YDR496C		YJL014W
YGR145W	YDL201W	YKL064W	YLR258W		YPL110C		YJR094C	YLR327C		YLR071C
YGR150C	YDL202W	YJL106W	YJL153C		YJR031C		YIL040W	YGR008C		YPR010C
YGR159C	YDL240W	YIL087C	YLR446W		YEL022W		YOL007C	YFR001W		YJL069C
YGR169C	YDR012W	YPL091W	YOR386W		YAL048C		YML050W	YOR252W		YOR294W
YGR187C	YDR013W	YML118W	YIR031C		YDL100C		YJL162C	YLR073C		YGL048C
YGR200C	YDR014W	YBR280C	YMR253C		YPL091W		YJR001W	YBL098W		YKR092C
YGR234W	YDR020C	YHR176W	YGL114W		YHR183W		YJR107W	YAL059W		YMR131C
YGR245C	YDR023W	YDR273W	YMR250W		YGR256W		YKL222C	YMR250W		YLR196W
YGR251W	YDR031W	YGR052W	YPR026W		YER020W		YOR162C	YJR012C		YKR024C
YGR280C	YDR037W	YCL018W	YPL087W		YOR371C		YOL132W	YCR016W		YGL120C
YGR283C	YDR041W	YDR255C	YDR124W		YAL056W		YGR288W	YLR221C		YER036C
YHL013C	YDR062W	YBR170C	YPL123C		YHR104W		YJL206C	YDR056C		YEL024W
YHL016C	YDR064W	YIL099W	YKR066C		YJR090C		YLR278C	YGR128C		YDR212W
YHL026C	YDR072C	YOR202W	YJL108C		YDR098C		YDR207C	YOR060C		YBR283C
YHR040W	YDR076W	YIL139C	YDR109C		YER174C		YDR253C	YIL127C		YPL169C
YHR066W	YDR077W	YML004C	YBR203W		YDL010W		YPL038W	YIL057C		YKL137W
YHR069C	YDR096W	YGL037C	YOR047C		YBR014C			YER067W		YBL059C-A
YHR070W	YDR107C	YBR201W	YLR205C		YDR108W			YGR251W		YOR046C
YHR081W	YDR108W	YHR171W	YPL014W		YFL031W			YDR184C		YCL059C
YHR085W	YDR110W	YML095C	YPL229W		YGL237C			YNR014W		YBR142W
YHR088W	YDR115W	YMR105C	YJL066C		YOR358W			YMR206W		YMR049C
YHR089C	YDR116C	YHR027C	YBR230C		YDL223C			YDL169C		YPL043W
YHR143W	YDR119W	YHR075C	YIL057C		YBR248C			YMR081C		YPL266W
YHR148W	YDR127W	YER183C	YPR009W		YOL095C			YKL093W		YBR137W
YHR169W	YDR139C	YDL149W	YIL073C		YOR258W			YPL068C		YDL063C
YHR170W	YDR146C	YOR155C	YGR161C		YLR113W			YJL051W		YJL122W
YHR196W	YDR152W	YJL001W	YBR250W		YDR291W			YEL025C		YNL124W
YHR197W	YDR172W	YIL050W	YNR014W		YLR097C			YJR039W		YJL001W
YIL019W	YDR174W	YIL075C	YDL169C		YBR272C			YER032W		YOR341W
YIL066C	YDR175C	YPL247C	YMR081C		YFR053C			YMR160W		YNL041C
YIL091C	YDR183W	YOL065C	YHR160C		YGL253W			YDL180W		YJL111W
YIL096C	YDR190C	YMR022W	YMR148W		YLR309C			YFR046C		YNL263C
YIL103W	YDR191W	YKL213C	YMR107W		YJR138W			YPR151C		YHR089C
YIL104C	YDR198C	YDR297W	YPL071C		YIL154C			YCR043C		YOL013C
YIL110W	YDR211W	YER052C	YGR250C		YGL150C			YLR267W		YIL075C
YIL123W	YDR223W	YER163C	YJL185C		YLR247C			YKR011C		YGL078C
YIL127C	YDR229W	YCL034W	YFR017C		YMR073C			YHL038C		YDL153C
YIL140W	YDR232W	YLR438W	YMR195W		YHR079C			YIL055C		YDR156W
YIR012W	YDR234W	YBR153W	YHR184W		YER019W			YOR385W		YDR161W
YIR026C	YDR237W	YKL210W	YPR151C		YBR086C			YKR101W		YOL124C
YJL011C	YDR240C	YBR196C	YOL104C		YGL018C			YGR035C		YNL112W
YJL033W	YDR245W	YGR144W	YOR152C		YCL055W			YLR346C		YNL061W
YJL046W	YDR268W	YOR346W	YGL036W		YHR186C			YHR159W		YBL078C
YJL050W	YDR280W	YCR091W	YLR267W		YER038C			YNR069C		YDR324C
YJL051W	YDR286C	YFR052W	YBR047W		YGR040W			YJL151C		YGR103W
YJL069C	YDR289C	YGR048W	YPL201C		YNL239W			YMR111C		YBR247C
YJL109C	YDR296W	YGL126W	YHR136C		YOR181W			YBR067C		YPL218W
YJL122W	YDR307W	YKL145W	YDR070C		YOR171C			YHL021C		YHR087W
YJL125C	YDR316W	YLR064W	YKR011C		YLR260W			YNL002C		YJL109C
YJL130C	YDR322W	YKL119C	YJL149W		YKL073W			YNL077W		YDR101C
YJL148W	YDR329C	YOR245C	YLR341W		YGL090W			YIL164C		YPR144C
YJL194W	YDR331W	YNL241C	YGL170C		YDL240W			YHR138C		YER006W
YJL200C	YDR336W	YLR149C	YDL129W		YOR197W			YCL028W		YLR208W
YJR002W	YDR337W	YKL094W	YOR385W		YIL150C			YBR030W		YER110C
YJR016C	YDR346C	YHR163W	YGR236C		YPR019W			YPR065W		YDL148C
YJR041C	YDR347W	YGR194C	YLR346C		YBR202W			YGL004C		YHR169W
YJR055W	YDR349C	YBR173C	YDR380W		YKL150W			YBL046W		YJR014W
YJR063W	YDR361C	YGR043C	YNR069C		YOL111C			YER040W		YDR449C
YJR070C	YDR363W	YGL180W	YOL136C		YOL064C					YPR110C
YJR132W	YDR364C	YER094C	YBR067C		YIL046W					YDR361C
YKL009W	YDR367W	YDL113C	YDR222W		YNL218W					YJR052W
YKL014C	YDR370C	YDR050C	YHR104W		YDL200C					YKL218C
YKL021C	YDR377W	YLR218C	YOL082W		YOR231W					YPL211W
YKL027W	YDR389W	YPL015C	YNL155W		YPL140C					YPL210C
YKL045W	YDR404C	YPR127W	YHL021C		YNL085W					YKL085W
YKL078W	YDR405W	YGL055W	YKL217W		YMR167W					YMR229C
YKL082C	YDR408C	YKL151C	YNL077W		YPL164C					YKL021C
YKL099C	YDR410C	YMR133W	YLL053C		YPR164W					YLR335W
YKL106W	YDR414C	YOL140W	YAL060W		YGL087C					YKL014C
YKL110C	YDR419W	YNL260C	YHR053C		YLR320W					YER094C
YKL125W	YDR429C	YDL070W	YGR225W		YBR098W					YLR222C
YKL143W	YDR432W	YML092C	YBR208C		YHR204W					YDL215C
YKL144C	YDR438W	YDL125C	YJL137C		YCL061C					YNL015W
YKL172W	YDR439W	YDL244W	YOL126C		YOL090W					YIL111W
YKL181W	YDR440W	YKR069W	YLR179C		YFL003C					YNL052W
YKL185W	YDR441C	YDR394W	YPL088W		YDL154W					YDL040C
YKR024C	YDR452W	YPR093C	YLL060C		YDR097C					YPR127W
YKR025W	YDR462W	YMR278W	YER004W		YMR023C					YML092C
YKR056W	YDR464W	YPR024W	YCR045C		YDR277C					YFR051C
YKR059W	YDR469W	YCR048W	YHR138C		YDR386W					YLR106C
YKR060W	YDR487C	YMR304W	YBR132C		YCL033C					YDR165W
YKR063C	YDR489W	YDR155C	YPL072W		YKL129C					YBR246W
YKR081C	YDR494W	YER142C	YBR149W		YMR109W					YLR276C
YKR092C	YDR511W	YJL020C	YNL194C		YDR162C					YDL130W-A
YKR093W	YDR527W	YIL162W	YIR017C		YLR265C					YDL181W
YLL008W	YDR531W	YGR204W	YDR259C		YDL002C					YER126C
YLL011W	YEL006W	YOR040W	YNL195C		YBR170C					YOR383C
YLL034C	YEL015W	YBR053C	YJL160C		YEL062W					YCR051W
YLL035W	YEL017W	YPL154C	YPR065W		YHL023C					YDR496C
YLR002C	YEL021W	YOR023C	YPL219W		YLR007W					Q0140
YLR003C	YEL024W	YMR114C	YHL008C		YDR288W					YHR078W
YLR009W	YEL032W	YEL009C	YJL089W		YDL105W					YPR098C
YLR016C	YEL036C	YNL011C	YMR291W		YNL091W					YBR053C
YLR051C	YEL038W	YNL191W	YIL136W		YDR001C					YPL154C
YLR059C	YEL042W	YPR002W	YIR018W		YBR001C					YKR097W
YLR063W	YEL043W	YGR127W	YKR013W		YKL057C					YLR327C
YLR068W	YEL046C	YMR191W	YNR044W		YDR192C					YGR008C
YLR073C	YEL050C	YPL116W	YKL107W		YAR002W					YDR289C
YLR074C	YEL052W	YPR160W	YFR032C		YML060W					YFR001W
YLR105C	YEL053C	YNL144C	YIL120W		YHL020C					YGL151W
YLR106C	YEL054C	YLR392C	YMR175W		YPR075C					YGR155W
YLR107W	YEL055C	YFL030W	YDL199C		YGR038W					YJR095W
YLR129W	YEL061C	YLR104W	YOR062C		YLR350W					YPR002W
YLR139C	YEL071W	YOR161C	OG44_1		YPL196W					YOR252W
YLR175W	YER011W	YER010C	OG494_1		YGL094C					YEL011W
YLR180W	YER025W	YGL251C	OG679_1		YKL025C					YLR258W
YLR183C	YER032W	YJR025C	OG1390_1		YJL128C					YFR015C
YLR194C	YER033C	YGL205W	OG1662_1		YGL248W					YLR073C
YLR196W	YER038C	YDL237W	OG1946_1		YOR360C					YPR160W
YLR197W	YER043C	YML042W	OG2115_1		YNL231C					YAL059W
YLR221C	YER049W	YPL067C	OG2397_1		YLR266C					YFL030W
YLR222C	YER050C	YGR141W	OG3372_1		YMR076C					YBR264C
YLR276C	YER057C	YMR110C	OG3619_1		YPL154C					YOR386W
YLR287C	YER072W	YDL057W	OG4030_1		YER037W					YDR079W
YLR316C	YER078C	YGR111W	OG4497_1		YPL031C					YOR104W
YLR336C	YER086W	YJL132W	OG4630_1		YNL267W					YBR041W
YLR348C	YER090W	YLR211C	OG5323_1		YBL105C					YPR026W
YLR384C	YER095W	YPR122W	OG5366_1		YPL268W					YPL087W
YLR397C	YER104W	YPR068C	OG7615_1		YDR501W					YBR183W
YLR401C	YER111C	YJL048C	OG7689_1		YDR183W					YCR016W
YLR409C	YER113C	YML011C	OG16067_1		YOR281C					YBR203W
YLR414C	YER118C	YIL077C	OG21355_1		YNL082W					YJL201W
YLR432W	YER146W	YOR220W	OG24347_1		YDL095W					YGL005C
YLR435W	YER149C	YMR094W	OG24731_1		YPL096W					YPR083W
YLR449W	YER154W	YGR206W	OG24840_1		YML069W					YDR056C
YML023C	YER164W	YKR046C	OG25342_1		YNL102W					YGR128C
YML043C	YER165W	YML029W	OG25436_1		YDL102W					YBR230C
YML080W	YER166W	YDR022C	OG26015_1		YBR088C					YML091C
YML093W	YER168C	YMR160W	OG26026_1		YJR043C					YIL127C
YMR001C	YER176W	YMR184W			YCR014C					YIL057C
YMR014W	YFL022C	YIL146C			YPL188W					YER067W
YMR032W	YFL024C	YBR157C			YKL045W					YOL070C
YMR049C	YFL025C	YLR219W			YNL279W					YDR488C
YMR080C	YFL041W	YJL161W			YKL116C					YHR060W
YMR093W	YFR005C	YLR053C			YBL064C					YDR184C
YMR117C	YFR009W	YLR257W			YJL072C					YNR028W
YMR128W	YFR018C	YOL025W			YOL146W					YCR069W
YMR131C	YFR030W	YIL055C			YLR376C					YNR014W
YMR166C	YFR034C	YGL081W			YDL006W					YMR206W
YMR189W	YGL016W	YGR237C			YCR079W					YDL169C
YMR202W	YGL030W	YGL262W			YBR043C					YOR372C
YMR217W	YGL032C	YIL024C			YPL022W					YPL071C
YMR228W	YGL049C	YPL033C			YML095C					YPL068C
YMR229C	YGL050W	YNL234W			YMR201C					YJL185C
YMR269W	YGL068W	YDR058C			YBR114W					YLR413W
YMR290C	YGL076C	YKL103C			YGR258C					YKL187C
YNL002C	YGL080W	YKL188C			YEL037C					YIL146C
YNL014W	YGL097W	YPL164C			YER173W					YPR151C
YNL022C	YGL103W	YNL012W			YJR035W					YCR043C
YNL035C	YGL105W	YJR019C			YER171W					YIL161W
YNL061W	YGL116W	YBL064C			YML011C					YGR275W
YNL062C	YGL123W	YDL123W			YNL250W					YBR165W
YNL075W	YGL129C	YDL218W			YER095W					YLR267W
YNL102W	YGL130W	YHL027W			YPL153C					YJL161W
YNL110C	YGL148W	YJR107W			YGL163C					YHR136C
YNL112W	YGL154C	YFL003C			YGL058W					YDR070C
YNL113W	YGL155W	YBR043C			YJR052W					YLR053C
YNL119W	YGL172W	YBR240C			YDR217C					YKR007W
YNL123W	YGL187C	YMR173W			YMR274C					YLR257W
YNL124W	YGL189C	YLL054C			YKL159C					YHR127W
YNL132W	YGL195W	YJL073W			YBR073W					YLR312C
YNL141W	YGL220W	YBR062C			YDL135C					YGL081W
YNL175C	YGL232W	YBR204C			YOR380W					YBL006C
YNL182C	YGL236C	YCL027W			YPR094W					YOR230W
YNL186W	YGL241W	YJL057C			YDR028C					YNR004W
YNL207W	YGL245W	YMR020W			YBR050C					YPL130W
YNL248C	YGL246C	YNR064C			YPL167C					YCR039C
YNL282W	YGR001C	YNL208W			YAR007C					YBR067C
YNL289W	YGR010W	YGR266W			YNL312W					YOL082W
YNL292W	YGR014W	OG404_1			YJL173C					YHL021C
YNL300W	YGR024C	OG505_1			YPR115W					YNL002C
YNL308C	YGR027C	OG1533_1			YBR260C					YAR035W
YNL327W	YGR054W	OG1654_1			YMR182C					YHR053C
YNR003C	YGR061C	OG1757_1			YOR107W					YLR093C
YNR009W	YGR065C	OG1838_1			YNL090W					YIL164C
YNR015W	YGR066C	OG2030_1			YKR055W					YER176W
YNR024W	YGR076C	OG3008_1			YNL180C					YHR138C
YNR038W	YGR083C	OG3040_1			YHL027W					YGR233C
YNR053C	YGR084C	OG3655_1			YOR275C					YIR017C
YNR054C	YGR085C	OG5645_1			YPL024W					YNL160W
YNR055C	YGR089W	OG9195_1			YHR200W					YHR139C
YNR063W	YGR096W	OG14486_1			YOR259C					YDL122W
YOL010W	YGR116W	OG14567_1			YGL048C					YDR321W
YOL041C	YGR118W	OG19066_1			YIL153W					YJL206C
YOL077C	YGR119C	OG24167_1			YPL152W					YKL214C
YOL080C	YGR129W	OG24707_1			YDL216C					YOR344C
YOL124C	YGR155W	OG25530_1			YOL117W					YJL089W
YOL125W	YGR157W	OG25856_1			YOL067C					YJR150C
YOL142W	YGR158C				YGL252C					YBL066C
YOL144W	YGR165W				YOR014W					YOR380W
YOR001W	YGR171C				YHR154W					YMR068W
YOR004W	YGR181W				YLL002W					YKL088W
YOR006C	YGR183C				YCR009C					YMR020W
YOR017W	YGR185C				YDR129C					YNR064C
YOR033C	YGR193C				YDR389W					YIL121W
YOR056C	YGR195W				YGL175C					YNL208W
YOR078W	YGR203W				YJR004C					YDL199C
YOR119C	YGR208W				YDR143C					YOR062C
YOR145C	YGR215W				YAL027W					YKR075C
YOR204W	YGR216C				YDR180W
YOR206W	YGR220C				YER147C
YOR210W	YGR221C				YMR214W
YOR243C	YGR244C				YJL080C
YOR252W	YGR262C				YGL224C
YOR271C	YGR264C				YBR080C
YOR272W	YGR267C				YOR165W
YOR287C	YGR276C				YMR190C
YOR294W	YGR285C				YOR007C
YOR310C	YGR286C				YBL058W
YOR340C	YHL001W				YHL006C
YOR341W	YHL004W				YDR078C
YPL012W	YHL014C				YMR140W
YPL029W	YHL015W				YLR442C
YPL043W	YHR007C				YKR072C
YPL061W	YHR010W				YPL026C
YPL068C	YHR013C				YMR216C
YPL075W	YHR019C				YKL108W
YPL086C	YHR020W				YGR271W
YPL093W	YHR023W				YIL105C
YPL126W	YHR025W				YNL047C
YPL127C	YHR026W				YBR077C
YPL128C	YHR035W				YIL147C
YPL146C	YHR038W				YHR030C
YPL165C	YHR039C				YBR228W
YPL183C	YHR047C				YDL013W
YPL193W	YHR049W				YFL008W
YPL207W	YHR059W				YML058W
YPL211W	YHR061C				YDR477W
YPL217C	YHR062C				YBR289W
YPL231W	YHR064C				YHL025W
YPL239W	YHR068W				YLR025W
YPL242C	YHR091C				YPL002C
YPL266W	YHR099W				YJR104C
YPR006C	YHR116W				YOR353C
YPR010C	YHR117W				YGL127C
YPR035W	YHR119W				YDR006C
YPR110C	YHR120W				YLR313C
YPR124W	YHR142W				YKR031C
YPR137W	YHR144C				YGL207W
YPR138C	YHR147C				YOL148C
YPR143W	YHR152W				YHR041C
YPR144C	YHR162W				YCR081W
YPR163C	YHR172W				YPR032W
YPR169W	YHR187W				YBL106C
YPR175W	YHR191C				YJL092W
YPR186C	YHR203C				YNL138W
YPR190C	YHR205W				YLR006C
OG1769_1	YIL008W				YLR005W
OG1787_1	YIL009W				YIL143C
OG1883_1	YIL018W				YDR443C
OG1965_1	YIL020C				YPL042C
OG24603_1	YIL022W				YNL025C
OG24996_1	YIL027C				YLR369W
OG2565_1	YIL049W				YLR452C
OG2615_1	YIL061C				YJL156C
OG3125_1	YIL064W				YDR169C
OG338_1	YIL069C				YHR178W
OG3483_1	YIL078W				YOR047C
OG427_1	YIL090W				YLR362W
OG4528_1	YIL093C				YHR084W
OG5512_1	YIL098C				YLR389C
OG5577_1	YIL118W				YOR212W
OG698_1	YIL125W				YDR103W
OG7628_1	YIL130W				YCL032W
OG834_1	YIL131C				YKL209C
OG8746_1	YIL132C				YDL159W
OG9161_1	YIL133C				YIR011C
	YIL134W				YDL084W
	YIL144W				YJR046W
	YIL145C				YBR044C
	YIL148W				YPL180W
	YIL157C				YBR223C
	YIL169C				YML064C
	YIR001C				YNL128W
	YIR010W				YDR311W
	YIR023W				YPL122C
	YJL003W				YDR460W
	YJL006C				YPR056W
	YJL024C				YOL072W
	YJL035C				YPR040W
	YJL039C				YLR183C
	YJL041W				YMR156C
	YJL045W				YDR074W
	YJL054W				YHR106W
	YJL060W				YER093C
	YJL061W				YLR425W
	YJL062W				YHR111W
	YJL063C				YMR022W
	YJL087C				YGR048W
	YJL092W				YDL190C
	YJL097W				YML088W
	YJL102W				YBR173C
	YJL115W				YDR213W
	YJL131C				YPL230W
	YJL143W				YOR106W
	YJL162C				YDR247W
	YJL166W				YOR054C
	YJL168C				YBR097W
	YJL177W				YJR102C
	YJL179W				YPL120W
	YJL181W				YLR240W
	YJL184W				YLR417W
	YJL191W				YDR200C
	YJL208C				YNL246W
	YJR003C				YHR134W
	YJR006W				YDR369C
	YJR042W				YDR259C
	YJR056C				YBR216C
	YJR060W				YGL060W
	YJR072C				YDR222W
	YJR094W-A				YER041W
	YJR097W				YER158C
	YJR105W				YHR029C
	YJR113C				YHR182W
	YJR115W				YKL075C
	YJR122W				YKL161C
	YJR129C				YKL222C
	YJR140C				YMR284W
	YJR141W				YMR106C
	YKL003C				YLR224W
	YKL008C				YNL305C
	YKL024C				YNR064C
	YKL029C				YDL235C
	YKL056C				YBR264C
	YKL067W				YOR172W
	YKL068W				YOR162C
	YKL069W				YNL310C
	YKL070W
	YKL098W
	YKL113C
	YKL116C
	YKL138C
	YKL149C
	YKL154W
	YKL156W
	YKL167C
	YKL170W
	YKL182W
	YKL184W
	YKL191W
	YKL194C
	YKL205W
	YKL211C
	YKL216W
	YKR005C
	YKR026C
	YKR028W
	YKR038C
	YKR050W
	YKR052C
	YKR054C
	YKR057W
	YKR064W
	YKR077W
	YKR079C
	YKR082W
	YKR085C
	YKR099W
	YLL004W
	YLL007C
	YLL012W
	YLL021W
	YLL031C
	YLL045C
	YLR008C
	YLR014C
	YLR017W
	YLR022C
	YLR029C
	YLR047C
	YLR048W
	YLR056W
	YLR057W
	YLR060W
	YLR069C
	YLR075W
	YLR079W
	YLR084C
	YLR099C
	YLR141W
	YLR143W
	YLR145W
	YLR147C
	YLR150W
	YLR152C
	YLR167W
	YLR172C
	YLR190W
	YLR195C
	YLR200W
	YLR204W
	YLR210W
	YLR239C
	YLR243W
	YLR244C
	YLR264W
	YLR265C
	YLR274W
	YLR285W
	YLR286C
	YLR287C-A
	YLR304C
	YLR315W
	YLR323C
	YLR325C
	YLR335W
	YLR340W
	YLR359W
	YLR375W
	YLR382C
	YLR385C
	YLR390W
	YLR405W
	YLR406C
	YLR407W
	YLR412W
	YLR413W
	YLR419W
	YLR420W
	YLR422W
	YLR430W
	YLR439W
	YLR441C
	YLR448W
	YLR450W
	YML005W
	YML008C
	YML009C
	YML014W
	YML024W
	YML025C
	YML026C
	YML031W
	YML036W
	YML038C
	YML046W
	YML079W
	YML087C
	YML096W
	YML103C
	YML108W
	YML110C
	YML119W
	YML120C
	YML124C
	YML126C
	YML129C
	YMR003W
	YMR012W
	YMR015C
	YMR024W
	YMR059W
	YMR061W
	YMR064W
	YMR065W
	YMR116C
	YMR123W
	YMR127C
	YMR129W
	YMR132C
	YMR146C
	YMR158W
	YMR163C
	YMR172W
	YMR177W
	YMR188C
	YMR193W
	YMR194W
	YMR203W
	YMR204C
	YMR221C
	YMR225C
	YMR241W
	YMR242C
	YMR243C
	YMR255W
	YMR257C
	YMR259C
	YMR260C
	YMR271C
	YMR282C
	YMR283C
	YMR286W
	YMR287C
	YMR296C
	YMR300C
	YMR301C
	YMR305C
	YMR312W
	YNL004W
	YNL005C
	YNL016W
	YNL023C
	YNL026W
	YNL027W
	YNL037C
	YNL038W
	YNL048W
	YNL050C
	YNL067W
	YNL070W
	YNL078W
	YNL080C
	YNL081C
	YNL096C
	YNL111C
	YNL122C
	YNL126W
	YNL131W
	YNL137C
	YNL147W
	YNL151C
	YNL153C
	YNL154C
	YNL158W
	YNL162W
	YNL164C
	YNL177C
	YNL185C
	YNL188W
	YNL201C
	YNL209W
	YNL213C
	YNL216W
	YNL217W
	YNL221C
	YNL232W
	YNL244C
	YNL246W
	YNL247W
	YNL251C
	YNL252C
	YNL255C
	YNL256W
	YNL262W
	YNL264C
	YNL280C
	YNL283C
	YNL284C
	YNL294C
	YNL302C
	YNL306W
	YNL313C
	YNL315C
	YNR004W
	YNR010W
	YNR012W
	YNR016C
	YNR017W
	YNR021W
	YNR022C
	YNR032W
	YNR037C
	YNR040W
	YNR043W
	YNR046W
	YNR050C
	YNR057C
	YOL005C
	YOL012C
	YOL021C
	YOL022C
	YOL023W
	YOL027C
	YOL030W
	YOL039W
	YOL040C
	YOL064C
	YOL070C
	YOL076W
	YOL084W
	YOL093W
	YOL094C
	YOL097C
	YOL113W
	YOL115W
	YOL120C
	YOL123W
	YOL127W
	YOL139C
	YOL141W
	YOR021C
	YOR037W
	YOR039W
	YOR045W
	YOR048C
	YOR061W
	YOR063W
	YOR087W
	YOR091W
	YOR095C
	YOR107W
	YOR116C
	YOR136W
	YOR149C
	YOR150W
	YOR158W
	YOR159C
	YOR168W
	YOR179C
	YOR201C
	YOR207C
	YOR222W
	YOR224C
	YOR228C
	YOR232W
	YOR264W
	YOR266W
	YOR269W
	YOR274W
	YOR276W
	YOR278W
	YOR281C
	YOR288C
	YOR293W
	YOR301W
	YOR304W
	YOR305W
	YOR307C
	YOR308C
	YOR311C
	YOR315W
	YOR330C
	YOR335C
	YOR354C
	YOR356W
	YOR359W
	YOR361C
	YOR369C
	YPL013C
	YPL016W
	YPL018W
	YPL019C
	YPL023C
	YPL030W
	YPL040C
	YPL057C
	YPL063W
	YPL076W
	YPL078C
	YPL081W
	YPL082C
	YPL083C
	YPL101W
	YPL103C
	YPL108W
	YPL117C
	YPL118W
	YPL129W
	YPL131W
	YPL143W
	YPL148C
	YPL157W
	YPL158C
	YPL160W
	YPL163C
	YPL169C
	YPL172C
	YPL173W
	YPL184C
	YPL215W
	YPL216W
	YPL220W
	YPL237W
	YPL241C
	YPL243W
	YPL244C
	YPL245W
	YPL246C
	YPL255W
	YPL262W
	YPL263C
	YPL277C
	YPR001W
	YPR016C
	YPR017C
	YPR020W
	YPR021C
	YPR033C
	YPR041W
	YPR047W
	YPR052C
	YPR062W
	YPR063C
	YPR069C
	YPR075C
	YPR083W
	YPR088C
	YPR100W
	YPR104C
	YPR119W
	YPR131C
	YPR139C
	YPR140W
	YPR145W
	YPR147C
	YPR166C
	YPR182W
	YPR187W
	OG1074_1
	OG1206_1
	OG1228_1
	OG15107_1
	OG15366_1
	OG1550_1
	OG1576_1
	OG1604_1
	OG1817_1
	OG1847_1
	OG1957_1
	OG19939_1
	OG20000_1
	OG20177_1
	OG20196_1
	OG20215_1
	OG206_1
	OG2087_1
	OG21363_1
	OG21367_1
	OG23753_1
	OG2380_1
	OG2414_1
	OG2423_1
	OG2429_1
	OG24377_1
	OG24451_1
	OG25037_1
	OG25189_1
	OG253_1
	OG25852_1
	OG2639_1
	OG2704_1
	OG2792_1
	OG2908_1
	OG2982_1
	OG3002_1
	OG3065_1
	OG3136_1
	OG3164_1
	OG3270_1
	OG3275_1
	OG3333_1
	OG3650_1
	OG365_1
	OG3694_1
	OG3732_1
	OG3753_1
	OG3894_1
	OG3914_1
	OG4293_1
	OG4373_1
	OG4490_1
	OG4519_1
	OG474_1
	OG481_1
	OG4901_1
	OG5402_1
	OG5475_1
	OG619_1
	OG981_1

## Sheet: Supp Table 5
Supplementary Table 4
Heat					Glucose depletion
Processes associated with high switching		Processes associated with low switching			Processes associated with high switching		Processes associated with low switching
Process Name	KS-test pvalue	Process Name	KS-test pvalue		Process Name	KS-test pvalue	Process Name	KS-test pvalue
cellular-amino-acid-biosynthetic-process	0.000197	ribosome-biogenesis	0		cellular-alcohol-biosynthetic-process	3.8e-05	ribosome-biogenesis	0
amine-biosynthetic-process	0.000259	rRNA-processing	0		cellular-alcohol-metabolic-process	3.8e-05	rRNA-processing	0
cellular-amine-metabolic-process	0.000352	rRNA-metabolic-process	0		ergosterol-biosynthetic-process	3.8e-05	rRNA-metabolic-process	0
carboxylic-acid-biosynthetic-process	0.000403	ribonucleoprotein-complex-biogenesis	0		ergosterol-metabolic-process	3.8e-05	ribonucleoprotein-complex-biogenesis	0
organic-acid-biosynthetic-process	0.000403	ribosomal-large-subunit-biogenesis	0		phytosteroid-biosynthetic-process	3.8e-05	cellular-component-biogenesis-at-cellular-level	0
cellular-amino-acid-metabolic-process	0.000546	cellular-component-biogenesis-at-cellular-level	0		phytosteroid-metabolic-process	3.8e-05	ribosomal-small-subunit-biogenesis	0
amine-metabolic-process	0.000624	ncRNA-processing	0		cellular-iron-ion-homeostasis	3.9e-05	ncRNA-processing	0
small-molecule-biosynthetic-process	0.000935	ribosomal-small-subunit-biogenesis	0		pigment-biosynthetic-process	4.8e-05	maturation-of-SSU-rRNA-from-tricistronic-rRNA-transcript-(SSU-rRNA,-5.8S-rRNA,-LSU-rRNA)	0
glutamine-family-amino-acid-metabolic-process	0.001204	ncRNA-metabolic-process	0		ion-transport	7.3e-05	ncRNA-metabolic-process	0
arginine-metabolic-process	0.001265	maturation-of-SSU-rRNA-from-tricistronic-rRNA-transcript-(SSU-rRNA,-5.8S-rRNA,-LSU-rRNA)	0		mitochondrion-organization	9.2e-05	maturation-of-SSU-rRNA	0
cellular-nitrogen-compound-biosynthetic-process	0.001383	maturation-of-SSU-rRNA	0		metal-ion-transport	0.000119	ribosomal-large-subunit-biogenesis	0
regulation-of-protein-serine/threonine-kinase-activity	0.001594	ribosomal-large-subunit-assembly	0		steroid-metabolic-process	0.000134	RNA-processing	0
nucleosome-assembly	0.001657	cellular-component-biogenesis	0		sterol-metabolic-process	0.000134	maturation-of-5.8S-rRNA	0
homeostatic-process	0.00177	RNA-processing	0		pigment-metabolic-process	0.000169	maturation-of-5.8S-rRNA-from-tricistronic-rRNA-transcript-(SSU-rRNA,-5.8S-rRNA,-LSU-rRNA)	0
pigment-biosynthetic-process	0.002203	maturation-of-5.8S-rRNA	0		iron-ion-homeostasis	0.000176	endonucleolytic-cleavage-in-ITS1-to-separate-SSU-rRNA-from-5.8S-rRNA-and-LSU-rRNA-from-tricistronic-rRNA-transcript-(SSU-rRNA,-5.8S-rRNA,-LSU-rRNA)	0
cellular-ketone-metabolic-process	0.002348	maturation-of-5.8S-rRNA-from-tricistronic-rRNA-transcript-(SSU-rRNA,-5.8S-rRNA,-LSU-rRNA)	0		steroid-biosynthetic-process	0.000198	endonucleolytic-cleavage-involved-in-rRNA-processing	0
serine-family-amino-acid-metabolic-process	0.00238	ribosome-assembly	0		sterol-biosynthetic-process	0.000198	endonucleolytic-cleavage-of-tricistronic-rRNA-transcript-(SSU-rRNA,-5.8S-rRNA,-LSU-rRNA)	0
carboxylic-acid-metabolic-process	0.002749	endonucleolytic-cleavage-in-ITS1-to-separate-SSU-rRNA-from-5.8S-rRNA-and-LSU-rRNA-from-tricistronic-rRNA-transcript-(SSU-rRNA,-5.8S-rRNA,-LSU-rRNA)	0		iron-sulfur-cluster-assembly	0.000386	cellular-component-biogenesis	0
oxoacid-metabolic-process	0.002749	endonucleolytic-cleavage-involved-in-rRNA-processing	0		metallo-sulfur-cluster-assembly	0.000386	cleavage-involved-in-rRNA-processing	0
mitochondrial-translation	0.002805	endonucleolytic-cleavage-of-tricistronic-rRNA-transcript-(SSU-rRNA,-5.8S-rRNA,-LSU-rRNA)	0		cellular-homeostasis	0.000471	ncRNA-5'-end-processing	0
organic-acid-metabolic-process	0.003102	ncRNA-5'-end-processing	0		copper-ion-transport	0.000499	rRNA-5'-end-processing	0
pteridine-containing-compound-biosynthetic-process	0.003465	rRNA-5'-end-processing	0		regulation-of-signaling	0.0006	RNA-5'-end-processing	0
mitotic-sister-chromatid-segregation	0.004271	cleavage-involved-in-rRNA-processing	0		response-to-chemical-stimulus	0.000806	endonucleolytic-cleavage-in-5'-ETS-of-tricistronic-rRNA-transcript-(SSU-rRNA,-5.8S-rRNA,-LSU-rRNA)	0
mitotic-sister-chromatid-cohesion	0.004513	RNA-metabolic-process	0		alcohol-biosynthetic-process	0.000817	endonucleolytic-cleavage-to-generate-mature-5'-end-of-SSU-rRNA-from-(SSU-rRNA,-5.8S-rRNA,-LSU-rRNA)	0
cofactor-biosynthetic-process	0.004736	RNA-5'-end-processing	0		cation-transport	0.000861	RNA-metabolic-process	0
pigment-metabolic-process	0.00494	organelle-assembly	0		homeostatic-process	0.000922	ribosome-assembly	0
alcohol-metabolic-process	0.005056	endonucleolytic-cleavage-to-generate-mature-5'-end-of-SSU-rRNA-from-(SSU-rRNA,-5.8S-rRNA,-LSU-rRNA)	0		transition-metal-ion-transport	0.000936	establishment-of-ribosome-localization	0
M-phase-of-mitotic-cell-cycle	0.005238	gene-expression	0		regulation-of-signal-transduction	0.001027	rRNA-containing-ribonucleoprotein-complex-export-from-nucleus	0
cellular-response-to-stimulus	0.005247	nucleic-acid-phosphodiester-bond-hydrolysis	0		small-molecule-biosynthetic-process	0.001162	ribonucleoprotein-complex-export-from-nucleus	0
glutamine-family-amino-acid-biosynthetic-process	0.005268	endonucleolytic-cleavage-in-5'-ETS-of-tricistronic-rRNA-transcript-(SSU-rRNA,-5.8S-rRNA,-LSU-rRNA)	0		cell-redox-homeostasis	0.001223	ribonucleoprotein-complex-localization	0
phosphate-metabolic-process	0.005433	maturation-of-LSU-rRNA	0		alcohol-metabolic-process	0.001271	ribosomal-subunit-export-from-nucleus	0
phosphorus-metabolic-process	0.005433	maturation-of-LSU-rRNA-from-tricistronic-rRNA-transcript-(SSU-rRNA,-5.8S-rRNA,-LSU-rRNA)	0		lipid-metabolic-process	0.001731	ribosome-localization	0
cellular-process-involved-in-reproduction	0.006115	nucleic-acid-metabolic-process	1e-06		lipid-biosynthetic-process	0.001773	maturation-of-LSU-rRNA	0
reproductive-process	0.006115	modification-dependent-macromolecule-catabolic-process	4e-06		mitochondrial-translation	0.00178	maturation-of-LSU-rRNA-from-tricistronic-rRNA-transcript-(SSU-rRNA,-5.8S-rRNA,-LSU-rRNA)	0
G-protein-coupled-receptor-protein-signaling-pathway	0.007195	cellular-macromolecule-metabolic-process	6e-06		heme-biosynthetic-process	0.001866	nucleic-acid-phosphodiester-bond-hydrolysis	0
cell-surface-receptor-linked-signaling-pathway	0.007195	nucleobase,-nucleoside,-nucleotide-and-nucleic-acid-metabolic-process	9e-06		isoprenoid-biosynthetic-process	0.001866	ribosomal-large-subunit-assembly	0
mitosis	0.007689	macromolecule-metabolic-process	1.1e-05		isoprenoid-metabolic-process	0.001866	proteasomal-ubiquitin-independent-protein-catabolic-process	1e-06
folic-acid-containing-compound-metabolic-process	0.008246	macromolecule-catabolic-process	1.6e-05		porphyrin-biosynthetic-process	0.001866	gene-expression	5e-06
glutamine-metabolic-process	0.008534	snoRNA-3'-end-processing	1.6e-05		tetrapyrrole-biosynthetic-process	0.001866	cellular-component-organization-or-biogenesis-at-cellular-level	1.3e-05
signaling	0.009745	regulation-of-protein-complex-assembly	2.1e-05		regulation-of-biological-quality	0.001954	organelle-assembly	1.9e-05
phosphorylation	0.010079	establishment-of-protein-localization	2.1e-05		cellular-response-to-chemical-stimulus	0.002247	ribosomal-large-subunit-export-from-nucleus	2.3e-05
regulation-of-protein-kinase-activity	0.010433	rRNA-modification	2.1e-05		phospholipid-metabolic-process	0.002264	nuclear-export	3.1e-05
nuclear-division	0.010486	protein-transport	2.6e-05		reproduction	0.002619	nucleic-acid-metabolic-process	3.1e-05
pteridine-containing-compound-metabolic-process	0.010623	cellular-macromolecule-catabolic-process	2.6e-05		response-to-organic-substance	0.002708	nuclear-transport	3.1e-05
M-phase	0.011389	ribonucleoprotein-complex-subunit-organization	5e-05		DNA-recombination	0.002737	nucleocytoplasmic-transport	3.1e-05
telomere-organization	0.011424	ribonucleoprotein-complex-assembly	5.7e-05		heterocycle-metabolic-process	0.002852	cellular-component-organization-or-biogenesis	7.3e-05
sister-chromatid-segregation	0.011822	intracellular-transport	6.8e-05		intracellular-protein-kinase-cascade	0.003336	establishment-of-organelle-localization	9.3e-05
signal-transduction	0.012816	proteasomal-ubiquitin-independent-protein-catabolic-process	8e-05		adaptation-of-signaling-pathway	0.003339	tRNA-transcription	0.000103
small-molecule-metabolic-process	0.012966	proteolysis-involved-in-cellular-protein-catabolic-process	8.4e-05		adaptation-of-signaling-pathway-by-response-to-pheromone-involved-in-conjugation-with-cellular-fusion	0.003339	tRNA-transcription-from-RNA-polymerase-III-promoter	0.000103
sister-chromatid-cohesion	0.013104	catabolic-process	8.8e-05		regulation-of-response-to-stimulus	0.003449	intra-Golgi-vesicle-mediated-transport	0.000154
mitochondrion-organization	0.013277	macromolecule-localization	9.9e-05		invasive-growth-in-response-to-glucose-limitation	0.003788	organelle-localization	0.00017
monocarboxylic-acid-metabolic-process	0.013766	establishment-of-ribosome-localization	0.000117		arginine-metabolic-process	0.004868	rRNA-modification	0.000174
organelle-fission	0.01387	rRNA-containing-ribonucleoprotein-complex-export-from-nucleus	0.000117		cellular-process-involved-in-reproduction	0.005048	transcription-of-nuclear-rRNA-large-RNA-polymerase-I-transcript	0.000216
anatomical-structure-homeostasis	0.013979	ribonucleoprotein-complex-export-from-nucleus	0.000117		reproductive-process	0.005048	protein-transport	0.000291
telomere-maintenance	0.013979	ribonucleoprotein-complex-localization	0.000117		regulation-of-Ras-protein-signal-transduction	0.00512	mRNA-binding-(hnRNP)-protein-import-into-nucleus	0.000324
cell-redox-homeostasis	0.014716	ribosomal-subunit-export-from-nucleus	0.000117		organophosphate-metabolic-process	0.005663	ribonucleoprotein-complex-assembly	0.000407
mitochondrial-respiratory-chain-complex-assembly	0.015967	ribosome-localization	0.000117		meiotic-cell-cycle	0.006609	energy-derivation-by-oxidation-of-organic-compounds	0.000472
oxidation-reduction-process	0.016231	cellular-protein-catabolic-process	0.000122		small-molecule-metabolic-process	0.007275	cellular-macromolecule-metabolic-process	0.000597
cellular-homeostasis	0.017388	polyadenylation-dependent-snoRNA-3'-end-processing	0.000125		positive-regulation-of-Ras-GTPase-activity	0.007315	cofactor-catabolic-process	0.000604
sexual-reproduction	0.018036	ER-associated-protein-catabolic-process	0.00013		heme-metabolic-process	0.007502	cellular-macromolecular-complex-subunit-organization	0.000678
regulation-of-biological-quality	0.018219	protein-catabolic-process	0.000135		porphyrin-metabolic-process	0.007502	ribonucleoprotein-complex-subunit-organization	0.000771
meiotic-cell-cycle	0.018361	establishment-of-localization-in-cell	0.000137		tetrapyrrole-metabolic-process	0.007502	macromolecular-complex-subunit-organization	0.000771
response-to-DNA-damage-stimulus	0.020058	modification-dependent-protein-catabolic-process	0.000188		cellular-chemical-homeostasis	0.00751	cellular-macromolecular-complex-assembly	0.000794
glutamate-biosynthetic-process	0.021194	ubiquitin-dependent-protein-catabolic-process	0.000188		mitochondrial-genome-maintenance	0.008083	proteasome-assembly	0.000808
intracellular-protein-kinase-cascade	0.021265	regulation-of-cellular-component-biogenesis	0.00019		cellular-nitrogen-compound-biosynthetic-process	0.008099	macromolecule-metabolic-process	0.000847
cellular-respiration	0.021445	nuclear-polyadenylation-dependent-mRNA-catabolic-process	0.000221		signaling	0.008607	rRNA-export-from-nucleus	0.000848
electron-transport-chain	0.021789	nuclear-polyadenylation-dependent-tRNA-catabolic-process	0.000221		cell-cycle-process	0.008739	rRNA-transport	0.000848
M-phase-of-meiotic-cell-cycle	0.02221	polyadenylation-dependent-mRNA-catabolic-process	0.000221		reproduction-of-a-single-celled-organism	0.009098	protein-localization	0.00085
meiosis	0.02221	tRNA-catabolic-process	0.000221		biosynthetic-process	0.009241	positive-regulation-of-transcription-from-RNA-polymerase-I-promoter	0.00091
serine-family-amino-acid-biosynthetic-process	0.023761	protein-localization	0.00024		sulfur-compound-metabolic-process	0.00926	nucleobase,-nucleoside,-nucleotide-and-nucleic-acid-metabolic-process	0.000924
ethanolamine-containing-compound-metabolic-process	0.023957	cellular-component-organization-or-biogenesis	0.000251		protein-dephosphorylation	0.009274	establishment-of-protein-localization	0.001024
purine-base-biosynthetic-process	0.024834	cellular-component-organization-or-biogenesis-at-cellular-level	0.000265		secretion	0.009317	macromolecular-complex-assembly	0.00103
mitotic-spindle-elongation	0.024862	protein-refolding	0.000462		secretion-by-cell	0.009317	rRNA-transcription	0.001048
spindle-elongation	0.024862	cellular-localization	0.000562		M-phase-of-meiotic-cell-cycle	0.009481	Golgi-vesicle-transport	0.001196
generation-of-precursor-metabolites-and-energy	0.026741	nuclear-ncRNA-surveillance	0.000593		meiosis	0.009481	nuclear-pore-organization	0.001245
response-to-pheromone-involved-in-conjugation-with-cellular-fusion	0.027157	nuclear-polyadenylation-dependent-ncRNA-catabolic-process	0.000593		regulation-of-small-GTPase-mediated-signal-transduction	0.009723	acetyl-CoA-catabolic-process	0.001282
glycolysis	0.027293	polyadenylation-dependent-RNA-catabolic-process	0.000593		chemical-homeostasis	0.010499	coenzyme-catabolic-process	0.001282
cellular-amino-acid-catabolic-process	0.029892	polyadenylation-dependent-ncRNA-catabolic-process	0.000593		cellular-response-to-organic-substance	0.010825	tricarboxylic-acid-cycle	0.001282
response-to-pheromone	0.030985	cellular-catabolic-process	0.000651		dephosphorylation	0.010975	macromolecule-localization	0.001315
respiratory-chain-complex-IV-assembly	0.031121	ncRNA-catabolic-process	0.00073		cell-differentiation	0.011057	ATP-synthesis-coupled-electron-transport	0.001559
heme-biosynthetic-process	0.032685	rRNA-catabolic-process	0.00073		signal-transduction	0.011303	mitochondrial-ATP-synthesis-coupled-electron-transport	0.001559
porphyrin-biosynthetic-process	0.032685	vesicle-mediated-transport	0.000761		divalent-inorganic-cation-transport	0.011336	oxidative-phosphorylation	0.001559
tetrapyrrole-biosynthetic-process	0.032685	nuclear-transport	0.00079		cellular-metal-ion-homeostasis	0.011709	respiratory-electron-transport-chain	0.001559
cotranslational-protein-targeting-to-membrane	0.033351	nucleocytoplasmic-transport	0.00079		metal-ion-homeostasis	0.011709	CVT-pathway	0.001826
chromosome-segregation	0.034441	cellular-macromolecule-localization	0.000841		cellular-lipid-metabolic-process	0.013168	snRNA-metabolic-process	0.001943
cysteine-metabolic-process	0.03447	regulation-of-transcription-from-RNA-polymerase-I-promoter	0.000869		IMP-biosynthetic-process	0.013359	transcription-from-RNA-polymerase-I-promoter	0.002147
regulation-of-conjugation	0.034499	cellular-nitrogen-compound-metabolic-process	0.000927		IMP-metabolic-process	0.013359	macromolecule-catabolic-process	0.002149
regulation-of-conjugation-with-cellular-fusion	0.034499	transport	0.000945		regulation-of-chromatin-silencing	0.01336	acetyl-CoA-metabolic-process	0.002508
regulation-of-multi-organism-process	0.034499	intracellular-protein-transport	0.000965		regulation-of-gene-silencing	0.01336	nuclear-polyadenylation-dependent-rRNA-catabolic-process	0.002664
heterocycle-biosynthetic-process	0.035284	proteasomal-protein-catabolic-process	0.000984		cellular-biosynthetic-process	0.014215	polyadenylation-dependent-snoRNA-3'-end-processing	0.002909
alcohol-biosynthetic-process	0.035729	proteasomal-ubiquitin-dependent-protein-catabolic-process	0.000984		sexual-reproduction	0.014468	RNA-methylation	0.003112
cellular-response-to-chemical-stimulus	0.036821	cellular-protein-localization	0.001125		exocytosis	0.014858	transcription-from-RNA-polymerase-III-promoter	0.00319
response-to-organic-substance	0.036899	nitrogen-compound-metabolic-process	0.001142		regulation-of-Ras-GTPase-activity	0.014946	intracellular-transport	0.003245
reproductive-process-in-single-celled-organism	0.037008	macromolecular-complex-subunit-organization	0.001145		positive-regulation-of-hydrolase-activity	0.015182	cellular-protein-localization	0.003486
fungal-type-cell-wall-biogenesis	0.038341	transcription-from-RNA-polymerase-II-promoter	0.001205		response-to-stimulus	0.015751	cellular-macromolecule-catabolic-process	0.003706
ATP-synthesis-coupled-electron-transport	0.041537	ribosomal-large-subunit-export-from-nucleus	0.001277		positive-regulation-of-Rab-GTPase-activity	0.015899	nuclear-ncRNA-surveillance	0.004323
mitochondrial-ATP-synthesis-coupled-electron-transport	0.041537	RNA-methylation	0.001283		negative-regulation-of-biosynthetic-process	0.016021	nuclear-polyadenylation-dependent-ncRNA-catabolic-process	0.004323
oxidative-phosphorylation	0.041537	establishment-of-localization	0.001401		negative-regulation-of-cellular-biosynthetic-process	0.016021	polyadenylation-dependent-RNA-catabolic-process	0.004323
respiratory-electron-transport-chain	0.041537	nuclear-export	0.001491		anatomical-structure-formation-involved-in-morphogenesis	0.017064	polyadenylation-dependent-ncRNA-catabolic-process	0.004323
protein-modification-process	0.041909	nuclear-polyadenylation-dependent-rRNA-catabolic-process	0.001569		sporulation	0.017064	ATP-dependent-chromatin-remodeling	0.004471
cellular-biosynthetic-process	0.041993	proteolysis	0.001594		sporulation-resulting-in-formation-of-a-cellular-spore	0.017064	macromolecule-biosynthetic-process	0.004541
SRP-dependent-cotranslational-protein-targeting-to-membrane	0.042023	positive-regulation-of-transcription-from-RNA-polymerase-I-promoter	0.001704		M-phase	0.017095	vacuolar-transport	0.004747
protein-targeting-to-membrane	0.042101	cellular-macromolecular-complex-subunit-organization	0.002043		glycerolipid-metabolic-process	0.017194	generation-of-precursor-metabolites-and-energy	0.005062
biosynthetic-process	0.04217	rRNA-transcription	0.002069		regulation-of-protein-kinase-activity	0.017811	cellular-respiration	0.005072
response-to-chemical-stimulus	0.042188	RNA-transport	0.002113		reproductive-process-in-single-celled-organism	0.018148	cellular-macromolecule-localization	0.005142
cell-cycle-phase	0.042349	establishment-of-RNA-localization	0.002113		carboxylic-acid-biosynthetic-process	0.018332	cellular-macromolecule-biosynthetic-process	0.005397
organic-substance-transport	0.045011	primary-metabolic-process	0.002117		organic-acid-biosynthetic-process	0.018332	snoRNA-3'-end-processing	0.005866
cellular-response-to-stress	0.045112	RNA-localization	0.002729		DNA-metabolic-process	0.018485	cellular-response-to-external-stimulus	0.005957
cofactor-metabolic-process	0.045565	regulation-of-translational-initiation	0.002748		cellular-response-to-stimulus	0.019085	cellular-response-to-extracellular-stimulus	0.005957
protein-modification-by-small-protein-conjugation	0.046172	translational-initiation	0.00282		filamentous-growth-of-a-population-of-unicellular-organisms	0.019816	nuclear-polyadenylation-dependent-mRNA-catabolic-process	0.006048
establishment-of-nucleus-localization	0.047313	tRNA-transcription	0.002919		growth-of-unicellular-organism-as-a-thread-of-attached-cells	0.019816	nuclear-polyadenylation-dependent-tRNA-catabolic-process	0.006048
nuclear-migration	0.047313	tRNA-transcription-from-RNA-polymerase-III-promoter	0.002919		divalent-metal-ion-transport	0.020626	polyadenylation-dependent-mRNA-catabolic-process	0.006048
nucleus-localization	0.047313	localization	0.002939		NADPH-regeneration	0.020736	tRNA-catabolic-process	0.006048
regulation-of-kinase-activity	0.048251	cellular-macromolecule-biosynthetic-process	0.003048		response-to-pheromone-involved-in-conjugation-with-cellular-fusion	0.021513	protein-localization-to-organelle	0.006728
		proteasome-assembly	0.003156		phospholipid-biosynthetic-process	0.021684	response-to-starvation	0.006947
		proteasome-regulatory-particle-assembly	0.003229		protein-modification-process	0.022276	intracellular-protein-transport	0.006987
		nonfunctional-rRNA-decay	0.003257		cell-cycle-phase	0.023302	cellular-response-to-nutrient-levels	0.007235
		establishment-of-organelle-localization	0.003907		regulation-of-transferase-activity	0.023676	nuclear-mRNA-surveillance	0.007615
		RNA-surveillance	0.003939		positive-regulation-of-mitochondrial-translation	0.023815	regulation-of-protein-polymerization	0.007615
		nuclear-RNA-surveillance	0.003939		positive-regulation-of-mitochondrion-organization	0.023815	regulation-of-translational-initiation	0.007615
		mRNA-transport	0.004239		cellular-developmental-process	0.025621	protein-export-from-nucleus	0.007716
		vacuole-organization	0.004347		developmental-process	0.025836	tRNA-transport	0.007716
		macromolecule-biosynthetic-process	0.004498		ion-homeostasis	0.025841	cellular-response-to-starvation	0.00859
		transcription-of-nuclear-rRNA-large-RNA-polymerase-I-transcript	0.005552		cellular-ion-homeostasis	0.026218	cellular-nitrogen-compound-metabolic-process	0.009196
		protein-localization-to-organelle	0.006057		response-to-pheromone	0.026284	establishment-of-localization-in-cell	0.009432
		glycoprotein-metabolic-process	0.006446		regulation-of-chromatin-silencing-at-telomere	0.026525	tRNA-export-from-nucleus	0.009918
		nuclear-transcribed-mRNA-catabolic-process,-exonucleolytic	0.006582		filamentous-growth	0.026718	nitrogen-compound-metabolic-process	0.010482
		nucleic-acid-transport	0.006664		negative-regulation-of-cellular-metabolic-process	0.026993	cellular-catabolic-process	0.010782
		vacuolar-transport	0.006895		positive-regulation-of-GTPase-activity	0.027378	establishment-of-protein-localization-to-vacuole	0.011076
		regulation-of-protein-polymerization	0.007108		glutathione-metabolic-process	0.027483	protein-localization-to-vacuole	0.011076
		Golgi-to-vacuole-transport	0.00745		negative-regulation-of-nitrogen-compound-metabolic-process	0.028107	protein-targeting-to-vacuole	0.011076
		protein-targeting	0.007689		negative-regulation-of-nucleobase,-nucleoside,-nucleotide-and-nucleic-acid-metabolic-process	0.028107	catabolic-process	0.011155
		positive-regulation-of-cellular-component-organization	0.00784		chromosome-segregation	0.029497	regulation-of-actin-filament-length	0.011192
		positive-regulation-of-cytoskeleton-organization	0.008014		tRNA-wobble-base-modification	0.03013	regulation-of-actin-filament-polymerization	0.011192
		regulation-of-RNA-polymerase-II-transcriptional-preinitiation-complex-assembly	0.008014		tRNA-wobble-uridine-modification	0.03013	regulation-of-actin-polymerization-or-depolymerization	0.011192
		regulation-of-transcription-initiation,-DNA-dependent	0.008014		negative-regulation-of-metabolic-process	0.030307	nuclear-transcribed-mRNA-catabolic-process,-nonsense-mediated-decay	0.011341
		regulation-of-transcription-initiation-from-RNA-polymerase-II-promoter	0.008014		purine-base-biosynthetic-process	0.030543	aerobic-respiration	0.011882
		establishment-of-protein-localization-to-organelle	0.008112		cell-cycle	0.030584	chromosome-organization	0.011895
		macromolecular-complex-assembly	0.009628		anatomical-structure-development	0.031678	glutamate-metabolic-process	0.012439
		snRNA-metabolic-process	0.009704		anatomical-structure-morphogenesis	0.031678	modification-dependent-macromolecule-catabolic-process	0.012441
		glycoprotein-biosynthetic-process	0.009728		Golgi-to-plasma-membrane-transport	0.032391	RNA-3'-end-processing	0.012764
		regulation-of-actin-cytoskeleton-organization	0.009741		vesicle-docking	0.032391	vacuole-organization	0.013952
		regulation-of-actin-filament-based-process	0.009741		regulation-of-mitochondrion-organization	0.033594	Golgi-to-vacuole-transport	0.013976
		regulation-of-growth	0.010355		regulation-of-cellular-carbohydrate-metabolic-process	0.033659	establishment-of-protein-localization-in-endoplasmic-reticulum	0.014424
		transcription-from-RNA-polymerase-III-promoter	0.010723		regulation-of-glucose-metabolic-process	0.033659	protein-targeting-to-ER	0.014424
		chromatin-disassembly	0.010894		regulation-of-GTP-catabolic-process	0.033716	ER-to-Golgi-vesicle-mediated-transport	0.014427
		nucleosome-disassembly	0.010894		regulation-of-GTPase-activity	0.033716	ncRNA-3'-end-processing	0.014553
		protein-DNA-complex-disassembly	0.010894		pseudohyphal-growth	0.034243	cellular-component-assembly	0.014666
		tRNA-methylation	0.01121		cofactor-biosynthetic-process	0.035364	RNA-surveillance	0.014833
		exonucleolytic-nuclear-transcribed-mRNA-catabolic-process-involved-in-deadenylation-dependent-decay	0.011334		sister-chromatid-cohesion	0.03546	nuclear-RNA-surveillance	0.014833
		nuclear-transcribed-mRNA-catabolic-process,-3'-5'-exonucleolytic-nonsense-mediated-decay	0.011334		positive-regulation-of-macromolecule-biosynthetic-process	0.035926	cellular-component-assembly-at-cellular-level	0.015579
		nuclear-transcribed-mRNA-catabolic-process,-exonucleolytic,-3'-5'	0.011334		negative-regulation-of-cellular-process	0.036435	response-to-external-stimulus	0.015646
		establishment-of-protein-localization-to-vacuole	0.011373		glycerophospholipid-metabolic-process	0.036452	response-to-extracellular-stimulus	0.015646
		protein-localization-to-vacuole	0.011373		negative-regulation-of-cellular-macromolecule-biosynthetic-process	0.036465	cell-communication	0.016005
		protein-targeting-to-vacuole	0.011373		negative-regulation-of-macromolecule-biosynthetic-process	0.036465	protein-refolding	0.016462
		nucleotide-excision-repair	0.011931		M-phase-of-mitotic-cell-cycle	0.037108	nucleic-acid-transport	0.016747
		macromolecule-methylation	0.013436		negative-regulation-of-RNA-metabolic-process	0.037387	nucleus-organization	0.017639
		pentose-phosphate-shunt	0.0137		regulation-of-carbohydrate-biosynthetic-process	0.03806	nucleosome-organization	0.018567
		transcription-from-RNA-polymerase-I-promoter	0.013717		double-strand-break-repair	0.038393	U4-snRNA-3'-end-processing	0.01872
		glycosylation	0.014616		positive-regulation-of-molecular-function	0.039982	posttranscriptional-tethering-of-RNA-polymerase-II-gene-DNA-at-nuclear-periphery	0.01872
		nucleobase,-nucleoside,-nucleotide-and-nucleic-acid-transport	0.015009		regulation-of-cellular-ketone-metabolic-process	0.040065	response-to-nutrient-levels	0.018721
		cellular-macromolecular-complex-assembly	0.015964		negative-regulation-of-transcription,-DNA-dependent	0.040115	energy-reserve-metabolic-process	0.018966
		ATP-dependent-chromatin-remodeling	0.01609		heterocycle-biosynthetic-process	0.040244	mRNA-transport	0.019151
		protein-N-linked-glycosylation	0.016587		sister-chromatid-segregation	0.041036	protein-targeting	0.019841
		snoRNA-processing	0.016628		regulation-of-kinase-activity	0.041174	regulation-of-protein-complex-assembly	0.020237
		cellular-metabolic-process	0.017762		mitosis	0.041272	RNA-transport	0.020409
		U4-snRNA-3'-end-processing	0.01788		regulation-of-catalytic-activity	0.041351	establishment-of-RNA-localization	0.020409
		macromolecule-glycosylation	0.017881		protein-DNA-complex-assembly	0.041921	protein-catabolic-process	0.020967
		protein-glycosylation	0.017881		positive-regulation-of-catalytic-activity	0.042629	cellular-protein-catabolic-process	0.021113
		RNA-biosynthetic-process	0.018298		pre-replicative-complex-assembly	0.042654	proteolysis-involved-in-cellular-protein-catabolic-process	0.021171
		transcription,-DNA-dependent	0.018298		positive-regulation-of-macromolecule-metabolic-process	0.043017	establishment-of-protein-localization-to-organelle	0.021269
		snoRNA-metabolic-process	0.018803		positive-regulation-of-translation	0.043169	protein-complex-assembly	0.022312
		regulation-of-actin-filament-length	0.019369		inorganic-anion-transport	0.044048	regulation-of-transcription-from-RNA-polymerase-I-promoter	0.023094
		regulation-of-actin-filament-polymerization	0.019369		DNA-dependent-DNA-replication	0.044211	retrograde-vesicle-mediated-transport,-Golgi-to-ER	0.023574
		regulation-of-actin-polymerization-or-depolymerization	0.019369		negative-regulation-of-macromolecule-metabolic-process	0.045453	protein-localization-in-endoplasmic-reticulum	0.024048
		Golgi-vesicle-transport	0.02097		negative-regulation-of-gene-expression	0.045851	RNA-export-from-nucleus	0.024614
		cellular-component-disassembly	0.021357		cation-homeostasis	0.045865	snRNA-3'-end-processing	0.025221
		cellular-component-disassembly-at-cellular-level	0.021357		developmental-process-involved-in-reproduction	0.046172	transcription-dependent-tethering-of-RNA-polymerase-II-gene-DNA-at-nuclear-periphery	0.025221
		regulation-of-cell-growth	0.021744		negative-regulation-of-biological-process	0.047937	protein-peptidyl-prolyl-isomerization	0.0257
		transcription-termination,-DNA-dependent	0.022007		positive-regulation-of-biosynthetic-process	0.048038	cellular-protein-complex-assembly	0.026128
		DNA-dependent-transcriptional-preinitiation-complex-assembly	0.022312		positive-regulation-of-cellular-biosynthetic-process	0.048038	exonucleolytic-trimming-involved-in-rRNA-processing	0.026132
		chromatin-remodeling	0.022926		cellular-cation-homeostasis	0.048283	cellular-polysaccharide-biosynthetic-process	0.026472
		intra-Golgi-vesicle-mediated-transport	0.026231		nucleoside-metabolic-process	0.04968	cellular-localization	0.027723
		ncRNA-3'-end-processing	0.026966		regulation-of-protein-serine/threonine-kinase-activity	0.04973	mRNA-export-from-nucleus	0.029947
		metabolic-process	0.027339				snRNA-processing	0.030557
		exonucleolytic-trimming-involved-in-rRNA-processing	0.027619				cellular-glucan-metabolic-process	0.031582
		RNA-polymerase-II-transcriptional-preinitiation-complex-assembly	0.027768				glucan-metabolic-process	0.031582
		ATP-catabolic-process	0.027773				cellular-polysaccharide-metabolic-process	0.032886
		tRNA-metabolic-process	0.030118				electron-transport-chain	0.033032
		histone-acetylation	0.030357				ATP-catabolic-process	0.033556
		cellular-protein-metabolic-process	0.031591				protein-complex-subunit-organization	0.035098
		S-phase	0.032888				nuclear-transcribed-mRNA-catabolic-process,-deadenylation-dependent-decay	0.035107
		protein-metabolic-process	0.033758				regulation-of-cellular-component-biogenesis	0.035621
		protein-DNA-complex-subunit-organization	0.03436				RNA-localization	0.036472
		transcription-elongation,-DNA-dependent	0.035567				chromatin-remodeling	0.036557
		termination-of-RNA-polymerase-II-transcription	0.035626				primary-metabolic-process	0.037115
		chromatin-modification	0.037388				tRNA-metabolic-process	0.03723
		organelle-localization	0.037608				cellular-metabolic-process	0.037344
		RNA-3'-end-processing	0.037942				peptidyl-amino-acid-modification	0.038363
		carbohydrate-catabolic-process	0.03857				mRNA-catabolic-process	0.039378
		nuclear-transcribed-mRNA-catabolic-process,-non-stop-decay	0.043028				tRNA-aminoacylation-for-protein-translation	0.040668
		regulation-of-cytoskeleton-organization	0.04368				macroautophagy	0.042903
		exonucleolytic-trimming-to-generate-mature-3'-end-of-5.8S-rRNA-from-tricistronic-rRNA-transcript-(SSU-rRNA,-5.8S-rRNA,-LSU-rRNA)	0.044417				exonucleolytic-trimming-to-generate-mature-3'-end-of-5.8S-rRNA-from-tricistronic-rRNA-transcript-(SSU-rRNA,-5.8S-rRNA,-LSU-rRNA)	0.045292
		rRNA-3'-end-processing	0.044417				rRNA-3'-end-processing	0.045292
		CVT-pathway	0.045024				cellular-process	0.048049
		peptidyl-lysine-modification	0.045264				modification-dependent-protein-catabolic-process	0.048353
		mRNA-catabolic-process	0.047422				ubiquitin-dependent-protein-catabolic-process	0.048353
		phospholipid-transport	0.047639				cellular-protein-metabolic-process	0.049245
		protein-import-into-mitochondrial-matrix	0.048276
		internal-peptidyl-lysine-acetylation	0.049853
		internal-protein-amino-acid-acetylation	0.049853
		peptidyl-lysine-acetylation	0.049853

## Sheet: Supp Table 6
Supplementary Table 5
Gene set	GO process	P-value of enrichment
Heat_mobile	cellular_amino_acid_catabolic_process	0.0606021
Heat_mobile	amine_catabolic_process	0.0606021
Heat_mobile	aspartate_family_amino_acid_metabolic_process	0.0606021
Heat_mobile	cellular_amino_acid_metabolic_process	0.0606021
Heat_mobile	carboxylic_acid_catabolic_process	0.0606021
Heat_mobile	organic_acid_catabolic_process	0.0606021
Heat_mobile	sulfur_amino_acid_metabolic_process	0.0606021
Heat_mobile	aspartate_family_amino_acid_biosynthetic_process	0.0606021
Heat_mobile	cellular_amine_metabolic_process	0.0606021
Heat_mobile	amine_metabolic_process	0.0844898
Heat_mobile	glycine_metabolic_process	0.0844898
Heat_mobile	cellular_amino_acid_biosynthetic_process	0.0896258
Heat_mobile	amine_biosynthetic_process	0.0896258
Heat_mobile	negative_regulation_of_cellular_protein_metabolic_process	0.0904845
Heat_mobile	negative_regulation_of_protein_metabolic_process	0.0904845
Heat_mobile	sulfur_compound_metabolic_process	0.0904845
Heat_stationary	ribosome_biogenesis	3.41471e-45
Heat_stationary	rRNA_processing	1.16821e-40
Heat_stationary	ribonucleoprotein_complex_biogenesis	3.68173e-40
Heat_stationary	rRNA_metabolic_process	3.68173e-40
Heat_stationary	cellular_component_biogenesis_at_cellular_level	2.31531e-34
Heat_stationary	ncRNA_processing	3.52175e-32
Heat_stationary	ncRNA_metabolic_process	3.77739e-29
Heat_stationary	maturation_of_SSU-rRNA_from_tricistronic_rRNA_transcript_(SSU-rRNA,_5.8S_rRNA,_LSU-rRNA)	1.29638e-22
Heat_stationary	RNA_processing	4.77002e-22
Heat_stationary	ribosomal_large_subunit_biogenesis	4.77002e-22
Heat_stationary	maturation_of_SSU-rRNA	1.71052e-21
Heat_stationary	cellular_component_biogenesis	2.79819e-21
Heat_stationary	ribosomal_small_subunit_biogenesis	4.7156e-21
Heat_stationary	maturation_of_5.8S_rRNA	1.66214e-14
Heat_stationary	maturation_of_5.8S_rRNA_from_tricistronic_rRNA_transcript_(SSU-rRNA,_5.8S_rRNA,_LSU-rRNA)	1.66214e-14
Heat_stationary	endonucleolytic_cleavage_in_ITS1_to_separate_SSU-rRNA_from_5.8S_rRNA_and_LSU-rRNA_from_tricistronic_rRNA_transcript_(SSU-rRNA,_5.8S_rRNA,_LSU-rRNA)	1.76371e-11
Heat_stationary	endonucleolytic_cleavage_involved_in_rRNA_processing	1.76371e-11
Heat_stationary	endonucleolytic_cleavage_of_tricistronic_rRNA_transcript_(SSU-rRNA,_5.8S_rRNA,_LSU-rRNA)	1.76371e-11
Heat_stationary	ncRNA_5'-end_processing	3.02749e-11
Heat_stationary	rRNA_5'-end_processing	3.02749e-11
Heat_stationary	RNA_metabolic_process	3.24367e-11
Heat_stationary	RNA_5'-end_processing	5.11295e-11
Heat_stationary	endonucleolytic_cleavage_to_generate_mature_5'-end_of_SSU-rRNA_from_(SSU-rRNA,_5.8S_rRNA,_LSU-rRNA)	3.12386e-10
Heat_stationary	ribosomal_large_subunit_assembly	9.35156e-10
Heat_stationary	endonucleolytic_cleavage_in_5'-ETS_of_tricistronic_rRNA_transcript_(SSU-rRNA,_5.8S_rRNA,_LSU-rRNA)	1.83018e-09
Heat_stationary	gene_expression	3.25879e-09
Heat_stationary	ribosome_assembly	3.62695e-09
Heat_stationary	cleavage_involved_in_rRNA_processing	4.06237e-09
Heat_stationary	nucleic_acid_metabolic_process	1.58638e-07
Heat_stationary	organelle_assembly	1.97307e-07
Heat_stationary	maturation_of_LSU-rRNA	1.99498e-07
Heat_stationary	maturation_of_LSU-rRNA_from_tricistronic_rRNA_transcript_(SSU-rRNA,_5.8S_rRNA,_LSU-rRNA)	1.99498e-07
Heat_stationary	cellular_component_organization_or_biogenesis_at_cellular_level	1.11148e-05
Heat_stationary	ribonucleoprotein_complex_subunit_organization	1.11148e-05
Heat_stationary	nucleic_acid_phosphodiester_bond_hydrolysis	1.72318e-05
Heat_stationary	cellular_component_organization_or_biogenesis	2.05587e-05
Heat_stationary	nucleobase,_nucleoside,_nucleotide_and_nucleic_acid_metabolic_process	2.5801e-05
Heat_stationary	ribonucleoprotein_complex_assembly	2.74513e-05
Heat_stationary	regulation_of_transcription_from_RNA_polymerase_I_promoter	3.34763e-05
Heat_stationary	cellular_macromolecule_metabolic_process	4.04035e-05
Heat_stationary	positive_regulation_of_transcription_from_RNA_polymerase_I_promoter	4.04035e-05
Heat_stationary	macromolecule_metabolic_process	6.23611e-05
Heat_stationary	ribosomal_large_subunit_export_from_nucleus	0.00109356
Heat_stationary	establishment_of_ribosome_localization	0.00109356
Heat_stationary	rRNA-containing_ribonucleoprotein_complex_export_from_nucleus	0.00109356
Heat_stationary	ribonucleoprotein_complex_export_from_nucleus	0.00109356
Heat_stationary	ribonucleoprotein_complex_localization	0.00109356
Heat_stationary	ribosomal_subunit_export_from_nucleus	0.00109356
Heat_stationary	ribosome_localization	0.00109356
Heat_stationary	nitrogen_compound_metabolic_process	0.00153287
Heat_stationary	cellular_nitrogen_compound_metabolic_process	0.00198167
Heat_stationary	protein_refolding	0.00374427
Heat_stationary	regulation_of_ATPase_activity	0.0148614
Heat_stationary	rRNA_modification	0.019599
Heat_stationary	nuclear_export	0.019957
Heat_stationary	protein_folding	0.0213944
Heat_stationary	nuclear_transport	0.0537495
Heat_stationary	nucleocytoplasmic_transport	0.0537495
Heat_stationary	establishment_of_organelle_localization	0.0727775
Heat_stationary	cellular_macromolecular_complex_assembly	0.0929724
Heat_stationary	macromolecular_complex_assembly	0.0963996
Carbon_stationary	ribosome_biogenesis	3.95753e-44
Carbon_stationary	ribonucleoprotein_complex_biogenesis	3.68131e-37
Carbon_stationary	rRNA_processing	8.98239e-37
Carbon_stationary	rRNA_metabolic_process	6.44058e-36
Carbon_stationary	cellular_component_biogenesis_at_cellular_level	2.60451e-33
Carbon_stationary	ncRNA_processing	3.54379e-31
Carbon_stationary	ncRNA_metabolic_process	4.56443e-26
Carbon_stationary	ribosomal_small_subunit_biogenesis	7.59476e-22
Carbon_stationary	maturation_of_SSU-rRNA_from_tricistronic_rRNA_transcript_(SSU-rRNA,_5.8S_rRNA,_LSU-rRNA)	1.393e-20
Carbon_stationary	maturation_of_SSU-rRNA	2.98501e-20
Carbon_stationary	cellular_component_biogenesis	1.03202e-19
Carbon_stationary	ribosomal_large_subunit_biogenesis	1.82337e-19
Carbon_stationary	RNA_processing	2.12116e-18
Carbon_stationary	maturation_of_5.8S_rRNA	3.28253e-15
Carbon_stationary	maturation_of_5.8S_rRNA_from_tricistronic_rRNA_transcript_(SSU-rRNA,_5.8S_rRNA,_LSU-rRNA)	3.28253e-15
Carbon_stationary	endonucleolytic_cleavage_in_ITS1_to_separate_SSU-rRNA_from_5.8S_rRNA_and_LSU-rRNA_from_tricistronic_rRNA_transcript_(SSU-rRNA,_5.8S_rRNA,_LSU-rRNA)	1.37007e-14
Carbon_stationary	endonucleolytic_cleavage_involved_in_rRNA_processing	1.37007e-14
Carbon_stationary	endonucleolytic_cleavage_of_tricistronic_rRNA_transcript_(SSU-rRNA,_5.8S_rRNA,_LSU-rRNA)	1.37007e-14
Carbon_stationary	ncRNA_5'-end_processing	5.50145e-11
Carbon_stationary	rRNA_5'-end_processing	5.50145e-11
Carbon_stationary	RNA_5'-end_processing	1.17235e-10
Carbon_stationary	endonucleolytic_cleavage_to_generate_mature_5'-end_of_SSU-rRNA_from_(SSU-rRNA,_5.8S_rRNA,_LSU-rRNA)	3.85824e-10
Carbon_stationary	cleavage_involved_in_rRNA_processing	4.04406e-10
Carbon_stationary	RNA_metabolic_process	6.1858e-10
Carbon_stationary	endonucleolytic_cleavage_in_5'-ETS_of_tricistronic_rRNA_transcript_(SSU-rRNA,_5.8S_rRNA,_LSU-rRNA)	1.16489e-09
Carbon_stationary	maturation_of_LSU-rRNA	1.66532e-08
Carbon_stationary	maturation_of_LSU-rRNA_from_tricistronic_rRNA_transcript_(SSU-rRNA,_5.8S_rRNA,_LSU-rRNA)	1.66532e-08
Carbon_stationary	gene_expression	1.06241e-06
Carbon_stationary	nucleic_acid_phosphodiester_bond_hydrolysis	2.45816e-06
Carbon_stationary	establishment_of_ribosome_localization	7.25387e-06
Carbon_stationary	rRNA-containing_ribonucleoprotein_complex_export_from_nucleus	7.25387e-06
Carbon_stationary	ribonucleoprotein_complex_export_from_nucleus	7.25387e-06
Carbon_stationary	ribonucleoprotein_complex_localization	7.25387e-06
Carbon_stationary	ribosomal_subunit_export_from_nucleus	7.25387e-06
Carbon_stationary	ribosome_localization	7.25387e-06
Carbon_stationary	ribosome_assembly	1.03435e-05
Carbon_stationary	ribosomal_large_subunit_assembly	1.46917e-05
Carbon_stationary	nuclear_export	2.42663e-05
Carbon_stationary	nuclear_transport	2.50037e-05
Carbon_stationary	nucleocytoplasmic_transport	2.50037e-05
Carbon_stationary	nucleic_acid_metabolic_process	3.71555e-05
Carbon_stationary	ribosomal_large_subunit_export_from_nucleus	0.000130225
Carbon_stationary	organelle_assembly	0.000490583
Carbon_stationary	cellular_component_organization_or_biogenesis_at_cellular_level	0.000577025
Carbon_stationary	positive_regulation_of_transcription_from_RNA_polymerase_I_promoter	0.00186875
Carbon_stationary	RNA_methylation	0.0019699
Carbon_stationary	cellular_component_organization_or_biogenesis	0.00224701
Carbon_stationary	nucleobase,_nucleoside,_nucleotide_and_nucleic_acid_metabolic_process	0.00305638
Carbon_stationary	establishment_of_organelle_localization	0.00574316
Carbon_stationary	rRNA_modification	0.00720978
Carbon_stationary	transcription_of_nuclear_rRNA_large_RNA_polymerase_I_transcript	0.00720978
Carbon_stationary	nitrogen_compound_metabolic_process	0.00730952
Carbon_stationary	cellular_nitrogen_compound_metabolic_process	0.00735485
Carbon_stationary	negative_regulation_of_hydrolase_activity	0.0111565
Carbon_stationary	transcription_from_RNA_polymerase_I_promoter	0.0118781
Carbon_stationary	regulation_of_transcription_from_RNA_polymerase_I_promoter	0.0140839
Carbon_stationary	ribonucleoprotein_complex_subunit_organization	0.0153994
Carbon_stationary	energy_reserve_metabolic_process	0.0186788
Carbon_stationary	rRNA_transcription	0.0186788
Carbon_stationary	proteasome_assembly	0.0190266
Carbon_stationary	ribonucleoprotein_complex_assembly	0.0237508
Carbon_stationary	organelle_localization	0.0391176
Carbon_stationary	RNA_modification	0.0550935
Carbon_stationary	tRNA_methylation	0.0722685
Carbon_stationary	protein_export_from_nucleus	0.0920036
